# Supplementary material for: Integrated Analysis of Long Noncoding RNA and Coding RNA Expression in Esophageal Squamous Cell Carcinoma
Source: Int J Genomics. 2013 Oct 7;2013:480534. doi: 10.1155/2013/480534 (PMC3814080; doi:10.1155/2013/480534)
Supplement: Supplementary file 1 — Supplementary Figure 1: Gene Ontology analysis of differentially expressed coding genes (DE-mRNAs). Supplementary Table 1: List of differentially expressed long noncoding RNAs (lncRNAs) in Esophageal squamous cell carcinoma (ESCC). Supplementary Table 2: List of differentially expressed coding RNAs in Esophageal squamous cell carcinoma (ESCC). [file 480534.f1.zip › IJG_Suppl.Table_1_and_2_CFG_606397.xlsx]

## Sheet: 410 DE-lncRNAs in ESCC
ProbeName	p	FC	Regulation	LncRNA name	Description	Cytoband	GenomicCoordinates	LncRNA associated genes
A_19_P00801495	0.00432543	29.955	up	ESCCAL-1	lincRNA:chr8:76121095-76189420 reverse strand	hs|8q21.11	chr8:76139826-76139767	HNF4G (-312406), CRISPLD1 (+243089)
A_19_P00324915	0.00115578	27.5161	down	ESCCAL-2	lincRNA:chr2:238532786-238566833 reverse strand	hs|2q37.3	chr2:238535109-238535050	LRRFIP1 (-65727), RAB17 (-35311)
A_19_P00809217	0.000874467	27.1251	down	ESCCAL-3	lincRNA:chr6:14700246-14748171 reverse strand	hs|6p23	chr6:14715713-14715654	JARID2 (-530843), CD83 (+597819)
A_19_P00325583	0.000862829	21.0382	down	ESCCAL-4	lincRNA:chr5:141732516-141745491 reverse strand	hs|5q31.3	chr5:141732627-141732568	SPRY4 (-27978), FGF1 (+333055)
A_19_P00322023	0.00180929	20.8116	down	XLOC_013732	BROAD lincRNAs version v2 (http://www.broadinstitute.org/genome_bio/human_lincrnas/)	hs|20q11.23	chr20:36121319-36121260	NNAT (-28317), SRC (+146733)
A_19_P00315593	0.00143209	20.4974	down	XLOC_004643	BROAD lincRNAs version v2 (http://www.broadinstitute.org/genome_bio/human_lincrnas/)	hs|5q35.2	chr5:173132615-173132674	CPEB4 (-182686), BOD1 (-88979)
A_19_P00318734	0.00164501	19.8079	up	ESCCAL-5	lincRNA:chr2:216585154-216585719 forward strand	hs|2q35	chr2:216585455-216585514	FN1 (-284694), MREG (+292861)
A_19_P00803403	0.00752985	19.4455	down	ESCCAL-6	lincRNA:chr15:25279777-25281631 reverse strand	hs|15q12	chr15:25279853-25279794	SNURF (+79754), UBE3A (+404351)
A_19_P00802837	0.0137458	16.926	down	ESCCAL-7	lincRNA:chr9:2683000-2711050 forward strand	hs|9p24.2	chr9:2691753-2691812	KCNV2 (-25743), VLDLR (+69990)
A_19_P00330674	0.00881028	16.5621	down	ESCCAL-8	lincRNA:chr9:34666200-34672975 reverse strand	hs|9p13.3	chr9:34668311-34668252	CCL27 (-5593), CCL19 (+22992)
A_19_P00329963	0.00158166	15.9271	down	ESCCAL-9	lincRNA:chr11:102257165-102265615 forward strand	hs|11q22.2	chr11:102264211-102264270	BIRC2 (+46275), TMEM123 (+59534)
A_19_P00321919	0.00317447	15.6081	up	ESCCAL-10	lincRNA:chr22:48081989-48086596 forward strand	hs|22q13.32	chr22:48086469-48086528	FAM19A5 (-798789), TBC1D22A (+927981)
A_19_P00812226	0.00143068	14.9863	down	ESCCAL-11	lincRNA:chr4:84282701-84301201 forward strand	hs|4q21.22	chr4:84299039-84299098	HPSE (-43035), HELQ (+77956)
A_19_P00324808	0.00322415	14.1706	up	ESCCAL-12	lincRNA:chr7:93274839-93287314 reverse strand	hs|7q21.3	chr7:93287087-93287028	CALCR (-83016), TFPI2 (+233007)
A_19_P00813100	0.00183421	13.604	down	ESCCAL-13	lincRNA:chr13:63629474-63649499 forward strand	hs|13q21.31	chr13:63648371-63648430	NONE
A_19_P00321671	0.0103721	13.277	up	ESCCAL-14	lincRNA:chr4:90602662-90614309 forward strand	hs|4q22.1	chr4:90612493-90612552	SNCA (+145827), TIGD2 (+578555)
A_19_P00329018	0.0487569	11.8981	up	ESCCAL-15	lincRNA:chr12:96998894-97004069 forward strand	hs|12q23.1	chr12:97002553-97002612	NEDD1 (-298418), CDK17 (-208217)
A_19_P00321932	0.0386874	11.8673	up	ESCCAL-16	lincRNA:chr3:165221024-165290561 reverse strand	hs|3q26.1	chr3:165246271-165246212	SLITRK3 (-331773), BCHE (+309011)
A_19_P00812483	0.000687323	11.8275	down	ESCCAL-17	lincRNA:chr1:118219527-118258852 reverse strand	hs|1p12	chr1:118242911-118242852	GDAP2 (+229420), MAN1A2 (+332797)
A_19_P00808519	0.0195091	11.7791	up	ESCCAL-18	lincRNA:chr8:107055124-107072278 reverse strand	hs|8q23.1	chr8:107055862-107055803	OXR1 (-404319), ZFPM2 (+724686)
A_19_P00812697	0.00293244	10.3634	up	ESCCAL-19	lincRNA:chr12:66204346-66204839 reverse strand	hs|12q15	chr12:66204406-66204347	HMGA2 (-13863), MSRB3 (+531610)
A_19_P00802663	0.0421769	9.66326	up	ESCCAL-20	lincRNA:chr3:187546031-187607831 reverse strand	hs|3q27.3	chr3:187562673-187562614	LPP (-368077), BCL6 (-99131)
A_19_P00332072	0.000774555	9.47602	down	ESCCAL-21	lincRNA:chr7:22603825-22723450 forward strand	hs|7p15.3	chr7:22719864-22719923	STEAP1B (-179993), IL6 (-46872)
A_19_P00804937	0.00660845	9.30038	down	ESCCAL-22	lincRNA:chr20:36123386-36133586 forward strand	hs|20q11.23	chr20:36133513-36133572	NNAT (-16064), SRC (+158986)
A_19_P00800249	0.00099908	8.95882	down	ESCCAL-23	lincRNA:chr16:50304099-50310474 reverse strand	hs|16q12.1	chr16:50309106-50309047	ADCY7 (-12746), PAPD5 (+122248)
A_19_P00322242	0.00198284	8.39077	down	ESCCAL-24	lincRNA:chr12:132823992-132905935 reverse strand	hs|12	chr12:132824534-132824475	GALNT9 (+81400), NOC4L (+195512)
A_19_P00805588	0.00543918	7.93645	down	ESCCAL-25	lincRNA:chr19:20963860-21031685 reverse strand	hs|19p12	chr19:20999300-20999241	ZNF626 (-154869), ZNF85 (-106788)
A_19_P00316881	7.53271e-05	7.65159	down	ESCCAL-26	lincRNA:chr2:235353233-235363239 reverse strand	hs|2q37.2	chr2:235358881-235358822	ARL4C (+46841), SPP2 (+399506)
A_19_P00807801	0.015885	7.56499	down	ESCCAL-27	lincRNA:chr18:2508800-2520025 forward strand	hs|18p11.32	chr18:2508887-2508946	METTL4 (+62572)
A_19_P00323511	0.00421354	7.27694	down	ESCCAL-28	lincRNA:chr4:125539675-125571625 reverse strand	hs|4q28.1	chr4:125569276-125569217	FAT4 (-668320)
A_19_P00326008	0.000242356	6.98042	up	ESCCAL-29	lincRNA:chr1:247117452-247127827 reverse strand	hs|1q44	chr1:247126338-247126279	AHCTF1 (-31583), ZNF695 (+45086)
A_19_P00328993	0.0010732	6.93819	down	ESCCAL-30	lincRNA:chr4:42675-51825 reverse strand	hs|4p16.3	chr4:44619-44560	ZNF718 (-8637)
A_19_P00800729	0.0242718	6.84291	up	ESCCAL-31	lincRNA:chr1:225175977-225243477 forward strand	hs|1q42.13	chr1:225237693-225237752	DNAH14 (+120367), LBR (+378092)
A_19_P00328505	0.0235755	6.66092	up	ESCCAL-32	lincRNA:chr8:107055124-107072066 reverse strand	hs|8q23.1	chr8:107055795-107055736	OXR1 (-404386), ZFPM2 (+724619)
A_19_P00323763	0.0124178	6.62988	down	ESCCAL-33	lincRNA:chr2:74193717-74210392 reverse strand	hs|2p13.1	chr2:74208245-74208186	TET3 (-65234), DGUOK (+54263)
A_19_P00802448	0.00218594	6.5162	down	XLOC_004881	BROAD lincRNAs version v2 (http://www.broadinstitute.org/genome_bio/human_lincrnas/)	hs|5q13.2	chr5:72570680-72570621	TMEM174 (+101628), FOXD1 (+173701)
A_19_P00805614	0.00131883	6.41716	down	ESCCAL-34	lincRNA:chr14:101292196-101327355 reverse strand	hs|14q32.31	chr14:101295113-101295054	MEG3 (-2674)
A_19_P00318992	0.00566509	6.34138	up	XLOC_010390	BROAD lincRNAs version v2 (http://www.broadinstitute.org/genome_bio/human_lincrnas/)	hs|13q14.3	chr13:50983102-50983161	RNASEH2B (-500682), ST13P4 (+236978)
A_19_P00316358	0.00132774	6.33349	down	ESCCAL-35	lincRNA:chr3:193547409-193550460 reverse strand	hs|3q28	chr3:193550282-193550223	HES1 (-303678), OPA1 (+239320)
A_19_P00812083	0.00393672	6.18925	down	ESCCAL-36	lincRNA:chr6:106858857-106926507 forward strand	hs|6q21	chr6:106899513-106899572	ATG5 (-125848), AIM1 (-59762)
A_19_P00806432	0.000114045	6.0687	up	ESCCAL-37	lincRNA:chr12:66185548-66186827 reverse strand	hs|12q15	chr12:66185977-66185918	HMGA2 (-32292), MSRB3 (+513181)
A_19_P00330814	0.0054384	6.02001	up	ESCCAL-38	lincRNA:chr12:54356229-54357908 reverse strand	hs|12q13.2	chr12:54356679-54356620	HOXC11 (-10260), HOXC12 (+7936)
A_19_P00804827	0.00604343	5.88234	down	ESCCAL-39	lincRNA:chr1:9209361-9210752 reverse strand	hs|1p36.22	chr1:9209849-9209790	H6PD (-85043), GPR157 (-20591)
A_19_P00328208	0.00584832	5.66513	down	ESCCAL-40	lincRNA:chr10:120035785-120047303 forward strand	hs|10q26.11	chr10:120042723-120042782	RAB11FIP2 (-236639), PRLHR (+312407)
A_19_P00803502	0.00253465	5.59622	down	ESCCAL-41	lincRNA:chr4:8490675-8515950 forward strand	hs|4p16.1	chr4:8512901-8512960	GPR78 (-69286), METTL19 (+70399)
A_19_P00806273	0.0421756	5.40805	down	ESCCAL-42	lincRNA:chrX:149362642-149606842 forward strand	hs|Xq28	chrX:149574361-149574420	MTM1 (-162656), MAMLD1 (+42840)
A_19_P00809979	0.0102529	5.30868	up	ESCCAL-43	lincRNA:chr16:83951024-83958049 forward strand	hs|16q24.1	chr16:83955165-83955224	OSGIN1 (-31632), MLYCD (+22465)
A_19_P00315651	0.000859873	5.27356	down	XLOC_013837	BROAD lincRNAs version v2 (http://www.broadinstitute.org/genome_bio/human_lincrnas/)	hs|20q13.33	chr20:61405827-61405768	C20orf20 (-22007), NTSR1 (+65609)
A_19_P00801041	0.00125668	5.24929	down	ESCCAL-44	lincRNA:chr20:57402102-57402646 reverse strand	hs|20q13.32	chr20:57402346-57402287	GNAS (-12478), NPEPL1 (+134455)
A_19_P00322953	0.0043005	5.18581	down	XLOC_002319	BROAD lincRNAs version v2 (http://www.broadinstitute.org/genome_bio/human_lincrnas/)	hs|2q21.1	chr2:130626885-130626826	RAB6C (-110379)
A_19_P00321998	0.00338792	5.01804	down	ESCCAL-45	lincRNA:chr6:147172226-147237021 reverse strand	hs|6q24.3	chr6:147232747-147232688	STXBP5 (-292776), C6orf103 (+312582)
A_19_P00804546	0.00162074	5.00043	up	ESCCAL-46	lincRNA:chrX:133675909-133683184 reverse strand	hs|Xq26.3	chrX:133677444-133677385	HPRT1 (+83240), PLAC1 (+115098)
A_19_P00318037	0.0298406	4.97562	up	ESCCAL-47	lincRNA:chr8:128427130-128428271 forward strand	hs|8q24.21	chr8:128427703-128427762	POU5F1B (-124)
A_19_P00802363	0.000212791	4.96075	up	ESCCAL-48	lincRNA:chr1:225226849-225227289 forward strand	hs|1q42.13	chr1:225227029-225227088	DNAH14 (+109703), LBR (+388756)
A_19_P00318057	0.0075927	4.94954	down	ESCCAL-49	lincRNA:chr4:15670037-15683240 reverse strand	hs|4p15.32	chr4:15683203-15683144	FAM200B (-178)
A_19_P00320181	0.0145466	4.91576	down	ESCCAL-50	lincRNA:chr8:29531437-29535495 forward strand	hs|8p21.1	chr8:29531780-29531839	DUSP4 (-323543), TMEM66 (+408839)
A_19_P00810001	0.0185846	4.89548	down	ESCCAL-51	lincRNA:chr21:29918229-30215104 forward strand	hs|21q21.3	chr21:30204690-30204749	N6AMT1 (+52973)
A_19_P00316185	0.000612297	4.85966	down	XLOC_005810	BROAD lincRNAs version v2 (http://www.broadinstitute.org/genome_bio/human_lincrnas/)	hs|6q22.1	chr6:113944492-113944433	MARCKS (-234064)
A_19_P00809906	0.0292658	4.82719	down	ESCCAL-52	lincRNA:chr14:71276672-71284022 reverse strand	hs|14q24.2	chr14:71281917-71281858	PCNX (-92234), MAP3K9 (-6000)
A_19_P00331141	0.026732	4.78126	down	ESCCAL-53	lincRNA:chr8:53627372-53637572 reverse strand	hs|8q11.23	chr8:53636752-53636693	NPBWR1 (-215745), RB1CC1 (-9697)
A_19_P00323021	0.00370923	4.77881	down	ESCCAL-54	lincRNA:chr6:25992889-25998457 forward strand	hs|6p22.2	chr6:25992906-25992965	HIST1H1A (+25104), TRIM38 (+29865)
A_19_P00327974	0.000120151	4.67769	up	ESCCAL-55	lincRNA:chr12:66166633-66206633 reverse strand	hs|12q15	chr12:66185835-66185776	HMGA2 (-32434), MSRB3 (+513039)
A_19_P00807053	0.00188964	4.67676	down	ESCCAL-56	lincRNA:chr14:71276672-71284022 forward strand	hs|14q24.2	chr14:71281913-71281972	PCNX (-92179), MAP3K9 (-6055)
A_19_P00812705	0.00412726	4.66695	down	ESCCAL-57	lincRNA:chr4:26806777-26850102 reverse strand	hs|4p15.2	chr4:26823849-26823790	STIM2 (-38493), TBC1D19 (+238274)
A_19_P00804027	0.0173962	4.66236	down	ESCCAL-58	lincRNA:chr8:16347304-16355399 forward strand	hs|8p22	chr8:16355082-16355141	MSR1 (-304812), FGF20 (+504562)
A_19_P00318679	0.0192278	4.62878	down	XLOC_011510	BROAD lincRNAs version v2 (http://www.broadinstitute.org/genome_bio/human_lincrnas/)	hs|15q23	chr15:67279824-67279765	SMAD3 (-78400), SMAD6 (+285121)
A_19_P00325201	0.0218977	4.61077	down	ESCCAL-59	lincRNA:chr3:64852785-64864310 forward strand	hs|3p14.1	chr3:64855048-64855107	ADAMTS9 (-181713)
A_19_P00315529	0.00421276	4.56754	down	XLOC_008370	BROAD lincRNAs version v2 (http://www.broadinstitute.org/genome_bio/human_lincrnas/)	hs|10p15.1	chr10:6628756-6628815	PRKCQ (-6532), SFMBT2 (+824662)
A_19_P00803131	0.0128182	4.56674	down	ESCCAL-60	lincRNA:chr1:247136652-247145277 forward strand	hs|1q44	chr1:247142823-247142882	AHCTF1 (-48127), ZNF695 (+28542)
A_19_P00804601	0.0141492	4.5313	down	ESCCAL-61	lincRNA:chr11:3402374-3408174 forward strand	hs|11p15.4	chr11:3407727-3407786	ZNF195 (-7305), ART5 (+255728)
A_19_P00318938	0.025779	4.52376	up	XLOC_002569	BROAD lincRNAs version v2 (http://www.broadinstitute.org/genome_bio/human_lincrnas/)	hs|3p26.1	chr3:6599336-6599395	GRM7 (-303436)
A_19_P00323040	0.0186571	4.51717	down	ESCCAL-62	lincRNA:chr3:164924749-165209054 forward strand	hs|3q26.1	chr3:165208995-165209054	SLITRK3 (-294556), BCHE (+346228)
A_19_P00320735	0.00226305	4.49515	down	ESCCAL-63	lincRNA:chr3:160981722-160983945 forward strand	hs|3q25.33	chr3:160983560-160983619	NMD3 (+44491), SPTSSB (+106281)
A_19_P00323023	0.00273546	4.49411	up	ESCCAL-64	lincRNA:chr6:21822794-21822968 forward strand	hs|6p22.3	chr6:21822909-21822968	SOX4 (+228967), PRL (+480143)
A_19_P00329557	0.0473086	4.48497	up	ESCCAL-65	lincRNA:chr11:2017106-2017228 forward strand	hs|11p15.5	chr11:2017146-2017205	MRPL23 (+48674), IGF2 (+145165)
A_19_P00319266	0.0119415	4.45029	down	ESCCAL-66	lincRNA:chr3:106940579-106949939 reverse strand	hs|3q13.11	chr3:106949902-106949843	BBX (-291910)
A_19_P00321973	0.000628992	4.42057	up	ESCCAL-67	lincRNA:chr2:111954496-112125102 reverse strand	hs|2q13	chr2:111954669-111954610	BCL2L11 (+76149), ANAPC1 (+687101)
A_19_P00318418	3.1606e-05	4.418	down	ESCCAL-68	lincRNA:chr7:139487141-139489421 forward strand	hs|7q34	chr7:139487166-139487225	TBXAS1 (-41756), HIPK2 (-9503)
A_19_P00323082	0.0125732	4.40864	up	ESCCAL-69	lincRNA:chr11:2016408-2017024 reverse strand	hs|11p15.5	chr11:2017020-2016961	MRPL23 (+48489), IGF2 (+145350)
A_19_P00321754	0.0109351	4.38433	up	ESCCAL-70	lincRNA:chr6:22113602-22194389 forward strand	hs|6p22.3	chr6:22113605-22113664	PRL (+189447), SOX4 (+519663)
A_19_P00329269	0.0130797	4.35335	down	ESCCAL-71	lincRNA:chr9:6521875-6528775 reverse strand	hs|9p24.1	chr9:6527325-6527266	UHRF2 (+114145), GLDC (+118396)
A_19_P00806582	0.0361471	4.35301	down	ESCCAL-72	lincRNA:chr4:74910186-74948161 reverse strand	hs|4q13.3	chr4:74922502-74922443	CXCL3 (-17983), CXCL2 (+42524)
A_19_P00812761	0.00314212	4.3519	down	ESCCAL-73	lincRNA:chr6:36115572-36151897 forward strand	hs|6p21.31	chr6:36126663-36126722	BRPF3 (-37857), MAPK13 (+28431)
A_19_P00329571	0.00444946	4.33584	down	ESCCAL-74	lincRNA:chr2:47547646-47560546 forward strand	hs|2p21	chr2:47548478-47548537	CALM2 (-144768), EPCAM (-47779)
A_19_P00325434	0.000247052	4.30962	up	ESCCAL-75	lincRNA:chr6:3708951-3719951 reverse strand	hs|6p25.2	chr6:3710825-3710766	SLC22A23 (-254003), PXDC1 (+41450)
A_19_P00319876	0.00832974	4.26342	up	XLOC_011548	BROAD lincRNAs version v2 (http://www.broadinstitute.org/genome_bio/human_lincrnas/)	hs|15q25.2	chr15:81953024-81952965	TMC3 (-286577), MEX3B (+385366)
A_19_P00810384	0.00434821	4.22694	down	ESCCAL-76	lincRNA:chr1:90090112-90097487 forward strand	hs|1p22.2	chr1:90091283-90091342	LRRC8C (-7331), LRRC8B (+100916)
A_19_P00332005	0.00275449	4.20342	down	ESCCAL-77	lincRNA:chr1:201592177-201616627 reverse strand	hs|1q32.1	chr1:201592869-201592810	CSRP1 (-116873), NAV1 (-24610)
A_19_P00321766	0.00267279	4.18844	up	ESCCAL-78	lincRNA:chr6:21666645-21743243 forward strand	hs|6p22.3	chr6:21743184-21743243	SOX4 (+149242), PRL (+559868)
A_19_P00810302	0.00933751	4.18663	down	ESCCAL-79	lincRNA:chr4:79623626-79634676 reverse strand	hs|4q21.21	chr4:79626460-79626401	BMP2K (-71101), ANXA3 (+153689)
A_19_P00813069	0.0306632	4.15089	down	ESCCAL-80	lincRNA:chr3:177832281-178039381 reverse strand	hs|3q26.32	chr3:177935638-177935579	KCNMB2 (-318615)
A_19_P00803912	0.000618047	4.14432	up	ESCCAL-81	lincRNA:chr5:141705866-141714891 forward strand	hs|5q31.3	chr5:141710377-141710436	SPRY4 (-5787), FGF1 (+355246)
A_19_P00315936	0.0124202	4.13534	down	ESCCAL-82	lincRNA:chr3:72109756-72284662 reverse strand	hs|3p13	chr3:72283358-72283299	PROK2 (-448972), RYBP (+212445)
A_19_P00317631	0.0057129	4.12843	down	ESCCAL-83	lincRNA:chr2:70259265-70278750 reverse strand	hs|2p14	chr2:70259372-70259313	ASPRV1 (-69946), PCBP1 (-55242)
A_19_P00332443	0.000809884	4.11664	down	ESCCAL-84	lincRNA:chr12:57808558-57820783 forward strand	hs|12q14.1	chr12:57820490-57820549	R3HDM2 (-116274), INHBC (-8023)
A_19_P00323965	0.0198566	4.0353	down	ESCCAL-85	lincRNA:chr3:156477781-156539131 reverse strand	hs|3q25.31	chr3:156492940-156492881	TIPARP (+98458), CCNL1 (+385571)
A_19_P00331960	0.0101727	3.98549	down	ESCCAL-86	lincRNA:chr1:94266387-94278537 forward strand	hs|1p22.1	chr1:94278027-94278086	BCAR3 (-130672), DNTTIP2 (+66705)
A_19_P00315633	0.00842702	3.98213	down	ESCCAL-87	lincRNA:chr7:19958603-20007776 reverse strand	hs|7p15.3	chr7:19958800-19958741	TMEM196 (-146367), MACC1 (+298242)
A_19_P00813291	0.00213287	3.97588	down	ESCCAL-88	lincRNA:chr11:130730240-130745290 forward strand	hs|11q25	chr11:130742634-130742693	SNX19 (+43718), ADAMTS15 (+423795)
A_19_P00329656	0.0331974	3.97183	down	ESCCAL-89	lincRNA:chr21:44907647-44916227 reverse strand	hs|21q22.3	chr21:44909668-44909609	SIK1 (-62637), HSF2BP (+169735)
A_19_P00318384	0.00532963	3.92134	down	ESCCAL-90	lincRNA:chr3:195441633-195441971 reverse strand	hs|3q29	chr3:195441846-195441787	MUC20 (-5936), SDHAP2 (+56907)
A_19_P00808792	0.0463213	3.90334	up	ESCCAL-91	lincRNA:chr13:48581699-48595174 reverse strand	hs|13q14.2	chr13:48594359-48594300	SUCLA2 (-18868), NUDT15 (-17373)
A_19_P00810334	0.0271753	3.87376	down	ESCCAL-92	lincRNA:chr6:100751729-100760229 forward strand	hs|6q16.3	chr6:100753328-100753387	MCHR2 (-311244), SIM1 (+158453)
A_19_P00331788	0.0119094	3.86458	down	ESCCAL-93	lincRNA:chr12:46996033-47032733 reverse strand	hs|12q13.11	chr12:46997092-46997033	SLC38A2 (-230418), SLC38A4 (+222717)
A_19_P00800621	0.0187949	3.85881	down	ESCCAL-94	lincRNA:chr21:29918229-30215104 reverse strand	hs|21q21.3	chr21:29979850-29979791	N6AMT1 (+277872)
A_19_P00316551	0.00311872	3.8115	down	ESCCAL-95	lincRNA:chr4:124866724-124883573 forward strand	hs|4q28.1	chr4:124883377-124883436	SPRY1 (+565451)
A_19_P00318487	0.026931	3.80254	up	XLOC_001851	BROAD lincRNAs version v2 (http://www.broadinstitute.org/genome_bio/human_lincrnas/)	hs|2q35	chr2:216583939-216583998	FN1 (-283178), MREG (+294377)
A_19_P00331067	0.0139026	3.79859	down	ESCCAL-96	lincRNA:chr12:7262124-7276175 forward strand	hs|12p13.31	chr12:7275947-7276006	C1RL (-14108), RBP5 (+5489)
A_19_P00322605	0.04368	3.77005	down	XLOC_005465	BROAD lincRNAs version v2 (http://www.broadinstitute.org/genome_bio/human_lincrnas/)	hs|6q23.2	chr6:132467822-132467881	CTGF (-195334), MOXD1 (+254812)
A_19_P00331835	0.0194698	3.75234	down	ESCCAL-97	lincRNA:chr6:40304947-40323847 reverse strand	hs|6p21.2	chr6:40305634-40305575	MOCS1 (-410150), LRFN2 (+249521)
A_19_P00329351	0.0151673	3.74452	down	ESCCAL-98	lincRNA:chr17:73586330-73600280 forward strand	hs|17q25.3	chr17:73599614-73599673	MYO15B (-9411), MYO15B (+15505)
A_19_P00318769	0.00913622	3.73628	up	ESCCAL-99	lincRNA:chr2:102034060-102091165 reverse strand	hs|2q11.2	chr2:102034125-102034066	CREG2 (-30131), RFX8 (+57069)
A_19_P00808440	0.0238094	3.73011	up	ESCCAL-100	lincRNA:chr4:57254043-57259493 forward strand	hs|4q12	chr4:57256713-57256772	AASDH (-3105)
A_19_P00321860	0.0354906	3.72298	up	ESCCAL-101	lincRNA:chr9:132104121-132121810 reverse strand	hs|9q34.11	chr9:132104181-132104122	METTL11A (-284283), PPP2R4 (+230924)
A_19_P00315640	0.00141197	3.71711	up	ESCCAL-102	lincRNA:chr17:6764358-6767235 forward strand	hs|17p13.2	chr17:6766871-6766930	ALOX12 (-132483), TEKT1 (-31841)
A_19_P00809072	0.0408621	3.69572	down	ESCCAL-103	lincRNA:chr20:23121750-23135225 reverse strand	hs|20p11.21	chr20:23128965-23128906	NXT1 (-202437), CD93 (-61959)
A_19_P00808266	0.000400227	3.67765	down	ESCCAL-104	lincRNA:chr10:79686919-79692994 reverse strand	hs|10q22.3	chr10:79689160-79689101	DLG5 (-2783)
A_19_P00807637	0.00213359	3.65344	down	ESCCAL-105	lincRNA:chr11:17364949-17372674 forward strand	hs|11p15.1	chr11:17366661-17366720	B7H6 (-6618), NUCB2 (+68405)
A_19_P00322351	0.00408076	3.64401	up	ESCCAL-106	lincRNA:chr6:21822766-21822969 forward strand	hs|6p22.3	chr6:21822910-21822969	SOX4 (+228968), PRL (+480142)
A_19_P00316256	0.0214529	3.64287	down	ESCCAL-107	lincRNA:chr7:19958635-20042545 reverse strand	hs|7p15.3	chr7:19958774-19958715	TMEM196 (-146341), MACC1 (+298268)
A_19_P00325146	0.0158636	3.60785	down	ESCCAL-108	lincRNA:chr8:143701498-143711723 forward strand	hs|8q24.3	chr8:143710367-143710426	ARC (-14564), JRK (+41004)
A_19_P00318331	0.00223003	3.6074	down	ESCCAL-109	lincRNA:chr11:17370980-17371527 forward strand	hs|11p15.1	chr11:17371468-17371527	B7H6 (-1811)
A_19_P00811620	0.00419822	3.60449	down	ESCCAL-110	lincRNA:chr3:36919496-36994321 forward strand	hs|3p22.2	chr3:36976811-36976870	DCLK3 (-195489), TRANK1 (+9707)
A_19_P00316552	0.000708068	3.58188	up	ESCCAL-111	lincRNA:chr2:111992304-111994467 reverse strand	hs|2q13	chr2:111992876-111992817	BCL2L11 (+114356), ANAPC1 (+648894)
A_19_P00804708	8.71808e-05	3.57584	down	ESCCAL-112	lincRNA:chr20:32861439-32866564 reverse strand	hs|20q11.22	chr20:32864198-32864139	ASIP (+15998), AHCY (+27046)
A_19_P00322526	0.0276573	3.56801	down	ESCCAL-113	lincRNA:chr7:20875049-21061771 forward strand	hs|7p15.3	chr7:21060524-21060583	SP4 (-407135), SP8 (-234046)
A_19_P00323011	0.0038376	3.5674	down	ESCCAL-114	lincRNA:chr17:73592570-73597576 reverse strand	hs|17q25.3	chr17:73592955-73592896	MYO15B (-16129), MYO15B (+8787)
A_19_P00813346	0.0105116	3.56711	down	ESCCAL-115	lincRNA:chr7:12588625-12601850 forward strand	hs|7p21.3	chr7:12593405-12593464	VWDE (-149583), SCIN (-16768)
A_19_P00803440	0.036625	3.56196	down	ESCCAL-116	lincRNA:chr8:130023143-130151518 forward strand	hs|8q24.21	chr8:130128077-130128136	GSDMC (+671027)
A_19_P00332144	0.0248679	3.55901	down	ESCCAL-117	lincRNA:chr6:167382710-167411729 forward strand	hs|6q27	chr6:167410945-167411004	FGFR1OP (-1841)
A_19_P00322855	0.0217726	3.5507	up	ESCCAL-118	lincRNA:chr6:22146709-22147336 reverse strand	hs|6p22.3	chr6:22146890-22146831	PRL (+156221), SOX4 (+552889)
A_19_P00330003	0.0170619	3.52236	down	ESCCAL-119	lincRNA:chr2:47089546-47097038 forward strand	hs|2p21	chr2:47095695-47095754	MCFD2 (+47526), SOCS5 (+169626)
A_19_P00317913	0.00675936	3.51274	down	ESCCAL-120	lincRNA:chr6:29706528-29716826 reverse strand	hs|6p22.1	chr6:29716817-29716758	LOC554223 (-42895), HLA-F (+25671)
A_19_P00316448	0.0274478	3.5074	down	ESCCAL-121	lincRNA:chr15:77969448-78111866 reverse strand	hs|15q25.1	chr15:78088340-78088281	LINGO1 (-163602), TBC1D2B (+281683)
A_19_P00804938	0.0164357	3.50297	down	ESCCAL-122	lincRNA:chr12:2947389-2952675 forward strand	hs|12p13.33	chr12:2952238-2952297	NRIP2 (-8047), FOXM1 (+34053)
A_19_P00317381	0.0439938	3.48679	down	ESCCAL-123	lincRNA:chr2:39745815-39826679 reverse strand	hs|2p22.1	chr2:39815689-39815630	MAP4K3 (-151441), TMEM178 (-77375)
A_19_P00315631	0.00127978	3.4864	down	ESCCAL-124	lincRNA:chr7:19958603-20007776 reverse strand	hs|7p15.3	chr7:19958663-19958604	TMEM196 (-146230), MACC1 (+298379)
A_19_P00319011	0.0226082	3.47236	down	ESCCAL-125	lincRNA:chr2:235358561-235363194 reverse strand	hs|2q37.2	chr2:235358853-235358794	ARL4C (+46869), SPP2 (+399478)
A_19_P00813191	0.00604177	3.47121	down	ESCCAL-126	lincRNA:chr18:20848652-20862402 reverse strand	hs|18q11.2	chr18:20862189-20862130	CABLES1 (+146433), TMEM241 (+155765)
A_19_P00805955	0.0114031	3.46446	down	ESCCAL-127	lincRNA:chr14:58847272-58852597 forward strand	hs|14q23.1	chr14:58851691-58851750	TOMM20L (-10923), ARID4A (+86499)
A_19_P00327811	0.013242	3.46224	down	ESCCAL-128	lincRNA:chr1:41956288-41971088 forward strand	hs|1p34.2	chr1:41970543-41970602	EDN2 (-20229), HIVEP3 (+413923)
A_19_P00811289	0.0442811	3.46217	down	ESCCAL-129	lincRNA:chr14:35749974-35756874 forward strand	hs|14q13.3	chr14:35754643-35754702	PSMA6 (-6901), KIAA0391 (+162897)
A_19_P00326869	0.00999224	3.44176	down	ESCCAL-130	lincRNA:chr8:37183617-37193667 forward strand	hs|8p12	chr8:37189082-37189141	ZNF703 (-364189), KCNU1 (+547270)
A_19_P00812657	0.0205434	3.44031	down	ESCCAL-131	lincRNA:chr5:81707769-81713444 reverse strand	hs|5q14.2	chr5:81707912-81707853	ATP6AP1L (+107130), TMEM167A (+665389)
A_19_P00800463	0.000302131	3.41478	down	ESCCAL-132	lincRNA:chr5:134465126-134592001 forward strand	hs|5q31.1	chr5:134578804-134578863	PITX1 (-208870), H2AFY (+156094)
A_19_P00319133	0.0350589	3.41069	down	XLOC_004558	BROAD lincRNAs version v2 (http://www.broadinstitute.org/genome_bio/human_lincrnas/)	hs|5q31.1	chr5:133827910-133827969	PHF15 (-33858), UBE2B (+121070)
A_19_P00810003	0.00113185	3.40239	down	ESCCAL-133	lincRNA:chrX:10933204-10941554 reverse strand	hs|Xp22.2	chrX:10938458-10938399	HCCS (-190977), MID1 (-86620)
A_19_P00808045	0.0334475	3.3968	down	ESCCAL-134	lincRNA:chr5:66985594-66997719 forward strand	hs|5q13.1	chr5:66992645-66992704	PIK3R1 (-518909), CD180 (-500058)
A_19_P00808877	0.0118555	3.3872	down	ESCCAL-135	lincRNA:chr10:128586385-128592960 forward strand	hs|10q26.2	chr10:128590576-128590635	DOCK1 (-3417)
A_19_P00323845	0.00361759	3.38351	down	ESCCAL-136	lincRNA:chr7:22603825-22723450 reverse strand	hs|7p15.3	chr7:22604451-22604392	IL6 (-162344), STEAP1B (-64521)
A_19_P00321187	0.025295	3.38086	up	ESCCAL-137	lincRNA:chr14:27791205-28142425 reverse strand	hs|14q12	chr14:27791265-27791206	NOVA1 (-724276)
A_19_P00320525	0.0136955	3.37871	up	ESCCAL-138	lincRNA:chr6:21900141-21910822 forward strand	hs|6p22.3	chr6:21909947-21910006	SOX4 (+316005), PRL (+393105)
A_19_P00812410	0.00620696	3.37404	down	ESCCAL-139	lincRNA:chr8:130023143-130151518 reverse strand	hs|8q24.21	chr8:130024478-130024419	GSDMC (+774685)
A_19_P00803821	0.00682843	3.36777	down	ESCCAL-140	lincRNA:chr16:1024899-1030224 forward strand	hs|16p13.3	chr16:1026583-1026642	LMF1 (-5629), SOX8 (-5195)
A_19_P00316455	0.0408686	3.34201	down	ESCCAL-141	lincRNA:chr6:53794843-53862463 forward strand	hs|6p12.1	chr6:53861805-53861864	MLIP (-114410), LRRC1 (+202301)
A_19_P00331796	0.0252424	3.29349	down	ESCCAL-142	lincRNA:chr8:138387843-138421643 forward strand	hs|8q24.23	chr8:138418274-138418333	NONE
A_19_P00321750	0.00970805	3.28657	up	ESCCAL-143	lincRNA:chr6:21666674-22196049 forward strand	hs|6p22.3	chr6:22195641-22195700	PRL (+107411), SOX4 (+601699)
A_19_P00316842	0.0408165	3.27857	down	ESCCAL-144	lincRNA:chr4:8191907-8194788 forward strand	hs|4p16.1	chr4:8194557-8194616	ABLIM2 (-34028), SH3TC1 (-6473)
A_19_P00804497	0.0346922	3.27405	up	ESCCAL-145	lincRNA:chr11:70238327-70244052 reverse strand	hs|11q13.3	chr11:70239732-70239673	CTTN (-4909)
A_19_P00812647	0.0183981	3.26768	down	ESCCAL-146	lincRNA:chr20:58658416-58659320 reverse strand	hs|20q13.33	chr20:58658881-58658822	CDH26 (+125381)
A_19_P00318323	0.00558344	3.2611	up	ESCCAL-147	lincRNA:chr6:22191803-22194614 forward strand	hs|6p22.3	chr6:22194555-22194614	PRL (+108497), SOX4 (+600613)
A_19_P00316454	0.0366809	3.24158	down	ESCCAL-148	lincRNA:chr6:53794843-53862463 forward strand	hs|6p12.1	chr6:53861865-53861924	MLIP (-114350), LRRC1 (+202361)
A_19_P00330122	0.010812	3.23934	up	ESCCAL-149	lincRNA:chr6:21667771-22160821 forward strand	hs|6p22.3	chr6:22148815-22148874	PRL (+154237), SOX4 (+554873)
A_19_P00318932	0.011037	3.2375	down	ESCCAL-150	lincRNA:chrX:110800399-110828053 reverse strand	hs|Xq23	chrX:110806056-110805997	DCX (-151653), ALG13 (-118319)
A_19_P00808120	0.0189594	3.23068	down	ESCCAL-151	lincRNA:chr4:15657202-15695627 forward strand	hs|4p15.32	chr4:15691863-15691922	BST1 (-12680), FAM200B (+8541)
A_19_P00329220	0.000927743	3.23024	down	ESCCAL-152	lincRNA:chr20:56829544-56884069 reverse strand	hs|20q13.32	chr20:56839403-56839344	PMEPA1 (-554343), PPP4R1L (+45121)
A_19_P00809229	0.0232289	3.22775	up	ESCCAL-153	lincRNA:chr2:3172193-3185593 forward strand	hs|2p25.3	chr2:3184448-3184507	MYT1L (-849433), TRAPPC12 (-198968)
A_19_P00800061	0.0110732	3.18465	down	ESCCAL-154	lincRNA:chr1:142840948-142842761 forward strand	hs|1q21.1	chr1:142842526-142842585	PPIAL4G (+925325)
A_19_P00321068	0.0493622	3.17791	up	XLOC_014192	BROAD lincRNAs version v2 (http://www.broadinstitute.org/genome_bio/human_lincrnas/)	hs|22q12.1	chr22:27066259-27066318	CRYBA4 (+48361)
A_19_P00325423	0.00775441	3.17411	down	ESCCAL-155	lincRNA:chr22:24237775-24245560 reverse strand	hs|22q11.23	chr22:24237896-24237837	MIF (+1302), LOC284889 (+3250)
A_19_P00812137	0.0180482	3.1704	down	ESCCAL-156	lincRNA:chr3:183160356-183174856 reverse strand	hs|3q26.33	chr3:183167388-183167329	MCF2L2 (-21504), KLHL6 (+106140)
A_19_P00316321	0.00359097	3.15202	down	ESCCAL-157	lincRNA:chr7:30430500-30443671 reverse strand	hs|7p15.1	chr7:30430608-30430549	NOD1 (+87814), ZNRF2 (+106656)
A_19_P00803039	0.0125386	3.14972	down	XLOC_005849	BROAD lincRNAs version v2 (http://www.broadinstitute.org/genome_bio/human_lincrnas/)	hs|6q23.3	chr6:138145112-138145053	OLIG3 (-329552), TNFAIP3 (-43498)
A_19_P00801766	0.024518	3.14618	down	ESCCAL-158	lincRNA:chr22:18419450-18467225 forward strand	hs|22q11.21	chr22:18449536-18449595	BID (-192135), MICAL3 (+57759)
A_19_P00802720	0.0452753	3.13654	up	ESCCAL-159	lincRNA:chr1:225175977-225243477 forward strand	hs|1q42.13	chr1:225240300-225240359	DNAH14 (+122974), LBR (+375485)
A_19_P00320465	0.032671	3.11134	up	ESCCAL-160	lincRNA:chr2:118147597-118381239 reverse strand	hs|2q14.1	chr2:118147724-118147665	DDX18 (-424560)
A_19_P00322405	0.0306798	3.10171	up	ESCCAL-161	lincRNA:chr18:37270455-37331917 forward strand	hs|18q12.3	chr18:37279540-37279599	NONE
A_19_P00803804	0.0111858	3.0698	up	ESCCAL-162	lincRNA:chr7:93491908-93492346 forward strand	hs|7q21.3	chr7:93492259-93492318	CALCR (-288247), TFPI2 (+27776)
A_19_P00804740	0.0430711	3.05756	down	ESCCAL-163	lincRNA:chr4:16257882-16259621 forward strand	hs|4p15.32	chr4:16259054-16259113	BC010030 (+30798), LDB2 (+641340)
A_19_P00812320	0.0354336	3.05728	down	ESCCAL-164	lincRNA:chr5:133837051-133848098 reverse strand	hs|5q31.1	chr5:133843252-133843193	PHF15 (-18575), UBE2B (+136353)
A_19_P00322183	0.0219209	3.05273	down	XLOC_000515	BROAD lincRNAs version v2 (http://www.broadinstitute.org/genome_bio/human_lincrnas/)	hs|1q32.1	chr1:200384539-200384598	ZNF281 (-5403), KIF14 (+205293)
A_19_P00332332	0.00203062	2.99699	down	ESCCAL-165	lincRNA:chr1:198802352-198907577 forward strand	hs|1q32.1	chr1:198906068-198906127	PTPRC (+297961)
A_19_P00807619	0.0140948	2.9876	down	ESCCAL-166	lincRNA:chr11:86595627-86610277 reverse strand	hs|11q14.2	chr11:86599536-86599477	FZD4 (+66933), PRSS23 (+88016)
A_19_P00801960	0.00920231	2.98226	down	ESCCAL-167	lincRNA:chr6:107185182-107197657 reverse strand	hs|6q21	chr6:107187686-107187627	C6orf203 (-161750), QRSL1 (+110216)
A_19_P00321067	0.0446917	2.97797	up	XLOC_014192	BROAD lincRNAs version v2 (http://www.broadinstitute.org/genome_bio/human_lincrnas/)	hs|22q12.1	chr22:27066322-27066381	CRYBA4 (+48424)
A_19_P00809579	0.017243	2.97725	up	ESCCAL-168	lincRNA:chr5:81963919-82014419 forward strand	hs|5q14.2	chr5:81993653-81993712	TMEM167A (+379589), ATP6AP1L (+392930)
A_19_P00810639	0.0440318	2.97207	up	ESCCAL-169	lincRNA:chr4:83812701-83821676 forward strand	hs|4q21.22	chr4:83819066-83819125	THAP9 (-2741)
A_19_P00316567	0.00480815	2.97061	up	ESCCAL-170	lincRNA:chr6:22146851-22174291 forward strand	hs|6p22.3	chr6:22147399-22147458	PRL (+155653), SOX4 (+553457)
A_19_P00315788	0.038201	2.9688	down	ESCCAL-171	lincRNA:chr9:21930388-21932738 forward strand	hs|9p21.3	chr9:21932065-21932124	CDKN2A (+43037), MTAP (+129460)
A_19_P00801760	0.0150956	2.96872	down	ESCCAL-172	lincRNA:chr5:175597719-175608451 forward strand	hs|5q35.2	chr5:175608291-175608350	THOC3 (-212776), KIAA1191 (+180488)
A_19_P00803697	0.0215377	2.96823	down	XLOC_008632	BROAD lincRNAs version v2 (http://www.broadinstitute.org/genome_bio/human_lincrnas/)	hs|10q26.11	chr10:119250193-119250252	PDZD8 (-115286), EMX2 (-51733)
A_19_P00804710	0.0074473	2.96319	down	ESCCAL-173	lincRNA:chr6:158658787-158724862 forward strand	hs|6q25.3	chr6:158704559-158704618	TULP4 (-29103), GTF2H5 (+115210)
A_19_P00328143	0.0143776	2.95885	down	ESCCAL-174	lincRNA:chr8:103749649-103767499 forward strand	hs|8q22.3	chr8:103766535-103766594	KLF10 (-98582), AZIN1 (+109832)
A_19_P00317324	0.0112802	2.95331	up	ESCCAL-175	lincRNA:chr6:21965726-21967577 forward strand	hs|6p22.3	chr6:21967426-21967485	PRL (+335626), SOX4 (+373484)
A_19_P00329189	0.0118293	2.93903	down	ESCCAL-176	lincRNA:chr4:3676927-3688227 forward strand	hs|4p16.2	chr4:3686134-3686193	LRPAP1 (-151940), ADRA2C (-82132)
A_19_P00319808	0.0241395	2.93063	up	ESCCAL-177	lincRNA:chr1:205404014-205407007 reverse strand	hs|1q32.2	chr1:205404138-205404079	CDK18 (-69575), LEMD1 (-12895)
A_19_P00801843	0.0466597	2.93008	down	ESCCAL-178	lincRNA:chr1:9233849-9234611 forward strand	hs|1p36.22	chr1:9234413-9234472	H6PD (-60420), GPR157 (-45214)
A_19_P00322900	0.0373422	2.92876	up	XLOC_014192	BROAD lincRNAs version v2 (http://www.broadinstitute.org/genome_bio/human_lincrnas/)	hs|22q12.1	chr22:27072279-27072338	CRYBA4 (+54381)
A_19_P00320573	0.00805312	2.90382	down	ESCCAL-179	lincRNA:chr4:8359032-8359781 reverse strand	hs|4p16.1	chr4:8359416-8359357	ACOX3 (+83065), HTRA3 (+87898)
A_19_P00804730	0.00643476	2.89129	down	ESCCAL-180	lincRNA:chr8:96120599-96125999 reverse strand	hs|8q22.1	chr8:96125692-96125633	PLEKHF2 (-20286), C8orf38 (+88449)
A_19_P00803098	0.000802268	2.87661	down	ESCCAL-181	lincRNA:chr1:59259962-59341212 forward strand	hs|1p32.1	chr1:59281002-59281061	FGGY (-481593), JUN (-31247)
A_19_P00322047	0.0370079	2.86487	down	ESCCAL-182	lincRNA:chr16:85385854-85386434 forward strand	hs|16q24.1	chr16:85386329-85386388	KIAA0182 (-260565), KIAA0513 (+324949)
A_19_P00318040	0.0492991	2.86274	down	ESCCAL-183	lincRNA:chr5:73618674-73624122 reverse strand	hs|5q13.3	chr5:73621759-73621700	ENC1 (+315519), RGNEF (+699747)
A_19_P00315524	0.0223499	2.84491	up	XLOC_014192	BROAD lincRNAs version v2 (http://www.broadinstitute.org/genome_bio/human_lincrnas/)	hs|22q12.1	chr22:27066386-27066445	CRYBA4 (+48488)
A_19_P00801412	0.0471928	2.83645	up	ESCCAL-184	lincRNA:chr21:10701104-10873604 forward strand	hs|21p11.1	chr21:10862881-10862940	TEKT4P2 (-894318), TPTE (+128009)
A_19_P00803123	0.0232154	2.8345	up	ESCCAL-185	lincRNA:chr18:966025-1025450 forward strand	hs|18p11.32	chr18:1025210-1025269	ADCYAP1 (+119943)
A_19_P00329699	0.00771387	2.83422	up	ESCCAL-186	lincRNA:chr6:56809416-56818656 reverse strand	hs|6p12.1	chr6:56814267-56814208	DST (-306544), KIAA1586 (-97146)
A_19_P00805514	0.0365639	2.83298	down	ESCCAL-187	lincRNA:chr4:106271676-106286376 reverse strand	hs|4q24	chr4:106284032-106283973	PPA2 (+111224), TET2 (+216161)
A_19_P00811789	0.0136936	2.82471	down	ESCCAL-188	lincRNA:chr8:124617069-124632319 reverse strand	hs|8q24.13	chr8:124629490-124629431	FBXO32 (-75968), ANXA13 (+120186)
A_19_P00802526	0.012637	2.80692	down	ESCCAL-189	lincRNA:chr8:96692149-96730174 forward strand	hs|8q22.1	chr8:96727153-96727212	GDF6 (+445837), PLEKHF2 (+581234)
A_19_P00316977	0.0429228	2.79862	up	ESCCAL-190	lincRNA:chr5:42982464-42991322 forward strand	hs|5p12	chr5:42991142-42991201	SEPP1 (-179148), C5orf39 (+49275)
A_19_P00811042	0.0377131	2.79137	up	ESCCAL-191	lincRNA:chr10:65236069-65272880 forward strand	hs|10q21.3	chr10:65263746-65263805	JMJD1C (-38054), REEP3 (-17347)
A_19_P00315868	0.0201079	2.78894	up	XLOC_010390	BROAD lincRNAs version v2 (http://www.broadinstitute.org/genome_bio/human_lincrnas/)	hs|13q14.3	chr13:50982324-50982383	RNASEH2B (-501460), ST13P4 (+236200)
A_19_P00316166	0.0380171	2.7562	down	ESCCAL-192	lincRNA:chr5:67093172-67095905 forward strand	hs|5q13.1	chr5:67093235-67093294	CD180 (-600648), PIK3R1 (-418319)
A_19_P00331660	0.0101696	2.75606	up	ESCCAL-193	lincRNA:chr17:37717349-37729249 reverse strand	hs|17q21.2	chr17:37719631-37719572	NEUROD2 (+44573), CDK12 (+101863)
A_19_P00807660	0.0120618	2.73986	down	ESCCAL-194	lincRNA:chr12:131829297-131841372 reverse strand	hs|12q24.33	chr12:131834533-131834474	SFSWAP (-361131), GPR133 (+396052)
A_19_P00813544	0.0367772	2.72399	down	XLOC_010897	BROAD lincRNAs version v2 (http://www.broadinstitute.org/genome_bio/human_lincrnas/)	hs|14q31.3	chr14:88491766-88491825	GPR65 (+20328), KCNK10 (+297797)
A_19_P00807049	0.0456549	2.72336	down	ESCCAL-195	lincRNA:chr7:35664275-35671050 forward strand	hs|7p14.2	chr7:35669884-35669943	TBX20 (-376203), HERPUD2 (+64858)
A_19_P00320366	0.0187047	2.71665	up	ESCCAL-196	lincRNA:chr2:56190758-56194077 forward strand	hs|2p16.1	chr2:56193815-56193874	EFEMP1 (-42547)
A_19_P00801088	0.0202107	2.71324	down	ESCCAL-197	lincRNA:chr1:142840948-142842761 forward strand	hs|1q21.1	chr1:142842696-142842755	PPIAL4G (+925155)
A_19_P00808523	0.0148141	2.71062	down	ESCCAL-198	lincRNA:chr15:64753722-64771422 reverse strand	hs|15q22.31	chr15:64753985-64753926	ZNF609 (-37663), TRIP4 (+73953)
A_19_P00329593	0.0460614	2.70045	down	ESCCAL-199	lincRNA:chr8:38616218-38630243 forward strand	hs|8p11.23	chr8:38623612-38623671	RNF5P1 (-164867), TACC1 (-21080)
A_19_P00319377	0.0245451	2.69762	up	ESCCAL-200	lincRNA:chr6:21884038-22056833 forward strand	hs|6p22.3	chr6:21884211-21884270	SOX4 (+290269), PRL (+418841)
A_19_P00319534	0.0384426	2.69275	down	ESCCAL-201	lincRNA:chr15:25230006-25233452 forward strand	hs|15q12	chr15:25233319-25233378	SNURF (+33279), UBE3A (+450826)
A_19_P00317547	0.014206	2.68515	down	XLOC_005849	BROAD lincRNAs version v2 (http://www.broadinstitute.org/genome_bio/human_lincrnas/)	hs|6q23.3	chr6:138144988-138144929	OLIG3 (-329428), TNFAIP3 (-43622)
A_19_P00803789	0.00212534	2.68376	down	ESCCAL-202	lincRNA:chr11:76454377-76485327 forward strand	hs|11q13.5	chr11:76470349-76470408	GUCY2E (-37546), TSKU (-23906)
A_19_P00317553	0.0404012	2.66757	down	XLOC_011803	BROAD lincRNAs version v2 (http://www.broadinstitute.org/genome_bio/human_lincrnas/)	hs|16q24.1	chr16:83967657-83967716	OSGIN1 (-19140), MLYCD (+34957)
A_19_P00800245	0.00289227	2.66498	up	ESCCAL-203	lincRNA:chr12:92378756-92535489 reverse strand	hs|12q22	chr12:92378957-92378898	DCN (-805569), BTG1 (+160745)
A_19_P00323073	0.0188281	2.64101	up	ESCCAL-204	lincRNA:chr6:126693482-126703082 forward strand	hs|6q22.32	chr6:126699769-126699828	RSPO3 (-740249), CENPW (+38546)
A_19_P00329493	0.00689253	2.64059	down	ESCCAL-205	lincRNA:chr4:769425-775573 forward strand	hs|4p16.3	chr4:774836-774895	CPLX1 (+45079), PCGF3 (+75293)
A_19_P00322866	0.00211034	2.63711	down	ESCCAL-206	lincRNA:chr4:15683447-15688768 forward strand	hs|4p15.32	chr4:15686523-15686582	BST1 (-18020), FAM200B (+3201)
A_19_P00808574	0.0179287	2.63575	down	ESCCAL-207	lincRNA:chr12:46111658-46121558 forward strand	hs|12q13.11	chr12:46121228-46121287	ARID2 (-2362)
A_19_P00324760	0.0028672	2.61852	down	ESCCAL-208	lincRNA:chr14:71932922-71967297 reverse strand	hs|14q24.2	chr14:71938805-71938746	SIPA1L1 (-57253), PCNX (+564654)
A_19_P00323923	0.0133444	2.60712	down	ESCCAL-209	lincRNA:chr10:14543419-14555544 reverse strand	hs|10p13	chr10:14549236-14549177	FRMD4A (-176341), CDNF (+330776)
A_19_P00323789	0.0367392	2.60007	up	ESCCAL-210	lincRNA:chr3:156955306-156971329 reverse strand	hs|3q25.31	chr3:156958696-156958637	PTX3 (-195913), CCNL1 (-80185)
A_19_P00330047	0.0123611	2.59754	down	ESCCAL-211	lincRNA:chr1:9206863-9241488 forward strand	hs|1p36.22	chr1:9238116-9238175	H6PD (-56717), GPR157 (-48917)
A_19_P00327810	0.0410934	2.59558	down	ESCCAL-212	lincRNA:chr11:121925615-121949865 forward strand	hs|11q24.1	chr11:121935123-121935182	BLID (+51770), SORL1 (+612241)
A_19_P00323819	0.0353313	2.59115	up	ESCCAL-213	lincRNA:chr1:205404902-205417676 reverse strand	hs|1q32.2	chr1:205407400-205407341	CDK18 (-66313), LEMD1 (-16157)
A_19_P00319518	0.0182418	2.5891	down	ESCCAL-214	lincRNA:chr17:62761200-62761742 reverse strand	hs|17q24.2	chr17:62761696-62761637	SMURF2 (-103281), LOC146880 (+15955)
A_19_P00321748	0.00271943	2.58789	up	ESCCAL-215	lincRNA:chr6:21666674-22196049 forward strand	hs|6p22.3	chr6:22195980-22196039	PRL (+107072), SOX4 (+602038)
A_19_P00810806	0.0156358	2.58776	down	ESCCAL-216	lincRNA:chr13:44717350-44723025 forward strand	hs|13q14.12	chr13:44722084-44722143	ENOX1 (-518501), SERP2 (-225864)
A_19_P00808928	0.0170904	2.58576	down	ESCCAL-217	lincRNA:chr2:74212792-74262017 forward strand	hs|2p13.1	chr2:74258699-74258758	TET3 (-14721), DGUOK (+104776)
A_19_P00802154	0.00246518	2.57633	up	ESCCAL-218	lincRNA:chr6:56749266-56765891 reverse strand	hs|6p12.1	chr6:56765299-56765240	DST (-257576), KIAA1586 (-146114)
A_19_P00319809	0.0177492	2.56903	up	ESCCAL-219	lincRNA:chr1:205404014-205407007 reverse strand	hs|1q32.2	chr1:205404198-205404139	CDK18 (-69515), LEMD1 (-12955)
A_19_P00316504	0.0356297	2.56859	down	ESCCAL-220	lincRNA:chr20:11246761-11249483 forward strand	hs|20p12.2	chr20:11246912-11246971	JAG1 (-592248)
A_19_P00801328	0.00916809	2.56806	down	ESCCAL-221	lincRNA:chr21:46710197-46720497 reverse strand	hs|21q22.3	chr21:46711436-46711377	POFUT2 (-3596)
A_19_P00326743	0.0157032	2.56584	down	ESCCAL-222	lincRNA:chr2:32237771-32245946 forward strand	hs|2p22.3	chr2:32238452-32238511	MEMO1 (-2784)
A_19_P00326445	0.0437611	2.56392	up	ESCCAL-223	lincRNA:chr1:85980187-86041537 reverse strand	hs|1p22.3	chr1:85999625-85999566	DDAH1 (-68707), CYR61 (-46848)
A_19_P00805936	0.0117946	2.55943	down	ESCCAL-224	lincRNA:chr2:139144855-139211555 forward strand	hs|2q22.1	chr2:139204682-139204741	SPOPL (-54638), HNMT (+482904)
A_19_P00330206	0.00245203	2.55907	down	ESCCAL-225	lincRNA:chr6:44006347-44033347 reverse strand	hs|6p21.1	chr6:44007200-44007141	MRPL14 (+88020), VEGFA (+269225)
A_19_P00317819	0.0433082	2.55805	up	XLOC_002977	BROAD lincRNAs version v2 (http://www.broadinstitute.org/genome_bio/human_lincrnas/)	hs|3q29	chr3:193965551-193965610	CPN2 (+106476), HES1 (+111650)
A_19_P00317435	0.0116525	2.55605	up	ESCCAL-226	lincRNA:chr6:22186573-22186982 forward strand	hs|6p22.3	chr6:22186896-22186955	PRL (+116156), SOX4 (+592954)
A_19_P00320268	0.00990676	2.53979	up	ESCCAL-227	lincRNA:chr8:37330594-37411701 reverse strand	hs|8p12	chr8:37386674-37386615	ZNF703 (-166656), KCNU1 (+744803)
A_19_P00322477	0.0444472	2.53904	up	ESCCAL-228	lincRNA:chr3:185000779-185009691 reverse strand	hs|3q27.1	chr3:185009580-185009521	MAP3K13 (-71285), EHHADH (-37665)
A_19_P00316362	0.00667664	2.53804	down	ESCCAL-229	lincRNA:chr4:120400703-120402090 forward strand	hs|4q26	chr4:120401925-120401984	FABP2 (-158639), AX746903 (-146990)
A_19_P00802200	0.0326403	2.52816	down	ESCCAL-230	lincRNA:chr8:43518693-43531493 forward strand	hs|8p11.1	chr8:43529208-43529267	HGSNAT (+533646)
A_19_P00810945	0.0184836	2.52474	down	ESCCAL-231	lincRNA:chr16:88373799-88386199 reverse strand	hs|16q24.3	chr16:88381397-88381338	ZNF469 (-112511), BANP (+396330)
A_19_P00326152	0.00994857	2.52289	down	ESCCAL-232	lincRNA:chr12:131245647-131252097 reverse strand	hs|12q24.33	chr12:131245982-131245923	RIMBP2 (-243491), STX2 (+77858)
A_19_P00327658	0.00877949	2.51473	down	ESCCAL-233	lincRNA:chr14:55556897-55571747 reverse strand	hs|14q22.3	chr14:55564042-55563983	LGALS3 (-31922), SOCS4 (+70169)
A_19_P00804592	0.00997662	2.51214	down	ESCCAL-234	lincRNA:chr3:194190336-194206786 forward strand	hs|3q29	chr3:194203298-194203357	ATP13A3 (-14360), TMEM44 (+150822)
A_19_P00804232	0.00861159	2.50914	down	ESCCAL-235	lincRNA:chr13:30884300-30899600 forward strand	hs|13q12.3	chr13:30890709-30890768	KATNAL1 (-9576), HMGB1 (+149342)
A_19_P00802201	0.0156125	2.49795	up	ESCCAL-236	lincRNA:chr7:7928975-7996750 reverse strand	hs|7p21.3	chr7:7949008-7948949	RPA3 (-190741), GLCCI1 (-59444)
A_19_P00324844	0.0230429	2.4889	up	ESCCAL-237	lincRNA:chr6:126693482-126703082 forward strand	hs|6q22.32	chr6:126699829-126699888	RSPO3 (-740189), CENPW (+38606)
A_19_P00327012	0.00929364	2.47882	down	ESCCAL-238	lincRNA:chr1:30142313-30152488 forward strand	hs|1p35.2	chr1:30142398-30142457	PTPRU (+579400)
A_19_P00803000	0.0035783	2.47429	up	ESCCAL-239	lincRNA:chr8:104254399-104295074 reverse strand	hs|8q22.3	chr8:104258684-104258625	FZD6 (-52006), BAALC (+105734)
A_19_P00324142	0.0221955	2.47005	down	ESCCAL-240	lincRNA:chr13:20391275-20404425 forward strand	hs|13q12.11	chr13:20397506-20397565	PSPC1 (-40377), ZMYM5 (+40240)
A_19_P00330643	0.0047831	2.46496	up	ESCCAL-241	lincRNA:chr3:194190336-194206820 reverse strand	hs|3q29	chr3:194197227-194197168	ATP13A3 (-8230), TMEM44 (+156952)
A_19_P00322129	0.00760946	2.46492	up	ESCCAL-242	lincRNA:chr22:48027537-48057502 forward strand	hs|22q13.32	chr22:48057366-48057425	FAM19A5 (-827892), TBC1D22A (+898878)
A_19_P00316734	0.0215756	2.46356	down	ESCCAL-243	lincRNA:chr8:129001429-129082518 reverse strand	hs|8q24.21	chr8:129060753-129060694	MYC (+312409)
A_19_P00329850	0.00899763	2.45857	down	ESCCAL-244	lincRNA:chr2:129348030-129361848 forward strand	hs|2q14.3	chr2:129361700-129361759	HS6ST1 (-285559)
A_19_P00808462	0.00744434	2.45479	down	ESCCAL-245	lincRNA:chr5:176744094-176753119 reverse strand	hs|5q35.3	chr5:176747628-176747569	MXD3 (-8307), LMAN2 (+31286)
A_19_P00316493	0.00999735	2.44875	down	XLOC_001946	BROAD lincRNAs version v2 (http://www.broadinstitute.org/genome_bio/human_lincrnas/)	hs|2p25.3	chr2:2840772-2840713	TRAPPC12 (-542703), MYT1L (-505698)
A_19_P00803868	0.0187036	2.44318	down	ESCCAL-246	lincRNA:chr1:98460171-98460970 reverse strand	hs|1p21.3	chr1:98460305-98460246	SNX7 (-666960), DPYD (-73661)
A_19_P00321399	0.00733651	2.43962	down	XLOC_004598	BROAD lincRNAs version v2 (http://www.broadinstitute.org/genome_bio/human_lincrnas/)	hs|5q33.1	chr5:148795205-148795264	IL17B (-36397), CSNK1A1 (+135772)
A_19_P00319829	0.0190397	2.4294	down	ESCCAL-247	lincRNA:chr3:197305472-197342531 reverse strand	hs|3q29	chr3:197305532-197305473	BDH1 (-22645), KIAA0226 (+158270)
A_19_P00808285	0.043145	2.42922	down	XLOC_005583	BROAD lincRNAs version v2 (http://www.broadinstitute.org/genome_bio/human_lincrnas/)	hs|6p25.2	chr6:3183528-3183469	TUBB2A (-25716), TUBB2B (+44469)
A_19_P00808117	0.0165015	2.42479	down	ESCCAL-248	lincRNA:chr6:113682343-113682601 reverse strand	hs|6q21	chr6:113682463-113682404	MARCKS (-496093)
A_19_P00317775	0.0164423	2.42327	down	XLOC_011185	BROAD lincRNAs version v2 (http://www.broadinstitute.org/genome_bio/human_lincrnas/)	hs|15q12	chr15:25367338-25367397	SNURF (+167298), UBE3A (+316807)
A_19_P00330641	0.0357496	2.41842	down	ESCCAL-249	lincRNA:chr9:21491050-21597675 forward strand	hs|9p21.3	chr9:21567075-21567134	MTAP (-235530), IFNE (-84793)
A_19_P00322411	0.0116783	2.41448	down	ESCCAL-250	lincRNA:chr6:6794382-6801404 reverse strand	hs|6p25.1	chr6:6799089-6799030	RREB1 (-309026), LY86 (+210126)
A_19_P00807944	0.000660849	2.41221	up	ESCCAL-251	lincRNA:chr10:47000944-47006919 forward strand	hs|10q11.22	chr10:47006571-47006630	PPYR1 (-76933), SYT15 (-36000)
A_19_P00322829	0.008629	2.40911	down	ESCCAL-252	lincRNA:chrX:53707005-53710958 reverse strand	hs|Xp11.22	chrX:53710944-53710885	HSD17B10 (-249592), HUWE1 (+2758)
A_19_P00318718	0.0176602	2.40453	down	ESCCAL-253	lincRNA:chr4:8357036-8359103 reverse strand	hs|4p16.1	chr4:8357097-8357038	ACOX3 (+85384), HTRA3 (+85579)
A_19_P00810664	0.0110609	2.39647	down	ESCCAL-254	lincRNA:chr11:126218440-126224015 forward strand	hs|11q24.2	chr11:126219961-126220020	ST3GAL4 (-5549), DCPS (+46344)
A_19_P00323906	0.00363522	2.39482	down	ESCCAL-255	lincRNA:chr12:123599022-123607440 forward strand	hs|12q24.31	chr12:123607056-123607115	PITPNM2 (-12051), MPHOSPH9 (+99356)
A_19_P00327057	0.0149535	2.3883	down	ESCCAL-256	lincRNA:chr11:117668490-117680359 reverse strand	hs|11q23.3	chr11:117671760-117671701	DSCAML1 (-3755)
A_19_P00316284	0.0322425	2.38812	down	XLOC_004598	BROAD lincRNAs version v2 (http://www.broadinstitute.org/genome_bio/human_lincrnas/)	hs|5q33.1	chr5:148791991-148792050	IL17B (-33183), CSNK1A1 (+138986)
A_19_P00807433	0.0227487	2.38634	down	ESCCAL-257	lincRNA:chr6:29983946-29992471 forward strand	hs|6p21.33	chr6:29988410-29988469	ZNRD1 (-40596), HLA-J (+14223)
A_19_P00805049	0.0490901	2.38325	down	ESCCAL-258	lincRNA:chr16:79681149-79694774 reverse strand	hs|16q23.2	chr16:79690006-79689947	DYNLRB2 (-884877), MAF (-55355)
A_19_P00316921	0.0131943	2.37736	up	ESCCAL-259	lincRNA:chr6:22056689-22111131 forward strand	hs|6p22.3	chr6:22063410-22063469	PRL (+239642), SOX4 (+469468)
A_19_P00331623	0.00365453	2.37446	down	XLOC_008185	BROAD lincRNAs version v2 (http://www.broadinstitute.org/genome_bio/human_lincrnas/)	hs|Xq13.2	chrX:73040625-73040566	ZCCHC13 (-483429), CHIC1 (+257612)
A_19_P00316235	0.000570691	2.36579	down	ESCCAL-260	lincRNA:chr5:131806278-131808704 forward strand	hs|5q31.1	chr5:131808618-131808677	IRF1 (+17817), SLC22A5 (+103247)
A_19_P00323054	0.012239	2.36264	down	ESCCAL-261	lincRNA:chr18:74178337-74202985 reverse strand	hs|18q23	chr18:74179661-74179602	ZNF516 (+27514)
A_19_P00320034	0.0209472	2.36126	down	ESCCAL-262	lincRNA:chr6:2273482-2284008 reverse strand	hs|6p25.3	chr6:2283830-2283771	GMDS (-37933), MYLK4 (+467353)
A_19_P00807182	0.0155225	2.35943	up	ESCCAL-263	lincRNA:chr7:63733515-63843015 reverse strand	hs|7q11.21	chr7:63768049-63767990	ZNF736 (-5166), ZNF679 (+79168)
A_19_P00329511	0.0252244	2.3574	down	XLOC_008185	BROAD lincRNAs version v2 (http://www.broadinstitute.org/genome_bio/human_lincrnas/)	hs|Xq13.2	chrX:73040747-73040688	ZCCHC13 (-483307), CHIC1 (+257734)
A_19_P00801761	0.0136842	2.35658	up	ESCCAL-264	lincRNA:chr9:37579075-37586275 reverse strand	hs|9p13.2	chr9:37582742-37582683	FBXO10 (-6463), TOMM5 (+9923)
A_19_P00323081	7.88046e-05	2.35168	down	ESCCAL-265	lincRNA:chr3:156477781-156539131 forward strand	hs|3q25.31	chr3:156535010-156535069	TIPARP (+140587), CCNL1 (+343442)
A_19_P00330464	0.0373656	2.33966	up	ESCCAL-266 (HOTAIR)	lincRNA:chr12:54356229-54357908 reverse strand	hs|12q13.2	chr12:54356478-54356419	HOXC11 (-10461), HOXC12 (+7735)
A_19_P00802890	0.0239916	2.33901	down	ESCCAL-267	lincRNA:chr8:101925424-101930749 forward strand	hs|8q22.3	chr8:101928348-101928407	PABPC1 (-194063), YWHAZ (+36843)
A_19_P00327549	0.0243431	2.33736	down	ESCCAL-268	lincRNA:chr3:136790035-136808485 reverse strand	hs|3q22.2	chr3:136792495-136792436	SOX14 (-690668), IL20RB (+115759)
A_19_P00321962	0.00960906	2.3371	down	ESCCAL-269	lincRNA:chr21:18003757-18013002 forward strand	hs|21q21.1	chr21:18012873-18012932	CXADR (-872321), USP25 (+910407)
A_19_P00322407	0.0168214	2.33365	down	ESCCAL-270	lincRNA:chr6:147163036-147237021 reverse strand	hs|6q24.3	chr6:147163096-147163037	STXBP5 (-362427), C6orf103 (+242931)
A_19_P00332116	0.0374251	2.32628	down	ESCCAL-271	lincRNA:chr11:61234324-61244199 forward strand	hs|11q12.2	chr11:61242292-61242351	SDHAF2 (+44725), SYT7 (+106022)
A_19_P00318719	0.0141514	2.32449	down	ESCCAL-272	lincRNA:chr4:8357036-8359103 reverse strand	hs|4p16.1	chr4:8357157-8357098	ACOX3 (+85324), HTRA3 (+85639)
A_19_P00323600	0.0250225	2.32012	down	ESCCAL-273	lincRNA:chr3:63087310-63110960 reverse strand	hs|3p14.2	chr3:63098195-63098136	CADPS (-237102), SYNPR (-165748)
A_19_P00805336	0.00993053	2.312	down	ESCCAL-274	lincRNA:chr15:56580983-56592133 forward strand	hs|15q22.1	chr15:56587769-56587828	RFX7 (-52316), MNS1 (+169536)
A_19_P00803948	0.0218654	2.30821	down	ESCCAL-275	lincRNA:chr14:71175122-71180872 forward strand	hs|14q24.2	chr14:71180731-71180790	TTC9 (+72257), MAP3K9 (+95127)
A_19_P00319337	0.0228089	2.30627	down	ESCCAL-276	lincRNA:chr6:170190416-170202969 forward strand	hs|6q27	chr6:170201972-170202031	C6orf70 (+50281), DLL1 (+397695)
A_19_P00801172	0.0339466	2.29947	down	ESCCAL-277	lincRNA:chr2:43245446-43415321 forward strand	hs|2p21	chr2:43320549-43320608	HAAO (-300828), ZFP36L2 (+133166)
A_19_P00810012	0.0155315	2.29932	down	ESCCAL-278	lincRNA:chr4:8357101-8357609 reverse strand	hs|4p16.1	chr4:8357162-8357103	ACOX3 (+85319), HTRA3 (+85644)
A_19_P00330702	0.0209937	2.29567	down	ESCCAL-279	lincRNA:chr4:24517527-24528051 forward strand	hs|4p15.2	chr4:24527742-24527801	PPARGC1A (-636072), DHX15 (+58412)
A_19_P00811611	0.00914326	2.28955	down	ESCCAL-280	lincRNA:chr6:41014072-41020197 reverse strand	hs|6p21.1	chr6:41017785-41017726	APOBEC2 (-3184)
A_19_P00801466	0.0103826	2.28706	up	ESCCAL-281	lincRNA:chr13:40648600-40655200 reverse strand	hs|13q14.11	chr13:40653542-40653483	COG6 (+423749), FOXO1 (+587221)
A_19_P00802339	0.00137303	2.28609	up	ESCCAL-282	lincRNA:chr20:57402102-57402646 forward strand	hs|20q13.32	chr20:57402426-57402485	GNAS (-12339), NPEPL1 (+134594)
A_19_P00802301	0.0284295	2.28575	down	ESCCAL-283	lincRNA:chr4:125511350-125532750 reverse strand	hs|4q28.1	chr4:125528726-125528667	FAT4 (-708870)
A_19_P00323471	0.0147051	2.28479	down	ESCCAL-284	lincRNA:chr10:44829994-44851569 forward strand	hs|10q11.21	chr10:44848467-44848526	HNRNPA3P1 (-562632), CXCL12 (+32048)
A_19_P00807794	0.0239607	2.28328	down	ESCCAL-285	lincRNA:chr5:93440069-93451144 forward strand	hs|5q15	chr5:93443675-93443734	POU5F2 (-366396), FAM172A (+3699)
A_19_P00327388	0.01886	2.28223	down	ESCCAL-286	lincRNA:chr3:162445031-162502906 reverse strand	hs|3q26.1	chr3:162501493-162501434	NONE
A_19_P00807452	0.0387054	2.28046	up	ESCCAL-287	lincRNA:chr14:53687975-53843100 forward strand	hs|14q22.2	chr14:53807711-53807770	DDHD1 (-187695), BMP4 (+613529)
A_19_P00316525	0.0305188	2.2749	up	ESCCAL-288	lincRNA:chr2:27788931-27790011 reverse strand	hs|2p23.2	chr2:27789661-27789602	ZNF512 (-16261), GCKR (+69926)
A_19_P00803803	0.0413731	2.26605	up	ESCCAL-289	lincRNA:chr6:56709666-56716191 reverse strand	hs|6p12.1	chr6:56714352-56714293	DST (-206629), KIAA1586 (-197061)
A_19_P00806605	0.000628835	2.26499	up	ESCCAL-290	lincRNA:chr12:46826133-46974783 forward strand	hs|12q13.11	chr12:46953715-46953774	SLC38A2 (-187100), SLC38A4 (+266035)
A_19_P00800579	0.0193025	2.26257	down	ESCCAL-291	lincRNA:chr19:37493217-37493673 forward strand	hs|19q13.11	chr19:37493253-37493312	ZNF420 (-76099), ZNF568 (+86052)
A_19_P00322919	0.00187918	2.25573	up	ESCCAL-292	lincRNA:chr6:22181638-22194615 reverse strand	hs|6p22.3	chr6:22194397-22194338	PRL (+108714), SOX4 (+600396)
A_19_P00331954	0.030673	2.25033	down	ESCCAL-293	lincRNA:chr6:109006232-109021407 reverse strand	hs|6q21	chr6:109007508-109007449	ARMC2 (-162140), FOXO3 (+125410)
A_19_P00322705	0.0382655	2.24699	up	XLOC_014192	BROAD lincRNAs version v2 (http://www.broadinstitute.org/genome_bio/human_lincrnas/)	hs|22q12.1	chr22:27064312-27064371	CRYBA4 (+46414)
A_19_P00317360	0.0102399	2.24585	up	ESCCAL-294	lincRNA:chr3:130569543-130575125 forward strand	hs|3q21.3	chr3:130569653-130569712	ATP2C1 (+314)
A_19_P00802438	0.0376405	2.24348	down	ESCCAL-295	lincRNA:chr4:26806777-26850102 forward strand	hs|4p15.2	chr4:26834678-26834737	STIM2 (-27605), TBC1D19 (+249162)
A_19_P00316276	0.00869706	2.24135	up	ESCCAL-296	lincRNA:chr9:132104133-132109756 reverse strand	hs|9q34.11	chr9:132104193-132104134	METTL11A (-284271), PPP2R4 (+230936)
A_19_P00320436	0.0473884	2.23867	down	ESCCAL-297	lincRNA:chr5:71870020-71876804 forward strand	hs|5q13.2	chr5:71870207-71870266	TNPO1 (-273693), ZNF366 (-66988)
A_19_P00316135	0.0362719	2.23203	down	ESCCAL-298	lincRNA:chr2:38358246-38408993 forward strand	hs|2p22.1	chr2:38408930-38408989	CYP1B1 (-105637), ATL2 (+195472)
A_19_P00807411	0.0161078	2.22586	down	ESCCAL-299	lincRNA:chr5:63667694-63677269 forward strand	hs|5q12.2	chr5:63668314-63668373	RGS7BP (-134108), RNF180 (+206673)
A_19_P00330583	0.0176542	2.22217	down	ESCCAL-300	lincRNA:chr1:180915452-180923811 reverse strand	hs|1q25.3	chr1:180918852-180918793	STX6 (+73223), XPR1 (+317677)
A_19_P00327972	0.0395077	2.22151	down	ESCCAL-301	lincRNA:chr14:101294997-101335522 reverse strand	hs|14q32.31	chr14:101295417-101295358	MEG3 (-2370)
A_19_P00812841	0.00526073	2.22012	down	ESCCAL-302	lincRNA:chr6:72017387-72024304 forward strand	hs|6q13	chr6:72017824-72017883	RIMS1 (-578796), OGFRL1 (+19377)
A_19_P00322479	0.0473169	2.2146	up	XLOC_002142	BROAD lincRNAs version v2 (http://www.broadinstitute.org/genome_bio/human_lincrnas/)	hs|2p14	chr2:67402800-67402741	ETAA1 (-221671), MEIS1 (+740239)
A_19_P00813095	0.026053	2.2132	down	ESCCAL-303	lincRNA:chr18:53693827-53705002 forward strand	hs|18q21.31	chr18:53697120-53697179	TCF4 (-393962), TXNL1 (+609120)
A_19_P00802049	0.00977698	2.20739	up	ESCCAL-304	lincRNA:chr14:28091410-28141510 reverse strand	hs|14q12	chr14:28103739-28103680	NONE
A_19_P00318181	0.0444566	2.20716	up	ESCCAL-305	lincRNA:chr13:41025071-41055143 reverse strand	hs|13q14.11	chr13:41031973-41031914	FOXO1 (+208790), COG6 (+802180)
A_19_P00320759	0.021692	2.20043	up	XLOC_004803	BROAD lincRNAs version v2 (http://www.broadinstitute.org/genome_bio/human_lincrnas/)	hs|5p12	chr5:42991004-42990945	SEPP1 (-178951), C5orf39 (+49472)
A_19_P00802874	0.0144042	2.19932	down	ESCCAL-306	lincRNA:chr20:23121750-23135225 forward strand	hs|20p11.21	chr20:23131872-23131931	NXT1 (-199471), CD93 (-64925)
A_19_P00812672	0.0346201	2.19585	down	ESCCAL-307	lincRNA:chr11:14933324-14978424 forward strand	hs|11p15.2	chr11:14975924-14975983	CYP2R1 (-62203), CALCA (+17878)
A_19_P00328197	0.00295782	2.19575	down	ESCCAL-308	lincRNA:chr5:131685601-131704051 forward strand	hs|5q31.1	chr5:131701653-131701712	SLC22A5 (-3718)
A_19_P00319568	0.0346527	2.19316	down	ESCCAL-309	lincRNA:chr18:53744938-53763545 reverse strand	hs|18q21.31	chr18:53745438-53745379	TCF4 (-442221), TXNL1 (+560861)
A_19_P00800114	0.000820999	2.18998	down	ESCCAL-310	lincRNA:chr4:79561826-79587351 reverse strand	hs|4q21.21	chr4:79569973-79569914	BMP2K (-127588), ANXA3 (+97202)
A_19_P00801408	0.0130435	2.18941	down	ESCCAL-311	lincRNA:chr7:128523814-128529589 forward strand	hs|7q32.1	chr7:128525266-128525325	ATP6V1F (+22439), KCP (+25477)
A_19_P00811251	0.0343875	2.18442	up	ESCCAL-312	lincRNA:chr8:118761334-118761831 reverse strand	hs|8q24.11	chr8:118761516-118761457	MED30 (+228522), EXT1 (+362571)
A_19_P00320798	0.0468708	2.18181	up	ESCCAL-313	lincRNA:chr1:86019964-86020757 reverse strand	hs|1p22.3	chr1:86020041-86019982	DDAH1 (-89123), CYR61 (-26432)
A_19_P00805339	0.0102003	2.17942	up	XLOC_000915	BROAD lincRNAs version v2 (http://www.broadinstitute.org/genome_bio/human_lincrnas/)	hs|1p22.2	chr1:91295528-91295469	BARHL2 (-112705), ZNF644 (+192313)
A_19_P00324604	0.0418432	2.17858	up	ESCCAL-314	lincRNA:chr17:21433357-21449982 reverse strand	hs|17p11.2	chr17:21434471-21434412	MTRNR2L1 (-587995), KCNJ18 (+125994)
A_19_P00810205	0.0192199	2.17413	up	ESCCAL-315	lincRNA:chr7:7928975-7996750 reverse strand	hs|7p21.3	chr7:7949226-7949167	RPA3 (-190959), GLCCI1 (-59226)
A_19_P00331454	0.026593	2.17272	down	ESCCAL-316	lincRNA:chr11:120050990-120061540 reverse strand	hs|11q23.3	chr11:120052225-120052166	POU2F3 (-55153), TRIM29 (-43333)
A_19_P00325094	0.0391339	2.17144	up	ESCCAL-317	lincRNA:chr1:181063077-181073127 forward strand	hs|1q25.3	chr1:181066093-181066152	CACNA1E (-386563), MR1 (+63562)
A_19_P00800509	0.0177046	2.16726	down	ESCCAL-318	lincRNA:chr5:10217425-10223699 forward strand	hs|5p15.2	chr5:10222999-10223058	TAS2R1 (-592566), FAM173B (+26985)
A_19_P00810401	0.00691269	2.1669	up	ESCCAL-319	lincRNA:chr1:180929852-180942077 reverse strand	hs|1q25.3	chr1:180933764-180933705	STX6 (+58311), XPR1 (+332589)
A_19_P00813593	0.0109766	2.16513	up	XLOC_002408	BROAD lincRNAs version v2 (http://www.broadinstitute.org/genome_bio/human_lincrnas/)	hs|2q31.1	chr2:177494484-177494425	HNRNPA3 (-582967), MTX2 (+360332)
A_19_P00316257	0.018297	2.1644	down	ESCCAL-320	lincRNA:chr7:19958635-20042545 reverse strand	hs|7p15.3	chr7:19958862-19958803	TMEM196 (-146429), MACC1 (+298180)
A_19_P00801971	0.00802346	2.1588	up	ESCCAL-321	lincRNA:chr14:96561398-96561831 forward strand	hs|14q32.2	chr14:96561539-96561598	BDKRB2 (-109566), C14orf132 (+55908)
A_19_P00810009	0.0447735	2.15615	down	ESCCAL-322	lincRNA:chr15:25240607-25246007 forward strand	hs|15q12	chr15:25245423-25245482	SNURF (+45383), UBE3A (+438722)
A_19_P00327801	0.0424671	2.15334	down	ESCCAL-323	lincRNA:chr14:96517372-96527972 forward strand	hs|14q32.2	chr14:96523224-96523283	BDKRB2 (-147881), C14orf132 (+17593)
A_19_P00809867	0.0178697	2.14579	down	ESCCAL-324	lincRNA:chr18:48607527-48612752 reverse strand	hs|18q21.2	chr18:48610534-48610475	SMAD4 (+53922), MEX3C (+113546)
A_19_P00320259	0.0215519	2.14511	down	ESCCAL-325	lincRNA:chr4:53588784-53617753 reverse strand	hs|4q12	chr4:53617748-53617689	ERVMER34-1 (+88)
A_19_P00320841	0.0443466	2.1446	up	ESCCAL-326	lincRNA:chr17:21434064-21435857 reverse strand	hs|17p11.2	chr17:21434531-21434472	MTRNR2L1 (-587935), KCNJ18 (+126054)
A_19_P00806249	0.0160457	2.1408	up	ESCCAL-327	lincRNA:chr1:89874262-89947412 reverse strand	hs|1p22.2	chr1:89887111-89887052	LRRC8B (-103315), GBP6 (+57646)
A_19_P00319714	0.0346356	2.13958	down	ESCCAL-328	lincRNA:chr13:50656384-50681354 forward strand	hs|13q14.3	chr13:50681292-50681351	ST13P4 (-64832), KCNRG (+91932)
A_19_P00318904	0.0181465	2.13637	down	ESCCAL-329	lincRNA:chr7:143193413-143193865 forward strand	hs|7q35	chr7:143193658-143193717	TAS2R41 (+18722), CTAGE6P (+261155)
A_19_P00322932	6.8909e-06	2.13331	up	ESCCAL-330	lincRNA:chr9:132251329-132265784 forward strand	hs|9q34.11	chr9:132251372-132251431	METTL11A (-137033), PPP2R4 (+378174)
A_19_P00321383	0.00285999	2.13169	down	XLOC_006253	BROAD lincRNAs version v2 (http://www.broadinstitute.org/genome_bio/human_lincrnas/)	hs|7q32.3	chr7:130612595-130612654	MKLN1 (-399970), KLF14 (-193737)
A_19_P00328265	0.0145764	2.13005	down	ESCCAL-331	lincRNA:chr4:115399526-115413226 reverse strand	hs|4q26	chr4:115406145-115406086	ARSJ (-505238), UGT8 (-113495)
A_19_P00801973	0.0446147	2.12993	down	ESCCAL-332	lincRNA:chr3:9387975-9397375 reverse strand	hs|3p25.3	chr3:9390331-9390272	SRGAP3 (-98991), THUMPD3 (-14415)
A_19_P00804357	0.00306041	2.12834	down	ESCCAL-333	lincRNA:chr6:72017387-72024304 forward strand	hs|6q13	chr6:72018004-72018063	RIMS1 (-578616), OGFRL1 (+19557)
A_19_P00806511	0.0350722	2.11864	down	ESCCAL-334	lincRNA:chr4:23771777-23778877 forward strand	hs|4p15.2	chr4:23776941-23777000	PPARGC1A (+114729)
A_19_P00812965	0.00704788	2.11855	down	ESCCAL-335	lincRNA:chrX:106895444-106901544 forward strand	hs|Xq22.3	chrX:106896953-106897012	PRPS1 (+25329), TSC22D3 (+122034)
A_19_P00803566	0.0437158	2.11234	down	ESCCAL-336	lincRNA:chr13:29222100-29228575 forward strand	hs|13q12.3	chr13:29222849-29222908	FLT1 (-153614), POMP (-10262)
A_19_P00319323	0.0410604	2.10529	down	ESCCAL-337	lincRNA:chr3:171506370-171528740 reverse strand	hs|3q26.2	chr3:171506465-171506406	TNIK (-328239), PLD1 (+22068)
A_19_P00813242	0.000228274	2.10504	down	ESCCAL-338	lincRNA:chr12:31984858-32106908 reverse strand	hs|12p11.21	chr12:32101291-32101232	BICD1 (-158923), H3F3C (-156087)
A_19_P00326887	0.0208645	2.10369	down	ESCCAL-339	lincRNA:chr8:130695693-130741043 forward strand	hs|8q24.21	chr8:130738185-130738244	GSDMC (+60919)
A_19_P00320970	0.031567	2.10005	down	XLOC_005020	BROAD lincRNAs version v2 (http://www.broadinstitute.org/genome_bio/human_lincrnas/)	hs|5q31.3	chr5:139121137-139121078	PSD2 (-54298), CXXC5 (+92807)
A_19_P00329742	0.0166567	2.09859	down	ESCCAL-340	lincRNA:chr9:21901475-21910700 forward strand	hs|9p21.3	chr9:21904476-21904535	CDKN2A (+70626), MTAP (+101871)
A_19_P00332091	0.000531372	2.09025	down	ESCCAL-341	lincRNA:chr4:79561826-79587351 reverse strand	hs|4q21.21	chr4:79570027-79569968	BMP2K (-127534), ANXA3 (+97256)
A_19_P00317052	0.03295	2.08859	up	ESCCAL-342	lincRNA:chr17:78301614-78306077 forward strand	hs|17q25.3	chr17:78302158-78302217	ENDOV (-86779), RNF213 (+67521)
A_19_P00808846	0.00663227	2.08509	down	ESCCAL-343	lincRNA:chr21:17992729-18010729 forward strand	hs|21q21.1	chr21:18003158-18003217	CXADR (-882036), USP25 (+900692)
A_19_P00319963	0.0287236	2.08412	down	XLOC_005297	BROAD lincRNAs version v2 (http://www.broadinstitute.org/genome_bio/human_lincrnas/)	hs|6p21.1	chr6:44042250-44042309	MRPL14 (+52911), VEGFA (+304334)
A_19_P00813545	0.0234195	2.08383	up	ESCCAL-344	lincRNA:chr2:37327291-37327559 forward strand	hs|2p22.2	chr2:37327299-37327358	CCDC75 (+15735), EIF2AK2 (+56861)
A_19_P00321578	0.0477567	2.07314	down	ESCCAL-345	lincRNA:chr3:171507069-171528235 reverse strand	hs|3q26.2	chr3:171507311-171507252	TNIK (-329085), PLD1 (+21222)
A_19_P00806737	0.0496674	2.07307	down	ESCCAL-346	lincRNA:chr9:21879775-21938825 forward strand	hs|9p21.3	chr9:21935882-21935941	CDKN2A (+39220), MTAP (+133277)
A_19_P00324217	0.00224518	2.07017	down	ESCCAL-347	lincRNA:chr6:113672332-113690598 reverse strand	hs|6q21	chr6:113682501-113682442	MARCKS (-496055)
A_19_P00804039	0.0382715	2.06769	up	ESCCAL-348	lincRNA:chr1:222457402-222620252 reverse strand	hs|1q42.11	chr1:222587441-222587382	DUSP10 (-671896), HHIPL2 (+134032)
A_19_P00316812	0.0495145	2.05833	down	ESCCAL-349	lincRNA:chr5:27476174-27485293 reverse strand	hs|5p14.1	chr5:27485092-27485033	CDH9 (-446374)
A_19_P00317776	0.049108	2.05722	down	ESCCAL-350	lincRNA:chr8:49330508-49333120 reverse strand	hs|8q11.21	chr8:49330988-49330929	EFCAB1 (+316911), UBE2V2 (+409964)
A_19_P00813475	0.0369332	2.05685	up	ESCCAL-351	lincRNA:chr2:123722255-124760730 reverse strand	hs|2q14.3	chr2:124520419-124520360	CNTNAP5 (-262474)
A_19_P00801508	0.0488944	2.05249	down	ESCCAL-352	lincRNA:chr4:129332975-129481400 forward strand	hs|4q28.2	chr4:129439880-129439939	PHF17 (-290869), PGRMC2 (-229926)
A_19_P00322024	0.0142753	2.0361	down	ESCCAL-353	lincRNA:chr5:1173272-1178707 reverse strand	hs|5p15.33	chr5:1175322-1175263	SLC12A7 (-63121), SLC6A19 (-26417)
A_19_P00326725	0.0331935	2.03201	down	ESCCAL-354	lincRNA:chr14:71971647-71983097 forward strand	hs|14q24.2	chr14:71974498-71974557	SIPA1L1 (-21501), PCNX (+600406)
A_19_P00321638	0.0158178	2.03128	down	ESCCAL-355	lincRNA:chr18:40154819-40223087 forward strand	hs|18q12.3	chr18:40222927-40222986	RIT2 (+472700), PIK3C3 (+687758)
A_19_P00329574	0.00418154	2.03107	down	ESCCAL-356	lincRNA:chr5:1544500-1567142 reverse strand	hs|5p15.33	chr5:1545355-1545296	LPCAT1 (-21250), MRPL36 (+254630)
A_19_P00320274	0.0451151	2.02996	down	XLOC_008863	BROAD lincRNAs version v2 (http://www.broadinstitute.org/genome_bio/human_lincrnas/)	hs|10q22.3	chr10:80703690-80703631	ZMIZ1 (-125131), RPS24 (+910143)
A_19_P00800681	0.041491	2.02914	down	XLOC_011183	BROAD lincRNAs version v2 (http://www.broadinstitute.org/genome_bio/human_lincrnas/)	hs|15q12	chr15:25279378-25279437	SNURF (+79338), UBE3A (+404767)
A_19_P00801521	0.00809292	2.02672	down	ESCCAL-357	lincRNA:chr6:86381806-86396056 reverse strand	hs|6q14.3	chr6:86383063-86383004	SYNCRIP (-29991)
A_19_P00806947	0.0391125	2.02428	up	ESCCAL-358	lincRNA:chrX:45897556-45923781 reverse strand	hs|Xp11.3	chrX:45918122-45918063	CXorf36 (-857947), ZNF673 (-388531)
A_19_P00320322	0.015036	2.02423	down	ESCCAL-359	lincRNA:chr17:62761217-62762236 reverse strand	hs|17q24.2	chr17:62761374-62761315	SMURF2 (-102959), LOC146880 (+16277)
A_19_P00804978	0.000268392	2.02185	down	ESCCAL-360	lincRNA:chr16:17970874-17975999 reverse strand	hs|16p12.3	chr16:17975403-17975344	XYLT1 (-410636), AK310228 (+459250)
A_19_P00329660	0.0233706	2.01643	down	ESCCAL-361	lincRNA:chr11:27223249-27240249 reverse strand	hs|11p14.1	chr11:27232552-27232493	BBOX1 (+170014), LGR4 (+261811)
A_19_P00808589	0.000151482	2.01257	down	ESCCAL-362	lincRNA:chr6:44057124-44057461 reverse strand	hs|6p21.1	chr6:44057362-44057303	MRPL14 (+37858), VEGFA (+319387)
A_19_P00808197	0.0295863	2.01144	down	ESCCAL-363	lincRNA:chr15:25561832-25577032 forward strand	hs|15q12	chr15:25568843-25568902	UBE3A (+115302), SNURF (+368803)
A_19_P00326362	0.0213701	2.01023	down	ESCCAL-364	lincRNA:chr8:142273943-142310368 forward strand	hs|8q24.3	chr8:142308675-142308734	SLC45A4 (-70032), GPR20 (+68660)
A_19_P00801783	0.0340128	2.00717	down	ESCCAL-365	lincRNA:chr12:89931569-89946444 forward strand	hs|12q21.33	chr12:89944347-89944406	GALNT4 (-25794), ATP2B1 (+105467)
A_19_P00810995	0.0017587	2.00701	up	ESCCAL-366	lincRNA:chr2:111960680-111962218 reverse strand	hs|2q13	chr2:111960740-111960681	BCL2L11 (+82220), ANAPC1 (+681030)
A_19_P00801444	0.0303604	2.00537	down	ESCCAL-367	lincRNA:chr6:11118364-11146189 reverse strand	hs|6p24.2	chr6:11130964-11130905	ERVFRD-1 (-18864), NEDD9 (+101980)

## Sheet: DE-mRNA
ProbeName	p value	FC	Regulation	Normal tissue	ESCC	GeneSymbol	Description	Chromosome.End.Index_Avadis_	Chromosome.Number_Avadis_	Chromosome.Start.Index_Avadis_	Chromosome.Strand_Avadis_	ControlType	Cytoband	EntrezGeneID	GenbankAccession	GeneName	GenomicCoordinates	Go	RefSeqAccession	UniGeneID
A_33_P3525263	0.0017299	25.6007	down	11.9526	7.27451	A2ML1	Homo sapiens alpha-2-macroglobulin-like 1 (A2ML1), mRNA [NM_144670]	9027120	chr12	9027061	+	FALSE	hs|12p13.31	144568	NM_144670	alpha-2-macroglobulin-like 1	chr12:9027061-9027120	GO:0004867|GO:0010466|GO:0005576|GO:0030414|GO:0005615|GO:0052548	NM_144670	Hs.620532
A_33_P3268487	0.00148899	3.2664	down	10.2125	8.50484	ABAT	Homo sapiens 4-aminobutyrate aminotransferase (ABAT), nuclear gene encoding mitochondrial protein, transcript variant 2, mRNA [NM_000663]	8878317	chr16	8878258	+	FALSE	hs|16p13.2	18	NM_000663	4-aminobutyrate aminotransferase	chr16:8878258-8878317	GO:0005515|GO:0003867|GO:0045471|GO:0007268|GO:0048148|GO:0045776|GO:0007269|GO:0042803|GO:0005739|GO:0032145|GO:0032144|GO:0005759|GO:0010039|GO:0009450|GO:0007610|GO:0007626|GO:0019717|GO:0001666|GO:0042493|GO:0047298|GO:0030170|GO:0007620|GO:0042135|GO:0016740|GO:0035094	NM_000663	Hs.336768
A_23_P78018	0.00159425	2.10757	down	10.7136	9.63802	ABCA5	Homo sapiens ATP-binding cassette, sub-family A (ABC1), member 5 (ABCA5), transcript variant 1, mRNA [NM_018672]	67243589	chr17	67243530	-	FALSE	hs|17q24.3	23461	NM_018672	ATP-binding cassette, sub-family A (ABC1), member 5	chr17:67243589-67243530	GO:0033344|GO:0005794|GO:0010745|GO:0005770|GO:0043691|GO:0005765|GO:0005524|GO:0005764|GO:0000139|GO:0000166|GO:0016020|GO:0034375|GO:0031902|GO:0006810|GO:0016021|GO:0016887	NM_018672	Hs.421474
A_23_P250294	0.00126319	2.4229	down	11.7652	10.4884	ABHD5	Homo sapiens abhydrolase domain containing 5 (ABHD5), mRNA [NM_016006]	43760090	chr3	43760031	+	FALSE	hs|3p21.33	51099	NM_016006	abhydrolase domain containing 5	chr3:43760031-43760090	GO:0005811|GO:0006629|GO:0042171|GO:0004806|GO:0010898|GO:0008654|GO:0003841|GO:0030154|GO:0005829|GO:0005737|GO:0010891|GO:0006631|GO:0019433|GO:0006654|GO:0016740|GO:0051006|GO:0008415	NM_016006	Hs.19385
A_33_P3219601	0.00235596	2.47921	up	7.47205	8.78193	ABL2	Homo sapiens v-abl Abelson murine leukemia viral oncogene homolog 2 (ABL2), transcript variant b, mRNA [NM_007314]	179076912	chr1	179076853	-	FALSE	hs|1q25.2	27	NM_007314	v-abl Abelson murine leukemia viral oncogene homolog 2	chr1:179076912-179076853	GO:0005515|GO:0051353|GO:0030145|GO:0000287|GO:0071300|GO:0018108|GO:0005524|GO:0005829|GO:0007165|GO:0005737|GO:0004672|GO:0000166|GO:0007411|GO:0010976|GO:0006468|GO:0004713|GO:0005856|GO:0007155|GO:0004715|GO:0006464	NM_007314	Hs.159472
A_33_P3388646	0.00150872	2.99444	down	8.71801	7.13573	ABLIM1	Homo sapiens actin binding LIM protein 1 (ABLIM1), transcript variant 3, mRNA [NM_001003408]	116194270	chr10	116194211	-	FALSE	hs|10q25.3	3983	NM_001003408	actin binding LIM protein 1	chr10:116194270-116194211	GO:0005515|GO:0005737|GO:0007411|GO:0045944|GO:0007010|GO:0009887|GO:0008270|GO:0003779|GO:0015629|GO:0007601|GO:0046872	NM_001003408	Hs.438236
A_24_P123408	0.000634	10.975	down	9.13872	5.68258	ABLIM3	Homo sapiens actin binding LIM protein family, member 3 (ABLIM3), mRNA [NM_014945]	148627383	chr5	148626089	+	FALSE	hs|5q32	22885	NM_014945	actin binding LIM protein family, member 3	chr5:148626089-148627383	GO:0005737|GO:0007411|GO:0045944|GO:0007010|GO:0008270|GO:0003779|GO:0046872	NM_014945	Hs.49688
A_23_P69339	0.000146	2.08107	down	12.7172	11.6599	ACAA1	Homo sapiens acetyl-CoA acyltransferase 1 (ACAA1), nuclear gene encoding mitochondrial protein, transcript variant 1, mRNA [NM_001607]	38164415	chr3	38164356	-	FALSE	hs|3p22.2	30	NM_001607	acetyl-CoA acyltransferase 1	chr3:38164415-38164356	GO:0005515|GO:0005782|GO:0006631|GO:0033540|GO:0006091|GO:0003988|GO:0044255|GO:0016740|GO:0043231|GO:0008415|GO:0005777	NM_001607	Hs.643487
A_23_P96761	0.00165142	2.10448	down	11.0584	9.98491	ACADM	Homo sapiens acyl-CoA dehydrogenase, C-4 to C-12 straight chain (ACADM), nuclear gene encoding mitochondrial protein, transcript variant 1, mRNA [NM_000016]	76228420	chr1	76227040	+	FALSE	hs|1p31.1	34	NM_000016	acyl-CoA dehydrogenase, C-4 to C-12 straight chain	chr1:76227040-76228420	GO:0006635|GO:0050660|GO:0019254|GO:0033539|GO:0042802|GO:0005739|GO:0005759|GO:0045329|GO:0051793|GO:0003995|GO:0051791|GO:0070991|GO:0044255|GO:0055114	NM_000016	Hs.445040
A_23_P307310	0.00165989	2.62429	up	7.82958	9.2215	ACAN	Homo sapiens aggrecan (ACAN), transcript variant 2, mRNA [NM_013227]	89417830	chr15	89417771	+	FALSE	hs|15q26.1	176	NM_013227	aggrecan	chr15:89417771-89417830	GO:0031012|GO:0005515|GO:0001501|GO:0005540|GO:0006508|GO:0005578|GO:0005529|GO:0005576|GO:0007155|GO:0005201	NM_013227	Hs.2159
A_23_P417415	0.00945543	2.31504	down	11.3335	10.1225	ACOT11	Homo sapiens acyl-CoA thioesterase 11 (ACOT11), transcript variant 2, mRNA [NM_147161]	55075733	chr1	55075674	+	FALSE	hs|1p32.3	26027	NM_147161	acyl-CoA thioesterase 11	chr1:55075674-55075733	GO:0035556|GO:0009266|GO:0005622|GO:0004091|GO:0005737|GO:0016787|GO:0016291|GO:0009409|GO:0006631	NM_147161	Hs.729424
A_33_P3352544	0.0034002	3.40444	down	11.8204	10.053	ACOT8	Homo sapiens acyl-CoA thioesterase 8 (ACOT8), mRNA [NM_005469]	44472981	chr20	44472922	-	FALSE	hs|20q13.12	10005	NM_005469	acyl-CoA thioesterase 8	chr20:44472981-44472922	GO:0004091|GO:0005515|GO:0006629|GO:0006637|GO:0005782|GO:0006699|GO:0016291|GO:0016289|GO:0005739|GO:0016787|GO:0044419|GO:0007031|GO:0003986|GO:0008206|GO:0033540|GO:0044255|GO:0033882|GO:0005777	NM_005469	Hs.444776
A_23_P316381	0.00906955	2.63579	down	10.3602	8.96198	ACOX3	Homo sapiens acyl-CoA oxidase 3, pristanoyl (ACOX3), transcript variant 1, mRNA [NM_003501]	8368669	chr4	8368610	-	FALSE	hs|4p16.1	8310	NM_003501	acyl-CoA oxidase 3, pristanoyl	chr4:8368669-8368610	GO:0005739|GO:0016402|GO:0005782|GO:0050660|GO:0006631|GO:0003997|GO:0008206|GO:0003995|GO:0033540|GO:0044255|GO:0005777	NM_003501	Hs.479122
A_24_P46130	0.000568	12.803	down	11.9248	8.2464	ACPP	Homo sapiens acid phosphatase, prostate (ACPP), transcript variant 1, mRNA [NM_001099]	132077402	chr3	132077343	+	FALSE	hs|3q22.1	55	NM_001099	acid phosphatase, prostate	chr3:132077343-132077402	GO:0016787|GO:0005886|GO:0003993|GO:0008253|GO:0005576|GO:0005765	NM_001099	Hs.433060
A_33_P3272402	0.000893	3.5834	down	10.4448	8.60344	ADAD2	Homo sapiens adenosine deaminase domain containing 2 (ADAD2), transcript variant 1, mRNA [NM_139174]	84230771	chr16	84230712	+	FALSE	hs|16q24.1	161931	NM_139174	adenosine deaminase domain containing 2	chr16:84230712-84230771	GO:0005622|GO:0003725|GO:0006396|GO:0004000	NM_139174	Hs.8977
A_33_P3310929	5.12e-05	6.26026	up	6.67385	9.32007	ADAM12	Homo sapiens ADAM metallopeptidase domain 12 (ADAM12), transcript variant 1, mRNA [NM_003474]	127703502	chr10	127703443	-	FALSE	hs|10q26.2	8038	NM_003474	ADAM metallopeptidase domain 12	chr10:127703502-127703443	GO:0005515|GO:0017124|GO:0005886|GO:0005576|GO:0007520|GO:0046872|GO:0007173|GO:0006508|GO:0008233|GO:0008270|GO:0016021|GO:0004222|GO:0007155|GO:0008237	NM_003474	Hs.594537
A_23_P44648	0.000169	4.62563	up	2.79539	5.00504	ADAMTS12	Homo sapiens ADAM metallopeptidase with thrombospondin type 1 motif, 12 (ADAMTS12), mRNA [NM_030955]	33534990	chr5	33527465	-	FALSE	hs|5p13.3	81792	NM_030955	ADAM metallopeptidase with thrombospondin type 1 motif, 12	chr5:33534990-33527465	GO:0006508|GO:0005578|GO:0008270|GO:0008233|GO:0005576|GO:0004222|GO:0046872	NM_030955	Hs.12680
A_24_P275073	0.000668	6.59365	up	7.97252	10.6936	ADAMTS14	Homo sapiens ADAM metallopeptidase with thrombospondin type 1 motif, 14 (ADAMTS14), transcript variant 1, mRNA [NM_139155]	72522191	chr10	72522132	+	FALSE	hs|10q22.1	140766	NM_139155	ADAM metallopeptidase with thrombospondin type 1 motif, 14	chr10:72522132-72522191	GO:0030199|GO:0030574|GO:0006508|GO:0005578|GO:0008270|GO:0008233|GO:0005576|GO:0004222|GO:0046872	NM_139155	Hs.352156
A_23_P213319	0.0017048	4.97337	up	3.81654	6.13077	ADAMTS6	Homo sapiens ADAM metallopeptidase with thrombospondin type 1 motif, 6 (ADAMTS6), mRNA [NM_197941]	64444890	chr5	64444831	-	FALSE	hs|5q12.3	11174	NM_197941	ADAM metallopeptidase with thrombospondin type 1 motif, 6	chr5:64444890-64444831	GO:0006508|GO:0005578|GO:0008270|GO:0008233|GO:0005576|GO:0004222|GO:0046872|GO:0008237	NM_197941	Hs.482291
A_33_P3380063	0.00660469	2.20665	down	9.31291	8.17105	ADAMTSL4	Homo sapiens ADAMTS-like 4 (ADAMTSL4), transcript variant 2, mRNA [NM_025008]	150531124	chr1	150531065	+	FALSE	hs|1q21.3	54507	NM_025008	ADAMTS-like 4	chr1:150531065-150531124	GO:0031012|GO:0005515|GO:0043065|GO:0030198|GO:0008233|GO:0005576|GO:0005575|GO:0005614|GO:0004222|GO:0002020	NM_025008	Hs.516243
A_24_P291658	0.00424316	6.86847	down	10.3617	7.5817	ADH1A	Homo sapiens alcohol dehydrogenase 1A (class I), alpha polypeptide (ADH1A), mRNA [NM_000667]	100200647	chr4	100200588	-	FALSE	hs|4q23	124	NM_000667	alcohol dehydrogenase 1A (class I), alpha polypeptide	chr4:100200647-100200588	GO:0005515|GO:0005737|GO:0006805|GO:0006066|GO:0006069|GO:0004024|GO:0016491|GO:0008270|GO:0046872|GO:0006351|GO:0005829	NM_000667	Hs.654433
A_33_P3353737	0.00218843	12.096	down	7.77764	4.18118	ADH1B	Homo sapiens alcohol dehydrogenase 1B (class I), beta polypeptide (ADH1B), mRNA [NM_000668]	100227587	chr4	100227528	-	FALSE	hs|4q23	125	NM_000668	alcohol dehydrogenase 1B (class I), beta polypeptide	chr4:100227587-100227528	GO:0005737|GO:0006805|GO:0005488|GO:0006069|GO:0004024|GO:0016491|GO:0008270|GO:0046872|GO:0005829	NM_000668	Hs.4
A_23_P81158	0.00876319	4.32684	down	11.5266	9.41333	ADH1C	Homo sapiens alcohol dehydrogenase 1C (class I), gamma polypeptide (ADH1C), mRNA [NM_000669]	100260740	chr4	100257881	-	FALSE	hs|4q23	126	NM_000669	alcohol dehydrogenase 1C (class I), gamma polypeptide	chr4:100260740-100257881	GO:0004022|GO:0005737|GO:0006805|GO:0005488|GO:0006069|GO:0016491|GO:0008270|GO:0046872|GO:0005829	NM_000669	Hs.654537
A_23_P157299	0.00179336	2.05176	up	11.8288	12.8657	AEBP1	Homo sapiens AE binding protein 1 (AEBP1), mRNA [NM_001129]	44153881	chr7	44153822	+	FALSE	hs|7p13	165	NM_001129	AE binding protein 1	chr7:44153822-44153881	GO:0006355|GO:0003700|GO:0003714|GO:0005576|GO:0005634|GO:0003677|GO:0005615|GO:0006351|GO:0031012|GO:0001501|GO:0005737|GO:0007517|GO:0004180|GO:0006508|GO:0008270|GO:0007155|GO:0004181	NM_001129	Hs.439463
A_23_P311640	0.000929	2.50222	down	9.72009	8.39688	AGFG2	Homo sapiens ArfGAP with FG repeats 2 (AGFG2), mRNA [NM_006076]	100163264	chr7	100163205	+	FALSE	hs|7q22.1	3268	NM_006076	ArfGAP with FG repeats 2	chr7:100163205-100163264	GO:0008150|GO:0008060|GO:0003674|GO:0032312|GO:0008270|GO:0005575|GO:0046872	NM_006076	Hs.521083
A_23_P69810	0.00122114	2.93563	down	10.6822	9.12849	AGPAT9	Homo sapiens 1-acylglycerol-3-phosphate O-acyltransferase 9 (AGPAT9), mRNA [NM_032717]	84526643	chr4	84526584	+	FALSE	hs|4q21.23	84803	NM_032717	1-acylglycerol-3-phosphate O-acyltransferase 9	chr4:84526584-84526643	GO:0032006|GO:0016020|GO:0005783|GO:0008152|GO:0019432|GO:0005789|GO:0004366|GO:0016021|GO:0008654|GO:0016740|GO:0008415	NM_032717	Hs.99196
A_23_P343411	0.000501	2.50774	up	9.76934	11.0957	AGRN	Homo sapiens agrin (AGRN), mRNA [NM_198576]	991245	chr1	991186	+	FALSE	hs|1p36.33	375790	NM_198576	agrin	chr1:991186-991245	GO:0005515|GO:0007009|GO:0009986|GO:0005605|GO:0045202|GO:0005576|GO:0045213|GO:0007213|GO:0007416|GO:0031012|GO:0007165|GO:0043525|GO:0050808|GO:0045162|GO:0007411|GO:0030548|GO:0045944|GO:0043236|GO:0005200|GO:0043113|GO:0008582	NM_198576	Hs.273330
A_33_P3250278	0.00254228	3.27084	down	8.22201	6.51235	AGXT	Homo sapiens alanine-glyoxylate aminotransferase (AGXT), mRNA [NM_000030]	241818522	chr2	241818463	+	FALSE	hs|2q37.3	189	NM_000030	alanine-glyoxylate aminotransferase	chr2:241818463-241818522	GO:0005515|GO:0046724|GO:0005782|GO:0006625|GO:0051384|GO:0051591|GO:0042803|GO:0008453|GO:0019265|GO:0005739|GO:0034641|GO:0005759|GO:0030170|GO:0046487|GO:0042866|GO:0004760|GO:0016597|GO:0016740|GO:0005777	NM_000030	Hs.144567
A_23_P41888	0.000773	2.68697	down	10.8445	9.41855	AGXT2L2	Homo sapiens alanine-glyoxylate aminotransferase 2-like 2 (AGXT2L2), mRNA [NM_153373]	177638915	chr5	177635882	-	FALSE	hs|5q35.3	85007	NM_153373	alanine-glyoxylate aminotransferase 2-like 2	chr5:177638915-177635882	GO:0005739|GO:0030170|GO:0008483|GO:0016740	NM_153373	Hs.248746
A_24_P943393	0.00760592	2.02578	down	16.052	15.0336	AHNAK	Homo sapiens AHNAK nucleoprotein (AHNAK), transcript variant 1, mRNA [NM_001620]	62283459	chr11	62283400	-	FALSE	hs|11q12.3	79026	NM_001620	AHNAK nucleoprotein	chr11:62283459-62283400	GO:0005515|GO:0005634|GO:0007399	NM_001620	Hs.502756
A_23_P21363	0.00761781	3.24353	down	12.3183	10.6207	AHNAK	Homo sapiens AHNAK nucleoprotein (AHNAK), transcript variant 2, mRNA [NM_024060]	62201142	chr11	62201083	-	FALSE	hs|11q12.3	79026	NM_024060	AHNAK nucleoprotein	chr11:62201142-62201083	GO:0005515|GO:0005634|GO:0007399	NM_024060	Hs.502756
A_23_P392384	0.00243398	7.25083	down	11.8957	9.03758	AIF1L	Homo sapiens allograft inflammatory factor 1-like (AIF1L), transcript variant 3, mRNA [NM_001185095]	133998392	chr9	133998333	+	FALSE	hs|9q34.12	83543	NM_001185095	allograft inflammatory factor 1-like	chr9:133998333-133998392	GO:0005737|GO:0051015|GO:0005886|GO:0005884|GO:0005509|GO:0032587|GO:0042995|GO:0015629|GO:0005925	NM_001185095	Hs.4944
A_33_P3260026	0.000492	6.21508	down	9.79309	7.15732	AIF1L	Homo sapiens allograft inflammatory factor 1-like (AIF1L), transcript variant 4, mRNA [NM_001185096]	133993221	chr9	133993162	+	FALSE	hs|9q34.12	83543	NM_001185096	allograft inflammatory factor 1-like	chr9:133993162-133993221	GO:0005737|GO:0051015|GO:0005886|GO:0005884|GO:0005509|GO:0032587|GO:0042995|GO:0015629|GO:0005925	NM_001185096	Hs.4944
A_23_P70785	0.000559	4.44958	down	11.8776	9.72389	AIM1	Homo sapiens absent in melanoma 1 (AIM1), mRNA [NM_001624]	107017822	chr6	107017763	+	FALSE	hs|6q21	202	NM_001624	absent in melanoma 1	chr6:107017763-107017822	GO:0008150|GO:0003674|GO:0005529|GO:0005575	NM_001624	Hs.728842
A_24_P308229	0.00327516	4.6652	down	9.45843	7.23649	AIM1L	Homo sapiens absent in melanoma 1-like (AIM1L), mRNA [NM_001039775]	26658099	chr1	26658040	-	FALSE	hs|1p36.11	55057	NM_001039775	absent in melanoma 1-like	chr1:26658099-26658040	GO:0005529	NM_001039775	Hs.128738
A_33_P3394380	0.00941557	2.36179	up	4.66461	5.9045	AKAP5	Homo sapiens A kinase (PRKA) anchor protein 5 (AKAP5), mRNA [NM_004857]	64935981	chr14	64935925	+	FALSE	hs|14q23.3	9495	NM_004857	A kinase (PRKA) anchor protein 5	chr14:64935925-64935981	GO:0005515|GO:0034237|GO:0005516|GO:0030346|GO:0048471|GO:0005886|GO:0021510|GO:0010524|GO:0030819|GO:0043267|GO:0031527|GO:0007268|GO:0050811|GO:0006605|GO:0032403|GO:0010739|GO:0043624|GO:0032279|GO:0005829|GO:0016323|GO:0005737|GO:0043198|GO:0051602|GO:0043025|GO:0051018|GO:0045296|GO:0001664|GO:0019901|GO:0008179|GO:0014850|GO:0060135|GO:0019904|GO:0051533|GO:0014069|GO:0003779|GO:0070887|GO:…	NM_004857	Hs.656683
A_23_P217114	0.00546218	2.01577	down	10.0319	9.02053	ALAD	Homo sapiens aminolevulinate dehydratase (ALAD), mRNA [NM_000031]	116149233	chr9	116149174	-	FALSE	hs|9q32	210	NM_000031	aminolevulinate dehydratase	chr9:116149233-116149174	GO:0006778|GO:0032791|GO:0051260|GO:0008270|GO:0004655|GO:0003824|GO:0016829|GO:0042802|GO:0006783|GO:0005829	NM_000031	Hs.1227
A_33_P3713357	0.00797751	3.40976	up	8.90038	10.6701	ALCAM	Homo sapiens activated leukocyte cell adhesion molecule (ALCAM), mRNA [NM_001627]	105294672	chr3	105294613	+	FALSE	hs|3q13.11	214	NM_001627	activated leukocyte cell adhesion molecule	chr3:105294613-105294672	GO:0030424|GO:0007165|GO:0008045|GO:0016020|GO:0007411|GO:0043025|GO:0005102|GO:0016021|GO:0007155|GO:0009897	NM_001627	Hs.591293
A_23_P170337	0.00440723	2.4114	down	12.1039	10.834	ALDH4A1	Homo sapiens aldehyde dehydrogenase 4 family, member A1 (ALDH4A1), nuclear gene encoding mitochondrial protein, transcript variant P5CDhL, mRNA [NM_003748]	19198108	chr1	19198049	-	FALSE	hs|1p36.13	8659	NM_003748	aldehyde dehydrogenase 4 family, member A1	chr1:19198108-19198049	GO:0005739|GO:0034641|GO:0006560|GO:0005759|GO:0016491|GO:0006562|GO:0004029|GO:0009055|GO:0006561|GO:0003842	NM_003748	Hs.77448
A_24_P385280	0.00140249	3.1193	down	12.4906	10.8494	ALDH9A1	Homo sapiens aldehyde dehydrogenase 9 family, member A1 (ALDH9A1), mRNA [NM_000696]	165632035	chr1	165631976	-	FALSE	hs|1q24.1	223	NM_000696	aldehyde dehydrogenase 9 family, member A1	chr1:165632035-165631976	GO:0005886|GO:0001822|GO:0004029|GO:0006081|GO:0004028|GO:0042803|GO:0005829|GO:0001889|GO:0034641|GO:0005737|GO:0051287|GO:0047105|GO:0045329|GO:0043176|GO:0016491|GO:0019145|GO:0042445|GO:0042136|GO:0055114	NM_000696	Hs.2533
A_32_P158355	0.00384865	2.48448	up	8.76973	10.0827	ALG1L	Homo sapiens asparagine-linked glycosylation 1-like (ALG1L), transcript variant 2, mRNA [NM_001015050]	125650482	chr3	125649415	-	FALSE	hs|3q21.2	200810	NM_001015050	asparagine-linked glycosylation 1-like	chr3:125650482-125649415	GO:0016757	NM_001015050	Hs.591299
A_23_P152906	0.00775459	11.9361	down	11.914	8.3367	ALOX12	Homo sapiens arachidonate 12-lipoxygenase (ALOX12), mRNA [NM_000697]	6913969	chr17	6913910	+	FALSE	hs|17p13.1	239	NM_000697	arachidonate 12-lipoxygenase	chr17:6913910-6913969	GO:0005515|GO:0008284|GO:0030307|GO:0006928|GO:0046872|GO:0005829|GO:0051789|GO:0005737|GO:0051901|GO:0042554|GO:0019370|GO:0019395|GO:0043065|GO:0005506|GO:0072593|GO:0006916|GO:0045785|GO:0010628|GO:0010595|GO:0031342|GO:0042383|GO:0043280|GO:0004052|GO:0031343|GO:0016165|GO:0016491|GO:0047977|GO:0045603	NM_000697	Hs.654431
A_23_P60627	0.00451863	5.44068	down	11.2788	8.83502	ALOX15B	Homo sapiens arachidonate 15-lipoxygenase, type B (ALOX15B), transcript variant d, mRNA [NM_001141]	7952241	chr17	7952182	+	FALSE	hs|17p13.1	247	NM_001141	arachidonate 15-lipoxygenase, type B	chr17:7952182-7952241	GO:0006629|GO:0019370|GO:0030336|GO:0008285|GO:0005506|GO:0006917|GO:0045786|GO:0046872|GO:0005622|GO:0005737|GO:0030856|GO:0016165|GO:0006631|GO:0016491|GO:0030850|GO:0045926|GO:0050473	NM_001141	Hs.111256
A_33_P3356007	0.00128049	2.07156	down	3.68207	2.63136	ALOX5	arachidonate 5-lipoxygenase [Source:HGNC Symbol;Acc:435] [ENST00000475300]	45937001	chr10	45936942	+	FALSE	hs|10q11.21	240	AB208946	arachidonate 5-lipoxygenase	chr10:45936942-45937001	GO:0005515|GO:0019369|GO:0005634|GO:0005635|GO:0006692|GO:0006691|GO:0046872|GO:0016363|GO:0030425|GO:0005829|GO:0005737|GO:0045907|GO:0002540|GO:0005641|GO:0019370|GO:0002526|GO:0031965|GO:0005506|GO:0007584|GO:0019372|GO:0005625|GO:0019233|GO:0042383|GO:0004051|GO:0016020|GO:0016165|GO:0055093|GO:0016491|GO:0042446	NA	NA
A_33_P3313245	0.0031118	2.16971	down	9.05546	7.93795	AMACR	Homo sapiens alpha-methylacyl-CoA racemase (AMACR), nuclear gene encoding mitochondrial protein, transcript variant 3, mRNA [NM_001167595]	33998831	chr5	33998772	-	FALSE	hs|5p13.2	23600	NM_001167595	alpha-methylacyl-CoA racemase	chr5:33998831-33998772	GO:0005739|GO:0005782|GO:0006699|GO:0008206|GO:0033540|GO:0016853|GO:0008111|GO:0044255|GO:0005777	NM_001167595	Hs.508343
A_23_P60079	0.00385996	2.2385	up	8.2835	9.44603	ANGPT2	Homo sapiens angiopoietin 2 (ANGPT2), transcript variant 1, mRNA [NM_001147]	6360349	chr8	6360290	-	FALSE	hs|8p23.1	285	NM_001147	angiopoietin 2	chr8:6360349-6360290	GO:0005515|GO:0014070|GO:0005886|GO:0031100|GO:0010812|GO:0005634|GO:0042995|GO:0050928|GO:0050900|GO:0007281|GO:0005615|GO:0030154|GO:0046872|GO:0051789|GO:0009314|GO:0001666|GO:0014823|GO:0030971|GO:0048014|GO:0060135|GO:0005102|GO:0007275|GO:0005576|GO:0045766|GO:0009612|GO:0009749|GO:0007165|GO:0007596|GO:0016525|GO:0043537	NM_001147	Hs.583870
A_33_P3218787	0.00260965	2.10145	down	5.02499	3.9536	ANK3	ankyrin 3, node of Ranvier (ankyrin G) [Source:HGNC Symbol;Acc:494] [ENST00000373815]	61899157	chr10	61899098	-	FALSE	hs|10q21.2	288	NA	ankyrin 3, node of Ranvier (ankyrin G)	chr10:61899157-61899098	GO:0005515|GO:0016323|GO:0007165|GO:0005737|GO:0005856|GO:0045184	NA	NA
A_33_P3236698	0.00724014	6.74993	up	4.30447	7.05935	ANKRD19P	Homo sapiens cDNA FLJ77364 complete cds, highly similar to Homo sapiens ankyrin repeat domain 19 (ANKRD19), mRNA. [AK292218]	95596334	chr9	95596275	+	FALSE	hs|9q22.31	138649	AK292218	ankyrin repeat domain 19, pseudogene	chr9:95596275-95596334	NA	NA	Hs.643597
A_33_P3313532	0.00785314	7.18612	down	10.4025	7.55733	ANKRD20A1	Homo sapiens ankyrin repeat domain 20 family, member A1 (ANKRD20A1), mRNA [NM_032250]	67927074	chr9	67927016	+	FALSE	hs|9q13	84210	NM_032250	ankyrin repeat domain 20 family, member A1	chr9:67927016-67927074	GO:0005886	NM_032250	Hs.632671
A_32_P66222	0.00402261	5.6778	down	8.41791	5.91258	ANKRD20A2	Homo sapiens ankyrin repeat domain 20 family, member A2 (ANKRD20A2), mRNA [NM_001012421]	42372227	chr9	42372006	+	FALSE	hs|9p12	441430	NM_001012421	ankyrin repeat domain 20 family, member A2	chr9:42372006-42372227	NA	NM_001012421	Hs.632663
A_33_P3407880	0.00159553	3.178	down	9.36594	7.69782	ANKRD22	Homo sapiens ankyrin repeat domain 22 (ANKRD22), mRNA [NM_144590]	90579787	chr10	90579728	-	FALSE	hs|10q23.31	118932	NM_144590	ankyrin repeat domain 22	chr10:90579787-90579728	NA	NM_144590	Hs.217484
A_32_P191786	0.00566406	2.98129	down	7.94635	6.37041	ANKRD24	Homo sapiens ankyrin repeat domain 24 (ANKRD24), mRNA [NM_133475]	4224453	chr19	4224159	+	FALSE	hs|19p13.3	170961	NM_133475	ankyrin repeat domain 24	chr19:4224159-4224453	NA	NM_133475	Hs.197872
A_33_P3362826	0.00119771	9.66281	down	7.38886	4.11641	ANKRD31	Homo sapiens ankyrin repeat domain 31 (ANKRD31), mRNA [NM_001164443]	74364266	chr5	74364207	-	FALSE	hs|5q13.3	256006	NM_001164443	ankyrin repeat domain 31	chr5:74364266-74364207	NA	NM_001164443	Hs.482533
A_23_P325690	0.000439	4.73371	down	13.1701	10.9271	ANKRD35	Homo sapiens ankyrin repeat domain 35 (ANKRD35), mRNA [NM_144698]	145568488	chr1	145568429	+	FALSE	hs|1q21.1	148741	NM_144698	ankyrin repeat domain 35	chr1:145568429-145568488	NA	NM_144698	Hs.710624
A_23_P356684	0.00752049	2.352	up	8.09659	9.33048	ANLN	Homo sapiens anillin, actin binding protein (ANLN), mRNA [NM_018685]	36492646	chr7	36492587	+	FALSE	hs|7p14.2	54443	NM_018685	anillin, actin binding protein	chr7:36492587-36492646	GO:0005515|GO:0000910|GO:0007067|GO:0007049|GO:0005826|GO:0005737|GO:0000921|GO:0007096|GO:0005634|GO:0003779|GO:0015629|GO:0005938	NM_018685	Hs.62180
A_33_P3371224	0.00178096	2.49127	down	10.5822	9.26536	ANO10	Homo sapiens anoctamin 10 (ANO10), transcript variant 2, mRNA [NM_001204831]	43407878	chr3	43407819	-	FALSE	hs|3p22.1	55129	NM_001204831	anoctamin 10	chr3:43407878-43407819	GO:0008219|GO:0016020|GO:0034707|GO:0016021|GO:0005254|GO:0005216|GO:0006811	NM_001204831	Hs.656657
A_24_P131522	0.000119	2.15311	up	10.8313	11.9377	ANTXR1	Homo sapiens anthrax toxin receptor 1 (ANTXR1), transcript variant 1, mRNA [NM_032208]	69476184	chr2	69476125	+	FALSE	hs|2p13.3	84168	NM_032208	anthrax toxin receptor 1	chr2:69476125-69476184	GO:0005515|GO:0051015|GO:0031532|GO:0031258|GO:0005886|GO:0005518|GO:0031527|GO:0034446|GO:0042995|GO:0016021|GO:0046872|GO:0004888	NM_032208	Hs.165859
A_23_P84576	0.00304788	2.24304	up	6.77246	7.93791	ANTXR1	Homo sapiens anthrax toxin receptor 1 (ANTXR1), transcript variant 2, mRNA [NM_053034]	69302783	chr2	69302724	+	FALSE	hs|2p13.3	84168	NM_053034	anthrax toxin receptor 1	chr2:69302724-69302783	GO:0005515|GO:0051015|GO:0031532|GO:0031258|GO:0005886|GO:0005518|GO:0031527|GO:0034446|GO:0042995|GO:0016021|GO:0046872|GO:0004888	NM_053034	Hs.165859
A_23_P94501	0.00683899	4.12905	down	18.0782	16.0323	ANXA1	Homo sapiens annexin A1 (ANXA1), mRNA [NM_000700]	75785061	chr9	75785002	+	FALSE	hs|9q21.13	301	NM_000700	annexin A1	chr9:75785002-75785061	GO:0005515|GO:0014070|GO:0070301|GO:0046632|GO:0060206|GO:0005615|GO:0042803|GO:0003697|GO:0042127|GO:0030674|GO:0032355|GO:0031966|GO:0005509|GO:0031394|GO:0051384|GO:0002674|GO:0042063|GO:0005929|GO:0043234|GO:0007049|GO:0050709|GO:0030073|GO:0006629|GO:0003727|GO:0010165|GO:0006928|GO:0031340|GO:0043434|GO:0005634|GO:0001533|GO:0005544|GO:0016323|GO:0005737|GO:0006954|GO:0005543|GO:0070555|GO:…	NM_000700	Hs.494173
A_23_P121716	0.00271641	2.78706	down	11.663	10.1842	ANXA3	Homo sapiens annexin A3 (ANXA3), mRNA [NM_005139]	79531210	chr4	79525495	+	FALSE	hs|4q21.21	306	NM_005139	annexin A3	chr4:79525495-79531210	GO:0006909|GO:0030424|GO:0051054|GO:0005886|GO:0043312|GO:0005509|GO:0031100|GO:0042581|GO:0051384|GO:0019834|GO:0070848|GO:0045766|GO:0030425|GO:0005544|GO:0010595|GO:0021766|GO:0051091|GO:0005737|GO:0016020|GO:0043025|GO:0030670|GO:0042742	NM_005139	Hs.480042
A_23_P103617	0.00127033	18.7795	down	9.36781	5.13672	ANXA9	Homo sapiens annexin A9 (ANXA9), mRNA [NM_003568]	150968002	chr1	150967943	+	FALSE	hs|1q21.3	8416	NM_003568	annexin A9	chr1:150967943-150968002	GO:0005544|GO:0016337|GO:0005543|GO:0009986|GO:0015464|GO:0005509|GO:0001786|GO:0042803|GO:0005829	NM_003568	Hs.728894
A_23_P160729	0.0012525	2.04893	down	9.39175	8.35688	AP4B1	Homo sapiens adaptor-related protein complex 4, beta 1 subunit (AP4B1), mRNA [NM_006594]	114438026	chr1	114437967	-	FALSE	hs|1p13.2	10717	NM_006594	adaptor-related protein complex 4, beta 1 subunit	chr1:114438026-114437967	GO:0005802|GO:0005515|GO:0005215|GO:0030131|GO:0005794|GO:0008565|GO:0006810|GO:0005625|GO:0016192|GO:0006886|GO:0030117	NM_006594	Hs.515048
A_23_P113393	0.00073	3.04944	up	6.29191	7.90045	APLN	Homo sapiens apelin (APLN), mRNA [NM_017413]	128779470	chrX	128779411	-	FALSE	hs|Xq26.1	8862	NM_017413	apelin	chrX:128779470-128779411	GO:0048471|GO:0008284|GO:0005102|GO:0005576|GO:0045776|GO:0005615|GO:0007165|GO:0006955|GO:0043576|GO:0005179|GO:0007595|GO:0045906|GO:0002026|GO:0042756|GO:0045909|GO:0051461|GO:0031652|GO:0051466|GO:0050878|GO:0042327	NM_017413	Hs.303084
A_24_P109214	0.00115428	11.9706	up	8.50689	12.0883	APOC1	Homo sapiens apolipoprotein C-I (APOC1), mRNA [NM_001645]	45422495	chr19	45422436	+	FALSE	hs|19q13.32	341	NM_001645	apolipoprotein C-I	chr19:45422436-45422495	GO:0006629|GO:0032375|GO:0050995|GO:0005783|GO:0042627|GO:0010900|GO:0010873|GO:0034379|GO:0060228|GO:0034361|GO:0034364|GO:0034382|GO:0006810|GO:0055102|GO:0034447|GO:0008203|GO:0033344|GO:0005504|GO:0004859|GO:0032374|GO:0045717|GO:0031210|GO:0005576|GO:0034369|GO:0051005|GO:0010916|GO:0033700|GO:0048261|GO:0034375|GO:0042157|GO:0032368|GO:0006641|GO:0045833	NM_001645	Hs.110675
A_23_P208302	0.00988699	3.65049	up	4.8777	6.74579	APOC2	Homo sapiens apolipoprotein C-II (APOC2), mRNA [NM_000483]	45452699	chr19	45452640	+	FALSE	hs|19q13.32	344	NM_000483	apolipoprotein C-II	chr19:45452640-45452699	GO:0006629|GO:0032375|GO:0060697|GO:0042627|GO:0070328|GO:0010898|GO:0010902|GO:0005615|GO:0042803|GO:0008289|GO:0034361|GO:0042953|GO:0034384|GO:0043274|GO:0034382|GO:0034363|GO:0034362|GO:0006810|GO:0055102|GO:0042632|GO:0033344|GO:0045723|GO:0042493|GO:0043691|GO:0034366|GO:0010518|GO:0005576|GO:0060230|GO:0016042|GO:0010916|GO:0034370|GO:0033700|GO:0034372|GO:0016004|GO:0034371|GO:0048261|GO:…	NM_000483	Hs.75615
A_33_P3223592	0.00787797	3.04763	up	13.9548	15.5625	APOE	Homo sapiens apolipoprotein E (APOE), mRNA [NM_000041]	45412649	chr19	45412590	+	FALSE	hs|19q13.32	348	NM_000041	apolipoprotein E	chr19:45412590-45412649	GO:0005515|GO:0010468|GO:0008219|GO:0006707|GO:0046911|GO:0002021|GO:0005615|GO:0042803|GO:0042802|GO:0034361|GO:0034364|GO:0034363|GO:0034362|GO:0043025|GO:0034447|GO:0042632|GO:0033344|GO:0005794|GO:0016209|GO:0043691|GO:0007568|GO:0031232|GO:0006898|GO:0007271|GO:0034372|GO:0034374|GO:0007186|GO:0034375|GO:0042157|GO:0006641|GO:0000302|GO:0043537|GO:0042159|GO:0005319|GO:0042158|GO:0006629|GO:…	NM_000041	Hs.654439
A_33_P3232523	0.00324919	4.17704	down	9.39267	7.33019	APOL4	apolipoprotein L, 4 [Source:HGNC Symbol;Acc:14867] [ENST00000328429]	36593748	chr22	36593689	-	FALSE	hs|22q12.3	80832	BC006276	apolipoprotein L, 4	chr22:36593748-36593689	GO:0006629|GO:0003674|GO:0006869|GO:0042157|GO:0006810|GO:0005576|GO:0005575|GO:0008289	NA	Hs.726733
A_33_P3209591	0.0015792	8.57478	down	11.7904	8.69029	AQP3	Homo sapiens aquaporin 3 (Gill blood group) (AQP3), mRNA [NM_004925]	33442956	chr9	33442897	-	FALSE	hs|9p13.3	360	NM_004925	aquaporin 3 (Gill blood group)	chr9:33442956-33442897	GO:0005215|GO:0007588|GO:0005886|GO:0033280|GO:0002684|GO:0070295|GO:0055085|GO:0015840|GO:0051592|GO:0045616|GO:0016323|GO:0005737|GO:0005911|GO:0015250|GO:0015793|GO:0042476|GO:0006810|GO:0032526|GO:0006833|GO:0015254|GO:0016021	NM_004925	Hs.234642
A_23_P158041	0.00929175	3.70523	down	7.67222	5.78265	AQP7	Homo sapiens aquaporin 7 (AQP7), mRNA [NM_001170]	33395133	chr9	33387089	-	FALSE	hs|9p13.3	364	NM_001170	aquaporin 7	chr9:33395133-33387089	GO:0005215|GO:0007588|GO:0005886|GO:0042493|GO:0031526|GO:0006091|GO:0007283|GO:0070295|GO:0055085|GO:0015840|GO:0005737|GO:0016020|GO:0005887|GO:0005911|GO:0030529|GO:0015250|GO:0015793|GO:0015265|GO:0016021|GO:0006833|GO:0015254	NM_001170	Hs.455323
A_23_P113111	0.00295268	3.12063	down	8.83074	7.1889	AR	Homo sapiens androgen receptor (AR), transcript variant 1, mRNA [NM_000044]	66944092	chrX	66944033	+	FALSE	hs|Xq12	367	NM_000044	androgen receptor	chrX:66944033-66944092	GO:0005515|GO:0008219|GO:0010467|GO:0000790|GO:0004882|GO:0003700|GO:0008013|GO:0044212|GO:0050680|GO:0003706|GO:0060571|GO:0050681|GO:0048645|GO:0046983|GO:0006810|GO:0048808|GO:0007548|GO:0005497|GO:0005496|GO:0060685|GO:0032868|GO:0001701|GO:0048638|GO:0016049|GO:0008270|GO:0005654|GO:0033148|GO:0019899|GO:0045893|GO:0008134|GO:0030424|GO:0034339|GO:0008284|GO:0060736|GO:0046661|GO:0008283|GO:…	NM_000044	Hs.496240
A_24_P472455	0.000432	2.35698	down	10.7291	9.49214	ARF6	Homo sapiens ADP-ribosylation factor 6 (ARF6), mRNA [NM_001663]	50363230	chr14	50363171	+	FALSE	hs|14q21.3	382	NM_001663	ADP-ribosylation factor 6	chr14:50363171-50363230	GO:0005515|GO:0035020|GO:0005886|GO:0007264|GO:0031527|GO:0003924|GO:0006928|GO:0031996|GO:0015031|GO:0031529|GO:0030154|GO:0005622|GO:0051489|GO:0005737|GO:0000166|GO:0030838|GO:0060998|GO:0007155|GO:0016192|GO:0005938|GO:0005794|GO:0005624|GO:0006915|GO:0005525|GO:0001726|GO:0007399|GO:0001889|GO:0006184|GO:0030866|GO:0048261|GO:0034394|GO:0055037|GO:0005769|GO:0010008|GO:0090004|GO:0005768	NM_001663	Hs.525330
A_23_P21548	0.00191739	3.11522	down	10.3805	8.74116	ARHGAP10	Homo sapiens Rho GTPase activating protein 10 (ARHGAP10), mRNA [NM_024605]	148993487	chr4	148993428	+	FALSE	hs|4q31.23	79658	NM_024605	Rho GTPase activating protein 10	chr4:148993428-148993487	GO:0051056|GO:0048471|GO:0017124|GO:0005886|GO:0007264|GO:0006915|GO:0042981|GO:0005100|GO:0005829|GO:0043547|GO:0005622|GO:0007165|GO:0005737|GO:0007010|GO:0046847|GO:0008093|GO:0005096	NM_024605	Hs.368631
A_33_P3339375	0.00977825	2.09677	up	7.54961	8.61777	ARHGAP11B	Homo sapiens Rho GTPase activating protein 11B (ARHGAP11B), mRNA [NM_001039841]	30927820	chr15	30927761	+	FALSE	hs|15q13.2	89839	NM_001039841	Rho GTPase activating protein 11B	chr15:30927761-30927820	GO:0043547|GO:0005622|GO:0051056|GO:0007165|GO:0007264|GO:0005829|GO:0005096	NM_001039841	Hs.659621
A_33_P3228558	0.00212941	2.49378	down	14.3672	13.0488	ARHGAP27	Homo sapiens Rho GTPase activating protein 27 (ARHGAP27), transcript variant 1, mRNA [NM_199282]	43471360	chr17	43471301	-	FALSE	hs|17q21.31	201176	NM_199282	Rho GTPase activating protein 27	chr17:43471360-43471301	GO:0005622|GO:0007165|GO:0017124|GO:0005737|GO:0016020|GO:0043089|GO:0032855|GO:0030675|GO:0006898|GO:0005096	NM_199282	Hs.463165
A_23_P161686	0.00446409	2.55313	down	10.1554	8.80317	ARHGAP32	Homo sapiens Rho GTPase activating protein 32 (ARHGAP32), transcript variant 2, mRNA [NM_014715]	128838460	chr11	128838401	-	FALSE	hs|11q24.3	9743	NM_014715	Rho GTPase activating protein 32	chr11:128838460-128838401	GO:0030054|GO:0005886|GO:0005783|GO:0007264|GO:0045202|GO:0042995|GO:0015629|GO:0005829|GO:0005622|GO:0005737|GO:0007154|GO:0043197|GO:0045211|GO:0005938|GO:0051056|GO:0005794|GO:0014069|GO:0043547|GO:0007165|GO:0000139|GO:0005789|GO:0035091|GO:0010008|GO:0005768|GO:0005096	NM_014715	Hs.440379
A_33_P3254708	0.000637	3.94553	down	8.72085	6.74063	ARHGAP40	Homo sapiens Rho GTPase activating protein 40 (ARHGAP40), mRNA [NM_001164431]	37275768	chr20	37275709	+	FALSE	hs|20q11.23	343578	NM_001164431	Rho GTPase activating protein 40	chr20:37275709-37275768	GO:0043547|GO:0005622|GO:0051056|GO:0007165|GO:0007264|GO:0005829|GO:0005096	NM_001164431	Hs.451997
A_23_P217428	0.00775963	2.53547	down	7.3162	5.97394	ARHGAP6	Homo sapiens Rho GTPase activating protein 6 (ARHGAP6), transcript variant 1, mRNA [NM_013427]	11155690	chrX	11155663	-	FALSE	hs|Xp22.2	395	NM_013427	Rho GTPase activating protein 6	chrX:11155690-11155663	GO:0051056|GO:0017124|GO:0007264|GO:0005884|GO:0010518|GO:0007202|GO:0007266|GO:0015629|GO:0043087|GO:0005100|GO:0051895|GO:0005829|GO:0051497|GO:0043547|GO:0005622|GO:0007165|GO:0005737|GO:0016004|GO:0043274|GO:0032321|GO:0005070|GO:0030041|GO:0007015|GO:0005096	NM_013427	Hs.435291
A_33_P3799936	0.00951661	2.21879	down	13.6515	12.5018	ARHGEF10L	Homo sapiens Rho guanine nucleotide exchange factor (GEF) 10-like (ARHGEF10L), transcript variant 1, mRNA [NM_018125]	18024360	chr1	18024301	+	FALSE	hs|1p36.13	55160	NM_018125	Rho guanine nucleotide exchange factor (GEF) 10-like	chr1:18024301-18024360	GO:0005622|GO:0005085|GO:0005737|GO:0035023|GO:0032321|GO:0051496|GO:0035104|GO:0005089|GO:0005100|GO:0005829	NM_018125	Hs.443460
A_32_P222695	0.00441749	2.069	down	10.4239	9.375	ARHGEF37	Homo sapiens Rho guanine nucleotide exchange factor (GEF) 37 (ARHGEF37), mRNA [NM_001001669]	149014215	chr5	149014156	+	FALSE	hs|5q32	389337	NM_001001669	Rho guanine nucleotide exchange factor (GEF) 37	chr5:149014156-149014215	GO:0005622|GO:0005085|GO:0005737|GO:0035023|GO:0005089	NM_001001669	Hs.256206
A_33_P3221568	0.0078707	2.1106	down	11.5276	10.45	ARMC5	Homo sapiens armadillo repeat containing 5 (ARMC5), transcript variant 2, mRNA [NM_024742]	31476451	chr16	31476392	+	FALSE	hs|16p11.2	79798	NM_024742	armadillo repeat containing 5	chr16:31476392-31476451	GO:0005488	NM_024742	Hs.121915
A_23_P209731	0.000674	3.21698	up	8.41055	10.0963	ARMC9	Homo sapiens armadillo repeat containing 9 (ARMC9), mRNA [NM_025139]	232209867	chr2	232209808	+	FALSE	hs|2q37.1	80210	NM_025139	armadillo repeat containing 9	chr2:232209808-232209867	GO:0005488	NM_025139	Hs.471610
A_24_P274615	0.00221017	2.09462	down	10.8431	9.7764	ARRDC3	Homo sapiens arrestin domain containing 3 (ARRDC3), mRNA [NM_020801]	90664749	chr5	90664690	-	FALSE	hs|5q14.3	57561	NM_020801	arrestin domain containing 3	chr5:90664749-90664690	GO:0005515|GO:0007165|GO:0005737	NM_020801	Hs.24684
A_24_P205213	0.00616186	2.15517	up	5.27842	6.38622	ARSB	Homo sapiens arylsulfatase B (ARSB), transcript variant 2, mRNA [NM_198709]	78181467	chr5	78181408	-	FALSE	hs|5q14.1	411	NM_198709	arylsulfatase B	chr5:78181467-78181408	GO:0005791|GO:0043627|GO:0005794|GO:0007584|GO:0006914|GO:0008484|GO:0003824|GO:0007417|GO:0005764|GO:0046872|GO:0005739|GO:0003943|GO:0051597|GO:0016787|GO:0004065|GO:0007041|GO:0007040|GO:0009268	NM_198709	Hs.149103
A_23_P304304	0.00482265	3.94496	down	7.08722	5.10721	ARSF	Homo sapiens arylsulfatase F (ARSF), transcript variant 1, mRNA [NM_004042]	3030341	chrX	3030282	+	FALSE	hs|Xp22.33	416	NM_004042	arylsulfatase F	chrX:3030282-3030341	GO:0016787|GO:0005576|GO:0004065|GO:0046872	NM_004042	Hs.101674
A_23_P116902	0.00324329	53.895	down	11.8963	6.14417	ART4	Homo sapiens ADP-ribosyltransferase 4 (Dombrock blood group) (ART4), mRNA [NM_021071]	14982356	chr12	14982297	-	FALSE	hs|12p12.3	420	NM_021071	ADP-ribosyltransferase 4 (Dombrock blood group)	chr12:14982356-14982297	GO:0006471|GO:0016020|GO:0005886|GO:0016757|GO:0003956|GO:0006525|GO:0031225	NM_021071	Hs.655792
A_33_P3404525	0.0047568	2.47898	down	6.26362	4.95387	ASGR1	Homo sapiens cDNA, FLJ98718. [AK308677]	7080753	chr17	7080694	-	FALSE	hs|17p13.1	432	AK308677	asialoglycoprotein receptor 1	chr17:7080753-7080694	GO:0005515|GO:0016020|GO:0005887|GO:0005488|GO:0031668|GO:0005529|GO:0004873|GO:0004872|GO:0046872|GO:0042803|GO:0006898	NA	NA
A_23_P164436	0.00823658	3.60076	down	8.1055	6.25719	ASPA	Homo sapiens aspartoacylase (ASPA), transcript variant 1, mRNA [NM_000049]	3402515	chr17	3402456	+	FALSE	hs|17p13.2	443	NM_000049	aspartoacylase	chr17:3402456-3402515	GO:0005737|GO:0019807|GO:0022010|GO:0006533|GO:0048714|GO:0008152|GO:0016788|GO:0005634|GO:0004046|GO:0046872	NM_000049	Hs.171142
A_23_P76743	0.000945	13.3766	down	12.2413	8.49968	ASPG	Homo sapiens asparaginase homolog (S. cerevisiae) (ASPG), mRNA [NM_001080464]	104578924	chr14	104578865	+	FALSE	hs|14q32.33	374569	NM_001080464	asparaginase homolog (S. cerevisiae)	chr14:104578865-104578924	GO:0016042|GO:0006520|GO:0016787|GO:0004622|GO:0004067|GO:0006528|GO:0005625|GO:0003847|GO:0006644	NM_001080464	Hs.146239
A_33_P3314276	0.000231	7.34345	up	6.67391	9.55036	ASPHD1	Homo sapiens aspartate beta-hydroxylase domain containing 1 (ASPHD1), mRNA [NM_181718]	29917375	chr16	29917316	+	FALSE	hs|16p11.2	253982	NM_181718	aspartate beta-hydroxylase domain containing 1	chr16:29917316-29917375	GO:0016020|GO:0018193|GO:0016491|GO:0030176|GO:0016021|GO:0016702	NM_181718	Hs.655761
A_23_P142878	0.00352568	2.29177	down	6.63133	5.43487	ATOH8	Homo sapiens atonal homolog 8 (Drosophila) (ATOH8), mRNA [NM_032827]	86014927	chr2	86014868	+	FALSE	hs|2p11.2	84913	NM_032827	atonal homolog 8 (Drosophila)	chr2:86014868-86014927	GO:0006355|GO:0007275|GO:0005634|GO:0003677|GO:0030154|GO:0007399	NM_032827	Hs.135569
A_23_P29394	0.00526257	5.07392	down	7.07408	4.73098	ATP13A4	Homo sapiens ATPase type 13A4 (ATP13A4), mRNA [NM_032279]	193159347	chr3	193159288	-	FALSE	hs|3q29	84239	NM_032279	ATPase type 13A4	chr3:193159347-193159288	GO:0006754|GO:0016787|GO:0016020|GO:0000166|GO:0016820|GO:0016021|GO:0016887|GO:0005524|GO:0046872|GO:0006812|GO:0015662	NM_032279	Hs.674423
A_23_P68007	0.000843	2.03187	up	15.458	16.4808	ATP1B3	Homo sapiens ATPase, Na+/K+ transporting, beta 3 polypeptide (ATP1B3), mRNA [NM_001679]	141645001	chr3	141644942	+	FALSE	hs|3q23	483	NM_001679	ATPase, Na+/K+ transporting, beta 3 polypeptide	chr3:141644942-141645001	GO:0005515|GO:0042470|GO:0005886|GO:0050900|GO:0005890|GO:0055085|GO:0005737|GO:0006754|GO:0034220|GO:0007596|GO:0005901|GO:0006810|GO:0016021|GO:0006814|GO:0006813|GO:0005391	NM_001679	Hs.477789
A_23_P72462	0.00169482	2.23752	up	3.03769	4.19959	ATP2A1	Homo sapiens ATPase, Ca++ transporting, cardiac muscle, fast twitch 1 (ATP2A1), transcript variant b, mRNA [NM_173201]	28914748	chr16	28914689	+	FALSE	hs|16p11.2	487	NM_173201	ATPase, Ca++ transporting, cardiac muscle, fast twitch 1	chr16:28914689-28914748	GO:0005515|GO:0048471|GO:0034976|GO:0006200|GO:0006942|GO:0046872|GO:0042803|GO:0006754|GO:0034220|GO:0008637|GO:0000166|GO:0051561|GO:0045988|GO:0006816|GO:0016820|GO:0031095|GO:0006812|GO:0005792|GO:0005793|GO:0090076|GO:0005509|GO:0033017|GO:0030168|GO:0034704|GO:0055085|GO:0005524|GO:0005388|GO:0070509|GO:0016529|GO:0016020|GO:0016787|GO:0070059|GO:0007596|GO:0031448|GO:0005789|GO:0051659|GO:…	NM_173201	Hs.657344
A_23_P215111	0.00948921	5.83495	down	9.85306	7.30834	ATP6V0A4	Homo sapiens ATPase, H+ transporting, lysosomal V0 subunit a4 (ATP6V0A4), transcript variant 1, mRNA [NM_020632]	138391206	chr7	138391147	-	FALSE	hs|7q34	50617	NM_020632	ATPase, H+ transporting, lysosomal V0 subunit a4	chr7:138391206-138391147	GO:0005515|GO:0008286|GO:0007588|GO:0033177|GO:0005886|GO:0007605|GO:0015078|GO:0045177|GO:0031526|GO:0055085|GO:0006885|GO:0006879|GO:0033572|GO:0016324|GO:0001503|GO:0015991|GO:0051117|GO:0016021|GO:0016471|GO:0010008|GO:0015992|GO:0005768|GO:0006811	NM_020632	Hs.98967
A_33_P3387463	0.00266251	2.34023	down	12.0117	10.785	ATP6V1D	Homo sapiens ATPase, H+ transporting, lysosomal 34kDa, V1 subunit D (ATP6V1D), mRNA [NM_015994]	67804649	chr14	67804590	-	FALSE	hs|14q23.3	51382	NM_015994	ATPase, H+ transporting, lysosomal 34kDa, V1 subunit D	chr14:67804649-67804590	GO:0005515|GO:0008286|GO:0042626|GO:0055085|GO:0005829|GO:0006879|GO:0033572|GO:0016020|GO:0046961|GO:0015991|GO:0016471|GO:0006811|GO:0015992|GO:0033178	NM_015994	Hs.272630
A_23_P37441	0.0099988	2.14982	up	15.5948	16.699	B2M	Homo sapiens beta-2-microglobulin (B2M), mRNA [NM_004048]	45007832	chr15	45007773	+	FALSE	hs|15q21.1	567	NM_004048	beta-2-microglobulin	chr15:45007773-45007832	GO:0005515|GO:0002474|GO:0005886|GO:0042493|GO:0042612|GO:0019221|GO:0005576|GO:0005615|GO:0050690|GO:0000139|GO:0031901|GO:0050776|GO:0016032|GO:0046686|GO:0060333	NM_004048	Hs.534255
A_23_P101380	0.00744809	3.05518	down	11.9317	10.3204	B3GNT8	Homo sapiens UDP-GlcNAc:betaGal beta-1,3-N-acetylglucosaminyltransferase 8 (B3GNT8), mRNA [NM_198540]	41931342	chr19	41931283	-	FALSE	hs|19q13.2	374907	NM_198540	UDP-GlcNAc:betaGal beta-1,3-N-acetylglucosaminyltransferase 8	chr19:41931342-41931283	GO:0005794|GO:0016020|GO:0000139|GO:0030311|GO:0016757|GO:0016262|GO:0006486|GO:0016021|GO:0008378	NM_198540	Hs.441681
A_23_P13083	0.0025886	9.83825	down	8.70697	5.40857	BARX2	Homo sapiens BARX homeobox 2 (BARX2), mRNA [NM_003658]	129321496	chr11	129321437	+	FALSE	hs|11q24.3	8538	NM_003658	BARX homeobox 2	chr11:129321437-129321496	GO:0043565|GO:0005667|GO:0014902|GO:0003700|GO:0001502|GO:0045944|GO:0003682|GO:0005634|GO:0000122|GO:0003677|GO:0042637	NM_003658	Hs.591944
A_23_P370682	0.00254866	4.6542	up	7.3914	9.60994	BATF2	Homo sapiens basic leucine zipper transcription factor, ATF-like 2 (BATF2), mRNA [NM_138456]	64755631	chr11	64755572	-	FALSE	hs|11q13.1	116071	NM_138456	basic leucine zipper transcription factor, ATF-like 2	chr11:64755631-64755572	GO:0043565|GO:0005515|GO:0003700|GO:0046983|GO:0005634	NM_138456	Hs.124840
A_23_P160720	0.00630083	2.4519	up	8.22563	9.51953	BATF3	Homo sapiens basic leucine zipper transcription factor, ATF-like 3 (BATF3), mRNA [NM_018664]	212860087	chr1	212860028	-	FALSE	hs|1q32.3	55509	NM_018664	basic leucine zipper transcription factor, ATF-like 3	chr1:212860087-212860028	GO:0043565|GO:0006355|GO:0003700|GO:0006366|GO:0003714|GO:0046983|GO:0005634	NM_018664	Hs.62919
A_23_P382775	0.00145422	2.18688	up	9.45923	10.5881	BBC3	Homo sapiens BCL2 binding component 3 (BBC3), transcript variant 4, mRNA [NM_014417]	47724233	chr19	47724174	-	FALSE	hs|19q13.32	27113	NM_014417	BCL2 binding component 3	chr19:47724233-47724174	GO:0005515|GO:0032464|GO:0008633|GO:0051209|GO:0006919|GO:0070245|GO:0001844|GO:0071456|GO:0006915|GO:0001836|GO:0005741|GO:0006917|GO:0008340|GO:0005829|GO:0005739|GO:0042771|GO:0090200|GO:0032471|GO:0045926|GO:0008629	NM_014417	Hs.467020
A_23_P252642	0.00571079	3.30006	up	15.1744	16.8969	BBS5	Homo sapiens Bardet-Biedl syndrome 5 (BBS5), mRNA [NM_152384]	170362944	chr2	170362885	+	FALSE	hs|2q31.1	129880	NM_152384	Bardet-Biedl syndrome 5	chr2:170362885-170362944	GO:0005515|GO:0060170|GO:0034464|GO:0005886|GO:0032266|GO:0032402|GO:0001947|GO:0005622|GO:0042384|GO:0005929|GO:0005737|GO:0009296|GO:0005932|GO:0005856|GO:0007601|GO:0050896	NM_152384	Hs.233398
A_24_P935986	0.00794791	4.03161	up	8.66127	10.6726	BCAT1	Homo sapiens branched chain amino-acid transaminase 1, cytosolic (BCAT1), transcript variant 1, mRNA [NM_005504]	24964511	chr12	24964452	-	FALSE	hs|12p12.1	586	NM_005504	branched chain amino-acid transaminase 1, cytosolic	chr12:24964511-24964452	GO:0008283|GO:0052656|GO:0004084|GO:0052654|GO:0052655|GO:0009083|GO:0005829|GO:0042802|GO:0005739|GO:0034641|GO:0000082|GO:0005737|GO:0009082|GO:0016740	NM_005504	Hs.438993
A_33_P3352873	0.000343	2.04834	down	8.08279	7.04834	BCKDHB	Homo sapiens branched chain keto acid dehydrogenase E1, beta polypeptide (BCKDHB), nuclear gene encoding mitochondrial protein, transcript variant 2, mRNA [NM_000056]	80878655	chr6	80878596	+	FALSE	hs|6q14.1	594	NM_000056	branched chain keto acid dehydrogenase E1, beta polypeptide	chr6:80878596-80878655	GO:0003863|GO:0005515|GO:0007584|GO:0009083|GO:0051384|GO:0003824|GO:0051591|GO:0032403|GO:0003826|GO:0005739|GO:0034641|GO:0005759|GO:0016831|GO:0005947	NM_000056	Hs.654441
A_24_P203056	0.00796533	2.31845	up	8.36211	9.57528	BCL7A	Homo sapiens B-cell CLL/lymphoma 7A (BCL7A), transcript variant 1, mRNA [NM_020993]	122499817	chr12	122499758	+	FALSE	hs|12q24.31	605	NM_020993	B-cell CLL/lymphoma 7A	chr12:122499758-122499817	GO:0003674|GO:0005575|GO:0045892	NM_020993	Hs.530970
A_23_P34126	6.46e-05	2.96993	up	7.24547	8.8159	BGN	Homo sapiens biglycan (BGN), mRNA [NM_001711]	152773992	chrX	152773933	+	FALSE	hs|Xq28	633	NM_001711	biglycan	chrX:152773933-152773992	GO:0031012|GO:0030133|GO:0008150|GO:0001974|GO:0005578|GO:0005576|GO:0005201	NM_001711	Hs.821
A_23_P88630	0.00766757	3.1184	up	7.96698	9.60778	BLM	Homo sapiens Bloom syndrome, RecQ helicase-like (BLM), mRNA [NM_000057]	91358554	chr15	91358495	+	FALSE	hs|15q26.1	641	NM_000057	Bloom syndrome, RecQ helicase-like	chr15:91358495-91358554	GO:0005515|GO:0005657|GO:0046632|GO:0016818|GO:0051259|GO:0005622|GO:0000166|GO:0003697|GO:0046641|GO:0051782|GO:0000781|GO:0043140|GO:0000405|GO:0000733|GO:0006281|GO:0009378|GO:0045120|GO:0045893|GO:0000739|GO:0051276|GO:0006200|GO:0010165|GO:0048478|GO:0031572|GO:0005634|GO:0000079|GO:0016363|GO:0000085|GO:0002039|GO:0005737|GO:0004003|GO:0000724|GO:0016887|GO:0044237|GO:0008026|GO:0005730|GO:…	NM_000057	Hs.725208
A_24_P64344	0.0029332	3.3365	down	9.68869	7.95036	BLNK	Homo sapiens B-cell linker (BLNK), transcript variant 1, mRNA [NM_013314]	97956745	chr10	97956686	-	FALSE	hs|10q24.1	29760	NM_013314	B-cell linker	chr10:97956745-97956686	GO:0035556|GO:0005622|GO:0005737|GO:0006954|GO:0005886|GO:0006959|GO:0005070|GO:0030183|GO:0005068|GO:0007169	NM_013314	Hs.665244
A_24_P129417	1.06e-05	3.17836	up	6.31994	7.98822	BMP1	Homo sapiens bone morphogenetic protein 1 (BMP1), transcript variant 1, mRNA [NM_001199]	22054772	chr8	22054314	+	FALSE	hs|8p21.3	649	NM_001199	bone morphogenetic protein 1	chr8:22054314-22054772	GO:0006629|GO:0005509|GO:0005576|GO:0007275|GO:0005125|GO:0005615|GO:0046872|GO:0030154|GO:0001501|GO:0001503|GO:0001502|GO:0061036|GO:0042157|GO:0006508|GO:0008270|GO:0008233|GO:0004222|GO:0008083|GO:0008237	NM_001199	Hs.1274
A_23_P85922	0.000121	4.66438	up	4.60203	6.82371	BMP8A	Homo sapiens bone morphogenetic protein 8a (BMP8A), mRNA [NM_181809]	39995003	chr1	39994944	+	FALSE	hs|1p34.3	353500	NM_181809	bone morphogenetic protein 8a	chr1:39994944-39995003	GO:0001503|GO:0051216|GO:0007275|GO:0005576|GO:0040007|GO:0008083|GO:0005615|GO:0005125|GO:0030154	NM_181809	Hs.472497
A_24_P649747	0.00164645	3.23025	down	11.2856	9.59399	BMS1	Homo sapiens BMS1 homolog, ribosome assembly protein (yeast) (BMS1), mRNA [NM_014753]	43317581	chr10	43317522	+	FALSE	hs|10q11.21	9790	NM_014753	BMS1 homolog, ribosome assembly protein (yeast)	chr10:43317522-43317581	GO:0000166|GO:0042255|GO:0005730|GO:0003924|GO:0005634|GO:0005525|GO:0005524	NM_014753	Hs.10848
A_24_P85850	0.00471073	7.80227	down	9.63708	6.67318	BNIPL	Homo sapiens BCL2/adenovirus E1B 19kD interacting protein like (BNIPL), transcript variant 1, mRNA [NM_138278]	151015614	chr1	151015555	+	FALSE	hs|1q21.3	149428	NM_138278	BCL2/adenovirus E1B 19kD interacting protein like	chr1:151015555-151015614	GO:0005515|GO:0008285|GO:0006915|GO:0005634|GO:0006917|GO:0042802|GO:0040009|GO:0005829	NM_138278	Hs.591473
A_33_P3400708	0.00378712	6.93417	down	13.0416	10.2479	BNIPL	Homo sapiens BCL2/adenovirus E1B 19kD interacting protein like (BNIPL), transcript variant 2, mRNA [NM_001159642]	151020075	chr1	151020016	+	FALSE	hs|1q21.3	149428	NM_001159642	BCL2/adenovirus E1B 19kD interacting protein like	chr1:151020016-151020075	GO:0005515|GO:0008285|GO:0006915|GO:0005634|GO:0006917|GO:0042802|GO:0040009|GO:0005829	NM_001159642	Hs.591473
A_23_P207400	0.00616804	2.09449	up	7.63941	8.70601	BRCA1	Homo sapiens breast cancer 1, early onset (BRCA1), transcript variant 2, mRNA [NM_007300]	41196481	chr17	41196422	-	FALSE	hs|17q21.31	672	NM_007300	breast cancer 1, early onset	chr17:41196481-41196422	GO:0005515|GO:0043627|GO:0004842|GO:0044212|GO:0016874|GO:0009048|GO:0050681|GO:0071158|GO:0042802|GO:0005622|GO:0070531|GO:0042127|GO:0005759|GO:0031398|GO:0034446|GO:0006978|GO:0032355|GO:0031625|GO:0003713|GO:0031436|GO:0046600|GO:0051865|GO:0043234|GO:0007049|GO:0006281|GO:0007420|GO:0005654|GO:0008270|GO:0045893|GO:0019899|GO:0045892|GO:0005925|GO:0008274|GO:0016567|GO:0005886|GO:0007098|GO:…	NM_007300	Hs.194143
A_33_P3363016	0.00733028	2.15226	down	10.4338	9.32795	BRF1	Homo sapiens BRF1 homolog, subunit of RNA polymerase III transcription initiation factor IIIB (S. cerevisiae) (BRF1), transcript variant 8, mRNA [NM_001242790]	105739118	chr14	105739059	-	FALSE	hs|14q32.33	2972	NM_001242790	BRF1 homolog, subunit of RNA polymerase III transcription initiation factor IIIB (S. cerevisiae)	chr14:105739118-105739059	GO:0009304|GO:0000126|GO:0009303|GO:0003743|GO:0008270|GO:0005654|GO:0005634|GO:0045893|GO:0006384|GO:0006383|GO:0046872	NM_001242790	Hs.424484
A_33_P3353360	0.000273	2.32675	down	6.62856	5.41024	BRK1	Homo sapiens cDNA FLJ76545 complete cds, highly similar to Homo sapiens uncharacterized hematopoietic stem/progenitor cells protein MDS027 mRNA. [AK290580]	10168101	chr3	10168042	-	FALSE	hs|3p25.3	55845	AK290580	BRICK1, SCAR/WAVE actin-nucleating complex subunit	chr3:10168101-10168042	GO:0005737|GO:0005856	NA	Hs.649307
A_23_P71946	0.00748716	3.26376	down	11.8551	10.1485	BSPRY	Homo sapiens B-box and SPRY domain containing (BSPRY), mRNA [NM_017688]	116132607	chr9	116132548	+	FALSE	hs|9q32	54836	NM_017688	B-box and SPRY domain containing	chr9:116132548-116132607	GO:0005622|GO:0048471|GO:0005737|GO:0016020|GO:0008270|GO:0006816|GO:0031252|GO:0046872|GO:0006811	NM_017688	Hs.614517
A_23_P39465	0.00479855	3.64387	up	11.0061	12.8716	BST2	Homo sapiens bone marrow stromal cell antigen 2 (BST2), mRNA [NM_004335]	17514113	chr19	17514054	-	FALSE	hs|19p13.11	684	NM_004335	bone marrow stromal cell antigen 2	chr19:17514113-17514054	GO:0005794|GO:0005770|GO:0008283|GO:0007267|GO:0007275|GO:0031225|GO:0042803|GO:0007165|GO:0042113|GO:0051607|GO:0044459|GO:0005887|GO:0045087|GO:0006959|GO:0004871|GO:0043123	NM_004335	Hs.118110
A_33_P3220911	0.00316015	4.04177	up	11.9311	13.9461	BST2	bone marrow stromal cell antigen 2 [Source:HGNC Symbol;Acc:1119] [ENST00000252593]	17513807	chr19	17513748	-	FALSE	hs|19p13.11	684	CR591045	bone marrow stromal cell antigen 2	chr19:17513807-17513748	GO:0005794|GO:0005770|GO:0008283|GO:0007267|GO:0007275|GO:0031225|GO:0042803|GO:0007165|GO:0042113|GO:0051607|GO:0044459|GO:0005887|GO:0045087|GO:0006959|GO:0004871|GO:0043123	NA	Hs.118110
A_23_P419714	0.00348006	2.72598	down	10.2691	8.82233	BTBD11	Homo sapiens BTB (POZ) domain containing 11 (BTBD11), transcript variant a, mRNA [NM_001018072]	108052938	chr12	108052879	+	FALSE	hs|12q23.3	121551	NM_001018072	BTB (POZ) domain containing 11	chr12:108052879-108052938	GO:0016020|GO:0016021|GO:0003677	NM_001018072	Hs.271272
A_33_P3312182	0.00405369	3.82441	down	8.43964	6.5044	C10orf47	Homo sapiens chromosome 10 open reading frame 47 (C10orf47), mRNA [NM_153256]	11912405	chr10	11912346	+	FALSE	hs|10p14	254427	NM_153256	chromosome 10 open reading frame 47	chr10:11912346-11912405	NA	NM_153256	Hs.435775
A_33_P3280779	0.000824	2.49598	down	7.86518	6.54557	C10orf57	Homo sapiens chromosome 10 open reading frame 57 (C10orf57), mRNA [NM_025125]	81850694	chr10	81850635	+	FALSE	hs|10q22.3	80195	NM_025125	chromosome 10 open reading frame 57	chr10:81850635-81850694	GO:0016020|GO:0016021	NM_025125	Hs.169982
A_23_P313223	0.0076626	2.03748	up	6.5869	7.61368	C11orf84	Homo sapiens chromosome 11 open reading frame 84 (C11orf84), mRNA [NM_138471]	63595009	chr11	63594950	+	FALSE	hs|11q13.1	144097	NM_138471	chromosome 11 open reading frame 84	chr11:63594950-63595009	NA	NM_138471	Hs.502793
A_32_P163089	0.00549766	2.9265	up	9.23417	10.7834	C12orf75	Homo sapiens chromosome 12 open reading frame 75 (C12orf75), mRNA [NM_001145199]	105761274	chr12	105760440	+	FALSE	hs|12q23.3	387882	NM_001145199	chromosome 12 open reading frame 75	chr12:105760440-105761274	NA	NM_001145199	Hs.368938
A_23_P372771	0.00917652	2.00986	down	8.34837	7.34127	C15orf17	Homo sapiens chromosome 15 open reading frame 17 (C15orf17), mRNA [NM_020447]	75193321	chr15	75193262	-	FALSE	hs|15q24.1	57184	NM_020447	chromosome 15 open reading frame 17	chr15:75193321-75193262	GO:0004129	NM_020447	Hs.367690
A_33_P3361758	0.0050948	6.5407	up	4.62531	7.33476	C15orf33	Homo sapiens chromosome 15 open reading frame 33 (C15orf33), mRNA [NM_152647]	49624037	chr15	49623978	-	FALSE	hs|15q21.2	196951	NM_152647	chromosome 15 open reading frame 33	chr15:49624037-49623978	NA	NM_152647	Hs.712959
A_23_P26024	0.00135997	3.7026	down	14.0675	12.179	C15orf48	Homo sapiens chromosome 15 open reading frame 48 (C15orf48), transcript variant 2, mRNA [NM_032413]	45725354	chr15	45725295	+	FALSE	hs|15q21.1	84419	NM_032413	chromosome 15 open reading frame 48	chr15:45725295-45725354	GO:0005739|GO:0005634	NM_032413	Hs.112242
A_23_P163467	0.00859996	2.80749	down	12.6131	11.1238	C15orf52	Homo sapiens chromosome 15 open reading frame 52 (C15orf52), mRNA [NM_207380]	40623743	chr15	40623684	-	FALSE	hs|15q15.1	388115	NM_207380	chromosome 15 open reading frame 52	chr15:40623743-40623684	NA	NM_207380	Hs.32433
A_32_P183970	0.00138932	11.0412	down	8.67066	5.20584	C15orf62	Homo sapiens chromosome 15 open reading frame 62 (C15orf62), mRNA [NM_001130448]	41064345	chr15	41064286	+	FALSE	hs|15q15.1	643338	NM_001130448	chromosome 15 open reading frame 62	chr15:41064286-41064345	GO:0005739	NM_001130448	Hs.631715
A_24_P107941	0.00132251	2.33656	up	11.6973	12.9217	C16orf57	Homo sapiens chromosome 16 open reading frame 57 (C16orf57), transcript variant 1, mRNA [NM_024598]	58055485	chr16	58055426	+	FALSE	hs|16q21	79650	NM_024598	chromosome 16 open reading frame 57	chr16:58055426-58055485	GO:0008150|GO:0003674|GO:0005575	NM_024598	Hs.408702
A_23_P26557	0.00541926	3.37178	up	8.46027	10.2138	C16orf59	Homo sapiens chromosome 16 open reading frame 59 (C16orf59), mRNA [NM_025108]	2514854	chr16	2514795	+	FALSE	hs|16p13.3	80178	NM_025108	chromosome 16 open reading frame 59	chr16:2514795-2514854	NA	NM_025108	Hs.534491
A_23_P129476	0.00787943	2.62626	down	11.7558	10.3628	C16orf7	Homo sapiens chromosome 16 open reading frame 7 (C16orf7), mRNA [NM_004913]	89773869	chr16	89773810	-	FALSE	hs|16q24.3	9605	NM_004913	chromosome 16 open reading frame 7	chr16:89773869-89773810	GO:0005215|GO:0015986|GO:0005096	NM_004913	Hs.164410
A_32_P75902	0.00879949	4.84134	down	8.74506	6.46965	C16orf73	Homo sapiens chromosome 16 open reading frame 73 (C16orf73), transcript variant 2, mRNA [NM_152764]	1884158	chr16	1884099	-	FALSE	hs|16p13.3	254528	NM_152764	chromosome 16 open reading frame 73	chr16:1884158-1884099	GO:0005737|GO:0007126	NM_152764	Hs.729604
A_24_P289178	0.000795	2.94664	up	7.66947	9.22854	C16orf74	Homo sapiens chromosome 16 open reading frame 74 (C16orf74), mRNA [NM_206967]	85741285	chr16	85741226	-	FALSE	hs|16q24.1	404550	NM_206967	chromosome 16 open reading frame 74	chr16:85741285-85741226	NA	NM_206967	Hs.461655
A_33_P3247057	0.00479122	7.11369	down	12.7381	9.90746	C17orf109	Homo sapiens chromosome 17 open reading frame 109 (C17orf109), transcript variant 1, mRNA [NM_001162995]	73637484	chr17	73637425	+	FALSE	hs|17q25.1	643008	NM_001162995	chromosome 17 open reading frame 109	chr17:73637425-73637484	GO:0016020|GO:0016021	NM_001162995	Hs.528605
A_23_P345361	0.00271462	2.4718	down	10.5705	9.26489	C18orf25	Homo sapiens chromosome 18 open reading frame 25 (C18orf25), transcript variant 1, mRNA [NM_145055]	43846398	chr18	43846339	+	FALSE	hs|18q21.1	147339	NM_145055	chromosome 18 open reading frame 25	chr18:43846339-43846398	NA	NM_145055	Hs.116486
A_23_P380309	0.000432	16.337	down	6.91043	2.88036	C18orf26	Homo sapiens chromosome 18 open reading frame 26 (C18orf26), mRNA [NM_173629]	52266592	chr18	52266533	+	FALSE	hs|18q21.2	284254	NM_173629	chromosome 18 open reading frame 26	chr18:52266533-52266592	GO:0016020|GO:0016021	NM_173629	Hs.376146
A_23_P390068	0.00294155	9.04665	up	5.12601	8.30339	C19orf21	Homo sapiens chromosome 19 open reading frame 21 (C19orf21), mRNA [NM_173481]	763833	chr19	763774	+	FALSE	hs|19p13.3	126353	NM_173481	chromosome 19 open reading frame 21	chr19:763774-763833	NA	NM_173481	Hs.439180
A_23_P897	0.00163224	5.47691	down	11.7628	9.30944	C1orf116	Homo sapiens chromosome 1 open reading frame 116 (C1orf116), transcript variant 1, mRNA [NM_023938]	207192288	chr1	207192229	-	FALSE	hs|1q32.1	79098	NM_023938	chromosome 1 open reading frame 116	chr1:207192288-207192229	GO:0005737|GO:0005886|GO:0004872	NM_023938	Hs.32417
A_23_P160537	0.00841122	2.2826	up	7.79722	8.9879	C1orf135	Homo sapiens chromosome 1 open reading frame 135 (C1orf135), mRNA [NM_024037]	26160615	chr1	26160556	-	FALSE	hs|1p36.11	79000	NM_024037	chromosome 1 open reading frame 135	chr1:26160615-26160556	NA	NM_024037	Hs.725400
A_32_P182299	0.00930606	5.47925	down	5.26332	2.80935	C1orf168	Homo sapiens chromosome 1 open reading frame 168 (C1orf168), mRNA [NM_001004303]	57185277	chr1	57185218	-	FALSE	hs|1p32.2	199920	NM_001004303	chromosome 1 open reading frame 168	chr1:57185277-57185218	NA	NM_001004303	Hs.437655
A_24_P94319	0.00132645	4.74263	down	8.48117	6.23548	C1orf177	Homo sapiens chromosome 1 open reading frame 177 (C1orf177), transcript variant 1, mRNA [NM_152607]	55280654	chr1	55280595	+	FALSE	hs|1p32.3	163747	NM_152607	chromosome 1 open reading frame 177	chr1:55280595-55280654	NA	NM_152607	Hs.376018
A_23_P125977	0.00269752	2.56125	up	8.51251	9.86936	C1QC	Homo sapiens complement component 1, q subcomponent, C chain (C1QC), transcript variant 2, mRNA [NM_172369]	22974148	chr1	22974089	+	FALSE	hs|1p36.12	714	NM_172369	complement component 1, q subcomponent, C chain	chr1:22974089-22974148	GO:0006956|GO:0006955|GO:0005581|GO:0045087|GO:0006958|GO:0030853|GO:0005576|GO:0045650	NM_172369	Hs.467753
A_23_P259292	0.000774	2.37789	up	8.77	10.0197	C1QTNF5	Homo sapiens C1q and tumor necrosis factor related protein 5 (C1QTNF5), mRNA [NM_015645]	119209954	chr11	119209895	-	FALSE	hs|11q23.3	114902	NM_015645	C1q and tumor necrosis factor related protein 5	chr11:119209954-119209895	GO:0005581|GO:0005576	NM_015645	Hs.632102
A_24_P211565	3.3e-05	4.97985	up	7.83239	10.1485	C1QTNF6	Homo sapiens C1q and tumor necrosis factor related protein 6 (C1QTNF6), transcript variant 1, mRNA [NM_031910]	37576349	chr22	37576290	-	FALSE	hs|22q12.3	114904	NM_031910	C1q and tumor necrosis factor related protein 6	chr22:37576349-37576290	GO:0005581|GO:0005576	NM_031910	Hs.22011
A_32_P190769	0.0070777	4.36487	down	6.62022	4.49428	C1QTNF7	Homo sapiens C1q and tumor necrosis factor related protein 7 (C1QTNF7), transcript variant 3, mRNA [NM_031911]	15446785	chr4	15446726	+	FALSE	hs|4p15.32	114905	NM_031911	C1q and tumor necrosis factor related protein 7	chr4:15446726-15446785	GO:0005581|GO:0051260|GO:0005576|GO:0005615	NM_031911	Hs.153714
A_33_P3240244	0.00317158	2.14268	up	5.33275	6.43217	C2CD4D	Homo sapiens C2 calcium-dependent domain containing 4D (C2CD4D), mRNA [NM_001136003]	151810645	chr1	151810586	-	FALSE	hs|1q21.3	100191040	NM_001136003	C2 calcium-dependent domain containing 4D	chr1:151810645-151810586	NA	NM_001136003	Hs.694717
A_33_P3289121	0.00132374	5.21836	down	11.2533	8.86971	C2orf40	Homo sapiens chromosome 2 open reading frame 40 (C2orf40), mRNA [NM_032411]	106694522	chr2	106694463	+	FALSE	hs|2q12.2	84417	NM_032411	chromosome 2 open reading frame 40	chr2:106694463-106694522	GO:0030133|GO:0008054|GO:0005576|GO:0031410|GO:0005615|GO:0070314|GO:0090398	NM_032411	Hs.43125
A_33_P3286372	0.00753473	3.77147	up	4.04316	5.95829	C2orf48	chromosome 2 open reading frame 48 [Source:HGNC Symbol;Acc:26322] [ENST00000381786]	10351532	chr2	10351473	+	FALSE	hs|2p25.1	348738	AK057831	chromosome 2 open reading frame 48	chr2:10351473-10351532	NA	NA	Hs.676025
A_23_P60990	0.00340933	24.0875	down	12.9749	8.38465	C2orf54	Homo sapiens chromosome 2 open reading frame 54 (C2orf54), transcript variant 2, mRNA [NM_024861]	241826137	chr2	241826078	-	FALSE	hs|2q37.3	79919	NM_024861	chromosome 2 open reading frame 54	chr2:241826137-241826078	NA	NM_024861	Hs.193745
A_23_P29655	0.0077843	2.26185	down	10.4388	9.26129	C3orf14	Homo sapiens chromosome 3 open reading frame 14 (C3orf14), mRNA [NM_020685]	62319145	chr3	62319086	+	FALSE	hs|3p14.2	57415	NM_020685	chromosome 3 open reading frame 14	chr3:62319086-62319145	NA	NM_020685	Hs.47166
A_33_P3316835	0.00779571	2.34451	up	6.54109	7.77038	C4orf21	chromosome 4 open reading frame 21 [Source:HGNC Symbol;Acc:25654] [ENST00000264370]	113527199	chr4	113527140	-	FALSE	hs|4q25	55345	AK002193	chromosome 4 open reading frame 21	chr4:113527199-113527140	GO:0016020|GO:0008270|GO:0016021	NA	Hs.380346
A_23_P213166	0.00813966	2.22489	up	7.37899	8.53273	C4orf21	Homo sapiens chromosome 4 open reading frame 21 (C4orf21), mRNA [NM_018392]	113460845	chr4	113460786	-	FALSE	hs|4q25	55345	NM_018392	chromosome 4 open reading frame 21	chr4:113460845-113460786	GO:0016020|GO:0008270|GO:0016021	NM_018392	Hs.380346
A_33_P3285824	0.00449218	2.62859	down	15.1208	13.7265	C4orf3	Homo sapiens chromosome 4 open reading frame 3 (C4orf3), transcript variant 1, mRNA [NM_001170330]	120221550	chr4	120221491	-	FALSE	hs|4q26	401152	NM_001170330	chromosome 4 open reading frame 3	chr4:120221550-120221491	GO:0016020|GO:0016021	NM_001170330	Hs.173705
A_33_P3377691	0.0090337	2.01938	up	7.74895	8.76286	C4orf46	Homo sapiens chromosome 4 open reading frame 46 (C4orf46), mRNA [NM_001008393]	159589571	chr4	159589512	-	FALSE	hs|4q32.1	201725	NM_001008393	chromosome 4 open reading frame 46	chr4:159589571-159589512	NA	NM_001008393	Hs.380920
A_24_P149124	0.00108607	2.59343	up	11.5641	12.939	C5orf13	Homo sapiens chromosome 5 open reading frame 13 (C5orf13), transcript variant 1, mRNA [NM_004772]	111065150	chr5	111065091	-	FALSE	hs|5q22.1	9315	NM_004772	chromosome 5 open reading frame 13	chr5:111065150-111065091	GO:0031103|GO:0005737|GO:0045664|GO:0005634|GO:0017015	NM_004772	Hs.36053
A_33_P3391290	0.00621938	2.38073	up	6.02317	7.27458	C5orf13	Homo sapiens chromosome 5 open reading frame 13 (C5orf13), transcript variant 11, mRNA [NM_001142483]	111066427	chr5	111066368	-	FALSE	hs|5q22.1	9315	NM_001142483	chromosome 5 open reading frame 13	chr5:111066427-111066368	GO:0031103|GO:0005737|GO:0045664|GO:0005634|GO:0017015	NM_001142483	Hs.36053
A_23_P92928	0.00770268	2.25705	down	4.14879	2.97435	C6	Homo sapiens complement component 6 (C6), transcript variant 1, mRNA [NM_000065]	41142971	chr5	41142912	-	FALSE	hs|5p13.1	729	NM_000065	complement component 6	chr5:41142971-41142912	GO:0005515|GO:0006919|GO:0001970|GO:0005576|GO:0006917|GO:0001701|GO:0005615|GO:0045766|GO:0006956|GO:0005579|GO:0045087|GO:0006958|GO:0019835	NM_000065	Hs.481992
A_32_P218355	0.00092	4.94288	down	13.5845	11.2792	C6orf132	Homo sapiens chromosome 6 open reading frame 132 (C6orf132), mRNA [NM_001164446]	42070638	chr6	42070579	-	FALSE	hs|6p21.1	647024	NM_001164446	chromosome 6 open reading frame 132	chr6:42070638-42070579	NA	NM_001164446	Hs.444277
A_33_P3413855	0.00647098	2.3243	down	7.65938	6.44258	C7orf60	Homo sapiens chromosome 7 open reading frame 60 (C7orf60), mRNA [NM_152556]	112462336	chr7	112462277	-	FALSE	hs|7q31.1	154743	NM_152556	chromosome 7 open reading frame 60	chr7:112462336-112462277	NA	NM_152556	Hs.489734
A_23_P20022	0.00615708	2.83515	down	13.0003	11.4969	C7orf68	Homo sapiens chromosome 7 open reading frame 68 (C7orf68), transcript variant 1, mRNA [NM_013332]	128098440	chr7	128098381	+	FALSE	hs|7q32.1	29923	NM_013332	chromosome 7 open reading frame 68	chr7:128098381-128098440	GO:0008284|GO:0016020|GO:0009986|GO:0006950|GO:0005102|GO:0035425|GO:0016021|GO:0030141|GO:0005615	NM_013332	Hs.706124
A_24_P88031	0.0052448	5.39384	down	10.6421	8.21075	C8orf33	Homo sapiens chromosome 8 open reading frame 33 (C8orf33), mRNA [NM_023080]	146280296	chr8	146280237	+	FALSE	hs|8q24.3	65265	NM_023080	chromosome 8 open reading frame 33	chr8:146280237-146280296	NA	NM_023080	Hs.169615
A_23_P353614	0.00803998	2.5419	down	4.64902	3.30312	C8orf46	Homo sapiens chromosome 8 open reading frame 46 (C8orf46), mRNA [NM_152765]	67430418	chr8	67430359	+	FALSE	hs|8q13.1	254778	NM_152765	chromosome 8 open reading frame 46	chr8:67430359-67430418	NA	NM_152765	Hs.268869
A_23_P369641	0.00367393	2.27998	down	9.56202	8.373	C8orf73	Homo sapiens chromosome 8 open reading frame 73 (C8orf73), mRNA [NM_001100878]	144648965	chr8	144648906	-	FALSE	hs|8q24.3	642475	NM_001100878	chromosome 8 open reading frame 73	chr8:144648965-144648906	GO:0005488	NM_001100878	Hs.531406
A_33_P3318668	0.00335679	15.3311	down	14.5948	10.6564	C9orf169	Homo sapiens chromosome 9 open reading frame 169 (C9orf169), mRNA [NM_199001]	140120762	chr9	140120703	+	FALSE	hs|9q34.3	375791	NM_199001	chromosome 9 open reading frame 169	chr9:140120703-140120762	NA	NM_199001	Hs.512469
A_33_P3380056	0.00297549	2.84559	up	6.10072	7.60945	C9orf30	Homo sapiens chromosome 9 open reading frame 30 (C9orf30), transcript variant 4, mRNA [NM_001198807]	103207512	chr9	103207453	+	FALSE	hs|9q31.1	91283	NM_001198807	chromosome 9 open reading frame 30	chr9:103207453-103207512	GO:0042802	NM_001198807	Hs.530272
A_32_P122754	0.00024	2.11147	up	8.32668	9.40493	C9orf30	Homo sapiens chromosome 9 open reading frame 30 (C9orf30), transcript variant 1, mRNA [NM_080655]	103213110	chr9	103213052	+	FALSE	hs|9q31.1	91283	NM_080655	chromosome 9 open reading frame 30	chr9:103213052-103213110	GO:0042802	NM_080655	Hs.530272
A_33_P3254073	0.00633914	2.86326	down	4.89467	3.37701	C9orf68	chromosome 9 open reading frame 68 [Source:HGNC Symbol;Acc:25472] [ENST00000471669]	4646514	chr9	4646455	-	FALSE	hs|9p24.1	55064	NA	chromosome 9 open reading frame 68	chr9:4646514-4646455	NA	NA	NA
A_23_P32135	0.00901291	2.04608	down	8.42842	7.39555	C9orf9	Homo sapiens chromosome 9 open reading frame 9 (C9orf9), mRNA [NM_018956]	135763718	chr9	135762941	+	FALSE	hs|9q34.13	11092	NM_018956	chromosome 9 open reading frame 9	chr9:135762941-135763718	NA	NM_018956	Hs.62595
A_33_P3417260	0.00217775	2.58402	down	10.955	9.58537	C9orf95	Homo sapiens chromosome 9 open reading frame 95 (C9orf95), transcript variant 1, mRNA [NM_017881]	77681733	chr9	77681674	-	FALSE	hs|9q21.13	54981	NM_017881	chromosome 9 open reading frame 95	chr9:77681733-77681674	GO:0000166|GO:0019363|GO:0050262|GO:0005524|GO:0046872|GO:0016740	NM_017881	Hs.494186
A_23_P381714	0.00272971	3.94063	down	10.2035	8.22507	CA13	Homo sapiens carbonic anhydrase XIII (CA13), mRNA [NM_198584]	86196024	chr8	86195965	+	FALSE	hs|8q21.2	377677	NM_198584	carbonic anhydrase XIII	chr8:86195965-86196024	GO:0008270|GO:0004089|GO:0006730|GO:0046872|GO:0016829	NM_198584	Hs.127189
A_24_P56363	0.00357354	3.32395	down	9.63032	7.89742	CAB39L	Homo sapiens calcium binding protein 39-like (CAB39L), transcript variant 1, mRNA [NM_030925]	49883274	chr13	49883215	-	FALSE	hs|13q14.2	81617	NM_030925	calcium binding protein 39-like	chr13:49883274-49883215	GO:0008286|GO:0005515|GO:0007050|GO:0046320|GO:0005829	NM_030925	Hs.87159
A_23_P122815	0.000358	2.51315	up	9.76806	11.0976	CALU	Homo sapiens calumenin (CALU), transcript variant 1, mRNA [NM_001219]	128410428	chr7	128410369	+	FALSE	hs|7q32.1	813	NM_001219	calumenin	chr7:128410369-128410428	GO:0005515|GO:0042470|GO:0008150|GO:0005794|GO:0007596|GO:0005783|GO:0005509|GO:0002576|GO:0033018|GO:0030168|GO:0005788|GO:0005576	NM_001219	Hs.592258
A_33_P3244283	0.00810527	3.66126	up	6.92489	8.79723	CAMK2N2	Homo sapiens calcium/calmodulin-dependent protein kinase II inhibitor 2 (CAMK2N2), mRNA [NM_033259]	183977062	chr3	183977003	-	FALSE	hs|3q27.1	94032	NM_033259	calcium/calmodulin-dependent protein kinase II inhibitor 2	chr3:183977062-183977003	GO:0005737|GO:0004860|GO:0005634|GO:0005829	NM_033259	Hs.585003
A_23_P138835	0.00279227	2.02939	down	11.5619	10.5408	CAPN1	Homo sapiens calpain 1, (mu/I) large subunit (CAPN1), transcript variant 2, mRNA [NM_005186]	64978326	chr11	64977906	+	FALSE	hs|11q13.1	823	NM_005186	calpain 1, (mu/I) large subunit	chr11:64977906-64978326	GO:0005622|GO:0005515|GO:0008284|GO:0005737|GO:0004198|GO:0005886|GO:0005509|GO:0006508|GO:0008233	NM_005186	Hs.502842
A_32_P167076	0.00447167	25.378	down	13.488	8.82248	CAPN14	Homo sapiens calpain 14 (CAPN14), mRNA [NM_001145122]	31396260	chr2	31396201	-	FALSE	hs|2p23.1	440854	NM_001145122	calpain 14	chr2:31396260-31396201	GO:0005622|GO:0004198|GO:0005509|GO:0006508|GO:0008233	NM_001145122	Hs.468059
A_33_P3393170	0.00197122	4.18406	down	12.0532	9.98826	CAPN5	Homo sapiens calpain 5 (CAPN5), mRNA [NM_004055]	76837196	chr11	76837137	+	FALSE	hs|11q13.5	726	NM_004055	calpain 5	chr11:76837137-76837196	GO:0005622|GO:0007165|GO:0001541|GO:0004198|GO:0006508|GO:0001553|GO:0008233|GO:0060014	NM_004055	Hs.248153
A_23_P152406	0.00188358	3.52858	down	12.9551	11.136	CAPNS2	Homo sapiens calpain, small subunit 2 (CAPNS2), mRNA [NM_032330]	55601437	chr16	55601378	+	FALSE	hs|16q12.2	84290	NM_032330	calpain, small subunit 2	chr16:55601378-55601437	GO:0005737|GO:0005886|GO:0005509	NM_032330	Hs.660027
A_23_P207879	0.00787642	2.94944	down	10.5698	9.00938	CARD14	Homo sapiens caspase recruitment domain family, member 14 (CARD14), transcript variant 1, mRNA [NM_024110]	78182692	chr17	78182633	+	FALSE	hs|17q25.3	79092	NM_024110	caspase recruitment domain family, member 14	chr17:78182633-78182692	GO:0050700|GO:0005622|GO:0005737|GO:0016235|GO:0007250|GO:0005886|GO:0001934|GO:0042981	NM_024110	Hs.696253
A_23_P100127	0.00956995	2.49783	up	8.13781	9.45849	CASC5	Homo sapiens cancer susceptibility candidate 5 (CASC5), transcript variant 1, mRNA [NM_170589]	40917584	chr15	40917525	+	FALSE	hs|15q15.1	57082	NM_170589	cancer susceptibility candidate 5	chr15:40917525-40917584	GO:0005515|GO:0000236|GO:0001675|GO:0001669|GO:0005694|GO:0006334|GO:0005634|GO:0005829|GO:0034080|GO:0007059|GO:0000087|GO:0071173|GO:0000777|GO:0005654|GO:0008608|GO:0000278|GO:0051301	NM_170589	Hs.181855
A_23_P434352	0.00630741	2.67068	down	14.5515	13.1343	CAST	Homo sapiens calpastatin (CAST), transcript variant 6, mRNA [NM_001042440]	96108476	chr5	96108417	+	FALSE	hs|5q15	831	NM_001042440	calpastatin	chr5:96108417-96108476	GO:0010951|GO:0005515|GO:0010859|GO:0004866	NM_001042440	Hs.436186
A_23_P55421	0.00421851	2.40365	up	6.82513	8.09036	CBX8	Homo sapiens chromobox homolog 8 (CBX8), mRNA [NM_020649]	77768401	chr17	77768342	-	FALSE	hs|17q25.3	57332	NM_020649	chromobox homolog 8	chr17:77768401-77768342	GO:0000792|GO:0031519|GO:0000790|GO:0003727|GO:0004842|GO:0006355|GO:0016574|GO:0005730|GO:0000151|GO:0005634|GO:0000122|GO:0035064|GO:0016568	NM_020649	Hs.387258
A_23_P73540	0.0030845	2.6291	down	10.8754	9.48087	CCDC120	Homo sapiens coiled-coil domain containing 120 (CCDC120), transcript variant 3, mRNA [NM_033626]	48927392	chrX	48927333	+	FALSE	hs|Xp11.23	90060	NM_033626	coiled-coil domain containing 120	chrX:48927333-48927392	GO:0005515	NM_033626	Hs.522643
A_33_P3328716	0.00402338	3.20561	down	6.46012	4.77952	CCDC13	Homo sapiens coiled-coil domain containing 13 (CCDC13), mRNA [NM_144719]	42749934	chr3	42749875	-	FALSE	hs|3p22.1	152206	NM_144719	coiled-coil domain containing 13	chr3:42749934-42749875	NA	NM_144719	Hs.604182
A_33_P3257297	0.00669433	2.0583	up	4.00454	5.046	CCDC147	Homo sapiens coiled-coil domain containing 147 (CCDC147), mRNA [NM_001008723]	106214835	chr10	106214776	+	FALSE	hs|10q25.1	159686	NM_001008723	coiled-coil domain containing 147	chr10:106214776-106214835	NA	NM_001008723	Hs.253576
A_23_P71300	0.00688199	2.76036	down	10.119	8.65412	CCDC25	Homo sapiens coiled-coil domain containing 25 (CCDC25), mRNA [NM_018246]	27591203	chr8	27591144	-	FALSE	hs|8p21.1	55246	NM_018246	coiled-coil domain containing 25	chr8:27591203-27591144	NA	NM_018246	Hs.445512
A_33_P3313801	0.00416978	2.39943	up	3.0208	4.28349	CCDC34	Homo sapiens coiled-coil domain containing 34 (CCDC34), transcript variant 2, mRNA [NM_080654]	27371878	chr11	27371819	-	FALSE	hs|11p14.1	91057	NM_080654	coiled-coil domain containing 34	chr11:27371878-27371819	NA	NM_080654	Hs.143733
A_33_P3335590	0.00918117	3.25361	down	13.8895	12.1874	CCDC64B	Homo sapiens coiled-coil domain containing 64B (CCDC64B), mRNA [NM_001103175]	3077927	chr16	3077868	-	FALSE	hs|16p13.3	146439	NM_001103175	coiled-coil domain containing 64B	chr16:3077927-3077868	GO:0017137	NM_001103175	Hs.513285
A_23_P61524	0.00677773	3.17946	down	7.67488	6.0061	CCDC71	Homo sapiens coiled-coil domain containing 71 (CCDC71), mRNA [NM_022903]	49200268	chr3	49200209	-	FALSE	hs|3p21.31	64925	NM_022903	coiled-coil domain containing 71	chr3:49200268-49200209	NA	NM_022903	Hs.211472
A_23_P78037	0.00693026	6.44053	up	2.83436	5.52154	CCL7	Homo sapiens chemokine (C-C motif) ligand 7 (CCL7), mRNA [NM_006273]	32598859	chr17	32598800	+	FALSE	hs|17q12	6354	NM_006273	chemokine (C-C motif) ligand 7	chr17:32598800-32598859	GO:0008009|GO:0007165|GO:0006955|GO:0006954|GO:0006935|GO:0007267|GO:0006874|GO:0005576|GO:0008201|GO:0005615	NM_006273	Hs.251526
A_23_P65757	0.00972848	2.59094	up	10.7516	12.125	CCNB2	Homo sapiens cyclin B2 (CCNB2), mRNA [NM_004701]	59417198	chr15	59417139	+	FALSE	hs|15q22.2	9133	NM_004701	cyclin B2	chr15:59417139-59417198	GO:0005515|GO:0005813|GO:0019901|GO:0010389|GO:0005624|GO:0048538|GO:0005634|GO:0000079|GO:0001701|GO:0005829|GO:0007067|GO:0000086|GO:0015630|GO:0000075|GO:0043029|GO:0000278|GO:0040007|GO:0051301	NM_004701	Hs.194698
A_33_P3385870	0.00132763	3.27094	down	9.44332	7.73362	CCNG2	Homo sapiens cyclin G2 (CCNG2), mRNA [NM_004354]	78087216	chr4	78087157	+	FALSE	hs|4q21.1	901	NM_004354	cyclin G2	chr4:78087157-78087216	GO:0007067|GO:0007049|GO:0005737|GO:0000075|GO:0051301	NM_004354	Hs.13291
A_24_P734720	0.000263	2.93819	down	8.97601	7.42108	CCNYL1	Homo sapiens cyclin Y-like 1 (CCNYL1), transcript variant 2, mRNA [NM_152523]	208619079	chr2	208619020	+	FALSE	hs|2q33.3	151195	NM_152523	cyclin Y-like 1	chr2:208619020-208619079	GO:0019901|GO:0000079	NM_152523	Hs.471234
A_23_P6909	0.00387739	2.09634	up	7.21504	8.28291	CCRL1	Homo sapiens chemokine (C-C motif) receptor-like 1 (CCRL1), transcript variant 1, mRNA [NM_178445]	132320284	chr3	132320225	+	FALSE	hs|3q22.1	51554	NM_178445	chemokine (C-C motif) receptor-like 1	chr3:132320225-132320284	GO:0006955|GO:0007186|GO:0006935|GO:0005886|GO:0005887|GO:0004930|GO:0004950|GO:0016493|GO:0004872	NM_178445	Hs.310512
A_23_P69310	0.0022902	2.96539	up	6.82273	8.39095	CCRL2	Homo sapiens chemokine (C-C motif) receptor-like 2 (CCRL2), transcript variant 1, mRNA [NM_003965]	46450781	chr3	46450722	+	FALSE	hs|3p21.31	9034	NM_003965	chemokine (C-C motif) receptor-like 2	chr3:46450722-46450781	GO:0006954|GO:0007186|GO:0006935|GO:0005886|GO:0005887|GO:0004930|GO:0048020|GO:0004950|GO:0042379|GO:0004872	NM_003965	Hs.535713
A_23_P41217	6.55e-05	2.93729	down	6.39378	4.83929	CD200R1	Homo sapiens CD200 receptor 1 (CD200R1), transcript variant 1, mRNA [NM_138806]	112642591	chr3	112642532	-	FALSE	hs|3q13.2	131450	NM_138806	CD200 receptor 1	chr3:112642591-112642532	GO:0005886|GO:0044419|GO:0050776|GO:0005576|GO:0004872|GO:0016021	NM_138806	Hs.309158
A_33_P3369844	0.00230528	3.27454	down	16.8105	15.0992	CD24	Homo sapiens CD24 molecule (CD24), mRNA [NM_013230]	21152726	chrY	21152667	-	FALSE	hs|Yq11.222	100133941	NM_013230	CD24 molecule	chrY:21152726-21152667	GO:0045730|GO:0005515|GO:0043627|GO:0005886|GO:0061098|GO:0031295|GO:0002237|GO:0031225|GO:0007204|GO:0032597|GO:0032913|GO:0042104|GO:0016337|GO:0030296|GO:0030856|GO:0043406|GO:0007411|GO:0043408|GO:0032600|GO:0004871|GO:0016055|GO:0001775|GO:0042632|GO:0001666|GO:0009986|GO:0019901|GO:0042325|GO:0001959|GO:0002768|GO:0016020|GO:0016477|GO:0045121|GO:0008629	NM_013230	Hs.644105
A_33_P3222917	3.33e-05	4.75147	up	12.1913	14.4397	CD276	Homo sapiens CD276 molecule (CD276), transcript variant 1, mRNA [NM_001024736]	74006850	chr15	74006791	+	FALSE	hs|15q24.1	80381	NM_001024736	CD276 molecule	chr15:74006791-74006850	GO:0005515|GO:0030501|GO:0008283|GO:0005102|GO:0042130|GO:0045669|GO:0045085|GO:0006955|GO:0042110|GO:0016020|GO:0045077|GO:0050728|GO:0045078|GO:0050776|GO:0042102|GO:0016021|GO:0009897	NM_001024736	Hs.77873
A_24_P305050	7.15e-05	3.00342	down	5.40431	3.81771	CD300LG	Homo sapiens CD300 molecule-like family member g (CD300LG), transcript variant 1, mRNA [NM_145273]	41940256	chr17	41940197	+	FALSE	hs|17q21.31	146894	NM_145273	CD300 molecule-like family member g	chr17:41940197-41940256	GO:0016323|GO:0016324|GO:0005886|GO:0032585|GO:0004872|GO:0016021|GO:0005768	NM_145273	Hs.147313
A_23_P126584	0.000193	2.12103	down	3.68856	2.60379	CD5L	Homo sapiens CD5 molecule-like (CD5L), mRNA [NM_005894]	157801136	chr1	157801077	-	FALSE	hs|1q23.1	922	NM_005894	CD5 molecule-like	chr1:157801136-157801077	GO:0006968|GO:0016020|GO:0006915|GO:0005576|GO:0005615|GO:0005044	NM_005894	Hs.134035
A_33_P3359781	0.00347293	3.09403	down	8.15104	6.52156	CD99	CD99 molecule [Source:HGNC Symbol;Acc:7082] [ENST00000381177]	2606256	chrY	2606197	+	FALSE	hs|Yp11.31	4267	NA	CD99 molecule	chrY:2606197-2606256	GO:0005737|GO:0005886|GO:0005887|GO:0007155	NA	NA
A_23_P34597	0.00183796	3.8782	down	10.933	8.97761	CDA	Homo sapiens cytidine deaminase (CDA), mRNA [NM_001785]	20945128	chr1	20945069	+	FALSE	hs|1p36.12	978	NM_001785	cytidine deaminase	chr1:20945069-20945128	GO:0030308|GO:0009972|GO:0045980|GO:0019858|GO:0055086|GO:0046898|GO:0005576|GO:0043097|GO:0008655|GO:0046872|GO:0042803|GO:0005829|GO:0016787|GO:0051289|GO:0001882|GO:0004126|GO:0008270|GO:0006206|GO:0007166|GO:0071217	NM_001785	Hs.466910
A_23_P385861	0.00538884	2.98633	up	8.83223	10.4106	CDCA2	Homo sapiens cell division cycle associated 2 (CDCA2), mRNA [NM_152562]	25365315	chr8	25365256	+	FALSE	hs|8p21.2	157313	NM_152562	cell division cycle associated 2	chr8:25365256-25365315	GO:0007067|GO:0007049|GO:0005737|GO:0005730|GO:0005634|GO:0051301	NM_152562	Hs.33366
A_24_P218979	0.00512313	2.0259	up	8.72518	9.74374	CDCA3	Homo sapiens cell division cycle associated 3 (CDCA3), mRNA [NM_031299]	6958498	chr12	6958315	-	FALSE	hs|12p13.31	83461	NM_031299	cell division cycle associated 3	chr12:6958498-6958315	GO:0008150|GO:0003674|GO:0007067|GO:0007049|GO:0005737|GO:0005575|GO:0051301|GO:0005829	NM_031299	Hs.524216
A_24_P274795	0.00197429	2.04428	up	9.5585	10.5901	CDCA7L	Homo sapiens cell division cycle associated 7-like (CDCA7L), transcript variant 1, mRNA [NM_018719]	21940891	chr7	21940832	-	FALSE	hs|7p15.3	55536	NM_018719	cell division cycle associated 7-like	chr7:21940891-21940832	GO:0008284|GO:0006355|GO:0005737|GO:0005730|GO:0005634	NM_018719	Hs.520245
A_23_P152305	2.25e-05	4.69076	up	8.88169	11.1115	CDH11	Homo sapiens cadherin 11, type 2, OB-cadherin (osteoblast) (CDH11), mRNA [NM_001797]	64980928	chr16	64980869	-	FALSE	hs|16q21	1009	NM_001797	cadherin 11, type 2, OB-cadherin (osteoblast)	chr16:64980928-64980869	GO:0005515|GO:0005886|GO:0034329|GO:0005509|GO:0045216|GO:0001501|GO:0005737|GO:0016337|GO:0001503|GO:0016021|GO:0007155|GO:0007156|GO:0034332	NM_001797	Hs.116471
A_32_P25357	0.00337478	3.93067	up	3.38416	5.35894	CDH15	Homo sapiens cadherin 15, type 1, M-cadherin (myotubule) (CDH15), mRNA [NM_004933]	89261898	chr16	89261839	+	FALSE	hs|16q24.3	1013	NM_004933	cadherin 15, type 1, M-cadherin (myotubule)	chr16:89261839-89261898	GO:0042692|GO:0051149|GO:0031594|GO:0005886|GO:0034329|GO:0005509|GO:0016021|GO:0007155|GO:0007156|GO:0045216|GO:0034332	NM_004933	Hs.148090
A_23_P38732	0.000282	5.2677	up	4.58287	6.98005	CDH2	Homo sapiens cadherin 2, type 1, N-cadherin (neuronal) (CDH2), mRNA [NM_001792]	25532140	chr18	25532081	-	FALSE	hs|18q12.1	1000	NM_001792	cadherin 2, type 1, N-cadherin (neuronal)	chr18:25532140-25532081	GO:0005515|GO:0008013|GO:0005886|GO:0035023|GO:0016342|GO:0016339|GO:0005916|GO:0032880|GO:0042692|GO:0005913|GO:0005911|GO:0044456|GO:0031641|GO:0007155|GO:0007156|GO:0019901|GO:0045295|GO:0045294|GO:0034329|GO:0005509|GO:0005624|GO:0007416|GO:0045216|GO:0051149|GO:0016021|GO:0050770|GO:0034332	NM_001792	Hs.464829
A_23_P202683	0.00430541	3.5732	down	5.6211	3.78388	CDHR5	Homo sapiens cadherin-related family member 5 (CDHR5), transcript variant 1, mRNA [NM_021924]	617509	chr11	617450	-	FALSE	hs|11p15.5	53841	NM_021924	cadherin-related family member 5	chr11:617509-617450	GO:0016339|GO:0005905|GO:0016020|GO:0005886|GO:0005509|GO:0016021|GO:0007155|GO:0007156	NM_021924	Hs.165619
A_24_P29733	0.00155296	3.27414	up	7.53149	9.2426	CDK14	Homo sapiens cyclin-dependent kinase 14 (CDK14), mRNA [NM_012395]	90839323	chr7	90839264	+	FALSE	hs|7q21.13	5218	NM_012395	cyclin-dependent kinase 14	chr7:90839264-90839323	GO:0005515|GO:0005886|GO:0030332|GO:0005634|GO:0005524|GO:0060828|GO:0005737|GO:0007049|GO:0000166|GO:0000086|GO:0000308|GO:0016055|GO:0004693|GO:0051301	NM_012395	Hs.258576
A_23_P24997	0.001205	2.0256	up	11.4017	12.42	CDK4	Homo sapiens cyclin-dependent kinase 4 (CDK4), mRNA [NM_000075]	58142322	chr12	58142263	-	FALSE	hs|12q14.1	1019	NM_000075	cyclin-dependent kinase 4	chr12:58142322-58142263	GO:0005515|GO:0010468|GO:0008284|GO:0005634|GO:0048146|GO:0005829|GO:0000084|GO:0000082|GO:0005737|GO:0000166|GO:0051726|GO:0000080|GO:0005667|GO:0042493|GO:0005524|GO:0007165|GO:0007049|GO:0004672|GO:0016020|GO:0000307|GO:0005654|GO:0006468|GO:0000278|GO:0004693|GO:0051301	NM_000075	Hs.95577
A_24_P166663	0.00223196	2.23655	up	10.8905	12.0517	CDK6	Homo sapiens cyclin-dependent kinase 6 (CDK6), transcript variant 1, mRNA [NM_001259]	92234502	chr7	92234443	-	FALSE	hs|7q21.2	1021	NM_001259	cyclin-dependent kinase 6	chr7:92234502-92234443	GO:0005515|GO:0010468|GO:0050680|GO:0005634|GO:0048146|GO:0005829|GO:0005737|GO:0000166|GO:0043697|GO:0000080|GO:0030097|GO:0030332|GO:0009615|GO:0045786|GO:0005524|GO:0001726|GO:0042063|GO:0007049|GO:0045668|GO:0000307|GO:0045646|GO:0006468|GO:0000278|GO:0001954|GO:0051301|GO:0004693	NM_001259	Hs.119882
A_33_P3629151	0.000655	2.18386	down	6.02963	4.90275	CDRT8	qf35h11.x1 Soares_testis_NHT Homo sapiens cDNA clone IMAGE:1752069 3', mRNA sequence [AI150443]	15008837	chr17	15008778	+	FALSE	hs|17p12	94151	AI150443	CMT1A duplicated region transcript 8	chr17:15008778-15008837	NA	NA	Hs.98684
A_23_P7250	0.00823182	2.49453	down	9.87487	8.5561	CDS1	Homo sapiens CDP-diacylglycerol synthase (phosphatidate cytidylyltransferase) 1 (CDS1), mRNA [NM_001263]	85566459	chr4	85566400	+	FALSE	hs|4q21.23	1040	NM_001263	CDP-diacylglycerol synthase (phosphatidate cytidylyltransferase) 1	chr4:85566400-85566459	GO:0006629|GO:0007165|GO:0016020|GO:0005783|GO:0004605|GO:0016779|GO:0005789|GO:0016021|GO:0008654|GO:0004142|GO:0006657|GO:0007601	NM_001263	Hs.654899
A_33_P3268507	0.00206279	5.45546	down	9.76172	7.31402	CEACAM1	Homo sapiens carcinoembryonic antigen-related cell adhesion molecule 1 (biliary glycoprotein) (CEACAM1), transcript variant 5, mRNA [NM_001184816]	43025514	chr19	43025455	-	FALSE	hs|19q13.2	634	NM_001184816	carcinoembryonic antigen-related cell adhesion molecule 1 (biliary glycoprotein)	chr19:43025514-43025455	GO:0003674|GO:0016477|GO:0005886|GO:0007229|GO:0005887|GO:0005624|GO:0005576|GO:0016021|GO:0001525|GO:0007156	NM_001184816	Hs.512682
A_24_P382319	0.00546785	4.01214	down	12.1917	10.1873	CEACAM1	Homo sapiens carcinoembryonic antigen-related cell adhesion molecule 1 (biliary glycoprotein) (CEACAM1), transcript variant 1, mRNA [NM_001712]	43011563	chr19	43011504	-	FALSE	hs|19q13.2	634	NM_001712	carcinoembryonic antigen-related cell adhesion molecule 1 (biliary glycoprotein)	chr19:43011563-43011504	GO:0003674|GO:0016477|GO:0005886|GO:0007229|GO:0005887|GO:0005624|GO:0005576|GO:0016021|GO:0001525|GO:0007156	NM_001712	Hs.512682
A_23_P130515	0.00412371	6.67014	down	8.61118	5.87346	CEACAM3	Homo sapiens carcinoembryonic antigen-related cell adhesion molecule 3 (CEACAM3), mRNA [NM_001815]	42312860	chr19	42301831	+	FALSE	hs|19q13.2	1084	NM_001815	carcinoembryonic antigen-related cell adhesion molecule 3	chr19:42301831-42312860	GO:0016020|GO:0016021	NM_001815	Hs.11
A_23_P153301	0.00376182	9.08915	down	11.7216	8.53746	CEACAM5	Homo sapiens carcinoembryonic antigen-related cell adhesion molecule 5 (CEACAM5), mRNA [NM_004363]	42225043	chr19	42224984	+	FALSE	hs|19q13.2	1048	NM_004363	carcinoembryonic antigen-related cell adhesion molecule 5	chr19:42224984-42225043	GO:0016323|GO:0005886|GO:0005887|GO:0031225	NM_004363	Hs.709196
A_23_P218442	0.00149391	7.37244	down	12.8954	10.0132	CEACAM6	Homo sapiens carcinoembryonic antigen-related cell adhesion molecule 6 (non-specific cross reacting antigen) (CEACAM6), mRNA [NM_002483]	42275493	chr19	42275434	+	FALSE	hs|19q13.2	4680	NM_002483	carcinoembryonic antigen-related cell adhesion molecule 6 (non-specific cross reacting antigen)	chr19:42275434-42275493	GO:0007165|GO:0005886|GO:0005887|GO:0007267|GO:0031225	NM_002483	Hs.466814
A_33_P3254844	0.000727	19.5298	down	8.17375	3.88614	CEACAM7	Homo sapiens carcinoembryonic antigen-related cell adhesion molecule 7 (CEACAM7), mRNA [NM_006890]	42178513	chr19	42178454	-	FALSE	hs|19q13.2	1087	NM_006890	carcinoembryonic antigen-related cell adhesion molecule 7	chr19:42178513-42178454	GO:0005886|GO:0031225|GO:0016021	NM_006890	Hs.74466
A_23_P411296	0.000308	2.26346	up	12.652	13.8305	CEBPB	Homo sapiens CCAAT/enhancer binding protein (C/EBP), beta (CEBPB), mRNA [NM_005194]	48809048	chr20	48808989	+	FALSE	hs|20q13.13	1051	NM_005194	CCAAT/enhancer binding protein (C/EBP), beta	chr20:48808989-48809048	GO:0005515|GO:0000790|GO:0003700|GO:0006366|GO:0003705|GO:0005634|GO:0045408|GO:0035259|GO:0016363|GO:0042803|GO:0005737|GO:0006955|GO:0060644|GO:0006954|GO:0045944|GO:0030182|GO:0032496|GO:0006355|GO:0046982|GO:0001892|GO:0006916|GO:0006917|GO:0006953|GO:0003677|GO:0006351|GO:0043565|GO:0033598|GO:0050873|GO:0008134	NM_005194	Hs.517106
A_33_P3535972	0.00357292	2.24781	up	4.97619	6.14471	CELF4	Homo sapiens CUGBP, Elav-like family member 4 (CELF4), transcript variant 1, mRNA [NM_020180]	34825002	chr18	34824943	-	FALSE	hs|18q12.2	56853	NM_020180	CUGBP, Elav-like family member 4	chr18:34825002-34824943	GO:0005737|GO:0042835|GO:0000166|GO:0000381|GO:0006376|GO:0005634|GO:0009790|GO:0003729|GO:0007281|GO:0000900	NM_020180	Hs.435976
A_24_P96780	0.00383981	3.12269	up	7.63204	9.27483	CENPF	Homo sapiens centromere protein F, 350/400kDa (mitosin) (CENPF), mRNA [NM_016343]	214826298	chr1	214826239	+	FALSE	hs|1q41	1063	NM_016343	centromere protein F, 350/400kDa (mitosin)	chr1:214826239-214826298	GO:0005515|GO:0000236|GO:0007094|GO:0048471|GO:0008283|GO:0005634|GO:0005635|GO:0015031|GO:0042803|GO:0030154|GO:0016363|GO:0005829|GO:0000085|GO:0005737|GO:0051382|GO:0007059|GO:0000087|GO:0016202|GO:0005856|GO:0000785|GO:0051310|GO:0005694|GO:0042493|GO:0010389|GO:0005819|GO:0030496|GO:0007275|GO:0008022|GO:0006260|GO:0000940|GO:0000922|GO:0045502|GO:0007517|GO:0003682|GO:0000776|GO:0000278|GO:…	NM_016343	Hs.497741
A_33_P3387861	0.00174973	2.27517	up	8.60553	9.7915	CENPN	Homo sapiens centromere protein N (CENPN), transcript variant 2, mRNA [NM_001100624]	81065089	chr16	81065030	+	FALSE	hs|16q23.2	55839	NM_001100624	centromere protein N	chr16:81065030-81065089	GO:0034080|GO:0000236|GO:0005694|GO:0000087|GO:0006334|GO:0000777|GO:0005654|GO:0005634|GO:0000278|GO:0005829	NM_001100624	Hs.726537
A_24_P462899	0.0027507	2.25869	up	11.4246	12.6001	CENPW	Homo sapiens centromere protein W (CENPW), mRNA [NM_001012507]	126669682	chr6	126669623	+	FALSE	hs|6q22.32	387103	NM_001012507	centromere protein W	chr6:126669623-126669682	GO:0005694|GO:0005634|GO:0003677|GO:0000775	NM_001012507	Hs.486401
A_23_P115872	0.0055193	3.07903	up	8.45452	10.077	CEP55	Homo sapiens centrosomal protein 55kDa (CEP55), transcript variant 1, mRNA [NM_018131]	95288813	chr10	95288754	+	FALSE	hs|10q23.33	55165	NM_018131	centrosomal protein 55kDa	chr10:95288754-95288813	GO:0007067|GO:0007049|GO:0005813|GO:0005737|GO:0005814|GO:0030496|GO:0005856|GO:0032154|GO:0051301	NM_018131	Hs.14559
A_33_P3260575	0.0025944	2.80774	up	10.6343	12.1237	CERCAM	Homo sapiens cerebral endothelial cell adhesion molecule (CERCAM), mRNA [NM_016174]	131199623	chr9	131199564	+	FALSE	hs|9q34.11	51148	NM_016174	cerebral endothelial cell adhesion molecule	chr9:131199564-131199623	GO:0005886|GO:0005783|GO:0007159|GO:0006928|GO:0005788|GO:0007155|GO:0009103	NM_016174	Hs.495230
A_33_P3350393	0.00195362	2.62101	down	10.3579	8.96782	CES2	Homo sapiens carboxylesterase 2 (CES2), transcript variant 1, mRNA [NM_003869]	66978729	chr16	66978670	+	FALSE	hs|16q22.1	8824	NM_003869	carboxylesterase 2	chr16:66978670-66978729	GO:0004091|GO:0016787|GO:0005783|GO:0005788|GO:0009056|GO:0080030|GO:0080031|GO:0080032	NM_003869	Hs.282975
A_23_P119562	0.00145582	4.77215	down	14.6155	12.3608	CFD	Homo sapiens complement factor D (adipsin) (CFD), mRNA [NM_001928]	863306	chr19	863247	+	FALSE	hs|19p13.3	1675	NM_001928	complement factor D (adipsin)	chr19:863247-863306	GO:0004252|GO:0030168|GO:0005576|GO:0005615|GO:0006957|GO:0006956|GO:0007219|GO:0007596|GO:0045087|GO:0002576|GO:0006508|GO:0008236|GO:0008233|GO:0031093	NM_001928	Hs.155597
A_24_P282547	0.00977433	4.05758	up	3.75754	5.77816	CFHR4	Homo sapiens complement factor H-related 4 (CFHR4), transcript variant 3, mRNA [NM_006684]	196884240	chr1	196884181	+	FALSE	hs|1q31.3	10877	NM_006684	complement factor H-related 4	chr1:196884181-196884240	GO:0006869|GO:0005576|GO:0005319	NM_006684	Hs.710100
A_24_P114617	0.00072	2.03566	down	9.16074	8.13524	CHMP2B	Homo sapiens chromatin modifying protein 2B (CHMP2B), mRNA [NM_014043]	87303757	chr3	87303698	+	FALSE	hs|3p11.2	25978	NM_014043	chromatin modifying protein 2B	chr3:87303698-87303757	GO:0005515|GO:0019904|GO:0005634|GO:0015031|GO:0005829|GO:0005622|GO:0005739|GO:0005737|GO:0016020|GO:0016197|GO:0031902|GO:0016044|GO:0005768	NM_014043	Hs.476930
A_33_P3325723	0.000698	2.90565	up	8.0493	9.58817	CHN1	Homo sapiens chimerin (chimaerin) 1 (CHN1), transcript variant 1, mRNA [NM_001822]	175664776	chr2	175664717	-	FALSE	hs|2q31.1	1123	NM_001822	chimerin (chimaerin) 1	chr2:175664776-175664717	GO:0043547|GO:0051056|GO:0007264|GO:0005070|GO:0046872|GO:0005829|GO:0005096	NM_001822	Hs.380138
A_33_P3316878	0.000183	2.39517	up	12.2365	13.4967	CHPF	Homo sapiens chondroitin polymerizing factor (CHPF), transcript variant 1, mRNA [NM_024536]	220403737	chr2	220403678	-	FALSE	hs|2q35	79586	NM_024536	chondroitin polymerizing factor	chr2:220403737-220403678	GO:0005515|GO:0005794|GO:0016758|GO:0016020|GO:0032580|GO:0016021|GO:0050510|GO:0047238|GO:0046872|GO:0016740	NM_024536	Hs.516711
A_23_P90888	0.00924482	2.30607	up	4.09248	5.29791	CHRNA1	Homo sapiens cholinergic receptor, nicotinic, alpha 1 (muscle) (CHRNA1), transcript variant 1, mRNA [NM_001039523]	175614896	chr2	175614837	-	FALSE	hs|2q31.1	1134	NM_001039523	cholinergic receptor, nicotinic, alpha 1 (muscle)	chr2:175614896-175614837	GO:0048630|GO:0005230|GO:0030054|GO:0031594|GO:0005886|GO:0007268|GO:0045202|GO:0019228|GO:0046716|GO:0050905|GO:0050881|GO:0007528|GO:0015464|GO:0045211|GO:0042391|GO:0006810|GO:0042166|GO:0004872|GO:0006811|GO:0009986|GO:0007274|GO:0005892|GO:0007165|GO:0003009|GO:0016021|GO:0070050|GO:0005216|GO:0004889	NM_001039523	Hs.434479
A_23_P98205	0.00344333	5.73495	up	5.0492	7.56898	CHST1	Homo sapiens carbohydrate (keratan sulfate Gal-6) sulfotransferase 1 (CHST1), mRNA [NM_003654]	45671095	chr11	45671036	-	FALSE	hs|11p11.2	8534	NM_003654	carbohydrate (keratan sulfate Gal-6) sulfotransferase 1	chr11:45671095-45671036	GO:0006790|GO:0045130|GO:0006954|GO:0005794|GO:0016020|GO:0005976|GO:0000139|GO:0008146|GO:0016021|GO:0006012|GO:0016740|GO:0042339	NM_003654	Hs.104576
A_23_P354297	0.00507437	2.40378	up	10.2294	11.4947	CHTF18	Homo sapiens CTF18, chromosome transmission fidelity factor 18 homolog (S. cerevisiae) (CHTF18), mRNA [NM_022092]	848004	chr16	847945	+	FALSE	hs|16p13.3	63922	NM_022092	CTF18, chromosome transmission fidelity factor 18 homolog (S. cerevisiae)	chr16:847945-848004	GO:0006260|GO:0017111|GO:0007049|GO:0000166|GO:0005634|GO:0005524|GO:0003677	NM_022092	Hs.153850
A_32_P206698	0.0091174	2.24015	up	9.64761	10.8112	CKS1B	Homo sapiens CDC28 protein kinase regulatory subunit 1B (CKS1B), transcript variant 1, mRNA [NM_001826]	154950471	chr1	154947230	+	FALSE	hs|1q21.3	1163	NM_001826	CDC28 protein kinase regulatory subunit 1B	chr1:154947230-154950471	GO:0005515|GO:0000084|GO:0007049|GO:0000082|GO:0016301|GO:0008283|GO:0016538|GO:0005654|GO:0000079|GO:0000278|GO:0051301	NM_001826	Hs.374378
A_23_P45751	0.00244475	36.896	down	12.9893	7.7839	CLCA4	Homo sapiens chloride channel accessory 4 (CLCA4), transcript variant 1, mRNA [NM_012128]	87045222	chr1	87045163	+	FALSE	hs|1p22.3	22802	NM_012128	chloride channel accessory 4	chr1:87045163-87045222	GO:0006821|GO:0016324|GO:0005886|GO:0005887|GO:0006810|GO:0005576|GO:0005254	NM_012128	Hs.567422
A_33_P3255404	0.000232	3.01775	down	10.0544	8.46096	CLDN11	Homo sapiens claudin 11 (CLDN11), transcript variant 1, mRNA [NM_005602]	170151883	chr3	170151824	+	FALSE	hs|3q26.2	5010	NM_005602	claudin 11	chr3:170151824-170151883	GO:0030054|GO:0016338|GO:0005886|GO:0005198|GO:0016021|GO:0007283|GO:0005923|GO:0008366|GO:0007155|GO:0042802	NM_005602	Hs.31595
A_23_P360924	0.00309817	11.5159	down	8.04743	4.52187	CLDN17	Homo sapiens claudin 17 (CLDN17), mRNA [NM_012131]	31538328	chr21	31538269	-	FALSE	hs|21q22.11	26285	NM_012131	claudin 17	chr21:31538328-31538269	GO:0030054|GO:0016338|GO:0005794|GO:0070830|GO:0005886|GO:0005198|GO:0034329|GO:0016021|GO:0005923|GO:0045216|GO:0042802	NM_012131	Hs.258589
A_23_P164284	0.00262931	2.66341	down	12.7207	11.3074	CLDN7	Homo sapiens claudin 7 (CLDN7), transcript variant 1, mRNA [NM_001307]	7163986	chr17	7163822	-	FALSE	hs|17p13.1	1366	NM_001307	claudin 7	chr17:7163986-7163822	GO:0005515|GO:0030054|GO:0016338|GO:0005886|GO:0005198|GO:0016021|GO:0005923|GO:0016328|GO:0042802	NM_001307	Hs.513915
A_33_P3229032	9.17e-05	2.02685	up	11.0721	12.0913	CLEC11A	Homo sapiens C-type lectin domain family 11, member A (CLEC11A), mRNA [NM_002975]	51228970	chr19	51228911	+	FALSE	hs|19q13.33	6320	NM_002975	C-type lectin domain family 11, member A	chr19:51228911-51228970	GO:0008284|GO:0005737|GO:0005488|GO:0005529|GO:0005576|GO:0008083	NM_002975	Hs.512680
A_23_P69497	0.00301621	3.3112	down	12.8225	11.0952	CLEC3B	Homo sapiens C-type lectin domain family 3, member B (CLEC3B), mRNA [NM_003278]	45077561	chr3	45077502	+	FALSE	hs|3p21.31	7123	NM_003278	C-type lectin domain family 3, member B	chr3:45077502-45077561	GO:0005515|GO:0001501|GO:0005529|GO:0005576|GO:0005615	NM_003278	Hs.476092
A_33_P3336686	0.000769	11.6154	down	14.4675	10.9295	CLIC3	Homo sapiens chloride intracellular channel 3 (CLIC3), mRNA [NM_004669]	139889119	chr9	139889060	-	FALSE	hs|9q34.3	9022	NM_004669	chloride intracellular channel 3	chr9:139889119-139889060	GO:0005515|GO:0007165|GO:0006821|GO:0005737|GO:0005244|GO:0016020|GO:0005247|GO:0034707|GO:0005634|GO:0016021|GO:0005254|GO:0006811	NM_004669	Hs.64746
A_23_P259189	0.0028372	2.06044	up	10.8451	11.8881	CLIC4	Homo sapiens chloride intracellular channel 4 (CLIC4), nuclear gene encoding mitochondrial protein, mRNA [NM_013943]	25167308	chr1	25166518	+	FALSE	hs|1p36.11	25932	NM_013943	chloride intracellular channel 4	chr1:25166518-25167308	GO:0005515|GO:0006821|GO:0048471|GO:0005886|GO:0035088|GO:0005634|GO:0015629|GO:0005254|GO:0016363|GO:0030154|GO:0005829|GO:0005739|GO:0005622|GO:0005737|GO:0005911|GO:0015630|GO:0071277|GO:0030659|GO:0006811|GO:0005813|GO:0030336|GO:0005244|GO:0009986|GO:0005247|GO:0034707|GO:0045177|GO:0030496|GO:0005625|GO:0031410|GO:0005902|GO:0051493|GO:0030216|GO:0016021	NM_013943	Hs.440544
A_33_P3236077	0.00401006	2.88973	down	4.65999	3.12905	CLRN2	Homo sapiens clarin 2 (CLRN2), mRNA [NM_001079827]	17528714	chr4	17528655	+	FALSE	hs|4p15.32	645104	NM_001079827	clarin 2	chr4:17528655-17528714	GO:0016020|GO:0016021	NM_001079827	Hs.631526
A_33_P3328666	0.00665642	2.17977	down	10.3668	9.24261	CLTB	Homo sapiens clathrin, light chain B (CLTB), transcript variant 2, mRNA [NM_007097]	175819515	chr5	175819456	-	FALSE	hs|5q35.2	1212	NM_007097	clathrin, light chain B	chr5:175819515-175819456	GO:0005515|GO:0042277|GO:0030132|GO:0016020|GO:0005198|GO:0030130|GO:0031410|GO:0016192|GO:0006886|GO:0030659|GO:0030118	NM_007097	Hs.484241
A_32_P73045	0.00322694	2.14785	down	11.4323	10.3294	CMAS	Homo sapiens cytidine monophosphate N-acetylneuraminic acid synthetase (CMAS), mRNA [NM_018686]	22215230	chr12	22214343	+	FALSE	hs|12p12.1	55907	NM_018686	cytidine monophosphate N-acetylneuraminic acid synthetase	chr12:22214343-22215230	GO:0016779|GO:0008781|GO:0005634|GO:0009103|GO:0016740	NM_018686	Hs.311346
A_33_P3401826	0.00619752	3.73353	up	8.78033	10.6809	CMPK2	Homo sapiens cytidine monophosphate (UMP-CMP) kinase 2, mitochondrial (CMPK2), nuclear gene encoding mitochondrial protein, mRNA [NM_207315]	6988526	chr2	6988467	-	FALSE	hs|2p25.2	129607	NM_207315	cytidine monophosphate (UMP-CMP) kinase 2, mitochondrial	chr2:6988526-6988467	GO:0005739|GO:0000166|GO:0016301|GO:0004127|GO:0033862|GO:0006221|GO:0006233|GO:0005524|GO:0016740|GO:0004798	NM_207315	Hs.7155
A_33_P3340342	0.0014274	2.17021	up	9.72618	10.844	CMTM3	Homo sapiens CKLF-like MARVEL transmembrane domain containing 3 (CMTM3), transcript variant 1, mRNA [NM_144601]	66647257	chr16	66647198	+	FALSE	hs|16q21	123920	NM_144601	CKLF-like MARVEL transmembrane domain containing 3	chr16:66647198-66647257	GO:0016020|GO:0006935|GO:0016021|GO:0005615|GO:0005125	NM_144601	Hs.298198
A_23_P92536	0.00191921	4.18444	down	5.85448	3.78945	CNGA1	Homo sapiens cyclic nucleotide gated channel alpha 1 (CNGA1), transcript variant 2, mRNA [NM_000087]	47938655	chr4	47938596	-	FALSE	hs|4p12	1259	NM_000087	cyclic nucleotide gated channel alpha 1	chr4:47938655-47938596	GO:0030553|GO:0016020|GO:0000166|GO:0005887|GO:0006810|GO:0016021|GO:0055085|GO:0007601|GO:0005216|GO:0050896|GO:0006811	NM_000087	Hs.1323
A_23_P134085	0.00826444	2.41119	down	11.5044	10.2347	CNKSR3	Homo sapiens CNKSR family member 3 (CNKSR3), mRNA [NM_173515]	154726608	chr6	154726549	-	FALSE	hs|6q25.2	154043	NM_173515	CNKSR family member 3	chr6:154726608-154726549	GO:0005737|GO:0016020|GO:0033137|GO:0010765|GO:0070373|GO:0009966	NM_173515	Hs.16064
A_33_P3238215	0.00137578	2.50103	down	12.9753	11.6528	COBLL1	Homo sapiens COBL-like 1 (COBLL1), mRNA [NM_014900]	165541428	chr2	165541369	-	FALSE	hs|2q24.3	22837	NM_014900	COBL-like 1	chr2:165541428-165541369	NA	NM_014900	Hs.470457
A_23_P214144	1.93e-06	21.6226	up	7.31269	11.7472	COL10A1	Homo sapiens collagen, type X, alpha 1 (COL10A1), mRNA [NM_000493]	116441120	chr6	116441061	-	FALSE	hs|6q22.1	1300	NM_000493	collagen, type X, alpha 1	chr6:116441120-116441061	GO:0005581|GO:0001501|GO:0005576|GO:0005938|GO:0046872	NM_000493	Hs.520339
A_33_P3231953	0.000171	3.15255	up	9.09468	10.7512	COL12A1	Homo sapiens collagen, type XII, alpha 1 (COL12A1), transcript variant long, mRNA [NM_004370]	75822987	chr6	75822928	-	FALSE	hs|6q13	1303	NM_004370	collagen, type XII, alpha 1	chr6:75822987-75822928	GO:0031012|GO:0005581|GO:0001501|GO:0030020|GO:0005198|GO:0030199|GO:0005595|GO:0005576|GO:0007155|GO:0005615	NM_004370	Hs.101302
A_33_P3304668	8.42e-06	15.0536	up	12.5944	16.5065	COL1A1	Homo sapiens collagen, type I, alpha 1 (COL1A1), mRNA [NM_000088]	48261568	chr17	48261509	-	FALSE	hs|17q21.33	1277	NM_000088	collagen, type I, alpha 1	chr17:48261568-48261509	GO:0005515|GO:0042542|GO:0034504|GO:0005581|GO:0034505|GO:0005886|GO:0071300|GO:0007605|GO:0090263|GO:0048706|GO:0010718|GO:0010812|GO:0043434|GO:0050900|GO:0015031|GO:0051591|GO:0005615|GO:0042802|GO:0005584|GO:0070208|GO:0005737|GO:0010035|GO:0007411|GO:0060351|GO:0030199|GO:0030335|GO:0001568|GO:0048407|GO:0007584|GO:0031960|GO:0030168|GO:0005576|GO:0001649|GO:0009612|GO:0031012|GO:0001958|GO:…	NM_000088	Hs.172928
A_24_P277934	1.07e-05	5.68166	up	13.4999	16.0062	COL1A2	Homo sapiens collagen, type I, alpha 2 (COL1A2), mRNA [NM_000089]	94058702	chr7	94058643	+	FALSE	hs|7q21.3	1278	NM_000089	collagen, type I, alpha 2	chr7:94058643-94058702	GO:0005515|GO:0005581|GO:0005886|GO:0046332|GO:0007266|GO:0050900|GO:0005615|GO:0005584|GO:0042802|GO:0070208|GO:0007411|GO:0030199|GO:0042476|GO:0007179|GO:0030674|GO:0001568|GO:0048407|GO:0030168|GO:0005576|GO:0031012|GO:0001501|GO:0007596|GO:0008217|GO:0043589|GO:0005201	NM_000089	Hs.489142
A_33_P3395952	0.00256158	2.05299	down	7.80721	6.76948	COL20A1	Homo sapiens collagen, type XX, alpha 1 (COL20A1), mRNA [NM_020882]	61961010	chr20	61960951	+	FALSE	hs|20q13.33	57642	NM_020882	collagen, type XX, alpha 1	chr20:61960951-61961010	GO:0005581|GO:0005198|GO:0005576|GO:0007155|GO:0005615	NM_020882	Hs.271285
A_23_P74701	0.00839097	3.25087	up	6.0587	7.75953	COL24A1	Homo sapiens collagen, type XXIV, alpha 1 (COL24A1), mRNA [NM_152890]	86195414	chr1	86195355	-	FALSE	hs|1p22.3	255631	NM_152890	collagen, type XXIV, alpha 1	chr1:86195414-86195355	GO:0005581|GO:0005576|GO:0007155|GO:0005201	NM_152890	Hs.659516
A_24_P935491	0.000313	5.60367	up	9.87759	12.364	COL3A1	Homo sapiens collagen, type III, alpha 1 (COL3A1), mRNA [NM_000090]	189876819	chr2	189876760	+	FALSE	hs|2q32.2	1281	NM_000090	collagen, type III, alpha 1	chr2:189876760-189876819	GO:0005515|GO:0005581|GO:0005586|GO:0005615|GO:0007507|GO:0007411|GO:0030199|GO:0007179|GO:0043206|GO:0034097|GO:0009314|GO:0048407|GO:0030168|GO:0005576|GO:0031012|GO:0001501|GO:0005178|GO:0018149|GO:0007160|GO:0050777|GO:0007229|GO:0042060|GO:0043588|GO:0032964|GO:0005201	NM_000090	Hs.443625
A_23_P65240	0.000228	3.98499	up	10.2308	12.2253	COL4A1	Homo sapiens collagen, type IV, alpha 1 (COL4A1), mRNA [NM_001845]	110802406	chr13	110802347	-	FALSE	hs|13q34	1282	NM_001845	collagen, type IV, alpha 1	chr13:110802406-110802347	GO:0005515|GO:0005581|GO:0048407|GO:0007528|GO:0007411|GO:0030855|GO:0005587|GO:0005576|GO:0001525|GO:0005201	NM_001845	Hs.17441
A_23_P205031	0.000219	3.11955	up	13.1501	14.7914	COL4A2	Homo sapiens collagen, type IV, alpha 2 (COL4A2), mRNA [NM_001846]	111165320	chr13	111165261	+	FALSE	hs|13q34	1284	NM_001846	collagen, type IV, alpha 2	chr13:111165261-111165320	GO:0031012|GO:0005515|GO:0005581|GO:0030198|GO:0007411|GO:0016525|GO:0005587|GO:0005576|GO:0005201	NM_001846	Hs.508716
A_23_P45365	0.00877468	2.00277	up	10.1954	11.1974	COL4A5	Homo sapiens collagen, type IV, alpha 5 (COL4A5), transcript variant 2, mRNA [NM_033380]	107940639	chrX	107940580	+	FALSE	hs|Xq22.3	1287	NM_033380	collagen, type IV, alpha 5	chrX:107940580-107940639	GO:0005515|GO:0005581|GO:0007411|GO:0005587|GO:0005576|GO:0005201	NM_033380	Hs.369089
A_33_P3629678	9.19e-06	4.0852	up	11.1607	13.1911	COL5A1	Homo sapiens collagen, type V, alpha 1 (COL5A1), mRNA [NM_000093]	137736386	chr9	137736327	+	FALSE	hs|9q34.3	1289	NM_000093	collagen, type V, alpha 1	chr9:137736327-137736386	GO:0005581|GO:0035313|GO:0001568|GO:0048407|GO:0043394|GO:0048592|GO:0005576|GO:0005588|GO:0005604|GO:0031012|GO:0003007|GO:0005178|GO:0016477|GO:0007411|GO:0051128|GO:0030199|GO:0045112|GO:0043588|GO:0043206|GO:0032964|GO:0007155|GO:0008201|GO:0005201	NM_000093	Hs.210283
A_23_P33196	4.03e-05	5.0703	up	10.7662	13.1083	COL5A2	Homo sapiens collagen, type V, alpha 2 (COL5A2), mRNA [NM_000393]	189897488	chr2	189897429	-	FALSE	hs|2q32.2	1290	NM_000393	collagen, type V, alpha 2	chr2:189897488-189897429	GO:0031012|GO:0003674|GO:0005581|GO:0007411|GO:0030199|GO:0048592|GO:0043588|GO:0005576|GO:0005588|GO:0005201	NM_000393	Hs.445827
A_32_P32254	0.00280488	2.1455	up	14.0732	15.1745	COL6A1	Homo sapiens collagen, type VI, alpha 1 (COL6A1), mRNA [NM_001848]	47424895	chr21	47424836	+	FALSE	hs|21q22.3	1291	NM_001848	collagen, type VI, alpha 1	chr21:47424836-47424895	GO:0070208|GO:0042383|GO:0031012|GO:0043234|GO:0005581|GO:0048407|GO:0007411|GO:0005589|GO:0005576|GO:0007155	NM_001848	Hs.474053
A_33_P3210488	0.00355969	3.02859	up	9.49724	11.0959	COL6A3	Homo sapiens collagen, type VI, alpha 3 (COL6A3), transcript variant 1, mRNA [NM_004369]	238234263	chr2	238234204	-	FALSE	hs|2q37.3	1293	NM_004369	collagen, type VI, alpha 3	chr2:238234263-238234204	GO:0031012|GO:0005581|GO:0007517|GO:0007411|GO:0004867|GO:0005589|GO:0005576|GO:0030414|GO:0007155|GO:0005615|GO:0009749	NM_004369	Hs.233240
A_32_P224525	0.0023798	3.00981	down	7.44473	5.85505	COL6A6	Homo sapiens collagen, type VI, alpha 6 (COL6A6), mRNA [NM_001102608]	130395824	chr3	130395765	+	FALSE	hs|3q22.1	131873	NM_001102608	collagen, type VI, alpha 6	chr3:130395765-130395824	GO:0031012|GO:0005581|GO:0007411|GO:0005576|GO:0007155	NM_001102608	Hs.591282
A_23_P69030	0.000391	3.2869	up	10.5617	12.2784	COL8A1	Homo sapiens collagen, type VIII, alpha 1 (COL8A1), transcript variant 1, mRNA [NM_001850]	99514824	chr3	99514765	+	FALSE	hs|3q12.1	1295	NM_001850	collagen, type VIII, alpha 1	chr3:99514765-99514824	GO:0031012|GO:0005581|GO:0005591|GO:0010811|GO:0005576|GO:0048593|GO:0001525|GO:0007155|GO:0050673|GO:0005604	NM_001850	Hs.654548
A_33_P3257222	0.00059	2.43128	down	12.7842	11.5025	COMTD1	Homo sapiens catechol-O-methyltransferase domain containing 1 (COMTD1), mRNA [NM_144589]	76993805	chr10	76993746	-	FALSE	hs|10q22.2	118881	NM_144589	catechol-O-methyltransferase domain containing 1	chr10:76993805-76993746	GO:0005739|GO:0016020|GO:0016021|GO:0008171|GO:0016740	NM_144589	Hs.355333
A_23_P101093	0.00631618	2.02768	up	8.98819	10.008	COPZ2	Homo sapiens coatomer protein complex, subunit zeta 2 (COPZ2), mRNA [NM_016429]	46105838	chr17	46103783	-	FALSE	hs|17q21.32	51226	NM_016429	coatomer protein complex, subunit zeta 2	chr17:46105838-46103783	GO:0005801|GO:0030126|GO:0005737|GO:0005794|GO:0016020|GO:0000139|GO:0031410|GO:0016192|GO:0006886	NM_016429	Hs.408434
A_23_P46812	0.000843	3.39251	down	7.83781	6.07546	CPEB3	Homo sapiens cytoplasmic polyadenylation element binding protein 3 (CPEB3), transcript variant 1, mRNA [NM_014912]	93809440	chr10	93809381	-	FALSE	hs|10q23.32	22849	NM_014912	cytoplasmic polyadenylation element binding protein 3	chr10:93809440-93809381	GO:0000166|GO:0003723	NM_014912	Hs.131683
A_23_P117851	0.000575	5.2369	down	7.42287	5.03416	CPLX3	Homo sapiens complexin 3 (CPLX3), mRNA [NM_001030005]	75123555	chr15	75123496	+	FALSE	hs|15q24.1	594855	NM_001030005	complexin 3	chr15:75123496-75123555	GO:0019905|GO:0030054|GO:0005886|GO:0005326|GO:0046928|GO:0045202|GO:0030073|GO:0016079|GO:0005829	NM_001030005	Hs.187694
A_24_P64126	0.00175023	2.06136	down	9.8635	8.8199	CPNE3	Homo sapiens copine III (CPNE3), mRNA [NM_003909]	87573001	chr8	87572942	+	FALSE	hs|8q21.3	8895	NM_003909	copine III	chr8:87572942-87573001	GO:0006629|GO:0005544|GO:0005215|GO:0005737|GO:0004674|GO:0016192|GO:0005829	NM_003909	Hs.191219
A_23_P115064	0.00227072	9.69277	down	13.8769	10.5999	CRABP2	Homo sapiens cellular retinoic acid binding protein 2 (CRABP2), transcript variant 1, mRNA [NM_001878]	156669638	chr1	156669579	-	FALSE	hs|1q23.1	1382	NM_001878	cellular retinoic acid binding protein 2	chr1:156669638-156669579	GO:0005215|GO:0006355|GO:0005730|GO:0016918|GO:0005634|GO:0019841|GO:0008289|GO:0007165|GO:0005737|GO:0008544|GO:0042573|GO:0001972|GO:0005501|GO:0035115	NM_001878	Hs.405662
A_32_P173662	0.000741	32.0516	down	9.86022	4.8579	CRISP2	Homo sapiens cysteine-rich secretory protein 2 (CRISP2), transcript variant 1, mRNA [NM_003296]	49665601	chr6	49663607	-	FALSE	hs|6p12.3	7180	NM_003296	cysteine-rich secretory protein 2	chr6:49665601-49663607	GO:0005576|GO:0005615	NM_003296	Hs.2042
A_23_P419760	0.00104166	32.7033	down	8.43899	3.40762	CRISP3	Homo sapiens cysteine-rich secretory protein 3 (CRISP3), transcript variant 1, mRNA [NM_006061]	49696237	chr6	49696178	-	FALSE	hs|6p12.3	10321	NM_006061	cysteine-rich secretory protein 3	chr6:49696237-49696178	GO:0003674|GO:0045087|GO:0042581|GO:0005578|GO:0006952|GO:0005576	NM_006061	Hs.404466
A_23_P115202	0.00700615	80.5478	down	17.6052	11.2735	CRNN	Homo sapiens cornulin (CRNN), mRNA [NM_016190]	152381792	chr1	152381733	-	FALSE	hs|1q21.3	49860	NM_016190	cornulin	chr1:152381792-152381733	GO:0016337|GO:0005737|GO:0016020|GO:0009408|GO:0005509	NM_016190	Hs.242057
A_23_P168669	0.00273879	2.21548	down	8.15048	7.00286	CROT	Homo sapiens carnitine O-octanoyltransferase (CROT), transcript variant 2, mRNA [NM_021151]	87028057	chr7	87027998	+	FALSE	hs|7q21.12	54677	NM_021151	carnitine O-octanoyltransferase	chr7:87027998-87028057	GO:0005782|GO:0006810|GO:0006631|GO:0033540|GO:0008458|GO:0006091|GO:0044255|GO:0016740|GO:0008415|GO:0005777	NM_021151	Hs.125039
A_23_P162746	0.00170969	2.33107	down	11.3976	10.1766	CRYL1	Homo sapiens crystallin, lambda 1 (CRYL1), mRNA [NM_015974]	20977891	chr13	20977832	-	FALSE	hs|13q12.11	51084	NM_015974	crystallin, lambda 1	chr13:20977891-20977832	GO:0050662|GO:0050104|GO:0005737|GO:0005488|GO:0016491|GO:0006631|GO:0070403|GO:0003857|GO:0042803|GO:0005829	NM_015974	Hs.370703
A_23_P77731	0.00573822	4.39673	down	10.6451	8.50869	CRYM	Homo sapiens crystallin, mu (CRYM), transcript variant 1, mRNA [NM_001888]	21270022	chr16	21269963	-	FALSE	hs|16p12.2	1428	NM_001888	crystallin, mu	chr16:21270022-21269963	GO:0050661|GO:0005886|GO:0003714|GO:0007605|GO:0042562|GO:0005730|GO:0070327|GO:0005634|GO:0000122|GO:0070324|GO:0042803|GO:0005739|GO:0042403|GO:0005737|GO:0005488	NM_001888	Hs.924
A_23_P112859	0.00403259	10.7735	up	4.38852	7.81794	CST1	Homo sapiens cystatin SN (CST1), mRNA [NM_001898]	23731379	chr20	23731320	-	FALSE	hs|20p11.21	1469	NM_001898	cystatin SN	chr20:23731379-23731320	GO:0004869|GO:0005576|GO:0030414	NM_001898	Hs.123114
A_24_P237175	0.00384582	3.55964	up	6.53636	8.36809	CST2	Homo sapiens cystatin SA (CST2), mRNA [NM_001322]	23807162	chr20	23807103	-	FALSE	hs|20p11.21	1470	NM_001322	cystatin SA	chr20:23807162-23807103	GO:0004869|GO:0005576|GO:0030414	NM_001322	Hs.669305
A_23_P146946	0.00253099	4.41829	down	11.3792	9.23568	CST6	Homo sapiens cystatin E/M (CST6), mRNA [NM_001323]	65780897	chr11	65780838	+	FALSE	hs|11q13.1	1474	NM_001323	cystatin E/M	chr11:65780838-65780897	GO:0004869|GO:0008544|GO:0005576|GO:0030414|GO:0009653|GO:0001533	NM_001323	Hs.139389
A_23_P41114	0.00513651	4.95468	down	17.0899	14.7811	CSTA	Homo sapiens cystatin A (stefin A) (CSTA), mRNA [NM_005213]	122056475	chr3	122056416	+	FALSE	hs|3q21.1	1475	NM_005213	cystatin A (stefin A)	chr3:122056416-122056475	GO:0005622|GO:0005737|GO:0018149|GO:0004869|GO:0030216|GO:0005198|GO:0010466|GO:0005634|GO:0030674|GO:0002020|GO:0001533	NM_005213	Hs.518198
A_23_P154894	0.00112049	4.30282	down	18.0784	15.9732	CSTB	Homo sapiens cystatin B (stefin B) (CSTB), mRNA [NM_000100]	45194115	chr21	45194056	-	FALSE	hs|21q22.3	1476	NM_000100	cystatin B (stefin B)	chr21:45194115-45194056	GO:0010951|GO:0005622|GO:0005515|GO:0008344|GO:0005737|GO:0004869|GO:0004866|GO:0010466|GO:0005730|GO:0042981|GO:0005634|GO:0002020	NM_000100	Hs.695
A_23_P111888	0.000318	16.9286	up	7.20167	11.2831	CTHRC1	Homo sapiens collagen triple helix repeat containing 1 (CTHRC1), mRNA [NM_138455]	104390327	chr8	104390268	+	FALSE	hs|8q22.3	115908	NM_138455	collagen triple helix repeat containing 1	chr8:104390268-104390327	GO:0005581|GO:0016477|GO:0005576	NM_138455	Hs.405614
A_33_P3286293	0.00416046	2.87606	down	10.4336	8.90947	CTNNBIP1	Homo sapiens catenin, beta interacting protein 1 (CTNNBIP1), transcript variant 1, mRNA [NM_020248]	9910778	chr1	9910719	-	FALSE	hs|1p36.22	56998	NM_020248	catenin, beta interacting protein 1	chr1:9910778-9910719	GO:0002528|GO:0005515|GO:0032091|GO:0072201|GO:0001658|GO:0008013|GO:0030178|GO:0048662|GO:0005634|GO:0000122|GO:0009952|GO:0043433|GO:0043392|GO:0005829|GO:0045669|GO:0060633|GO:0005737|GO:0034747|GO:0031333|GO:0045657|GO:0070016	NM_020248	Hs.463759
A_23_P251316	0.00626543	2.61108	down	12.1363	10.7516	CTNND1	Homo sapiens catenin (cadherin-associated protein), delta 1 (CTNND1), transcript variant 3, mRNA [NM_001331]	57586374	chr11	57586315	+	FALSE	hs|11q12.1	1500	NM_001331	catenin (cadherin-associated protein), delta 1	chr11:57586315-57586374	GO:0005515|GO:0060690|GO:0042153|GO:0005886|GO:0005634|GO:0001738|GO:0005829|GO:0005737|GO:0016337|GO:0005913|GO:0005911|GO:0007155|GO:0016055|GO:0090090|GO:0007435|GO:0006355|GO:0045296|GO:0019903|GO:0034329|GO:0019904|GO:0005102|GO:0005624|GO:0030496|GO:0030027|GO:0045216|GO:0030216|GO:0034332	NM_001331	Hs.166011
A_23_P34744	0.0061467	2.1883	up	12.8161	13.9459	CTSK	Homo sapiens cathepsin K (CTSK), mRNA [NM_000396]	150768912	chr1	150768853	-	FALSE	hs|1q21.3	1513	NM_000396	cathepsin K	chr1:150768912-150768853	GO:0005515|GO:0004197|GO:0005737|GO:0001957|GO:0045453|GO:0006508|GO:0008233|GO:0008234|GO:0005764|GO:0005615	NM_000396	Hs.632466
A_23_P94533	0.00093	3.77451	up	10.8033	12.7196	CTSL1	Homo sapiens cathepsin L1 (CTSL1), transcript variant 1, mRNA [NM_001912]	90345385	chr9	90345326	+	FALSE	hs|9q21.33	1514	NM_001912	cathepsin L1	chr9:90345326-90345385	GO:0071888|GO:0005515|GO:0004197|GO:0042393|GO:0006508|GO:0008233|GO:0005634|GO:0005576|GO:0005764	NM_001912	Hs.418123
A_23_P40240	0.000287	2.85297	up	8.32277	9.83523	CTSZ	Homo sapiens cathepsin Z (CTSZ), mRNA [NM_001336]	57570420	chr20	57570361	-	FALSE	hs|20q13.32	1522	NM_001336	cathepsin Z	chr20:57570420-57570361	GO:0004197|GO:0060441|GO:0005783|GO:0006508|GO:0008233|GO:0008234|GO:0005764|GO:0005615	NM_001336	Hs.252549
A_23_P110319	0.00540268	14.8499	down	10.5494	6.65697	CWH43	Homo sapiens cell wall biogenesis 43 C-terminal homolog (S. cerevisiae) (CWH43), mRNA [NM_025087]	49040098	chr4	49034719	+	FALSE	hs|4p11	80157	NM_025087	cell wall biogenesis 43 C-terminal homolog (S. cerevisiae)	chr4:49034719-49040098	GO:0016020|GO:0016021|GO:0006506	NM_025087	Hs.479703
A_33_P3343175	0.00286586	5.77863	up	7.70492	10.2356	CXCL10	Homo sapiens chemokine (C-X-C motif) ligand 10 (CXCL10), mRNA [NM_001565]	76943579	chr4	76943520	-	FALSE	hs|4q21.1	3627	NM_001565	chemokine (C-X-C motif) ligand 10	chr4:76943579-76943520	GO:0008284|GO:0009306|GO:0008603|GO:0008015|GO:0010996|GO:0009409|GO:0007267|GO:0033280|GO:0005615|GO:0034605|GO:0051607|GO:0006955|GO:0006954|GO:0006935|GO:0032496|GO:0010332|GO:0008009|GO:0030335|GO:0005102|GO:0005576|GO:0002690|GO:0007165|GO:0007517|GO:0016525|GO:0007166|GO:0009897	NM_001565	Hs.632586
A_23_P125278	0.00158288	8.15698	up	4.98057	8.0086	CXCL11	Homo sapiens chemokine (C-X-C motif) ligand 11 (CXCL11), mRNA [NM_005409]	76955674	chr4	76955615	-	FALSE	hs|4q21.1	6373	NM_005409	chemokine (C-X-C motif) ligand 11	chr4:76955674-76955615	GO:0008009|GO:0007165|GO:0006955|GO:0006954|GO:0006935|GO:0007267|GO:0005576|GO:0005615	NM_005409	Hs.632592
A_23_P50269	0.00905406	6.60234	down	11.5246	8.80163	CXCL17	Homo sapiens chemokine (C-X-C motif) ligand 17 (CXCL17), mRNA [NM_198477]	42932920	chr19	42932861	-	FALSE	hs|19q13.2	284340	NM_198477	chemokine (C-X-C motif) ligand 17	chr19:42932920-42932861	GO:0006935|GO:0007275|GO:0005576|GO:0001525|GO:0030154	NM_198477	Hs.445586
A_23_P18452	0.00254174	4.53608	up	9.49017	11.6716	CXCL9	Homo sapiens chemokine (C-X-C motif) ligand 9 (CXCL9), mRNA [NM_002416]	76922855	chr4	76922796	-	FALSE	hs|4q21.1	4283	NM_002416	chemokine (C-X-C motif) ligand 9	chr4:76922855-76922796	GO:0008009|GO:0007165|GO:0006968|GO:0006955|GO:0006954|GO:0007186|GO:0006935|GO:0007267|GO:0006952|GO:0005576|GO:0005615|GO:0005125	NM_002416	Hs.77367
A_33_P3214550	8.29e-05	5.46297	down	10.4777	8.028	CXCR2	Homo sapiens chemokine (C-X-C motif) receptor 2 (CXCR2), transcript variant 1, mRNA [NM_001557]	219001934	chr2	219001875	+	FALSE	hs|2q35	3579	NM_001557	chemokine (C-X-C motif) receptor 2	chr2:219001875-219001934	GO:0008284|GO:0005886|GO:0007200|GO:0019959|GO:0042629|GO:0005622|GO:0006954|GO:0006935|GO:0004950|GO:0004872|GO:0004871|GO:0009986|GO:0004930|GO:0030593|GO:0002407|GO:0006915|GO:0004918|GO:0007165|GO:0006968|GO:0016020|GO:0005887|GO:0016494|GO:0016021|GO:0042119|GO:0007166	NM_001557	Hs.846
A_23_P138655	0.00474105	19.0373	up	3.83192	8.08268	CYP26A1	Homo sapiens cytochrome P450, family 26, subfamily A, polypeptide 1 (CYP26A1), transcript variant 2, mRNA [NM_057157]	94837072	chr10	94837013	+	FALSE	hs|10q23.33	1592	NM_057157	cytochrome P450, family 26, subfamily A, polypeptide 1	chr10:94837013-94837072	GO:0005792|GO:0006805|GO:0005783|GO:0009055|GO:0007417|GO:0009952|GO:0046872|GO:0048384|GO:0004497|GO:0019825|GO:0014032|GO:0016020|GO:0048387|GO:0042573|GO:0034653|GO:0001972|GO:0008152|GO:0005789|GO:0008401|GO:0016705|GO:0020037	NM_057157	Hs.150595
A_24_P339514	0.000793	6.7451	down	10.8096	8.05575	CYP2B6	Homo sapiens cytochrome P450, family 2, subfamily B, polypeptide 6 (CYP2B6), mRNA [NM_000767]	41524252	chr19	41524193	+	FALSE	hs|19q13.2	1555	NM_000767	cytochrome P450, family 2, subfamily B, polypeptide 6	chr19:41524193-41524252	GO:0005792|GO:0006805|GO:0070330|GO:0017144|GO:0005783|GO:0009055|GO:0046872|GO:0004497|GO:0016020|GO:0019825|GO:0042738|GO:0005789|GO:0042180|GO:0008202|GO:0055114|GO:0020037	NM_000767	Hs.1360
A_24_P394940	0.0010942	5.18197	down	6.8711	4.4976	CYP2E1	Homo sapiens cytochrome P450, family 2, subfamily E, polypeptide 1 (CYP2E1), mRNA [NM_000773]	135346326	chr10	135346267	+	FALSE	hs|10q26.3	1571	NM_000773	cytochrome P450, family 2, subfamily E, polypeptide 1	chr10:135346267-135346326	GO:0005792|GO:0006805|GO:0017144|GO:0005783|GO:0009055|GO:0016098|GO:0046872|GO:0004497|GO:0019825|GO:0016020|GO:0016709|GO:0005789|GO:0016491|GO:0016712|GO:0019899|GO:0008202|GO:0055114|GO:0046483|GO:0020037	NM_000773	Hs.12907
A_23_P103486	0.000942	9.16809	down	10.9425	7.74588	CYP2J2	Homo sapiens cytochrome P450, family 2, subfamily J, polypeptide 2 (CYP2J2), mRNA [NM_000775]	60359279	chr1	60359220	-	FALSE	hs|1p32.1	1573	NM_000775	cytochrome P450, family 2, subfamily J, polypeptide 2	chr1:60359279-60359220	GO:0005792|GO:0008392|GO:0006805|GO:0070330|GO:0005783|GO:0019373|GO:0008016|GO:0009055|GO:0071614|GO:0046872|GO:0006690|GO:0043651|GO:0016020|GO:0005789|GO:0008405|GO:0008404|GO:0020037	NM_000775	Hs.152096
A_23_P202860	0.00164219	2.02295	down	11.8982	10.8817	CYP2R1	Homo sapiens cytochrome P450, family 2, subfamily R, polypeptide 1 (CYP2R1), mRNA [NM_024514]	14899691	chr11	14899632	-	FALSE	hs|11p15.2	120227	NM_024514	cytochrome P450, family 2, subfamily R, polypeptide 1	chr11:14899691-14899632	GO:0005792|GO:0006805|GO:0030343|GO:0042359|GO:0005783|GO:0010164|GO:0009055|GO:0046872|GO:0004497|GO:0016020|GO:0006766|GO:0047749|GO:0010212|GO:0005789|GO:0042446|GO:0016705|GO:0008202|GO:0020037	NM_024514	Hs.371427
A_23_P8801	0.000622	12.9041	down	11.676	7.98622	CYP3A5	Homo sapiens cytochrome P450, family 3, subfamily A, polypeptide 5 (CYP3A5), transcript variant 1, mRNA [NM_000777]	99245958	chr7	99245899	-	FALSE	hs|7q22.1	1577	NM_000777	cytochrome P450, family 3, subfamily A, polypeptide 5	chr7:99245958-99245899	GO:0005792|GO:0006805|GO:0070330|GO:0005783|GO:0070989|GO:0009055|GO:0046872|GO:0004497|GO:0042737|GO:0016020|GO:0019825|GO:0009822|GO:0005789|GO:0016491|GO:0008202|GO:0020037	NM_000777	Hs.571258
A_33_P3249746	0.000728	6.35052	down	7.64826	4.98139	CYP3A5	Homo sapiens cytochrome P450, family 3, subfamily A, polypeptide 5 (CYP3A5), transcript variant 2, mRNA [NM_001190484]	99277559	chr7	99277500	-	FALSE	hs|7q22.1	1577	NM_001190484	cytochrome P450, family 3, subfamily A, polypeptide 5	chr7:99277559-99277500	GO:0005792|GO:0006805|GO:0070330|GO:0005783|GO:0070989|GO:0009055|GO:0046872|GO:0004497|GO:0042737|GO:0016020|GO:0019825|GO:0009822|GO:0005789|GO:0016491|GO:0008202|GO:0020037	NM_001190484	Hs.571258
A_23_P358917	0.000647	8.81136	down	10.9558	7.81639	CYP3A7	Homo sapiens cytochrome P450, family 3, subfamily A, polypeptide 7 (CYP3A7), mRNA [NM_000765]	99303096	chr7	99303037	-	FALSE	hs|7q22.1	1551	NM_000765	cytochrome P450, family 3, subfamily A, polypeptide 7	chr7:99303096-99303037	GO:0005792|GO:0004497|GO:0006805|GO:0070330|GO:0019825|GO:0016020|GO:0005783|GO:0005789|GO:0009055|GO:0046872|GO:0020037	NM_000765	Hs.111944
A_23_P114713	0.00102461	21.9541	down	10.4007	5.94432	CYP4B1	Homo sapiens cytochrome P450, family 4, subfamily B, polypeptide 1 (CYP4B1), transcript variant 2, mRNA [NM_000779]	47284815	chr1	47284756	+	FALSE	hs|1p33	1580	NM_000779	cytochrome P450, family 4, subfamily B, polypeptide 1	chr1:47284756-47284815	GO:0005792|GO:0004497|GO:0006805|GO:0070330|GO:0019825|GO:0016020|GO:0005783|GO:0005789|GO:0009055|GO:0016705|GO:0046872|GO:0020037	NM_000779	Hs.436317
A_23_P108280	0.00585586	4.73189	down	8.10136	5.85894	CYP4F12	Homo sapiens cytochrome P450, family 4, subfamily F, polypeptide 12 (CYP4F12), mRNA [NM_023944]	15795654	chr19	15794543	+	FALSE	hs|19p13.12	66002	NM_023944	cytochrome P450, family 4, subfamily F, polypeptide 12	chr19:15794543-15795654	GO:0005792|GO:0006805|GO:0070330|GO:0005783|GO:0009055|GO:0046872|GO:0004497|GO:0016020|GO:0019825|GO:0005789|GO:0016021|GO:0016705|GO:0020037	NM_023944	Hs.131459
A_23_P50710	0.00993747	4.27889	down	6.91694	4.8197	CYP4F2	Homo sapiens cytochrome P450, family 4, subfamily F, polypeptide 2 (CYP4F2), mRNA [NM_001082]	16001171	chr19	16000494	-	FALSE	hs|19p13.12	8529	NM_001082	cytochrome P450, family 4, subfamily F, polypeptide 2	chr19:16001171-16000494	GO:0005515|GO:0000038|GO:0005792|GO:0001676|GO:0006805|GO:0005783|GO:0050051|GO:0018685|GO:0009055|GO:0006691|GO:0046872|GO:0004497|GO:0019825|GO:0016020|GO:0005789|GO:0016705|GO:0020037	NM_001082	Hs.558423
A_24_P331150	0.00874236	9.21982	down	7.62928	4.42455	CYP4F22	Homo sapiens cytochrome P450, family 4, subfamily F, polypeptide 22 (CYP4F22), mRNA [NM_173483]	15662779	chr19	15662720	+	FALSE	hs|19p13.12	126410	NM_173483	cytochrome P450, family 4, subfamily F, polypeptide 22	chr19:15662720-15662779	GO:0005792|GO:0004497|GO:0016020|GO:0005783|GO:0005789|GO:0009055|GO:0016705|GO:0046872|GO:0020037	NM_173483	Hs.156452
A_23_P65518	0.00325771	2.98535	up	7.89106	9.46896	DACT1	Homo sapiens dapper, antagonist of beta-catenin, homolog 1 (Xenopus laevis) (DACT1), transcript variant 1, mRNA [NM_016651]	59114772	chr14	59114713	+	FALSE	hs|14q23.1	51339	NM_016651	dapper, antagonist of beta-catenin, homolog 1 (Xenopus laevis)	chr14:59114713-59114772	GO:0005737|GO:0007275|GO:0005634|GO:0016055	NM_016651	Hs.48950
A_23_P255444	0.000386	2.85651	down	10.8886	9.37437	DAPP1	Homo sapiens dual adaptor of phosphotyrosine and 3-phosphoinositides (DAPP1), mRNA [NM_014395]	100790513	chr4	100790454	+	FALSE	hs|4q23	27071	NM_014395	dual adaptor of phosphotyrosine and 3-phosphoinositides	chr4:100790454-100790513	GO:0007165|GO:0005737|GO:0006470|GO:0005543|GO:0005886|GO:0043325|GO:0005547|GO:0035335|GO:0004725	NM_014395	Hs.436271
A_23_P26439	0.000453	2.9286	down	7.95798	6.40777	DBNDD1	Homo sapiens dysbindin (dystrobrevin binding protein 1) domain containing 1 (DBNDD1), transcript variant 1, mRNA [NM_001042610]	90072057	chr16	90071998	-	FALSE	hs|16q24.3	79007	NM_001042610	dysbindin (dystrobrevin binding protein 1) domain containing 1	chr16:90072057-90071998	GO:0005737	NM_001042610	Hs.301394
A_24_P43681	0.00207429	2.00807	down	10.1854	9.17956	DBNL	Homo sapiens drebrin-like (DBNL), transcript variant 1, mRNA [NM_014063]	44100440	chr7	44100381	+	FALSE	hs|7p13	28988	NM_014063	drebrin-like	chr7:44100381-44100440	GO:0005515|GO:0006915|GO:0003779|GO:0007257|GO:0030027|GO:0006921|GO:0042802|GO:0005829|GO:0006897|GO:0005622|GO:0005737|GO:0016601|GO:0005856|GO:0008047|GO:0005938	NM_014063	Hs.436500
A_23_P409462	0.00184399	2.55484	up	7.41583	8.76906	DCBLD1	Homo sapiens discoidin, CUB and LCCL domain containing 1 (DCBLD1), mRNA [NM_173674]	117860457	chr6	117859979	+	FALSE	hs|6q22.1	285761	NM_173674	discoidin, CUB and LCCL domain containing 1	chr6:117859979-117860457	GO:0016020|GO:0016021|GO:0007155	NM_173674	Hs.658304
A_24_P137434	0.00748788	2.13729	up	9.3765	10.4723	DCBLD2	Homo sapiens discoidin, CUB and LCCL domain containing 2 (DCBLD2), mRNA [NM_080927]	98515261	chr3	98515202	-	FALSE	hs|3q12.1	131566	NM_080927	discoidin, CUB and LCCL domain containing 2	chr3:98515261-98515202	GO:0030308|GO:0016020|GO:0009986|GO:0005887|GO:0042060|GO:0007155|GO:0030522	NM_080927	Hs.203691
A_33_P3372886	0.00967454	2.15576	down	12.3311	11.223	DDX51	Homo sapiens DEAD (Asp-Glu-Ala-Asp) box polypeptide 51 (DDX51), mRNA [NM_175066]	132621201	chr12	132621142	-	FALSE	hs|12q24.33	317781	NM_175066	DEAD (Asp-Glu-Ala-Asp) box polypeptide 51	chr12:132621201-132621142	GO:0008026|GO:0016787|GO:0000166|GO:0006364|GO:0003723|GO:0005730|GO:0004386|GO:0005634|GO:0005524	NM_175066	Hs.445168
A_23_P41470	0.00457147	2.78667	up	8.34364	9.82218	DDX60	Homo sapiens DEAD (Asp-Glu-Ala-Asp) box polypeptide 60 (DDX60), mRNA [NM_017631]	169142950	chr4	169142891	-	FALSE	hs|4q32.3	55601	NM_017631	DEAD (Asp-Glu-Ala-Asp) box polypeptide 60	chr4:169142950-169142891	GO:0008026|GO:0016787|GO:0000166|GO:0003723|GO:0004386|GO:0005524	NM_017631	Hs.591710
A_23_P30069	0.00713755	2.38184	up	8.1114	9.36347	DDX60L	Homo sapiens DEAD (Asp-Glu-Ala-Asp) box polypeptide 60-like (DDX60L), mRNA [NM_001012967]	169278384	chr4	169278328	-	FALSE	hs|4q32.3	91351	NM_001012967	DEAD (Asp-Glu-Ala-Asp) box polypeptide 60-like	chr4:169278384-169278328	GO:0008026|GO:0016787|GO:0000166|GO:0003723|GO:0004386|GO:0005524	NM_001012967	Hs.535011
A_24_P6467	0.00818103	3.87075	down	8.28235	6.32974	DENND2C	Homo sapiens DENN/MADD domain containing 2C (DENND2C), mRNA [NM_198459]	115138469	chr1	115137157	-	FALSE	hs|1p13.2	163259	NM_198459	DENN/MADD domain containing 2C	chr1:115138469-115137157	NA	NM_198459	Hs.654928
A_23_P85952	0.00346645	2.13808	down	12.5758	11.4795	DENND2D	Homo sapiens DENN/MADD domain containing 2D (DENND2D), mRNA [NM_024901]	111730006	chr1	111729947	-	FALSE	hs|1p13.3	79961	NM_024901	DENN/MADD domain containing 2D	chr1:111730006-111729947	NA	NM_024901	Hs.557850
A_23_P60166	0.00461789	2.75857	down	9.23846	7.77454	DEPTOR	Homo sapiens DEP domain containing MTOR-interacting protein (DEPTOR), mRNA [NM_022783]	121062641	chr8	121062582	+	FALSE	hs|8q24.12	64798	NM_022783	DEP domain containing MTOR-interacting protein	chr8:121062582-121062641	GO:0035556|GO:0005622|GO:0005515|GO:0045792|GO:0032007|GO:0042981|GO:0006469	NM_022783	Hs.112981
A_33_P3221293	0.00200813	2.90131	up	6.70379	8.2405	DFNA5	Homo sapiens deafness, autosomal dominant 5 (DFNA5), transcript variant 1, mRNA [NM_004403]	24738673	chr7	24738614	-	FALSE	hs|7p15.3	1687	NM_004403	deafness, autosomal dominant 5	chr7:24738673-24738614	GO:0060113|GO:0007605	NM_004403	Hs.520708
A_23_P53198	0.00304975	3.13783	down	8.91903	7.26927	DGAT2	Homo sapiens diacylglycerol O-acyltransferase 2 (DGAT2), mRNA [NM_032564]	75511902	chr11	75511843	+	FALSE	hs|11q13.5	84649	NM_032564	diacylglycerol O-acyltransferase 2	chr11:75511843-75511902	GO:0005792|GO:0008610|GO:0005783|GO:0003846|GO:0005624|GO:0006071|GO:0016020|GO:0005789|GO:0019432|GO:0004144|GO:0016021|GO:0044255|GO:0016740|GO:0008415	NM_032564	Hs.129798
A_23_P48747	0.00127103	4.39476	down	12.2425	10.1067	DHRS1	Homo sapiens dehydrogenase/reductase (SDR family) member 1 (DHRS1), transcript variant 2, mRNA [NM_138452]	24760771	chr14	24760376	-	FALSE	hs|14q12	115817	NM_138452	dehydrogenase/reductase (SDR family) member 1	chr14:24760771-24760376	GO:0005783|GO:0005488|GO:0016491	NM_138452	Hs.348350
A_23_P155848	0.00261818	3.24583	up	3.76146	5.46005	DKK2	Homo sapiens dickkopf homolog 2 (Xenopus laevis) (DKK2), mRNA [NM_014421]	107843709	chr4	107843650	-	FALSE	hs|4q25	27123	NM_014421	dickkopf homolog 2 (Xenopus laevis)	chr4:107843709-107843650	GO:0090263|GO:0007275|GO:0005576|GO:0090090|GO:0005615	NM_014421	Hs.211869
A_23_P413923	0.0029219	4.54899	down	7.65685	5.47131	DMRTA1	Homo sapiens DMRT-like family A1 (DMRTA1), mRNA [NM_022160]	22451937	chr9	22451878	+	FALSE	hs|9p21.3	63951	NM_022160	DMRT-like family A1	chr9:22451878-22451937	GO:0003700|GO:0007548|GO:0005634|GO:0003677|GO:0046872|GO:0030154	NM_022160	Hs.371976
A_23_P250571	0.00122351	2.10101	down	9.48648	8.4154	DMXL1	Homo sapiens Dmx-like 1 (DMXL1), mRNA [NM_005509]	118584532	chr5	118584473	+	FALSE	hs|5q23.1	1657	NM_005509	Dmx-like 1	chr5:118584473-118584532	NA	NM_005509	Hs.181042
A_33_P3418294	0.000824	4.41556	up	4.34902	6.49162	DNAH14	Homo sapiens dynein, axonemal, heavy chain 14 (DNAH14), transcript variant 1, mRNA [NM_001373]	225284932	chr1	225284873	+	FALSE	hs|1q42.12	127602	NM_001373	dynein, axonemal, heavy chain 14	chr1:225284873-225284932	GO:0005929|GO:0005737|GO:0030286|GO:0000166|GO:0005874|GO:0035085|GO:0005856|GO:0003777|GO:0005524|GO:0007018	NM_001373	Hs.133977
A_24_P127691	0.00170276	5.13485	up	4.2492	6.60952	DNAH14	dynein, axonemal, heavy chain 14 [Source:HGNC Symbol;Acc:2945] [ENST00000495456]	225311313	chr1	225311254	+	FALSE	hs|1q42.12	127602	NA	dynein, axonemal, heavy chain 14	chr1:225311254-225311313	GO:0005929|GO:0005737|GO:0030286|GO:0000166|GO:0005874|GO:0035085|GO:0005856|GO:0003777|GO:0005524|GO:0007018	NA	NA
A_33_P3234202	0.00827495	6.84558	down	11.6507	8.87556	DNASE1L3	Homo sapiens deoxyribonuclease I-like 3 (DNASE1L3), mRNA [NM_004944]	58178414	chr3	58178355	-	FALSE	hs|3p14.3	1776	NM_004944	deoxyribonuclease I-like 3	chr3:58178414-58178355	GO:0006308|GO:0004536|GO:0016787|GO:0006309|GO:0005509|GO:0006915|GO:0005634|GO:0006259|GO:0016888|GO:0003677	NM_004944	Hs.476453
A_23_P28953	0.00593643	3.33942	up	7.76082	9.50042	DNMT3B	Homo sapiens DNA (cytosine-5-)-methyltransferase 3 beta (DNMT3B), transcript variant 6, mRNA [NM_175850]	31397123	chr20	31397064	+	FALSE	hs|20q11.21	1789	NM_175850	DNA (cytosine-5-)-methyltransferase 3 beta	chr20:31397064-31397123	GO:0005515|GO:0003886|GO:0006346|GO:0031503|GO:0010424|GO:0005634|GO:0046872|GO:0043231|GO:0045322|GO:0005737|GO:0009008|GO:0010212|GO:0051718|GO:0090116|GO:0003714|GO:0042493|GO:0005730|GO:0003677|GO:0006306|GO:0010628|GO:0005720|GO:0051571|GO:0045666|GO:0051573|GO:0006349|GO:0046498|GO:0045892|GO:0016740|GO:0046499	NM_175850	Hs.713611
A_33_P3259821	0.00969399	3.79573	down	9.7825	7.85813	DOCK9	Homo sapiens dedicator of cytokinesis 9 (DOCK9), transcript variant 4, mRNA [NM_001130050]	99512530	chr13	99512471	-	FALSE	hs|13q32.3	23348	NM_001130050	dedicator of cytokinesis 9	chr13:99512530-99512471	GO:0005515|GO:0005085|GO:0008150|GO:0051020|GO:0016020|GO:0007596|GO:0005575|GO:0005525|GO:0012505|GO:0005829	NM_001130050	Hs.596105
A_23_P162766	0.00126325	2.56519	down	10.6941	9.33504	DOCK9	Homo sapiens dedicator of cytokinesis 9 (DOCK9), transcript variant 1, mRNA [NM_015296]	99446650	chr13	99446591	-	FALSE	hs|13q32.3	23348	NM_015296	dedicator of cytokinesis 9	chr13:99446650-99446591	GO:0005515|GO:0005085|GO:0008150|GO:0051020|GO:0016020|GO:0007596|GO:0005575|GO:0005525|GO:0012505|GO:0005829	NM_015296	Hs.596105
A_33_P3259817	0.00451852	2.33893	down	8.20272	6.97687	DOCK9	Homo sapiens dedicator of cytokinesis 9 (DOCK9), transcript variant 2, mRNA [NM_001130048]	99449429	chr13	99449370	-	FALSE	hs|13q32.3	23348	NM_001130048	dedicator of cytokinesis 9	chr13:99449429-99449370	GO:0005515|GO:0005085|GO:0008150|GO:0051020|GO:0016020|GO:0007596|GO:0005575|GO:0005525|GO:0012505|GO:0005829	NM_001130048	Hs.596105
A_23_P253586	0.00232081	3.57545	down	8.62747	6.78935	DOPEY2	Homo sapiens dopey family member 2 (DOPEY2), mRNA [NM_005128]	37665639	chr21	37664494	+	FALSE	hs|21q22.12	9980	NM_005128	dopey family member 2	chr21:37664494-37665639	GO:0003674|GO:0000139|GO:0007275|GO:0015031|GO:0007029|GO:0006895	NM_005128	Hs.204575
A_23_P122508	0.0051784	21.2808	down	9.3495	4.93802	DPCR1	Homo sapiens diffuse panbronchiolitis critical region 1 (DPCR1), mRNA [NM_080870]	30921341	chr6	30921282	+	FALSE	hs|6p21.33	135656	NM_080870	diffuse panbronchiolitis critical region 1	chr6:30921282-30921341	GO:0016020|GO:0016021	NM_080870	Hs.631993
A_23_P200741	0.00674298	3.72591	down	11.6657	9.76813	DPT	Homo sapiens dermatopontin (DPT), mRNA [NM_001937]	168664807	chr1	168664748	-	FALSE	hs|1q24.2	1805	NM_001937	dermatopontin	chr1:168664807-168664748	GO:0031012|GO:0008285|GO:0030199|GO:0005578|GO:0005576|GO:0007155|GO:0005615	NM_001937	Hs.80552
A_23_P99163	0.00476765	2.04399	up	9.7243	10.7557	DRAM1	Homo sapiens DNA-damage regulated autophagy modulator 1 (DRAM1), mRNA [NM_018370]	102317171	chr12	102317112	+	FALSE	hs|12q23.2	55332	NM_018370	DNA-damage regulated autophagy modulator 1	chr12:102317112-102317171	GO:0016020|GO:0006914|GO:0006915|GO:0016021|GO:0005765	NM_018370	Hs.730859
A_23_P10385	0.00333696	3.07898	up	7.98973	9.61218	DTL	Homo sapiens denticleless homolog (Drosophila) (DTL), mRNA [NM_016448]	212277911	chr1	212277852	+	FALSE	hs|1q32.3	51514	NM_016448	denticleless homolog (Drosophila)	chr1:212277852-212277911	GO:0000209|GO:0005515|GO:0006511|GO:0031965|GO:0004842|GO:0005813|GO:0006513|GO:0031572|GO:0005634|GO:0019985|GO:0006974|GO:0006260|GO:0005737|GO:0016020|GO:0051726|GO:0031465|GO:0031464|GO:0005856|GO:0009411	NM_016448	Hs.656473
A_33_P3502640	0.00247971	2.6211	down	10.3233	8.93312	DTX2	Homo sapiens deltex homolog 2 (Drosophila) (DTX2), transcript variant 1, mRNA [NM_020892]	76134839	chr7	76134780	+	FALSE	hs|7q11.23	113878	NM_020892	deltex homolog 2 (Drosophila)	chr7:76134780-76134839	GO:0005515|GO:0005737|GO:0007219|GO:0008270|GO:0005634|GO:0046872	NM_020892	Hs.187058
A_24_P941912	0.00358451	2.1428	up	8.99663	10.0961	DTX3L	Homo sapiens deltex 3-like (Drosophila) (DTX3L), mRNA [NM_138287]	122293098	chr3	122293039	+	FALSE	hs|3q21.1	151636	NM_138287	deltex 3-like (Drosophila)	chr3:122293039-122293098	GO:0005515|GO:0042393|GO:0005737|GO:0004842|GO:0016874|GO:0008270|GO:0005634|GO:0010390|GO:0046872|GO:0006974|GO:0016568	NM_138287	Hs.518201
A_23_P54291	0.00904619	3.86717	down	12.2408	10.2895	DUOX1	Homo sapiens dual oxidase 1 (DUOX1), transcript variant 1, mRNA [NM_017434]	45457688	chr15	45457629	+	FALSE	hs|15q21.1	53905	NM_017434	dual oxidase 1	chr15:45457629-45457688	GO:0050661|GO:0042554|GO:0042335|GO:0005886|GO:0050660|GO:0005509|GO:0019221|GO:0009055|GO:0050665|GO:0051591|GO:0016324|GO:0004601|GO:0016491|GO:0042446|GO:0016174|GO:0016021|GO:0042744|GO:0006979|GO:0055114|GO:0020037	NM_017434	Hs.272813
A_24_P182494	0.00677601	2.11303	up	7.01198	8.09129	DUSP10	Homo sapiens dual specificity phosphatase 10 (DUSP10), transcript variant 1, mRNA [NM_007207]	221875832	chr1	221875773	-	FALSE	hs|1q41	11221	NM_007207	dual specificity phosphatase 10	chr1:221875832-221875773	GO:0005794|GO:0010033|GO:0005730|GO:0006950|GO:0007254|GO:0005634|GO:0060266|GO:0032873|GO:0000188|GO:0002819|GO:0005737|GO:0046329|GO:0006470|GO:0016787|GO:0045088|GO:0032496|GO:0004721|GO:0043508|GO:0017017|GO:0004725	NM_007207	Hs.497822
A_23_P7896	0.00655437	2.28608	down	7.99886	6.80599	DUSP22	Homo sapiens dual specificity phosphatase 22 (DUSP22), mRNA [NM_020185]	345896	chr6	335147	+	FALSE	hs|6p25.3	56940	NM_020185	dual specificity phosphatase 22	chr6:335147-345896	GO:0008283|GO:0046330|GO:0006915|GO:0005634|GO:0007275|GO:0000188|GO:0005737|GO:0006470|GO:0016787|GO:0042127|GO:0007179|GO:0008138|GO:0004725	NM_020185	Hs.29106
A_23_P139704	0.000726	2.18873	up	12.0493	13.1794	DUSP6	Homo sapiens dual specificity phosphatase 6 (DUSP6), transcript variant 1, mRNA [NM_001946]	89742203	chr12	89742144	-	FALSE	hs|12q21.33	1848	NM_001946	dual specificity phosphatase 6	chr12:89742203-89742144	GO:0014070|GO:0034142|GO:0042663|GO:0060420|GO:0051409|GO:0009953|GO:0051403|GO:0030154|GO:0035335|GO:0005829|GO:0000188|GO:0002756|GO:0005737|GO:0002755|GO:0070373|GO:0034138|GO:0004725|GO:0017017|GO:0048011|GO:0034130|GO:0043065|GO:0034134|GO:0042493|GO:0070848|GO:0002224|GO:0008063|GO:0016787|GO:0040036|GO:0045087|GO:0001933|GO:0005654	NM_001946	Hs.298654
A_33_P3308586	0.00973801	4.85339	down	7.32562	5.04662	DUXA	Homo sapiens double homeobox A (DUXA), mRNA [NM_001012729]	57663153	chr19	57663094	-	FALSE	hs|19q13.43	503835	NM_001012729	double homeobox A	chr19:57663153-57663094	GO:0043565|GO:0003700|GO:0005634	NM_001012729	Hs.585857
A_24_P345209	0.00393299	2.3207	up	7.10487	8.31943	DYRK3	Homo sapiens dual-specificity tyrosine-(Y)-phosphorylation regulated kinase 3 (DYRK3), transcript variant 2, mRNA [NM_001004023]	206822280	chr1	206822221	+	FALSE	hs|1q32.1	8444	NM_001004023	dual-specificity tyrosine-(Y)-phosphorylation regulated kinase 3	chr1:206822221-206822280	GO:0005515|GO:0004672|GO:0000287|GO:0000166|GO:0004674|GO:0030218|GO:0006468|GO:0005634|GO:0004713|GO:0005524	NM_001004023	Hs.164267
A_23_P384635	0.00963601	2.75861	up	7.144	8.60794	DZIP1L	Homo sapiens DAZ interacting protein 1-like (DZIP1L), transcript variant 1, mRNA [NM_173543]	137780951	chr3	137780892	-	FALSE	hs|3q22.3	199221	NM_173543	DAZ interacting protein 1-like	chr3:137780951-137780892	GO:0005622|GO:0008270|GO:0046872	NM_173543	Hs.351403
A_32_P210202	0.000948	3.37615	up	8.86701	10.6224	E2F7	Homo sapiens E2F transcription factor 7 (E2F7), mRNA [NM_203394]	77415579	chr12	77415520	-	FALSE	hs|12q21.2	144455	NM_203394	E2F transcription factor 7	chr12:77415579-77415520	GO:0005515|GO:0005667|GO:0007049|GO:0008285|GO:0003700|GO:0005634|GO:0003677|GO:0042802	NM_203394	Hs.416375
A_23_P200203	0.00371201	2.13846	down	14.9211	13.8245	ECHDC2	Homo sapiens enoyl CoA hydratase domain containing 2 (ECHDC2), transcript variant 2, mRNA [NM_018281]	53361964	chr1	53361905	-	FALSE	hs|1p32.3	55268	NM_018281	enoyl CoA hydratase domain containing 2	chr1:53361964-53361905	GO:0006629|GO:0005739|GO:0006631|GO:0016829	NM_018281	Hs.476319
A_24_P343621	0.000214	10.5765	down	12.2857	8.88294	ECHDC3	Homo sapiens enoyl CoA hydratase domain containing 3 (ECHDC3), nuclear gene encoding mitochondrial protein, mRNA [NM_024693]	11805266	chr10	11797592	+	FALSE	hs|10p14	79746	NM_024693	enoyl CoA hydratase domain containing 3	chr10:11797592-11805266	GO:0005739|GO:0003824	NM_024693	Hs.22242
A_23_P160559	0.00110916	9.54014	down	14.4122	11.1582	ECM1	Homo sapiens extracellular matrix protein 1 (ECM1), transcript variant 1, mRNA [NM_004425]	150485856	chr1	150485797	+	FALSE	hs|1q21.3	1893	NM_004425	extracellular matrix protein 1	chr1:150485797-150485856	GO:0005515|GO:0010466|GO:0005578|GO:0005576|GO:0002020|GO:0008022|GO:0030502|GO:0031214|GO:0045766|GO:0007165|GO:0001503|GO:0001938|GO:0043236|GO:0004871|GO:0043123	NM_004425	Hs.81071
A_23_P34045	0.000755	4.06489	down	8.71165	6.68843	EDA	Homo sapiens ectodysplasin A (EDA), transcript variant 1, mRNA [NM_001399]	69259115	chrX	69259056	+	FALSE	hs|Xq13.1	1896	NM_001399	ectodysplasin A	chrX:69259056-69259115	GO:0005515|GO:0010467|GO:0042346|GO:0005581|GO:0005886|GO:0090263|GO:0030154|GO:0006955|GO:0051092|GO:0042475|GO:0060662|GO:0005856|GO:0043123|GO:0005164|GO:0005102|GO:0005624|GO:0045177|GO:0060789|GO:0005576|GO:0007275|GO:0007398|GO:0007165|GO:0061153|GO:0007160|GO:0005887|GO:0005789|GO:0043473|GO:0043588|GO:0016021	NM_001399	Hs.105407
A_32_P126698	0.00907911	2.13662	down	4.17391	3.07857	EFCAB11	EF-hand calcium binding domain 11 [Source:HGNC Symbol;Acc:20357] [ENST00000316738]	90262091	chr14	90262032	-	FALSE	hs|14q32.11	90141	AL832321	EF-hand calcium binding domain 11	chr14:90262091-90262032	GO:0005509	NA	Hs.123232
A_23_P23443	0.00401581	2.11176	up	11.1262	12.2047	EFHD2	Homo sapiens EF-hand domain family, member D2 (EFHD2), mRNA [NM_024329]	15756696	chr1	15756637	+	FALSE	hs|1p36.21	79180	NM_024329	EF-hand domain family, member D2	chr1:15756637-15756696	GO:0016020|GO:0005509|GO:0045121	NM_024329	Hs.465374
A_24_P365807	0.00187995	2.83504	up	12.4288	13.9322	EFNB1	Homo sapiens ephrin-B1 (EFNB1), mRNA [NM_004429]	68061892	chrX	68061833	+	FALSE	hs|Xq13.1	1947	NM_004429	ephrin-B1	chrX:68061833-68061892	GO:0005515|GO:0001755|GO:0007267|GO:0045202|GO:0005625|GO:0005634|GO:0007275|GO:0030154|GO:0007399|GO:0009880|GO:0005737|GO:0046875|GO:0016020|GO:0005887|GO:0007411|GO:0042102|GO:0045121|GO:0007155	NM_004429	Hs.144700
A_23_P216225	0.0067526	2.79381	up	7.30977	8.79201	EGR3	Homo sapiens early growth response 3 (EGR3), transcript variant 1, mRNA [NM_004430]	22546023	chr8	22545964	-	FALSE	hs|8p21.3	1960	NM_004430	early growth response 3	chr8:22546023-22545964	GO:0005622|GO:0006355|GO:0007517|GO:0003700|GO:0007422|GO:0007623|GO:0008270|GO:0005634|GO:0007274|GO:0003677|GO:0046872|GO:0006351	NM_004430	Hs.534313
A_23_P79251	0.00201672	3.36925	down	9.75456	8.00213	EHD3	Homo sapiens EH-domain containing 3 (EHD3), mRNA [NM_014600]	31490628	chr2	31490569	+	FALSE	hs|2p23.1	30845	NM_014600	EH-domain containing 3	chr2:31490569-31490628	GO:0005515|GO:0005886|GO:0032456|GO:0005509|GO:0003924|GO:0030139|GO:0005634|GO:0003676|GO:0005525|GO:0005524|GO:0005737|GO:0000166|GO:0007596|GO:0051260|GO:0055038|GO:0010008|GO:0005768	NM_014600	Hs.368808
A_23_P203540	0.00215594	4.08098	down	12.8125	10.7836	EHF	Homo sapiens ets homologous factor (EHF), transcript variant 2, mRNA [NM_012153]	34681970	chr11	34681911	+	FALSE	hs|11p13	26298	NM_012153	ets homologous factor	chr11:34681911-34681970	GO:0043565|GO:0005515|GO:0003700|GO:0008283|GO:0030855|GO:0007275|GO:0005634|GO:0045893|GO:0003677|GO:0006351	NM_012153	Hs.653859
A_33_P3224858	0.0018752	2.34723	up	8.31174	9.5427	EIF2AK2	Homo sapiens eukaryotic translation initiation factor 2-alpha kinase 2 (EIF2AK2), transcript variant 3, mRNA [NM_001135652]	37368837	chr2	37368778	-	FALSE	hs|2p22.2	5610	NM_001135652	eukaryotic translation initiation factor 2-alpha kinase 2	chr2:37368837-37368778	GO:0003725|GO:0005515|GO:0033689|GO:0008285|GO:0019054|GO:0008601|GO:0019058|GO:0006926|GO:0009615|GO:0005524|GO:0006412|GO:0030968|GO:0005829|GO:0005622|GO:0046777|GO:0004672|GO:0000166|GO:0004674|GO:0044419|GO:0019048|GO:0030683|GO:0006468|GO:0004694|GO:0016772	NM_001135652	Hs.131431
A_23_P142750	0.000954	2.39285	up	11.5072	12.7659	EIF2AK2	Homo sapiens eukaryotic translation initiation factor 2-alpha kinase 2 (EIF2AK2), transcript variant 1, mRNA [NM_002759]	37341880	chr2	37336386	-	FALSE	hs|2p22.2	5610	NM_002759	eukaryotic translation initiation factor 2-alpha kinase 2	chr2:37341880-37336386	GO:0003725|GO:0005515|GO:0033689|GO:0008285|GO:0019054|GO:0008601|GO:0019058|GO:0006926|GO:0009615|GO:0005524|GO:0006412|GO:0030968|GO:0005829|GO:0005622|GO:0046777|GO:0004672|GO:0000166|GO:0004674|GO:0044419|GO:0019048|GO:0030683|GO:0006468|GO:0004694|GO:0016772	NM_002759	Hs.131431
A_23_P104188	0.00502587	3.00523	down	12.3769	10.7894	ELF3	Homo sapiens E74-like factor 3 (ets domain transcription factor, epithelial-specific ) (ELF3), transcript variant 1, mRNA [NM_004433]	201984488	chr1	201984429	+	FALSE	hs|1q32.1	1999	NM_004433	E74-like factor 3 (ets domain transcription factor, epithelial-specific )	chr1:201984429-201984488	GO:0005515|GO:0006355|GO:0003700|GO:0005794|GO:0006366|GO:0060056|GO:0001824|GO:0003713|GO:0005730|GO:0005634|GO:0007275|GO:0009790|GO:0009653|GO:0006351|GO:0043565|GO:0005737|GO:0006954|GO:0008544|GO:0030198|GO:0030855|GO:0045893|GO:0045892	NM_004433	Hs.730618
A_23_P7361	0.00333029	2.33939	down	8.80127	7.57514	ELOVL6	Homo sapiens ELOVL fatty acid elongase 6 (ELOVL6), transcript variant 1, mRNA [NM_024090]	110971230	chr4	110971171	-	FALSE	hs|4q25	79071	NM_024090	ELOVL fatty acid elongase 6	chr4:110971230-110971171	GO:0005515|GO:0016747|GO:0005783|GO:0019367|GO:0030176|GO:0035338|GO:0009922|GO:0016020|GO:0042759|GO:0005789|GO:0019432|GO:0034625|GO:0016021|GO:0044255|GO:0016740	NM_024090	Hs.412939
A_23_P368225	0.00531471	2.72913	up	6.80026	8.2487	EME1	Homo sapiens essential meiotic endonuclease 1 homolog 1 (S. pombe) (EME1), transcript variant 2, mRNA [NM_152463]	48458686	chr17	48458627	+	FALSE	hs|17q21.33	146956	NM_152463	essential meiotic endonuclease 1 homolog 1 (S. pombe)	chr17:48458627-48458686	GO:0005515|GO:0006281|GO:0004519|GO:0016787|GO:0005730|GO:0006310|GO:0005634|GO:0003677|GO:0046872	NM_152463	Hs.514330
A_23_P76488	0.00105187	5.94761	down	17.7112	15.1389	EMP1	Homo sapiens epithelial membrane protein 1 (EMP1), mRNA [NM_001423]	13369621	chr12	13369562	+	FALSE	hs|12p13.1	2012	NM_001423	epithelial membrane protein 1	chr12:13369562-13369621	GO:0008544|GO:0005886|GO:0008283|GO:0016049|GO:0005624|GO:0007275|GO:0016021	NM_001423	Hs.719042
A_23_P56404	0.00535896	7.74501	up	3.77556	6.72883	EN1	Homo sapiens engrailed homeobox 1 (EN1), mRNA [NM_001426]	119600337	chr2	119600278	-	FALSE	hs|2q14.2	2019	NM_001426	engrailed homeobox 1	chr2:119600337-119600278	GO:0003700|GO:0005634|GO:0007275|GO:0009954|GO:0009953|GO:0009653|GO:0043565|GO:0001501|GO:0048666|GO:0045944|GO:0043473|GO:0030917|GO:0030901|GO:0035115|GO:0030902	NM_001426	Hs.271977
A_23_P51397	0.00293839	2.06676	up	11.6482	12.6956	ENAH	Homo sapiens enabled homolog (Drosophila) (ENAH), transcript variant 1, mRNA [NM_001008493]	225683355	chr1	225683296	-	FALSE	hs|1q42.12	55740	NM_001008493	enabled homolog (Drosophila)	chr1:225683355-225683296	GO:0050852|GO:0001725|GO:0017124|GO:0030036|GO:0030054|GO:0050699|GO:0045202|GO:0001843|GO:0046907|GO:0003779|GO:0030175|GO:0030027|GO:0005829|GO:0005737|GO:0007411|GO:0008154|GO:0005856|GO:0005925	NM_001008493	Hs.497893
A_24_P52887	0.00337429	19.4358	down	9.02277	4.74213	ENDOU	Homo sapiens endonuclease, polyU-specific (ENDOU), transcript variant 2, mRNA [NM_006025]	48104677	chr12	48104618	-	FALSE	hs|12q13.11	8909	NM_006025	endonuclease, polyU-specific	chr12:48104677-48104618	GO:0007565|GO:0030145|GO:0005886|GO:0003723|GO:0005576|GO:0004521|GO:0005615|GO:0046872|GO:0005737|GO:0006955|GO:0006508|GO:0008236|GO:0030247|GO:0008083|GO:0005044	NM_006025	Hs.997
A_23_P4536	0.00361761	2.27997	down	9.66197	8.47295	EPB41L3	Homo sapiens erythrocyte membrane protein band 4.1-like 3 (EPB41L3), mRNA [NM_012307]	5393451	chr18	5393392	-	FALSE	hs|18p11.31	23136	NM_012307	erythrocyte membrane protein band 4.1-like 3	chr18:5393451-5393392	GO:0005515|GO:0008150|GO:0005737|GO:0005886|GO:0044224|GO:0030866|GO:0005911|GO:0005198|GO:0033270|GO:0003779|GO:0005856|GO:0019898	NM_012307	Hs.213394
A_33_P3321697	0.00183682	3.08889	down	10.9658	9.33869	EPB41L4A	Homo sapiens erythrocyte membrane protein band 4.1 like 4A (EPB41L4A), mRNA [NM_022140]	111498374	chr5	111498315	-	FALSE	hs|5q22.1	64097	NM_022140	erythrocyte membrane protein band 4.1 like 4A	chr5:111498374-111498315	GO:0008092|GO:0008150|GO:0003674|GO:0005737|GO:0005488|GO:0005575|GO:0005856|GO:0019898	NM_022140	Hs.584954
A_23_P91081	0.00898278	4.00717	up	10.7376	12.7402	EPCAM	Homo sapiens epithelial cell adhesion molecule (EPCAM), mRNA [NM_002354]	47613953	chr2	47613894	+	FALSE	hs|2p21	4072	NM_002354	epithelial cell adhesion molecule	chr2:47613894-47613953	GO:0005515|GO:0016323|GO:0001657|GO:0016324|GO:0008284|GO:0030054|GO:0009986|GO:0005886|GO:0016021|GO:0005923|GO:0016328	NM_002354	Hs.542050
A_24_P205994	0.00800312	12.4163	down	9.51855	5.88439	EPGN	Homo sapiens epithelial mitogen homolog (mouse) (EPGN), mRNA [NM_001013442]	75178841	chr4	75178782	+	FALSE	hs|4q13.3	255324	NM_001013442	epithelial mitogen homolog (mouse)	chr4:75178782-75178841	GO:0050679|GO:0005154|GO:0008284|GO:0045741|GO:0005576|GO:0045840|GO:0001525|GO:0000187|GO:0016020|GO:0005887|GO:0043406|GO:0008083|GO:0004708	NM_001013442	Hs.401237
A_23_P157333	0.000359	3.93696	down	9.30262	7.32554	EPHA1	Homo sapiens EPH receptor A1 (EPHA1), mRNA [NM_005232]	143091310	chr7	143090922	-	FALSE	hs|7q34	2041	NM_005232	EPH receptor A1	chr7:143091310-143090922	GO:0007165|GO:0005003|GO:0016020|GO:0000166|GO:0005887|GO:0004872|GO:0004714|GO:0005524	NM_005232	Hs.89839
A_23_P8834	0.00218369	3.25602	down	11.6324	9.92925	EPHX2	Homo sapiens epoxide hydrolase 2, cytoplasmic (EPHX2), mRNA [NM_001979]	27402174	chr8	27402115	+	FALSE	hs|8p21.1	2053	NM_001979	epoxide hydrolase 2, cytoplasmic	chr8:27402115-27402174	GO:0019439|GO:0005794|GO:0006805|GO:0017144|GO:0072593|GO:0005730|GO:0006874|GO:0009636|GO:0005625|GO:0046872|GO:0042803|GO:0005829|GO:0005737|GO:0006954|GO:0016787|GO:0045909|GO:0008217|GO:0005925|GO:0004301|GO:0005777	NM_001979	Hs.212088
A_23_P130027	0.000825	3.59685	down	11.7878	9.94102	EPN3	Homo sapiens epsin 3 (EPN3), mRNA [NM_017957]	48620115	chr17	48620056	+	FALSE	hs|17q21.33	55040	NM_017957	epsin 3	chr17:48620056-48620115	GO:0048471|GO:0005737|GO:0030136|GO:0005634|GO:0031410|GO:0008289	NM_017957	Hs.670090
A_33_P3220698	0.000772	8.11354	down	15.1934	12.1731	EPS8L1	Homo sapiens EPS8-like 1 (EPS8L1), transcript variant 1, mRNA [NM_133180]	55599290	chr19	55599231	+	FALSE	hs|19q13.42	54869	NM_133180	EPS8-like 1	chr19:55599231-55599290	GO:0008150|GO:0003674|GO:0005737|GO:0005575	NM_133180	Hs.438862
A_23_P147822	0.00230572	5.63742	down	12.013	9.51794	EPS8L2	Homo sapiens EPS8-like 2 (EPS8L2), mRNA [NM_022772]	726977	chr11	726918	+	FALSE	hs|11p15.5	64787	NM_022772	EPS8-like 2	chr11:726918-726977	GO:0005737	NM_022772	Hs.55016
A_23_P105794	0.000793	3.37064	up	7.45935	9.21238	EPSTI1	Homo sapiens epithelial stromal interaction 1 (breast) (EPSTI1), transcript variant 2, mRNA [NM_033255]	43528115	chr13	43500538	-	FALSE	hs|13q14.11	94240	NM_033255	epithelial stromal interaction 1 (breast)	chr13:43528115-43500538	NA	NM_033255	Hs.546467
A_23_P89249	0.00887924	2.1595	down	12.4884	11.3777	ERBB2	Homo sapiens v-erb-b2 erythroblastic leukemia viral oncogene homolog 2, neuro/glioblastoma derived oncogene homolog (avian) (ERBB2), transcript variant 2, mRNA [NM_001005862]	37884888	chr17	37884829	+	FALSE	hs|17q12	2064	NM_001005862	v-erb-b2 erythroblastic leukemia viral oncogene homolog 2, neuro/glioblastoma derived oncogene homolog (avian)	chr17:37884829-37884888	GO:0005515|GO:0033088|GO:0060209|GO:0051879|GO:0046579|GO:0030879|GO:0048678|GO:0042802|GO:0005006|GO:0007507|GO:0046777|GO:0001948|GO:0009925|GO:0007173|GO:0000166|GO:0007411|GO:0045211|GO:0046983|GO:0043125|GO:0031625|GO:0050679|GO:0046982|GO:0019903|GO:0014068|GO:0014065|GO:0048485|GO:0045785|GO:0043235|GO:0001889|GO:0008045|GO:0007519|GO:0007422|GO:0042060|GO:0032570|GO:0010001|GO:0045121|GO:…	NM_001005862	Hs.446352
A_33_P3211569	0.00600558	2.0768	down	9.70723	8.65287	ERBB3	Homo sapiens v-erb-b2 erythroblastic leukemia viral oncogene homolog 3 (avian) (ERBB3), transcript variant s, mRNA [NM_001005915]	56479276	chr12	56479217	+	FALSE	hs|12q13.2	2065	NM_001005915	v-erb-b2 erythroblastic leukemia viral oncogene homolog 3 (avian)	chr12:56479217-56479276	GO:0005515|GO:0005886|GO:0061098|GO:0051048|GO:0005634|GO:0007409|GO:0051402|GO:0005615|GO:0042803|GO:0007507|GO:0016323|GO:0014037|GO:0043524|GO:0016324|GO:0030296|GO:0019838|GO:0000166|GO:0046326|GO:0045211|GO:0042127|GO:0042476|GO:0009968|GO:0032869|GO:0046982|GO:0003197|GO:0060056|GO:0042493|GO:0021545|GO:0005576|GO:0014068|GO:0016328|GO:0005524|GO:0014065|GO:0043235|GO:0007165|GO:0007162|GO:…	NM_001005915	Hs.118681
A_23_P349416	0.00289522	2.59084	down	10.7034	9.32996	ERBB3	Homo sapiens v-erb-b2 erythroblastic leukemia viral oncogene homolog 3 (avian) (ERBB3), transcript variant 1, mRNA [NM_001982]	56496219	chr12	56496160	+	FALSE	hs|12q13.2	2065	NM_001982	v-erb-b2 erythroblastic leukemia viral oncogene homolog 3 (avian)	chr12:56496160-56496219	GO:0005515|GO:0005886|GO:0061098|GO:0051048|GO:0005634|GO:0007409|GO:0051402|GO:0005615|GO:0042803|GO:0007507|GO:0016323|GO:0014037|GO:0043524|GO:0016324|GO:0030296|GO:0019838|GO:0000166|GO:0046326|GO:0045211|GO:0042127|GO:0042476|GO:0009968|GO:0032869|GO:0046982|GO:0003197|GO:0060056|GO:0042493|GO:0021545|GO:0005576|GO:0014068|GO:0016328|GO:0005524|GO:0014065|GO:0043235|GO:0007165|GO:0007162|GO:…	NM_001982	Hs.118681
A_23_P106145	0.00052	7.03616	down	14.2314	11.4166	ERO1L	Homo sapiens ERO1-like (S. cerevisiae) (ERO1L), mRNA [NM_014584]	53113136	chr14	53112990	-	FALSE	hs|14q22.1	30001	NM_014584	ERO1-like (S. cerevisiae)	chr14:53113136-53112990	GO:0005792|GO:0005783|GO:0050660|GO:0005624|GO:0015036|GO:0030968|GO:0009266|GO:0016020|GO:0050873|GO:0006457|GO:0051085|GO:0016671|GO:0005789|GO:0006810|GO:0016491|GO:0005788|GO:0006467|GO:0022900|GO:0006464|GO:0055114	NM_014584	Hs.592304
A_33_P3326210	0.00215618	2.29411	up	6.23065	7.42858	ESCO2	Homo sapiens establishment of cohesion 1 homolog 2 (S. cerevisiae) (ESCO2), mRNA [NM_001017420]	27660889	chr8	27660830	+	FALSE	hs|8p21.1	157570	NM_001017420	establishment of cohesion 1 homolog 2 (S. cerevisiae)	chr8:27660830-27660889	GO:0007049|GO:0034421|GO:0005694|GO:0005634|GO:0000785|GO:0046872|GO:0016740|GO:0006275|GO:0008415	NM_001017420	Hs.99480
A_23_P144843	0.0034113	6.1714	up	2.75456	5.38016	ESM1	Homo sapiens endothelial cell-specific molecule 1 (ESM1), transcript variant 1, mRNA [NM_007036]	54274617	chr5	54274558	-	FALSE	hs|5q11.2	11082	NM_007036	endothelial cell-specific molecule 1	chr5:54274617-54274558	GO:0008150|GO:0005576|GO:0001525|GO:0008083|GO:0001558|GO:0005520	NM_007036	Hs.129944
A_23_P32707	0.000825	3.43915	down	12.1322	10.3501	ESPL1	Homo sapiens extra spindle pole bodies homolog 1 (S. cerevisiae) (ESPL1), mRNA [NM_012291]	53687109	chr12	53686748	+	FALSE	hs|12q13.13	9700	NM_012291	extra spindle pole bodies homolog 1 (S. cerevisiae)	chr12:53686748-53687109	GO:0005515|GO:0005813|GO:0045842|GO:0006915|GO:0005634|GO:0003824|GO:0045875|GO:0000212|GO:0000910|GO:0000070|GO:0005737|GO:0007059|GO:0045143|GO:0040001|GO:0008152|GO:0006508|GO:0008233|GO:0008234	NM_012291	Hs.153479
A_33_P3370848	0.00740067	2.09418	down	7.64596	6.57958	ETV2	Homo sapiens ets variant 2 (ETV2), mRNA [NM_014209]	36134647	chr19	36134588	+	FALSE	hs|19q13.12	2116	NM_014209	ets variant 2	chr19:36134588-36134647	GO:0043565|GO:0003700|GO:0005634	NM_014209	Hs.194061
A_23_P42353	0.00450215	2.87038	up	6.97654	8.49778	ETV7	Homo sapiens ets variant 7 (ETV7), transcript variant 1, mRNA [NM_016135]	36336796	chr6	36336737	-	FALSE	hs|6p21.31	51513	NM_016135	ets variant 7	chr6:36336796-36336737	GO:0043565|GO:0005515|GO:0003700|GO:0006366|GO:0005730|GO:0009887|GO:0005634	NM_016135	Hs.272398
A_24_P104512	0.00309287	2.46935	down	13.2258	11.9217	EVPL	Homo sapiens envoplakin (EVPL), mRNA [NM_001988]	74003067	chr17	74003008	-	FALSE	hs|17q25.1	2125	NM_001988	envoplakin	chr17:74003067-74003008	GO:0030057|GO:0005737|GO:0030054|GO:0018149|GO:0008544|GO:0030216|GO:0005198|GO:0031424|GO:0030674|GO:0001533	NM_001988	Hs.500635
A_24_P49183	0.00219401	2.63237	down	6.37518	4.97882	EXD3	Homo sapiens exonuclease 3'-5' domain containing 3 (EXD3), mRNA [NM_017820]	140218178	chr9	140204095	-	FALSE	hs|9q34.3	54932	NM_017820	exonuclease 3'-5' domain containing 3	chr9:140218178-140204095	GO:0005622|GO:0005515|GO:0008408|GO:0006139|GO:0016787|GO:0003676	NM_017820	Hs.495553
A_23_P23303	0.00894569	3.34024	up	7.20602	8.94598	EXO1	Homo sapiens exonuclease 1 (EXO1), transcript variant 3, mRNA [NM_003686]	242048776	chr1	242048717	+	FALSE	hs|1q43	9156	NM_003686	exonuclease 1	chr1:242048717-242048776	GO:0005515|GO:0035312|GO:0008409|GO:0045190|GO:0051908|GO:0005634|GO:0006310|GO:0016446|GO:0003677|GO:0046872|GO:0004527|GO:0004519|GO:0006281|GO:0007126|GO:0045145|GO:0004523|GO:0043566|GO:0048256|GO:0006298|GO:0002455	NM_003686	Hs.498248
A_23_P403335	0.00299938	3.82785	down	11.5374	9.60087	EXPH5	Homo sapiens exophilin 5 (EXPH5), mRNA [NM_015065]	108379859	chr11	108379800	-	FALSE	hs|11q22.3	23086	NM_015065	exophilin 5	chr11:108379859-108379800	GO:0017137|GO:0006886	NM_015065	Hs.28540
A_23_P205177	0.00643361	2.64305	down	8.37462	6.97242	F10	Homo sapiens coagulation factor X (F10), mRNA [NM_000504]	113803345	chr13	113803286	+	FALSE	hs|13q34	2159	NM_000504	coagulation factor X	chr13:113803286-113803345	GO:0005515|GO:0051897|GO:0005792|GO:0030335|GO:0004252|GO:0005886|GO:0005796|GO:0005509|GO:0005624|GO:0005576|GO:0031233|GO:0017187|GO:0005543|GO:0007596|GO:0007597|GO:0007598|GO:0006508|GO:0005788|GO:0008233|GO:0044267|GO:0043687	NM_000504	Hs.361463
A_23_P213562	0.00109066	2.43633	up	8.33964	9.62435	F2R	Homo sapiens coagulation factor II (thrombin) receptor (F2R), mRNA [NM_001992]	76030728	chr5	76030669	+	FALSE	hs|5q13.3	2149	NM_001992	coagulation factor II (thrombin) receptor	chr5:76030669-76030728	GO:0005515|GO:0031594|GO:0051928|GO:0009653|GO:0043524|GO:0051482|GO:0045211|GO:0032496|GO:0070374|GO:0043123|GO:0031681|GO:0005794|GO:0030335|GO:0004930|GO:0030168|GO:0014068|GO:0043280|GO:0007186|GO:0032967|GO:0005887|GO:0045893|GO:0051930|GO:0007260|GO:0008284|GO:0008285|GO:0005886|GO:0015057|GO:0007262|GO:0035025|GO:0016265|GO:0007204|GO:0007205|GO:0001965|GO:0000186|GO:0006954|GO:0048873|GO:…	NM_001992	Hs.482562
A_24_P558365	0.00034	7.55591	down	7.7906	4.87299	FABP12	Homo sapiens fatty acid binding protein 12 (FABP12), mRNA [NM_001105281]	82437344	chr8	82437285	-	FALSE	hs|8q21.13	646486	NM_001105281	fatty acid binding protein 12	chr8:82437344-82437285	GO:0005215|GO:0008289	NM_001105281	Hs.586370
A_24_P192994	0.00122581	3.20038	up	9.00621	10.6845	FADS1	Homo sapiens fatty acid desaturase 1 (FADS1), mRNA [NM_013402]	61567185	chr11	61567126	-	FALSE	hs|11q12.2	3992	NM_013402	fatty acid desaturase 1	chr11:61567185-61567126	GO:0046456|GO:0005515|GO:0019369|GO:0014070|GO:0005783|GO:0033189|GO:0007267|GO:0005634|GO:0009744|GO:0006810|GO:0044255|GO:0009267|GO:0005792|GO:0032868|GO:0006636|GO:0006355|GO:0000248|GO:0007584|GO:0007568|GO:0006950|GO:0005624|GO:0008654|GO:0016020|GO:0005789|GO:0016491|GO:0045595|GO:0016021|GO:0022900|GO:0055114|GO:0020037	NM_013402	Hs.503546
A_23_P98580	0.00017	3.02475	up	9.62242	11.2192	FADS2	Homo sapiens fatty acid desaturase 2 (FADS2), mRNA [NM_004265]	61634813	chr11	61634754	+	FALSE	hs|11q12.2	9415	NM_004265	fatty acid desaturase 2	chr11:61634754-61634813	GO:0006636|GO:0016020|GO:0005887|GO:0005783|GO:0004768|GO:0016491|GO:0006810|GO:0005789|GO:0005624|GO:0022900|GO:0016717|GO:0020037	NM_004265	Hs.502745
A_33_P3248982	0.0012902	2.52168	down	8.80403	7.46964	FAIM2	Homo sapiens Fas apoptotic inhibitory molecule 2 (FAIM2), mRNA [NM_012306]	50260739	chr12	50260680	-	FALSE	hs|12q13.12	23017	NM_012306	Fas apoptotic inhibitory molecule 2	chr12:50260739-50260680	GO:0030054|GO:0005886|GO:0045211|GO:0045202|GO:0006915|GO:0006916|GO:0016021|GO:0005575|GO:0007417	NM_012306	Hs.567424
A_32_P214925	0.00120393	3.66322	down	9.51861	7.6455	FAM115C	Homo sapiens family with sequence similarity 115, member C (FAM115C), transcript variant 2, mRNA [NM_173678]	143422150	chr7	143422091	+	FALSE	hs|7q35	285966	NM_173678	family with sequence similarity 115, member C	chr7:143422091-143422150	NA	NM_173678	Hs.729402
A_33_P3226167	0.00270106	2.83594	down	16.2399	14.7361	FAM129B	Homo sapiens family with sequence similarity 129, member B (FAM129B), transcript variant 1, mRNA [NM_022833]	130267699	chr9	130267640	-	FALSE	hs|9q33.3	64855	NM_022833	family with sequence similarity 129, member B	chr9:130267699-130267640	GO:0005515	NM_022833	Hs.522401
A_23_P58862	0.00237746	2.25287	down	9.41282	8.24105	FAM135A	Homo sapiens family with sequence similarity 135, member A (FAM135A), transcript variant 2, mRNA [NM_020819]	71232258	chr6	71212478	+	FALSE	hs|6q13	57579	NM_020819	family with sequence similarity 135, member A	chr6:71212478-71232258	NA	NM_020819	Hs.211700
A_23_P256542	0.00670896	2.02118	down	15.1959	14.1807	FAM162A	Homo sapiens family with sequence similarity 162, member A (FAM162A), mRNA [NM_014367]	122128789	chr3	122128730	+	FALSE	hs|3q21.1	26355	NM_014367	family with sequence similarity 162, member A	chr3:122128730-122128789	GO:0005739|GO:0016020|GO:0016021	NM_014367	Hs.584881
A_23_P108673	9.41e-05	4.88719	up	4.61588	6.90488	FAM176A	Homo sapiens family with sequence similarity 176, member A (FAM176A), transcript variant 2, mRNA [NM_032181]	75719826	chr2	75719767	-	FALSE	hs|2p12	84141	NM_032181	family with sequence similarity 176, member A	chr2:75719826-75719767	GO:0005886|GO:0005783|GO:0006914|GO:0005789|GO:0006915|GO:0016021|GO:0005765|GO:0043231	NM_032181	Hs.302346
A_33_P3330404	0.00751837	3.62946	down	10.6933	8.83357	FAM180B	Homo sapiens family with sequence similarity 180, member B (FAM180B), mRNA [NM_001164379]	47610741	chr11	47610682	+	FALSE	hs|11p11.2	399888	NM_001164379	family with sequence similarity 180, member B	chr11:47610682-47610741	GO:0016020|GO:0016021	NM_001164379	Hs.502529
A_23_P304489	0.00129002	6.23974	up	5.44503	8.08651	FAM19A5	Homo sapiens family with sequence similarity 19 (chemokine (C-C motif)-like), member A5 (FAM19A5), transcript variant 2, mRNA [NM_015381]	49146470	chr22	49146411	+	FALSE	hs|22q13.32	25817	NM_015381	family with sequence similarity 19 (chemokine (C-C motif)-like), member A5	chr22:49146411-49146470	GO:0016020|GO:0005576|GO:0016021	NM_015381	Hs.436854
A_23_P250122	0.00221704	2.13045	up	10.584	11.6752	FAM20C	Homo sapiens family with sequence similarity 20, member C (FAM20C), mRNA [NM_020223]	300440	chr7	300381	+	FALSE	hs|7p22.3	56975	NM_020223	family with sequence similarity 20, member C	chr7:300381-300440	GO:0005576	NM_020223	Hs.134742
A_32_P34138	0.00646033	13.9441	down	15.3779	11.5764	FAM25A	Homo sapiens family with sequence similarity 25, member A (FAM25A), mRNA [NM_001146157]	88784446	chr10	88784387	+	FALSE	hs|10q23.2	643161	NM_001146157	family with sequence similarity 25, member A	chr10:88784387-88784446	NA	NM_001146157	Hs.729945
A_23_P166269	0.00214479	10.8369	down	12.3475	8.90959	FAM3B	Homo sapiens family with sequence similarity 3, member B (FAM3B), transcript variant 1, mRNA [NM_058186]	42720647	chr21	42720588	+	FALSE	hs|21q22.3	54097	NM_058186	family with sequence similarity 3, member B	chr21:42720588-42720647	GO:0006915|GO:0005576|GO:0030073|GO:0005615|GO:0005125	NM_058186	Hs.473877
A_23_P41145	0.000912	13.374	down	13.0125	9.27115	FAM3D	Homo sapiens family with sequence similarity 3, member D (FAM3D), mRNA [NM_138805]	58619819	chr3	58619760	-	FALSE	hs|3p14.2	131177	NM_138805	family with sequence similarity 3, member D	chr3:58619819-58619760	GO:0005576|GO:0046676|GO:0005125	NM_138805	Hs.61265
A_33_P3270519	0.00910305	2.24529	down	7.89887	6.73197	FAM40A	Homo sapiens family with sequence similarity 40, member A (FAM40A), mRNA [NM_033088]	110582136	chr1	110582077	+	FALSE	hs|1p13.3	85369	NM_033088	family with sequence similarity 40, member A	chr1:110582077-110582136	GO:0005515|GO:0008150|GO:0003674|GO:0005634	NM_033088	Hs.584996
A_23_P12199	0.00164265	5.93721	down	11.2946	8.72478	FAM46B	Homo sapiens family with sequence similarity 46, member B (FAM46B), mRNA [NM_052943]	27332155	chr1	27332096	-	FALSE	hs|1p36.11	115572	NM_052943	family with sequence similarity 46, member B	chr1:27332155-27332096	NA	NM_052943	Hs.632378
A_33_P3229017	0.00345013	6.118	up	3.00545	5.61851	FAM53C	family with sequence similarity 53, member C [Source:HGNC Symbol;Acc:1336] [ENST00000506710]	137672776	chr5	137672717	+	FALSE	hs|5q31.2	51307	NA	family with sequence similarity 53, member C	chr5:137672717-137672776	NA	NA	NA
A_23_P253752	0.0096893	2.53082	up	7.65841	8.99801	FAM54A	Homo sapiens family with sequence similarity 54, member A (FAM54A), transcript variant 2, mRNA [NM_138419]	136552451	chr6	136552392	-	FALSE	hs|6q23.3	113115	NM_138419	family with sequence similarity 54, member A	chr6:136552451-136552392	NA	NM_138419	Hs.121536
A_23_P160546	0.0012066	3.18953	down	12.4233	10.75	FAM63A	Homo sapiens family with sequence similarity 63, member A (FAM63A), transcript variant 2, mRNA [NM_001040217]	150969378	chr1	150969319	-	FALSE	hs|1q21.3	55793	NM_001040217	family with sequence similarity 63, member A	chr1:150969378-150969319	GO:0005515|GO:0008150|GO:0005575	NM_001040217	Hs.3346
A_33_P3276918	0.00967418	3.15709	up	5.379	7.03759	FAM64A	Homo sapiens family with sequence similarity 64, member A (FAM64A), transcript variant 2, mRNA [NM_001195228]	6352726	chr17	6352667	+	FALSE	hs|17p13.2	54478	NM_001195228	family with sequence similarity 64, member A	chr17:6352667-6352726	GO:0005515|GO:0005730	NM_001195228	Hs.592116
A_24_P418408	0.0030856	3.31905	up	9.92046	11.6512	FAM89A	Homo sapiens family with sequence similarity 89, member A (FAM89A), mRNA [NM_198552]	231155098	chr1	231155039	-	FALSE	hs|1q42.2	375061	NM_198552	family with sequence similarity 89, member A	chr1:231155098-231155039	NA	NM_198552	Hs.38516
A_32_P103695	0.000338	2.78235	up	8.06806	9.54436	FAM92A1	Homo sapiens family with sequence similarity 92, member A1 (FAM92A1), mRNA [NM_145269]	94738694	chr8	94738635	+	FALSE	hs|8q22.1	137392	NM_145269	family with sequence similarity 92, member A1	chr8:94738635-94738694	NA	NM_145269	Hs.125038
A_33_P3386344	0.00721191	2.19917	up	7.17787	8.31483	FANCA	Homo sapiens Fanconi anemia, complementation group A (FANCA), transcript variant 2, mRNA [NM_001018112]	89877175	chr16	89877116	-	FALSE	hs|16q24.3	2175	NM_001018112	Fanconi anemia, complementation group A	chr16:89877175-89877116	GO:0005515|GO:0008585|GO:0005737|GO:0006461|GO:0006281|GO:0042127|GO:0005654|GO:0005634|GO:0008584|GO:0007140	NM_001018112	Hs.290154
A_32_P95729	0.00363447	2.5908	up	9.47009	10.8435	FANCI	Homo sapiens Fanconi anemia, complementation group I (FANCI), transcript variant 2, mRNA [NM_018193]	89858587	chr15	89858528	+	FALSE	hs|15q26.1	55215	NM_018193	Fanconi anemia, complementation group I	chr15:89858528-89858587	GO:0005515|GO:0007049|GO:0006281|GO:0005654|GO:0005634	NM_018193	Hs.513126
A_23_P56746	0.000591	4.59401	up	10.6023	12.802	FAP	Homo sapiens fibroblast activation protein, alpha (FAP), mRNA [NM_004460]	163027307	chr2	163027248	-	FALSE	hs|2q24.2	2191	NM_004460	fibroblast activation protein, alpha	chr2:163027307-163027248	GO:0005515|GO:0030054|GO:0004252|GO:0005886|GO:0031258|GO:0042803|GO:0010716|GO:0030027|GO:0043542|GO:0071438|GO:0046983|GO:0006508|GO:0008236|GO:0008233|GO:0016021|GO:0004222|GO:0008239	NM_004460	Hs.654370
A_24_P163920	0.00710079	2.07059	down	9.34399	8.29395	FAR1	Homo sapiens fatty acyl CoA reductase 1 (FAR1), mRNA [NM_032228]	13732313	chr11	13732254	+	FALSE	hs|11p15.2	84188	NM_032228	fatty acyl CoA reductase 1	chr11:13732254-13732313	GO:0005515|GO:0008610|GO:0005782|GO:0008611|GO:0050062|GO:0016020|GO:0016491|GO:0016021|GO:0005778|GO:0044255|GO:0005777|GO:0010025|GO:0055114	NM_032228	Hs.501991
A_33_P3388331	0.00471568	3.579	up	4.14643	5.98598	FARP1	Homo sapiens FERM, RhoGEF (ARHGEF) and pleckstrin domain protein 1 (chondrocyte-derived) (FARP1), transcript variant 1, mRNA [NM_005766]	99076903	chr13	99076844	+	FALSE	hs|13q32.2	10160	NM_005766	FERM, RhoGEF (ARHGEF) and pleckstrin domain protein 1 (chondrocyte-derived)	chr13:99076844-99076903	GO:0008092|GO:0005622|GO:0005085|GO:0005737|GO:0035023|GO:0005488|GO:0005856|GO:0005089|GO:0019898	NM_005766	Hs.403917
A_23_P69586	0.000332	3.10336	up	9.79223	11.4261	FAT1	Homo sapiens FAT tumor suppressor homolog 1 (Drosophila) (FAT1), mRNA [NM_005245]	187509580	chr4	187509521	-	FALSE	hs|4q35.2	2195	NM_005245	FAT tumor suppressor homolog 1 (Drosophila)	chr4:187509580-187509521	GO:0005515|GO:0048471|GO:0005886|GO:0005509|GO:0007267|GO:0005634|GO:0009653|GO:0016337|GO:0005737|GO:0007163|GO:0016477|GO:0005887|GO:0005911|GO:0007015|GO:0007155|GO:0007156	NM_005245	Hs.481371
A_23_P337934	0.000921	2.30485	up	9.3618	10.5665	FBLIM1	Homo sapiens filamin binding LIM protein 1 (FBLIM1), transcript variant 1, mRNA [NM_017556]	16112744	chr1	16112685	+	FALSE	hs|1p36.21	54751	NM_017556	filamin binding LIM protein 1	chr1:16112685-16112744	GO:0005737|GO:0030054|GO:0034329|GO:0008360|GO:0008270|GO:0007155|GO:0005856|GO:0005938|GO:0005925|GO:0046872|GO:0043231|GO:0005829	NM_017556	Hs.530101
A_23_P103765	0.00576287	4.90022	down	10.069	7.77615	FCER1A	Homo sapiens Fc fragment of IgE, high affinity I, receptor for; alpha polypeptide (FCER1A), mRNA [NM_002001]	159277595	chr1	159276034	+	FALSE	hs|1q23.2	2205	NM_002001	Fc fragment of IgE, high affinity I, receptor for; alpha polypeptide	chr1:159276034-159277595	GO:0019863|GO:0005886|GO:0005887|GO:0004872	NM_002001	Hs.897
A_23_P349083	0.00155964	2.3454	down	10.6303	9.40051	FCHO2	Homo sapiens FCH domain only 2 (FCHO2), transcript variant 1, mRNA [NM_138782]	72385998	chr5	72385939	+	FALSE	hs|5q13.2	115548	NM_138782	FCH domain only 2	chr5:72385939-72385998	NA	NM_138782	Hs.165762
A_24_P251969	0.000812	2.01453	up	2.87827	3.88872	FGF1	Homo sapiens fibroblast growth factor 1 (acidic) (FGF1), transcript variant 1, mRNA [NM_000800]	141973506	chr5	141973447	-	FALSE	hs|5q31.3	2246	NM_000800	fibroblast growth factor 1 (acidic)	chr5:141973506-141973447	GO:0005515|GO:0008286|GO:0008284|GO:0030324|GO:0005634|GO:0001759|GO:0005615|GO:0009653|GO:0030154|GO:0005829|GO:0034605|GO:0005737|GO:0045944|GO:0051781|GO:0005938|GO:0008201|GO:0050679|GO:0010740|GO:0030335|GO:0005730|GO:0005578|GO:0005576|GO:0005104|GO:0007275|GO:0045766|GO:0048155|GO:0045785|GO:0007399|GO:0007165|GO:0008543|GO:0001934|GO:0008083|GO:0045542	NM_000800	Hs.483635
A_23_P88033	0.00880902	3.08318	down	4.72638	3.10196	FGF14	Homo sapiens fibroblast growth factor 14 (FGF14), transcript variant 2, mRNA [NM_175929]	102379079	chr13	102379020	-	FALSE	hs|13q33.1	2259	NM_175929	fibroblast growth factor 14	chr13:102379079-102379020	GO:0008219|GO:0007165|GO:0008543|GO:0007267|GO:0007254|GO:0005634|GO:0005104|GO:0008201|GO:0008083|GO:0007399	NM_175929	Hs.508616
A_23_P212830	0.00785767	2.0192	down	8.27047	7.25669	FGFR3	Homo sapiens fibroblast growth factor receptor 3 (FGFR3), transcript variant 1, mRNA [NM_000142]	1809113	chr4	1809054	+	FALSE	hs|4p16.3	2261	NM_000142	fibroblast growth factor receptor 3	chr4:1809054-1809113	GO:0005515|GO:0051216|GO:0070307|GO:0090263|GO:0045597|GO:0050680|GO:0050731|GO:0005764|GO:0048678|GO:0042802|GO:0061144|GO:0000166|GO:0000165|GO:0031398|GO:0017134|GO:0048546|GO:0048640|GO:0045839|GO:0072148|GO:0001501|GO:0008543|GO:0005887|GO:0060349|GO:0060385|GO:0016049|GO:0009898|GO:0008286|GO:0008284|GO:0048471|GO:0005886|GO:0022010|GO:0045879|GO:0002089|GO:0090102|GO:0004872|GO:0035019|GO:…	NM_000142	Hs.1420
A_23_P150693	0.00226876	2.23973	up	9.63122	10.7945	FJX1	Homo sapiens four jointed box 1 (Drosophila) (FJX1), mRNA [NM_014344]	35642168	chr11	35642109	+	FALSE	hs|11p13	24147	NM_014344	four jointed box 1 (Drosophila)	chr11:35642109-35642168	GO:0005576|GO:0005615	NM_014344	Hs.39384
A_23_P15727	3.6e-05	3.81466	up	7.88137	9.81292	FKBP10	Homo sapiens FK506 binding protein 10, 65 kDa (FKBP10), mRNA [NM_021939]	39979291	chr17	39979229	+	FALSE	hs|17q21.2	60681	NM_021939	FK506 binding protein 10, 65 kDa	chr17:39979229-39979291	GO:0000413|GO:0016020|GO:0006457|GO:0005783|GO:0018208|GO:0005509|GO:0003755|GO:0005788|GO:0005528|GO:0016853	NM_021939	Hs.463035
A_23_P79622	0.00589354	2.11883	up	8.61182	9.69509	FKBP7	Homo sapiens FK506 binding protein 7 (FKBP7), transcript variant 1, mRNA [NM_181342]	179330565	chr2	179330506	-	FALSE	hs|2q31.2	51661	NM_181342	FK506 binding protein 7	chr2:179330565-179330506	GO:0000413|GO:0016020|GO:0006457|GO:0005783|GO:0018208|GO:0005509|GO:0003755|GO:0005788|GO:0005528|GO:0016853	NM_181342	Hs.410378
A_24_P51322	0.00196188	14.163	down	9.43773	5.61368	FLG	Homo sapiens filaggrin (FLG), mRNA [NM_002016]	152279523	chr1	152279465	-	FALSE	hs|1q21.3	2312	NM_002016	filaggrin	chr1:152279523-152279465	GO:0005882|GO:0030216|GO:0005198|GO:0005509|GO:0016023|GO:0007275	NM_002016	Hs.654510
A_23_P406616	0.00218239	2.8931	up	10.0507	11.5833	FLJ36031	Homo sapiens hypothetical protein FLJ36031 (FLJ36031), mRNA [NM_175884]	106300047	chr7	106299988	-	FALSE	hs|7q22.3	168455	NM_175884	hypothetical protein FLJ36031	chr7:106300047-106299988	NA	NM_175884	Hs.29692
A_33_P3311820	0.000438	13.5627	down	7.55962	3.79805	FLJ44674	Homo sapiens cDNA FLJ44674 fis, clone BRACE3007649. [AK128747]	49384000	chr16	49383941	+	FALSE	hs|16q12.1	400535	AK128747	FLJ44674 protein	chr16:49383941-49384000	NA	NA	Hs.514338
A_33_P3275702	0.00462894	6.60067	down	12.8964	10.1738	FMO2	Homo sapiens flavin containing monooxygenase 2 (non-functional) (FMO2), mRNA [NM_001460]	171180010	chr1	171179951	+	FALSE	hs|1q24.3	2327	NM_001460	flavin containing monooxygenase 2 (non-functional)	chr1:171179951-171180010	GO:0050661|GO:0005792|GO:0006805|GO:0072592|GO:0017144|GO:0005783|GO:0050660|GO:0006739|GO:0006082|GO:0044189|GO:0070995|GO:0004497|GO:0004499|GO:0016020|GO:0005789|GO:0009404|GO:0016021|GO:0055114	NM_001460	Hs.144912
A_24_P334130	0.00820727	3.55951	up	8.17519	10.0069	FN1	Homo sapiens fibronectin 1 (FN1), transcript variant 7, mRNA [NM_054034]	216288895	chr2	216288217	-	FALSE	hs|2q35	2335	NM_054034	fibronectin 1	chr2:216288895-216288217	GO:0005515|GO:0005793|GO:0008360|GO:0005518|GO:0009611|GO:0005578|GO:0030168|GO:0005577|GO:0005576|GO:0001525|GO:0006953|GO:0050900|GO:0005615|GO:0031012|GO:0018149|GO:0016477|GO:0007596|GO:0002576|GO:0034446|GO:0031093|GO:0007155|GO:0008201|GO:0005201	NM_054034	Hs.203717
A_23_P407840	1.27e-05	7.26667	up	6.75196	9.61325	FNDC1	Homo sapiens fibronectin type III domain containing 1 (FNDC1), mRNA [NM_032532]	159692763	chr6	159692704	+	FALSE	hs|6q25.3	84624	NM_032532	fibronectin type III domain containing 1	chr6:159692704-159692763	GO:0005737|GO:0031966|GO:0005886|GO:0005911|GO:0001934|GO:0071456|GO:0010666|GO:0005576|GO:0051223	NM_032532	Hs.520525
A_33_P3296940	0.0050396	2.91084	up	6.76946	8.3109	FNDC3B	Homo sapiens fibronectin type III domain containing 3B (FNDC3B), transcript variant 1, mRNA [NM_022763]	171851335	chr3	171851276	+	FALSE	hs|3q26.31	64778	NM_022763	fibronectin type III domain containing 3B	chr3:171851276-171851335	GO:0016020|GO:0005783|GO:0045600|GO:0016021	NM_022763	Hs.159430
A_23_P16834	0.00727203	3.44055	down	8.96704	7.1844	FNDC4	Homo sapiens fibronectin type III domain containing 4 (FNDC4), mRNA [NM_022823]	27715322	chr2	27715263	-	FALSE	hs|2p23.3	64838	NM_022823	fibronectin type III domain containing 4	chr2:27715322-27715263	GO:0016020|GO:0016021	NM_022823	Hs.707362
A_32_P34920	0.00497326	2.31741	up	8.04021	9.25272	FOXD1	Homo sapiens forkhead box D1 (FOXD1), mRNA [NM_004472]	72742495	chr5	72742436	-	FALSE	hs|5q13.2	2297	NM_004472	forkhead box D1	chr5:72742495-72742436	GO:0007389|GO:0003700|GO:0090184|GO:0051216|GO:0003705|GO:0001755|GO:0005634|GO:0009790|GO:0048846|GO:0072213|GO:0060678|GO:0051090|GO:0030513|GO:0003690|GO:0045944|GO:0005667|GO:0006355|GO:0008301|GO:0030318|GO:0003677|GO:0006351|GO:0048485|GO:0048484|GO:0010628|GO:0043565|GO:0072267|GO:0007422|GO:0050935|GO:0048937|GO:0045892|GO:0008134	NM_004472	Hs.519385
A_33_P3355503	0.00828687	3.4579	up	5.9348	7.72469	FOXL1	Homo sapiens forkhead box L1 (FOXL1), mRNA [NM_005250]	86615301	chr16	86615242	+	FALSE	hs|16q24.1	2300	NM_005250	forkhead box L1	chr16:86615242-86615301	GO:0035136|GO:0005667|GO:0007389|GO:0006355|GO:0003700|GO:0030111|GO:0051216|GO:0008301|GO:0003705|GO:0005634|GO:0007275|GO:0009790|GO:0003677|GO:0006351|GO:0030166|GO:0043565|GO:0007507|GO:0051090|GO:0003690|GO:0007420|GO:0007495|GO:0009887|GO:0043010|GO:0008134	NM_005250	Hs.533830
A_23_P151150	0.00613819	2.81388	up	8.632	10.1246	FOXM1	Homo sapiens forkhead box M1 (FOXM1), transcript variant 1, mRNA [NM_202002]	2967381	chr12	2967322	-	FALSE	hs|12p13.33	2305	NM_202002	forkhead box M1	chr12:2967381-2967322	GO:0071156|GO:0005515|GO:0007389|GO:0008284|GO:0003700|GO:0006366|GO:0003705|GO:0090344|GO:0005634|GO:0046578|GO:0009790|GO:0001558|GO:0032873|GO:0051090|GO:0005737|GO:0003690|GO:0045944|GO:0042127|GO:0009888|GO:0005667|GO:0006355|GO:0008301|GO:0019904|GO:0005730|GO:0000122|GO:0003677|GO:0006351|GO:0043565|GO:0001889|GO:0007049|GO:2000377|GO:0045893|GO:0045892|GO:0001570|GO:0008134	NM_202002	Hs.239
A_33_P3351641	0.00731123	3.62846	down	4.61885	2.75949	FOXR2	Homo sapiens forkhead box R2 (FOXR2), mRNA [NM_198451]	55651754	chrX	55651695	+	FALSE	hs|Xp11.21	139628	NM_198451	forkhead box R2	chrX:55651695-55651754	GO:0043565|GO:0051090|GO:0007389|GO:0005667|GO:0003690|GO:0008301|GO:0003705|GO:0009888|GO:0005634|GO:0048513|GO:0009790|GO:0008134	NM_198451	Hs.364260
A_33_P3446495	0.000325	2.88777	down	11.1328	9.60289	FRMD4B	Homo sapiens FERM domain containing 4B (FRMD4B), mRNA [NM_015123]	69219901	chr3	69219842	-	FALSE	hs|3p14.1	23150	NM_015123	FERM domain containing 4B	chr3:69219901-69219842	GO:0005737|GO:0005488|GO:0005856|GO:0001726	NM_015123	Hs.709671
A_33_P3411075	0.00488493	4.12429	up	13.3686	15.4128	FSCN1	Homo sapiens fascin homolog 1, actin-bundling protein (Strongylocentrotus purpuratus) (FSCN1), mRNA [NM_003088]	5646279	chr7	5646220	+	FALSE	hs|7p22.1	6624	NM_003088	fascin homolog 1, actin-bundling protein (Strongylocentrotus purpuratus)	chr7:5646220-5646279	GO:0005515|GO:0001725|GO:0030036|GO:0030054|GO:0008283|GO:0003779|GO:0030175|GO:0015629|GO:0005737|GO:0051015|GO:0016477|GO:0008144|GO:0048870|GO:0071437|GO:0030674|GO:0051017	NM_003088	Hs.118400
A_23_P110531	0.000779	3.41057	up	8.92981	10.6998	FST	Homo sapiens follistatin (FST), transcript variant FST344, mRNA [NM_013409]	52780896	chr5	52780837	+	FALSE	hs|5q11.2	10468	NM_013409	follistatin	chr5:52780837-52780896	GO:0005515|GO:0007389|GO:0007276|GO:0046882|GO:0043395|GO:0032926|GO:0005576|GO:0005634|GO:0000122|GO:0030509|GO:0043616|GO:0031069|GO:0007165|GO:0008585|GO:0051798|GO:0005737|GO:0048185|GO:0002244|GO:0042475|GO:0045596|GO:0004871	NM_013409	Hs.9914
A_23_P212696	0.00370854	2.00874	up	12.7938	13.8001	FSTL1	Homo sapiens follistatin-like 1 (FSTL1), mRNA [NM_007085]	120113491	chr3	120113432	-	FALSE	hs|3q13.33	11167	NM_007085	follistatin-like 1	chr3:120113491-120113432	GO:0005509|GO:0005576|GO:0030509|GO:0008201|GO:0005615	NM_007085	Hs.269512
A_32_P155247	0.00258235	2.01045	up	13.5135	14.521	FTL	Homo sapiens ferritin, light polypeptide (FTL), mRNA [NM_000146]	49469088	chr19	49469029	+	FALSE	hs|19q13.33	2512	NM_000146	ferritin, light polypeptide	chr19:49469029-49469088	GO:0005515|GO:0008219|GO:0005506|GO:0006892|GO:0055072|GO:0005829|GO:0008199|GO:0042802|GO:0006879|GO:0008043|GO:0016491|GO:0006826|GO:0016044	NM_000146	Hs.433670
A_24_P942969	0.00990252	3.14532	down	9.61147	7.95827	FUT2	Homo sapiens fucosyltransferase 2 (secretor status included) (FUT2), transcript variant 1, mRNA [NM_000511]	49208920	chr19	49208861	+	FALSE	hs|19q13.33	2524	NM_000511	fucosyltransferase 2 (secretor status included)	chr19:49208861-49208920	GO:0042355|GO:0030173|GO:0005794|GO:0016020|GO:0016757|GO:0005975|GO:0032580|GO:0008417|GO:0008107|GO:0006486|GO:0016021	NM_000511	Hs.579928
A_23_P360316	0.000488	8.63062	down	13.0072	9.89771	FUT3	Homo sapiens fucosyltransferase 3 (galactoside 3(4)-L-fucosyltransferase, Lewis blood group) (FUT3), transcript variant 1, mRNA [NM_000149]	5843151	chr19	5843092	-	FALSE	hs|19p13.3	2525	NM_000149	fucosyltransferase 3 (galactoside 3(4)-L-fucosyltransferase, Lewis blood group)	chr19:5843151-5843092	GO:0017060|GO:0005794|GO:0016020|GO:0016757|GO:0005975|GO:0032580|GO:0008417|GO:0005624|GO:0006486|GO:0016021	NM_000149	Hs.169238
A_33_P3248203	0.000349	10.0321	down	8.19738	4.87082	FUT5	Homo sapiens fucosyltransferase 5 (alpha (1,3) fucosyltransferase) (FUT5), mRNA [NM_002034]	5866456	chr19	5866397	-	FALSE	hs|19p13.3	2527	NM_002034	fucosyltransferase 5 (alpha (1,3) fucosyltransferase)	chr19:5866456-5866397	GO:0017060|GO:0046920|GO:0042355|GO:0005794|GO:0016020|GO:0016757|GO:0005975|GO:0032580|GO:0008417|GO:0006486|GO:0016021	NM_002034	Hs.631843
A_33_P3222228	0.000331	7.42063	down	9.8326	6.94106	FUT6	Homo sapiens fucosyltransferase 6 (alpha (1,3) fucosyltransferase) (FUT6), transcript variant 1, mRNA [NM_000150]	5831596	chr19	5831537	-	FALSE	hs|19p13.3	2528	NM_000150	fucosyltransferase 6 (alpha (1,3) fucosyltransferase)	chr19:5831596-5831537	GO:0017060|GO:0046920|GO:0042355|GO:0005794|GO:0016020|GO:0016757|GO:0032580|GO:0008417|GO:0006486|GO:0016021	NM_000150	Hs.631846
A_23_P170534	0.000553	15.2781	down	12.6812	8.74783	FUT7	Homo sapiens fucosyltransferase 7 (alpha (1,3) fucosyltransferase) (FUT7), mRNA [NM_004479]	139925373	chr9	139925314	-	FALSE	hs|9q34.3	2529	NM_004479	fucosyltransferase 7 (alpha (1,3) fucosyltransferase)	chr9:139925373-139925314	GO:0046920|GO:0042355|GO:0005794|GO:0016020|GO:0016757|GO:0032580|GO:0008417|GO:0002522|GO:0002361|GO:0006486|GO:0016021	NM_004479	Hs.457
A_23_P141362	0.00320694	2.65659	up	7.81716	9.22674	FZD2	Homo sapiens frizzled family receptor 2 (FZD2), mRNA [NM_001466]	42636669	chr17	42636610	+	FALSE	hs|17q21.31	2535	NM_001466	frizzled family receptor 2	chr17:42636610-42636669	GO:0008406|GO:0007608|GO:0017147|GO:0005886|GO:0007199|GO:0007267|GO:0007409|GO:0009790|GO:0007204|GO:0071305|GO:0007223|GO:0051091|GO:0005737|GO:0030182|GO:0071375|GO:0030855|GO:0090103|GO:0016055|GO:0060070|GO:0060022|GO:0001775|GO:0001944|GO:0042813|GO:0046982|GO:0004930|GO:0060412|GO:0060119|GO:0045177|GO:0007275|GO:0030165|GO:0032589|GO:0003151|GO:0071363|GO:0016020|GO:0007420|GO:0030825|GO:…	NM_001466	Hs.142912
A_33_P3409392	0.000683	2.10842	up	10.057	11.1332	FZD6	Homo sapiens frizzled family receptor 6 (FZD6), transcript variant 1, mRNA [NM_003506]	104344789	chr8	104344731	+	FALSE	hs|8q22.3	8323	NM_003506	frizzled family receptor 6	chr8:104344731-104344789	GO:0042813|GO:0001736|GO:0005515|GO:0008406|GO:0017147|GO:0042472|GO:0005886|GO:0004930|GO:0007199|GO:0045177|GO:0001843|GO:0007275|GO:0001525|GO:0007409|GO:0032589|GO:0030165|GO:0043433|GO:0016327|GO:0033278|GO:0005737|GO:0005887|GO:0090090|GO:0035567	NM_003506	Hs.591863
A_23_P396858	0.00363444	2.41985	up	6.17141	7.44632	FZD8	Homo sapiens frizzled family receptor 8 (FZD8), mRNA [NM_031866]	35927437	chr10	35927378	-	FALSE	hs|10p11.21	8325	NM_031866	frizzled family receptor 8	chr10:35927437-35927378	GO:0042813|GO:0008406|GO:0017147|GO:0033077|GO:0005794|GO:0005886|GO:0004930|GO:0042995|GO:0007409|GO:0009790|GO:0030165|GO:0005737|GO:0007420|GO:0030182|GO:0001934|GO:0016021|GO:0060070|GO:0001944	NM_031866	Hs.302634
A_23_P335239	0.00492378	2.21246	down	7.63252	6.48687	GAB1	Homo sapiens GRB2-associated binding protein 1 (GAB1), transcript variant 1, mRNA [NM_207123]	144390511	chr4	144390452	+	FALSE	hs|4q31.21	2549	NM_207123	GRB2-associated binding protein 1	chr4:144390452-144390511	GO:0008286|GO:0005515|GO:0007173|GO:0008543|GO:0008283|GO:0005070|GO:0005829	NM_207123	Hs.80720
A_23_P203743	0.00216468	2.044	down	10.5159	9.48451	GAB2	Homo sapiens GRB2-associated binding protein 2 (GAB2), transcript variant 2, mRNA [NM_012296]	77926747	chr11	77926688	-	FALSE	hs|11q14.1	9846	NM_012296	GRB2-associated binding protein 2	chr11:77926747-77926688	GO:0005515|GO:0008284|GO:0005886|GO:0043325|GO:0048015|GO:0005547|GO:0030316|GO:0005829|GO:0043306|GO:0005737|GO:0005070|GO:0005068|GO:0007169	NM_012296	Hs.429434
A_23_P374844	0.00687929	3.94429	up	7.13287	9.11264	GAL	Homo sapiens galanin prepropeptide (GAL), mRNA [NM_015973]	68458592	chr11	68458533	+	FALSE	hs|11q13.3	51083	NM_015973	galanin prepropeptide	chr11:68458533-68458592	GO:0032868|GO:0007631|GO:0043627|GO:0043065|GO:0005794|GO:0008285|GO:0042493|GO:0006950|GO:0005576|GO:0005575|GO:0050672|GO:0007399|GO:0006939|GO:0005737|GO:0006954|GO:0007218|GO:0030252|GO:0030141|GO:0005184|GO:0031943|GO:0030073	NM_015973	Hs.278959
A_23_P160154	0.0090803	2.2	down	9.20793	8.07043	GALE	Homo sapiens UDP-galactose-4-epimerase (GALE), transcript variant 1, mRNA [NM_000403]	24123592	chr1	24123533	-	FALSE	hs|1p36.11	2582	NM_000403	UDP-galactose-4-epimerase	chr1:24123592-24123533	GO:0050662|GO:0003978|GO:0005975|GO:0005488|GO:0019388|GO:0016853|GO:0006012|GO:0003824|GO:0044237|GO:0042803|GO:0005829	NM_000403	Hs.632380
A_23_P252462	0.00137064	2.38789	up	5.41678	6.67252	GALNT9	Homo sapiens UDP-N-acetyl-alpha-D-galactosamine:polypeptide N-acetylgalactosaminyltransferase 9 (GalNAc-T9) (GALNT9), transcript variant B, mRNA [NM_021808]	132681726	chr12	132681667	-	FALSE	hs|12q24.33	50614	NM_021808	UDP-N-acetyl-alpha-D-galactosamine:polypeptide N-acetylgalactosaminyltransferase 9 (GalNAc-T9)	chr12:132681726-132681667	GO:0004653|GO:0005794|GO:0016020|GO:0006493|GO:0000139|GO:0016757|GO:0005529|GO:0016021	NM_021808	Hs.301062
A_24_P136522	0.00269481	2.23231	down	4.04402	2.88548	GARNL3	GTPase activating Rap/RanGAP domain-like 3 [Source:HGNC Symbol;Acc:25425] [ENST00000485331]	130107579	chr9	130107520	+	FALSE	hs|9q33.3	84253	AK095679	GTPase activating Rap/RanGAP domain-like 3	chr9:130107520-130107579	GO:0005622|GO:0051056|GO:0005083|GO:0005096	NA	NA
A_23_P129064	0.00961446	2.92829	down	10.9716	9.42156	GATM	Homo sapiens glycine amidinotransferase (L-arginine:glycine amidinotransferase) (GATM), nuclear gene encoding mitochondrial protein, mRNA [NM_001482]	45653514	chr15	45653455	-	FALSE	hs|15q21.1	2628	NM_001482	glycine amidinotransferase (L-arginine:glycine amidinotransferase)	chr15:45653514-45653455	GO:0005515|GO:0010033|GO:0007584|GO:0015068|GO:0005743|GO:0043434|GO:0009790|GO:0042246|GO:0005739|GO:0034641|GO:0005758|GO:0005737|GO:0006601|GO:0016020|GO:0006600|GO:0046689|GO:0006979|GO:0016740	NM_001482	Hs.75335
A_33_P3226050	0.00531905	3.98976	down	12.0431	10.0468	GATSL3	Homo sapiens GATS protein-like 3 (GATSL3), mRNA [NM_001037666]	30681182	chr22	30681123	-	FALSE	hs|22q12.2	652968	NM_001037666	GATS protein-like 3	chr22:30681182-30681123	NA	NM_001037666	Hs.444950
A_23_P62890	0.00154156	3.82023	up	8.17636	10.11	GBP1	Homo sapiens guanylate binding protein 1, interferon-inducible (GBP1), mRNA [NM_002053]	89518848	chr1	89518789	-	FALSE	hs|1p22.2	2633	NM_002053	guanylate binding protein 1, interferon-inducible	chr1:89518848-89518789	GO:0005886|GO:0000166|GO:0019221|GO:0003924|GO:0005525|GO:0060333	NM_002053	Hs.62661
A_23_P74290	0.00074	5.47745	up	9.26208	11.7156	GBP5	Homo sapiens guanylate binding protein 5 (GBP5), transcript variant 1, mRNA [NM_052942]	89726446	chr1	89726387	-	FALSE	hs|1p22.2	115362	NM_052942	guanylate binding protein 5	chr1:89726446-89726387	GO:0071346|GO:0005886|GO:0000166|GO:0003924|GO:0031410|GO:0005525	NM_052942	Hs.513726
A_33_P3217437	0.00411743	7.66938	down	12.4813	9.5422	GBP6	Homo sapiens guanylate binding protein family, member 6 (GBP6), mRNA [NM_198460]	89853707	chr1	89853648	+	FALSE	hs|1p22.2	163351	NM_198460	guanylate binding protein family, member 6	chr1:89853648-89853707	GO:0000166|GO:0003924|GO:0005525	NM_198460	Hs.254338
A_23_P77328	0.000431	2.7799	down	11.0737	9.59862	GCHFR	Homo sapiens GTP cyclohydrolase I feedback regulator (GCHFR), mRNA [NM_005258]	41059569	chr15	41059510	+	FALSE	hs|15q15.1	2644	NM_005258	GTP cyclohydrolase I feedback regulator	chr15:41059510-41059569	GO:0004857|GO:0005515|GO:0042470|GO:0031965|GO:0005625|GO:0005634|GO:0051291|GO:0030425|GO:0005829|GO:0006809|GO:0043234|GO:0009890|GO:0005737|GO:0030742|GO:0006461|GO:0016020|GO:0043105|GO:0016597|GO:0042133|GO:0043106	NM_005258	Hs.631717
A_23_P119886	0.0072949	3.89456	down	4.78065	2.81919	GCKR	Homo sapiens glucokinase (hexokinase 4) regulator (GCKR), mRNA [NM_001486]	27741771	chr2	27741712	+	FALSE	hs|2p23.3	2646	NM_001486	glucokinase (hexokinase 4) regulator	chr2:27741712-27741771	GO:0005515|GO:0001678|GO:0005975|GO:0070095|GO:0005529|GO:0070328|GO:0033133|GO:0005634|GO:0033132|GO:0046415|GO:0055085|GO:0010827|GO:0005829|GO:0008645|GO:0010628|GO:0015758|GO:0009750|GO:0005654|GO:0000060	NM_001486	Hs.89771
A_33_P3423874	0.00285055	10.0394	down	11.1926	7.86496	GCOM1	Homo sapiens GRINL1A complex locus (GCOM1), transcript variant 12, mRNA [NM_001018100]	57977531	chr15	57977472	+	FALSE	hs|15q21.3	145781	NM_001018100	GRINL1A complex locus	chr15:57977472-57977531	GO:0035556|GO:0030864|GO:0031674|GO:0031234	NM_001018100	Hs.437256
A_23_P26511	0.00094	7.48712	down	10.0094	7.10497	GDPD3	Homo sapiens glycerophosphodiester phosphodiesterase domain containing 3 (GDPD3), mRNA [NM_024307]	30123666	chr16	30123523	-	FALSE	hs|16p11.2	79153	NM_024307	glycerophosphodiester phosphodiesterase domain containing 3	chr16:30123666-30123523	GO:0006629|GO:0016787|GO:0016020|GO:0016021|GO:0008889|GO:0006071|GO:0046872	NM_024307	Hs.289015
A_33_P3258330	0.00942729	3.19881	down	8.26708	6.58955	GDPD5	Homo sapiens glycerophosphodiester phosphodiesterase domain containing 5 (GDPD5), mRNA [NM_030792]	75236370	chr11	75236311	-	FALSE	hs|11q13.5	81544	NM_030792	glycerophosphodiester phosphodiesterase domain containing 5	chr11:75236370-75236311	GO:0006629|GO:0048471|GO:0005737|GO:0016787|GO:0016020|GO:0042995|GO:0016021|GO:0008889|GO:0006071|GO:0030426|GO:0012505|GO:0007399	NM_030792	Hs.503297
A_33_P3255304	0.00042	2.28555	up	10.5141	11.7066	GGT5	Homo sapiens gamma-glutamyltransferase 5 (GGT5), transcript variant 1, mRNA [NM_001099781]	24615682	chr22	24615623	-	FALSE	hs|22q11.23	2687	NM_001099781	gamma-glutamyltransferase 5	chr22:24615682-24615623	GO:0019370|GO:0006520|GO:0006954|GO:0005886|GO:0003840|GO:0006750|GO:0042446|GO:0006749|GO:0016021|GO:0006692|GO:0016740|GO:0008415	NM_001099781	Hs.437156
A_23_P66767	0.00429048	3.68045	down	9.09605	7.21617	GGT6	Homo sapiens gamma-glutamyltransferase 6 (GGT6), transcript variant 2, mRNA [NM_153338]	4461325	chr17	4461266	-	FALSE	hs|17p13.2	124975	NM_153338	gamma-glutamyltransferase 6	chr17:4461325-4461266	GO:0016020|GO:0003840|GO:0006750|GO:0016021|GO:0016740|GO:0008415	NM_153338	Hs.130749
A_24_P72064	0.0044891	2.64315	down	7.90901	6.50676	GHR	Homo sapiens growth hormone receptor (GHR), transcript variant 1, mRNA [NM_000163]	42721508	chr5	42721449	+	FALSE	hs|5p12	2690	NM_000163	growth hormone receptor	chr5:42721449-42721508	GO:0005515|GO:0006549|GO:0019530|GO:0045597|GO:0050731|GO:0005615|GO:0042803|GO:0031623|GO:0043025|GO:0004903|GO:0043526|GO:0070064|GO:0032355|GO:0042169|GO:0032869|GO:0009986|GO:0019901|GO:0019903|GO:0051384|GO:0043278|GO:0046449|GO:0006897|GO:0043235|GO:0006600|GO:0005887|GO:0019898|GO:0042977|GO:0005886|GO:0000255|GO:0042523|GO:0043434|GO:0060396|GO:0005634|GO:0032094|GO:0032870|GO:0005739|GO:…	NM_000163	Hs.125180
A_23_P118246	0.00164602	2.57381	up	9.24348	10.6074	GINS2	Homo sapiens GINS complex subunit 2 (Psf2 homolog) (GINS2), mRNA [NM_016095]	85711713	chr16	85711654	-	FALSE	hs|16q24.1	51659	NM_016095	GINS complex subunit 2 (Psf2 homolog)	chr16:85711713-85711654	GO:0006260|GO:0005515|GO:0000084|GO:0006271|GO:0005654|GO:0005634|GO:0000278	NM_016095	Hs.433180
A_33_P3340040	0.00158065	2.89706	up	8.65603	10.1906	GINS4	Homo sapiens GINS complex subunit 4 (Sld5 homolog) (GINS4), mRNA [NM_032336]	41402101	chr8	41402042	+	FALSE	hs|8p11.21	84296	NM_032336	GINS complex subunit 4 (Sld5 homolog)	chr8:41402042-41402101	GO:0006260|GO:0000084|GO:0006271|GO:0005737|GO:0005654|GO:0005634|GO:0000278	NM_032336	Hs.656996
A_23_P204947	0.00256412	3.61002	down	15.6137	13.7617	GJB2	Homo sapiens gap junction protein, beta 2, 26kDa (GJB2), mRNA [NM_004004]	20761974	chr13	20761915	-	FALSE	hs|13q12.11	2706	NM_004004	gap junction protein, beta 2, 26kDa	chr13:20761974-20761915	GO:0005243|GO:0005793|GO:0030054|GO:0005886|GO:0007605|GO:0007267|GO:0016264|GO:0016328|GO:0030539|GO:0006810|GO:0005922|GO:0016021|GO:0016044	NM_004004	Hs.524894
A_23_P35293	0.00503488	2.27249	down	10.4972	9.31297	GJB5	Homo sapiens gap junction protein, beta 5, 31.1kDa (GJB5), mRNA [NM_005268]	35223368	chr1	35223309	+	FALSE	hs|1p34.3	2709	NM_005268	gap junction protein, beta 5, 31.1kDa	chr1:35223309-35223368	GO:0030054|GO:0007154|GO:0060713|GO:0008544|GO:0005886|GO:0060708|GO:0005922|GO:0016021	NM_005268	Hs.198249
A_33_P3273777	0.00945885	6.27033	up	3.74823	6.39677	GJB7	Homo sapiens gap junction protein, beta 7, 25kDa (GJB7), mRNA [NM_198568]	87994055	chr6	87993996	-	FALSE	hs|6q14.3	375519	NM_198568	gap junction protein, beta 7, 25kDa	chr6:87994055-87993996	GO:0030054|GO:0007154|GO:0005886|GO:0005922|GO:0016021	NM_198568	Hs.146727
A_33_P3373358	0.00160355	2.15765	up	10.0572	11.1666	GJC1	Homo sapiens gap junction protein, gamma 1, 45kDa (GJC1), transcript variant 1, mRNA [NM_005497]	42875875	chr17	42875816	-	FALSE	hs|17q21.31	10052	NM_005497	gap junction protein, gamma 1, 45kDa	chr17:42875875-42875816	GO:0030054|GO:0005886|GO:0007268|GO:0016264|GO:0048738|GO:0006936|GO:0006810|GO:0007043|GO:0005921|GO:0005922|GO:0048468|GO:0016021|GO:0001570|GO:0007601|GO:0016044	NM_005497	Hs.726252
A_23_P209246	0.00791583	4.11868	up	6.12736	8.16954	GLI2	Homo sapiens GLI family zinc finger 2 (GLI2), mRNA [NM_005270]	121749735	chr2	121749676	+	FALSE	hs|2q14.2	2736	NM_005270	GLI family zinc finger 2	chr2:121749676-121749735	GO:0005515|GO:0033089|GO:0007389|GO:0021513|GO:0003700|GO:0030324|GO:0008283|GO:0021696|GO:0021983|GO:0021965|GO:0030879|GO:0005634|GO:0009954|GO:0021517|GO:0046872|GO:0007224|GO:0005622|GO:0007507|GO:0021775|GO:0048589|GO:0048666|GO:0007411|GO:0045944|GO:0042475|GO:0006355|GO:0001822|GO:0045740|GO:0021508|GO:0048566|GO:0000122|GO:0006351|GO:0001649|GO:0007418|GO:0009913|GO:0043565|GO:0001501|GO:…	NM_005270	Hs.111867
A_33_P3267356	0.000181	2.20806	up	9.83106	10.9738	GLS	glutaminase [Source:HGNC Symbol;Acc:4331] [ENST00000338435]	191797588	chr2	191797529	+	FALSE	hs|2q32.2	2744	AF097492	glutaminase	chr2:191797529-191797588	GO:0005739|GO:0034641|GO:0002087|GO:0016787|GO:0005759|GO:0004359|GO:0008652|GO:0007610|GO:0007268|GO:0006543|GO:0014047|GO:0007269	NA	Hs.116448
A_33_P3266419	0.00734287	3.86971	down	10.1131	8.16091	GLTP	Homo sapiens glycolipid transfer protein (GLTP), mRNA [NM_016433]	110290419	chr12	110290361	-	FALSE	hs|12q24.11	51228	NM_016433	glycolipid transfer protein	chr12:110290419-110290361	GO:0005737|GO:0051861|GO:0016020|GO:0017089|GO:0046836|GO:0006810|GO:0008289	NM_016433	Hs.381256
A_23_P72068	0.00628535	2.75889	down	9.18435	7.72026	GMDS	Homo sapiens GDP-mannose 4,6-dehydratase (GMDS), mRNA [NM_001500]	1960186	chr6	1960127	-	FALSE	hs|6p25.3	2762	NM_001500	GDP-mannose 4,6-dehydratase	chr6:1960186-1960127	GO:0005622|GO:0050662|GO:0005737|GO:0005975|GO:0005488|GO:0008446|GO:0007159|GO:0019673|GO:0042351|GO:0044237|GO:0016829	NM_001500	Hs.144496
A_24_P98086	0.00773606	2.05532	up	10.3621	11.4014	GNA12	Homo sapiens guanine nucleotide binding protein (G protein) alpha 12 (GNA12), mRNA [NM_007353]	2768442	chr7	2768383	-	FALSE	hs|7p22.3	2768	NM_007353	guanine nucleotide binding protein (G protein) alpha 12	chr7:2768442-2768383	GO:0005515|GO:0005886|GO:0008360|GO:0003924|GO:0007266|GO:0031526|GO:0046872|GO:0007243|GO:0030154|GO:0000166|GO:0004871|GO:0042493|GO:0005834|GO:0030168|GO:0005525|GO:0031683|GO:0001701|GO:0031234|GO:0006184|GO:0007165|GO:0019001|GO:0007186|GO:0007596|GO:0031752|GO:0007188|GO:0042733	NM_007353	Hs.487341
A_23_P216489	0.00115929	2.01936	down	11.2585	10.2446	GNE	Homo sapiens glucosamine (UDP-N-acetyl)-2-epimerase/N-acetylmannosamine kinase (GNE), transcript variant 2, mRNA [NM_005476]	36214701	chr9	36214642	-	FALSE	hs|9p13.3	10020	NM_005476	glucosamine (UDP-N-acetyl)-2-epimerase/N-acetylmannosamine kinase	chr9:36214701-36214642	GO:0008761|GO:0005975|GO:0006054|GO:0006047|GO:0005524|GO:0005829|GO:0005737|GO:0000166|GO:0016301|GO:0009384|GO:0016853|GO:0007155|GO:0009103|GO:0016740	NM_005476	Hs.5920
A_32_P305020	0.00254309	8.42598	up	4.11277	7.18762	GNG4	Homo sapiens guanine nucleotide binding protein (G protein), gamma 4 (GNG4), transcript variant 1, mRNA [NM_001098722]	235711576	chr1	235711517	-	FALSE	hs|1q42.3	2786	NM_001098722	guanine nucleotide binding protein (G protein), gamma 4	chr1:235711576-235711517	GO:0030308|GO:0008277|GO:0006112|GO:0005886|GO:0071377|GO:0005834|GO:0007268|GO:0004871	NM_001098722	Hs.159711
A_23_P209954	0.000499	4.57756	up	7.4847	9.67928	GNLY	Homo sapiens granulysin (GNLY), transcript variant NKG5, mRNA [NM_006433]	85924715	chr2	85924656	+	FALSE	hs|2p11.2	10578	NM_006433	granulysin	chr2:85924656-85924715	GO:0006968|GO:0050832|GO:0031640|GO:0005576|GO:0005615|GO:0042742	NM_006433	Hs.105806
A_24_P191664	0.00360078	2.00559	up	9.44573	10.4498	GOLIM4	Homo sapiens golgi integral membrane protein 4 (GOLIM4), mRNA [NM_014498]	167727993	chr3	167727934	-	FALSE	hs|3q26.2	27333	NM_014498	golgi integral membrane protein 4	chr3:167727993-167727934	GO:0005801|GO:0005794|GO:0016020|GO:0005796|GO:0032580|GO:0006810|GO:0005730|GO:0030139|GO:0005634|GO:0016021|GO:0010008|GO:0005768	NM_014498	Hs.143600
A_33_P3231653	0.00885957	2.27696	up	7.79432	8.98143	GOLM1	Homo sapiens golgi membrane protein 1 (GOLM1), transcript variant 1, mRNA [NM_016548]	88642401	chr9	88642342	-	FALSE	hs|9q21.33	51280	NM_016548	golgi membrane protein 1	chr9:88642401-88642342	GO:0005794|GO:0016020|GO:0005887	NM_016548	Hs.494337
A_33_P3461416	0.000636	5.88217	down	7.03169	4.47534	GP6	Homo sapiens glycoprotein VI (platelet) (GP6), transcript variant 1, mRNA [NM_001083899]	55525459	chr19	55525400	-	FALSE	hs|19q13.42	51206	NM_001083899	glycoprotein VI (platelet)	chr19:55525459-55525400	GO:0005515|GO:0005886|GO:0007596|GO:0005887|GO:0005518|GO:0030168|GO:0004872|GO:0050900|GO:0007167|GO:0004888	NM_001083899	Hs.661752
A_23_P318284	0.000387	4.64926	down	11.1421	8.92513	GPD1L	Homo sapiens glycerol-3-phosphate dehydrogenase 1-like (GPD1L), mRNA [NM_015141]	32209930	chr3	32209871	+	FALSE	hs|3p22.3	23171	NM_015141	glycerol-3-phosphate dehydrogenase 1-like	chr3:32209871-32209930	GO:0009331|GO:0005737|GO:0051287|GO:0005975|GO:0005488|GO:0004367|GO:0042803|GO:0046168	NM_015141	Hs.82432
A_23_P365218	0.00211317	13.6624	down	7.21701	3.44488	GPR110	Homo sapiens G protein-coupled receptor 110 (GPR110), transcript variant 2, mRNA [NM_025048]	46989702	chr6	46988475	-	FALSE	hs|6p12.3	266977	NM_025048	G protein-coupled receptor 110	chr6:46989702-46988475	GO:0007186|GO:0005886|GO:0007218|GO:0004930|GO:0016021	NM_025048	Hs.256897
A_23_P214267	0.0030819	10.0471	down	11.4987	8.16999	GPR110	Homo sapiens G protein-coupled receptor 110 (GPR110), transcript variant 1, mRNA [NM_153840]	46967904	chr6	46967845	-	FALSE	hs|6p12.3	266977	NM_153840	G protein-coupled receptor 110	chr6:46967904-46967845	GO:0007186|GO:0005886|GO:0007218|GO:0004930|GO:0016021	NM_153840	Hs.256897
A_23_P303455	0.00241224	2.23758	up	7.50523	8.66717	GPR161	Homo sapiens G protein-coupled receptor 161 (GPR161), transcript variant 2, mRNA [NM_153832]	168056852	chr1	168055005	-	FALSE	hs|1q24.2	23432	NM_153832	G protein-coupled receptor 161	chr1:168056852-168055005	GO:0005886|GO:0004930|GO:0007275|GO:0004872|GO:0016021	NM_153832	Hs.632453
A_33_P3236813	0.00446985	9.13917	up	3.90298	7.09505	GPR19	Homo sapiens G protein-coupled receptor 19 (GPR19), mRNA [NM_006143]	12814162	chr12	12814103	-	FALSE	hs|12p13.1	2842	NM_006143	G protein-coupled receptor 19	chr12:12814162-12814103	GO:0007186|GO:0005886|GO:0005887|GO:0004930|GO:0004872	NM_006143	Hs.657862
A_33_P3375358	0.000607	5.18027	down	7.09652	4.72349	GPR31	Homo sapiens G protein-coupled receptor 31 (GPR31), mRNA [NM_005299]	167570589	chr6	167570530	-	FALSE	hs|6q27	2853	NM_005299	G protein-coupled receptor 31	chr6:167570589-167570530	GO:0007186|GO:0005886|GO:0005887|GO:0004930|GO:0004872	NM_005299	Hs.248124
A_23_P357284	0.00413582	2.35866	up	7.40173	8.6397	GPR4	Homo sapiens G protein-coupled receptor 4 (GPR4), mRNA [NM_005282]	46093270	chr19	46093211	-	FALSE	hs|19q13.32	2828	NM_005282	G protein-coupled receptor 4	chr19:46093270-46093211	GO:0007186|GO:0005886|GO:0005887|GO:0004930|GO:0004872	NM_005282	Hs.17170
A_33_P3222942	0.00695608	2.20763	down	7.66823	6.52573	GPR78	Homo sapiens G protein-coupled receptor 78 (GPR78), mRNA [NM_080819]	8589507	chr4	8589448	+	FALSE	hs|4p16.1	27201	NM_080819	G protein-coupled receptor 78	chr4:8589448-8589507	GO:0005886|GO:0004930|GO:0004872|GO:0016021|GO:0007189	NM_080819	Hs.350588
A_23_P25155	0.00955343	2.72962	up	5.90299	7.35168	GPR84	Homo sapiens G protein-coupled receptor 84 (GPR84), mRNA [NM_020370]	54756423	chr12	54756364	-	FALSE	hs|12q13.13	53831	NM_020370	G protein-coupled receptor 84	chr12:54756423-54756364	GO:0008150|GO:0005886|GO:0004930|GO:0004872|GO:0016021	NM_020370	Hs.306199
A_23_P105691	0.00703248	8.11287	down	9.16648	6.14626	GPRC5D	Homo sapiens G protein-coupled receptor, family C, group 5, member D (GPRC5D), mRNA [NM_018654]	13102731	chr12	13102672	-	FALSE	hs|12p13.1	55507	NM_018654	G protein-coupled receptor, family C, group 5, member D	chr12:13102731-13102672	GO:0005886|GO:0004930|GO:0004872|GO:0016021	NM_018654	Hs.644599
A_33_P3301871	0.00993056	3.38657	down	6.34101	4.58118	GPT	Homo sapiens glutamic-pyruvate transaminase (alanine aminotransferase) (GPT), mRNA [NM_005309]	145731695	chr8	145731636	+	FALSE	hs|8q24.3	2875	NM_005309	glutamic-pyruvate transaminase (alanine aminotransferase)	chr8:145731636-145731695	GO:0034641|GO:0006807|GO:0005737|GO:0004021|GO:0009058|GO:0016847|GO:0030170|GO:0008483|GO:0006094|GO:0008652|GO:0005829	NM_005309	Hs.103502
A_33_P3369371	0.000458	4.51663	down	10.788	8.61273	GPX3	Homo sapiens glutathione peroxidase 3 (plasma) (GPX3), mRNA [NM_002084]	150407091	chr5	150407032	+	FALSE	hs|5q33.1	2878	NM_002084	glutathione peroxidase 3 (plasma)	chr5:150407032-150407091	GO:0051412|GO:0014070|GO:0007565|GO:0006982|GO:0042493|GO:0002238|GO:0006749|GO:0010269|GO:0005576|GO:0005625|GO:0005615|GO:0004602|GO:0043295|GO:0008430|GO:0051289|GO:0016491|GO:0042744|GO:0006979|GO:0055114|GO:0008134	NM_002084	Hs.730658
A_23_P122052	0.00232964	2.51535	up	8.04718	9.37794	GPX8	Homo sapiens glutathione peroxidase 8 (putative) (GPX8), mRNA [NM_001008397]	54460313	chr5	54460254	+	FALSE	hs|5q11.2	493869	NM_001008397	glutathione peroxidase 8 (putative)	chr5:54460254-54460313	GO:0004602|GO:0016020|GO:0016491|GO:0016021|GO:0006979	NM_001008397	Hs.289044
A_23_P122863	0.00623064	2.75237	up	9.35424	10.8149	GRB10	Homo sapiens growth factor receptor-bound protein 10 (GRB10), transcript variant 4, mRNA [NM_001001555]	50657786	chr7	50657752	-	FALSE	hs|7p12.1	2887	NM_001001555	growth factor receptor-bound protein 10	chr7:50657786-50657752	GO:0005515|GO:0008286|GO:0030949|GO:0032868|GO:0005886|GO:0046627|GO:0005158|GO:0030178|GO:0045719|GO:0005829|GO:0042326|GO:0007165|GO:0005737|GO:0005070|GO:0046325|GO:0048009|GO:0042327	NM_001001555	Hs.164060
A_24_P40626	0.000417	4.87538	down	11.153	8.86749	GREM2	Homo sapiens gremlin 2 (GREM2), mRNA [NM_022469]	240654036	chr1	240653977	-	FALSE	hs|1q43	64388	NM_022469	gremlin 2	chr1:240654036-240653977	GO:0005576|GO:0030509|GO:0005615|GO:0005125	NM_022469	Hs.98206
A_33_P3307144	0.00137641	3.41083	down	4.80251	3.03239	GRIK2	Homo sapiens glutamate receptor, ionotropic, kainate 2 (GRIK2), transcript variant 1, mRNA [NM_021956]	102376420	chr6	102376361	+	FALSE	hs|6q16.3	2898	NM_021956	glutamate receptor, ionotropic, kainate 2	chr6:102376361-102376420	GO:0030424|GO:0030054|GO:0005886|GO:0005234|GO:0045202|GO:0007268|GO:0032839|GO:0051402|GO:0006886|GO:0042803|GO:0019228|GO:0046328|GO:0043524|GO:0045211|GO:0043195|GO:0048169|GO:0042391|GO:0006810|GO:0015277|GO:0043204|GO:0004872|GO:0001662|GO:0031625|GO:0006811|GO:0031624|GO:0031557|GO:0051967|GO:0060079|GO:0006874|GO:0050804|GO:0005624|GO:0007215|GO:0030165|GO:0042734|GO:0060080|GO:0032983|GO:…	NM_021956	Hs.98262
A_23_P404091	0.000742	3.44324	down	11.9798	10.196	GRPEL2	Homo sapiens GrpE-like 2, mitochondrial (E. coli) (GRPEL2), nuclear gene encoding mitochondrial protein, mRNA [NM_152407]	148733654	chr5	148733595	+	FALSE	hs|5q32	134266	NM_152407	GrpE-like 2, mitochondrial (E. coli)	chr5:148733595-148733654	GO:0005739|GO:0005737|GO:0006457|GO:0005759|GO:0051087|GO:0005743|GO:0051082|GO:0042803|GO:0000774	NM_152407	Hs.511816
A_33_P3257903	0.00696121	2.26368	down	10.1892	9.01049	GSTA4	Homo sapiens glutathione S-transferase alpha 4 (GSTA4), mRNA [NM_001512]	52850310	chr6	52850251	-	FALSE	hs|6p12.2	2941	NM_001512	glutathione S-transferase alpha 4	chr6:52850310-52850251	GO:0005737|GO:0006805|GO:0008152|GO:0006749|GO:0004364|GO:0042803|GO:0016740|GO:0005829	NM_001512	Hs.485557
A_24_P304051	0.00119368	2.08144	up	12.3749	13.4325	GSTO1	Homo sapiens glutathione S-transferase omega 1 (GSTO1), transcript variant 1, mRNA [NM_004832]	106025901	chr10	106025842	+	FALSE	hs|10q25.1	9446	NM_004832	glutathione S-transferase omega 1	chr10:106025842-106025901	GO:0008150|GO:0016656|GO:0005737|GO:0006805|GO:0019853|GO:0008152|GO:0004364|GO:0016740|GO:0005829	NM_004832	Hs.190028
A_23_P350001	0.00276791	3.29736	up	4.48658	6.20789	GUCY1A2	Homo sapiens guanylate cyclase 1, soluble, alpha 2 (GUCY1A2), mRNA [NM_000855]	106558464	chr11	106558405	-	FALSE	hs|11q22.3	2977	NM_000855	guanylate cyclase 1, soluble, alpha 2	chr11:106558464-106558405	GO:0035556|GO:0007165|GO:0005737|GO:0000166|GO:0007596|GO:0006182|GO:0030168|GO:0004383|GO:0005525|GO:0020037	NM_000855	Hs.654555
A_33_P3269109	0.00945638	2.48272	up	6.10112	7.41304	GUCY1A3	Homo sapiens guanylate cyclase 1, soluble, alpha 3 (GUCY1A3), transcript variant 6, mRNA [NM_001130686]	156632429	chr4	156632370	+	FALSE	hs|4q32.1	2982	NM_001130686	guanylate cyclase 1, soluble, alpha 3	chr4:156632370-156632429	GO:0007263|GO:0008015|GO:0030168|GO:0004383|GO:0005525|GO:0008074|GO:0035556|GO:0005737|GO:0000166|GO:0007596|GO:0006182|GO:0004872|GO:0020037	NM_001130686	Hs.24258
A_33_P3360311	0.000671	27.117	down	7.92927	3.16814	GYS2	Homo sapiens glycogen synthase 2 (liver) (GYS2), mRNA [NM_021957]	21689385	chr12	21689326	-	FALSE	hs|12p12.1	2998	NM_021957	glycogen synthase 2 (liver)	chr12:21689385-21689326	GO:0005975|GO:0016757|GO:0005978|GO:0043265|GO:0005625|GO:0005626|GO:0006091|GO:0004373|GO:0042803|GO:0005829|GO:0009749|GO:0005737|GO:0006006|GO:0030864|GO:0005856|GO:0005938	NM_021957	Hs.82614
A_24_P38895	0.00583284	2.08053	up	11.611	12.668	H2AFX	Homo sapiens H2A histone family, member X (H2AFX), mRNA [NM_002105]	118964650	chr11	118964591	-	FALSE	hs|11q23.3	3014	NM_002105	H2A histone family, member X	chr11:118964650-118964591	GO:0005515|GO:0000781|GO:0005694|GO:0006334|GO:0005634|GO:0006310|GO:0045739|GO:0003677|GO:0006974|GO:0006302|GO:0042393|GO:0007049|GO:0007126|GO:0006281|GO:0000724|GO:0010212|GO:0005654|GO:0000077|GO:0019899|GO:0000786	NM_002105	Hs.477879
A_33_P3259393	0.00755318	2.68336	up	11.1672	12.5913	HAPLN3	Homo sapiens hyaluronan and proteoglycan link protein 3 (HAPLN3), mRNA [NM_178232]	89420640	chr15	89420581	-	FALSE	hs|15q26.1	145864	NM_178232	hyaluronan and proteoglycan link protein 3	chr15:89420640-89420581	GO:0005540|GO:0005488|GO:0005578|GO:0005576|GO:0007155	NM_178232	Hs.447530
A_23_P393034	0.00263048	5.31872	up	9.48292	11.894	HAS3	Homo sapiens hyaluronan synthase 3 (HAS3), transcript variant 1, mRNA [NM_005329]	69151428	chr16	69151369	+	FALSE	hs|16q22.1	3038	NM_005329	hyaluronan synthase 3	chr16:69151369-69151428	GO:0016020|GO:0005975|GO:0005887|GO:0050501|GO:0016021	NM_005329	Hs.592069
A_23_P339480	0.00468725	2.00649	up	11.4652	12.4698	HAT1	Homo sapiens histone acetyltransferase 1 (HAT1), transcript variant 1, mRNA [NM_003642]	172848246	chr2	172848187	+	FALSE	hs|2q31.1	8520	NM_003642	histone acetyltransferase 1	chr2:172848187-172848246	GO:0005515|GO:0006348|GO:0016573|GO:0007584|GO:0005634|GO:0006323|GO:0016363|GO:0005737|GO:0005654|GO:0006475|GO:0016740|GO:0004402|GO:0008415|GO:0016568	NM_003642	Hs.632532
A_23_P141965	0.00547	2.0525	up	9.84558	10.883	HAUS8	Homo sapiens HAUS augmin-like complex, subunit 8 (HAUS8), transcript variant 1, mRNA [NM_033417]	17160709	chr19	17160650	-	FALSE	hs|19p13.11	93323	NM_033417	HAUS augmin-like complex, subunit 8	chr19:17160709-17160650	GO:0051297|GO:0003674|GO:0007067|GO:0007049|GO:0005813|GO:0005737|GO:0000922|GO:0005874|GO:0070652|GO:0005856|GO:0051225|GO:0051301	NM_033417	Hs.404088
A_33_P3417936	0.00806406	2.20762	down	7.26896	6.12647	HDAC11	Homo sapiens histone deacetylase 11 (HDAC11), transcript variant 1, mRNA [NM_024827]	13543432	chr3	13543373	+	FALSE	hs|3p25.1	79885	NM_024827	histone deacetylase 11	chr3:13543373-13543432	GO:0005515|GO:0032041|GO:0006355|GO:0016575|GO:0005886|GO:0046970|GO:0005634|GO:0000118|GO:0016787|GO:0014003|GO:0004407|GO:0034739|GO:0046969|GO:0008134|GO:0016568	NM_024827	Hs.404802
A_33_P3237664	0.00663417	5.29372	down	8.92792	6.52364	HDAC7	histone deacetylase 7 [Source:HGNC Symbol;Acc:14067] [ENST00000459625]	48178035	chr12	48177976	-	FALSE	hs|12q13.11	51564	AK122588	histone deacetylase 7	chr12:48178035-48177976	GO:0032041|GO:0032703|GO:0046970|GO:0005634|GO:0000122|GO:0005737|GO:0045668|GO:0000118|GO:0016787|GO:0003682|GO:0070491|GO:0005080|GO:0007043|GO:0090050|GO:0034739|GO:0033613|GO:0046969|GO:0001570|GO:0016568	NA	Hs.200063
A_23_P19691	0.0065522	2.06657	down	14.4558	13.4086	HEBP2	Homo sapiens heme binding protein 2 (HEBP2), mRNA [NM_014320]	138726414	chr6	138726355	+	FALSE	hs|6q23.3	23593	NM_014320	heme binding protein 2	chr6:138726355-138726414	GO:0005739|GO:0005737	NM_014320	Hs.486589
A_23_P54006	0.000622	2.02116	down	13.6421	12.6269	HECTD1	Homo sapiens HECT domain containing 1 (HECTD1), mRNA [NM_015382]	31569500	chr14	31569441	-	FALSE	hs|14q12	25831	NM_015382	HECT domain containing 1	chr14:31569500-31569441	GO:0005622|GO:0005515|GO:0004842|GO:0042787|GO:0016881|GO:0016874|GO:0046872|GO:0006464	NM_015382	Hs.708017
A_23_P110196	0.00930279	3.11472	up	7.52817	9.16727	HERC5	Homo sapiens hect domain and RLD 5 (HERC5), mRNA [NM_016323]	89426948	chr4	89426889	+	FALSE	hs|4q22.1	51191	NM_016323	hect domain and RLD 5	chr4:89426889-89426948	GO:0050688|GO:0005515|GO:0048471|GO:0004842|GO:0016881|GO:0032020|GO:0016874|GO:0000079|GO:0009615|GO:0005829|GO:0005622|GO:0005737|GO:0042787|GO:0045087|GO:0032480|GO:0042296	NM_016323	Hs.26663
A_23_P201687	0.00798431	2.6341	down	9.82836	8.43105	HES2	hairy and enhancer of split 2 (Drosophila) [Source:HGNC Symbol;Acc:16005] [ENST00000377836]	6473192	chr1	6473133	-	FALSE	hs|1p36.31	54626	BC012091	hairy and enhancer of split 2 (Drosophila)	chr1:6473192-6473133	GO:0003690|GO:0005634|GO:0045892|GO:0003677	NA	Hs.118727
A_32_P83845	0.00362116	4.31554	up	8.81222	10.9218	HEY1	Homo sapiens hairy/enhancer-of-split related with YRPW motif 1 (HEY1), transcript variant 2, mRNA [NM_001040708]	80676371	chr8	80676312	-	FALSE	hs|8q21.13	23462	NM_001040708	hairy/enhancer-of-split related with YRPW motif 1	chr8:80676371-80676312	GO:0005515|GO:0045746|GO:0006355|GO:0007275|GO:0005634|GO:0001525|GO:0000122|GO:2000678|GO:0003677	NM_001040708	Hs.234434
A_33_P3223116	0.00203724	9.04907	down	10.6503	7.4725	HIPK2	homeodomain interacting protein kinase 2 [Source:HGNC Symbol;Acc:14402] [ENST00000342645]	139268530	chr7	139268471	-	FALSE	hs|7q34	28996	AF207702	homeodomain interacting protein kinase 2	chr7:139268530-139268471	GO:0005515|GO:0008284|GO:0046330|GO:0061072|GO:0046332|GO:0005634|GO:0009952|GO:0060395|GO:0048596|GO:0007224|GO:0030514|GO:0043524|GO:0005737|GO:0000166|GO:0050882|GO:0030182|GO:0007628|GO:0006978|GO:0030511|GO:0031965|GO:0005813|GO:0060235|GO:0003714|GO:0046790|GO:0006915|GO:0010842|GO:0060059|GO:0000122|GO:0005524|GO:0016604|GO:0004672|GO:0004674|GO:0016605|GO:0019048|GO:0043388|GO:0006468|GO:…	NA	Hs.397465
A_23_P408353	0.00238692	2.32311	up	13.7832	14.9992	HLA-A	Homo sapiens major histocompatibility complex, class I, A (HLA-A), transcript variant 1, mRNA [NM_002116]	29913024	chr6	29912381	+	FALSE	hs|6p22.1	3105	NM_002116	major histocompatibility complex, class I, A	chr6:29912381-29913024	GO:0005515|GO:0002474|GO:0005886|GO:0042612|GO:0019221|GO:0050690|GO:0006955|GO:0060337|GO:0000139|GO:0016020|GO:0005887|GO:0019882|GO:0044419|GO:0031901|GO:0050776|GO:0016032|GO:0016021|GO:0060333|GO:0032393	NM_002116	Hs.181244
A_33_P3379967	0.00596435	2.38675	up	9.82568	11.0807	HLA-F	Homo sapiens major histocompatibility complex, class I, F (HLA-F), transcript variant 3, mRNA [NM_001098478]	29692173	chr6	29692114	+	FALSE	hs|6p22.1	3134	NM_001098478	major histocompatibility complex, class I, F	chr6:29692114-29692173	GO:0002474|GO:0006955|GO:0060337|GO:0016020|GO:0005886|GO:0019882|GO:0042612|GO:0050776|GO:0019221|GO:0016021|GO:0060333|GO:0032393	NM_001098478	Hs.519972
A_33_P3379939	0.00668129	2.34836	up	15.2779	16.5095	HLA-F	Homo sapiens major histocompatibility complex, class I, F (HLA-F), transcript variant 2, mRNA [NM_018950]	29693338	chr6	29693280	+	FALSE	hs|6p22.1	3134	NM_018950	major histocompatibility complex, class I, F	chr6:29693280-29693338	GO:0002474|GO:0006955|GO:0060337|GO:0016020|GO:0005886|GO:0019882|GO:0042612|GO:0050776|GO:0019221|GO:0016021|GO:0060333|GO:0032393	NM_018950	Hs.519972
A_24_P311926	0.0022677	2.13223	up	16.4723	17.5646	HLA-G	Homo sapiens major histocompatibility complex, class I, G (HLA-G), mRNA [NM_002127]	29798753	chr6	29798694	+	FALSE	hs|6p22.1	3135	NM_002127	major histocompatibility complex, class I, G	chr6:29798694-29798753	GO:0002474|GO:0005886|GO:0042612|GO:0019221|GO:0006955|GO:0006968|GO:0060337|GO:0016020|GO:0019882|GO:0050776|GO:0016021|GO:0032393|GO:0060333	NM_002127	Hs.512152
A_33_P3357658	0.00399037	2.43227	up	4.50713	5.78943	HMGA2	Homo sapiens high mobility group AT-hook 2 (HMGA2), transcript variant 2, mRNA [NM_003484]	66309299	chr12	66309240	+	FALSE	hs|12q14.3	8091	NM_003484	high mobility group AT-hook 2	chr12:66309240-66309299	GO:0005515|GO:0006355|GO:0006325|GO:0005634|GO:0007275|GO:0000228|GO:0003677|GO:0007049|GO:0007067|GO:0003680|GO:0000785|GO:0040008|GO:0051301	NM_003484	Hs.505924
A_23_P95930	0.00234128	22.7369	up	4.31804	8.82501	HMGA2	Homo sapiens high mobility group AT-hook 2 (HMGA2), transcript variant 1, mRNA [NM_003483]	66359848	chr12	66359789	+	FALSE	hs|12q14.3	8091	NM_003483	high mobility group AT-hook 2	chr12:66359789-66359848	GO:0005515|GO:0006355|GO:0006325|GO:0005634|GO:0007275|GO:0000228|GO:0003677|GO:0007049|GO:0007067|GO:0003680|GO:0000785|GO:0040008|GO:0051301	NM_003483	Hs.505924
A_23_P30495	0.00440317	2.06872	down	12.0988	11.0501	HMGCR	Homo sapiens 3-hydroxy-3-methylglutaryl-CoA reductase (HMGCR), transcript variant 1, mRNA [NM_000859]	74657710	chr5	74657651	+	FALSE	hs|5q13.3	3156	NM_000859	3-hydroxy-3-methylglutaryl-CoA reductase	chr5:74657651-74657710	GO:0050661|GO:0008406|GO:0006695|GO:0008354|GO:0004420|GO:0005783|GO:0015936|GO:0008299|GO:0016020|GO:0005789|GO:0016491|GO:0016021|GO:0005778|GO:0005777	NM_000859	Hs.628096
A_24_P63522	0.00159366	2.61761	down	11.139	9.75079	HMGCS1	Homo sapiens 3-hydroxy-3-methylglutaryl-CoA synthase 1 (soluble) (HMGCS1), transcript variant 2, mRNA [NM_002130]	43290176	chr5	43290117	-	FALSE	hs|5p12	3157	NM_002130	3-hydroxy-3-methylglutaryl-CoA synthase 1 (soluble)	chr5:43290176-43290117	GO:0006629|GO:0006695|GO:0009645|GO:0071445|GO:0003824|GO:0014074|GO:0042803|GO:0005829|GO:0071372|GO:0005737|GO:0071397|GO:0008144|GO:0001101|GO:0033197|GO:0004421|GO:0043177|GO:0042493|GO:0046690|GO:0010243|GO:0005625|GO:0008299|GO:0034698|GO:0001889|GO:0071407|GO:0007420|GO:0055094|GO:0016853|GO:0008584|GO:0016740	NM_002130	Hs.397729
A_23_P99906	0.00409884	2.10693	down	9.39372	8.31858	HOMER2	Homo sapiens homer homolog 2 (Drosophila) (HOMER2), transcript variant 2, mRNA [NM_199330]	83518202	chr15	83518143	-	FALSE	hs|15q25.2	9455	NM_199330	homer homolog 2 (Drosophila)	chr15:83518202-83518143	GO:0005515|GO:0030054|GO:0046982|GO:0005886|GO:0019904|GO:0007216|GO:0045202|GO:0014069|GO:0003779|GO:0030425|GO:0042803|GO:0005737|GO:0030160|GO:0035256|GO:0045211|GO:0043025	NM_199330	Hs.578443
A_33_P3265374	0.00279568	3.79138	up	12.9227	14.8454	HOMER3	Homo sapiens homer homolog 3 (Drosophila) (HOMER3), transcript variant 1, mRNA [NM_001145722]	19040106	chr19	19040047	-	FALSE	hs|19p13.11	9454	NM_001145722	homer homolog 3 (Drosophila)	chr19:19040106-19040047	GO:0005515|GO:0005737|GO:0030054|GO:0005886|GO:0045211|GO:0007216|GO:0045202|GO:0014069|GO:0006605|GO:0005575	NM_001145722	Hs.720208
A_23_P39364	0.00356736	3.81544	up	12.5249	14.4567	HOMER3	Homo sapiens homer homolog 3 (Drosophila) (HOMER3), transcript variant 2, mRNA [NM_004838]	19040086	chr19	19040027	-	FALSE	hs|19p13.11	9454	NM_004838	homer homolog 3 (Drosophila)	chr19:19040086-19040027	GO:0005515|GO:0005737|GO:0030054|GO:0005886|GO:0045211|GO:0007216|GO:0045202|GO:0014069|GO:0006605|GO:0005575	NM_004838	Hs.720208
A_23_P254507	0.00804854	5.0705	down	14.8181	12.476	HOPX	Homo sapiens HOP homeobox (HOPX), transcript variant 2, mRNA [NM_139211]	57514502	chr4	57514443	-	FALSE	hs|4q12	84525	NM_139211	HOP homeobox	chr4:57514502-57514443	GO:0016575|GO:0003700|GO:0048286|GO:0008016|GO:0005634|GO:0007275|GO:0000122|GO:0001829|GO:0007507|GO:0043565|GO:0043415|GO:0051155|GO:0045596	NM_139211	Hs.619396
A_24_P77904	0.00567671	8.56119	up	4.14617	7.24398	HOXA10	Homo sapiens homeobox A10 (HOXA10), transcript variant 1, mRNA [NM_018951]	27211294	chr7	27211235	-	FALSE	hs|7p15.2	3206	NM_018951	homeobox A10	chr7:27211294-27211235	GO:0043565|GO:0005515|GO:0005667|GO:0003700|GO:0007275|GO:0005634|GO:0007283	NM_018951	Hs.110637
A_23_P389281	0.00275302	6.17541	up	3.13729	5.76382	HOXA13	Homo sapiens homeobox A13 (HOXA13), mRNA [NM_000522]	27236733	chr7	27236674	-	FALSE	hs|7p15.2	3209	NM_000522	homeobox A13	chr7:27236733-27236674	GO:0048839|GO:0043065|GO:0003700|GO:0044212|GO:0048844|GO:0045840|GO:0003281|GO:0005634|GO:0007275|GO:0060847|GO:0003677|GO:0060442|GO:0043565|GO:0030539|GO:0001501|GO:0001894|GO:0001886|GO:0048619|GO:0045944|GO:0009887|GO:0035115|GO:0030510|GO:0001570	NM_000522	Hs.592172
A_23_P363316	0.00231552	2.73312	up	5.86955	7.32009	HOXB5	Homo sapiens homeobox B5 (HOXB5), mRNA [NM_002147]	46668865	chr17	46668806	-	FALSE	hs|17q21.32	3215	NM_002147	homeobox B5	chr17:46668865-46668806	GO:0043565|GO:0003700|GO:0048704|GO:0007275|GO:0005634|GO:0045446|GO:0009952|GO:0009653	NM_002147	Hs.654456
A_24_P218805	0.000231	6.46092	up	2.57513	5.26687	HOXC10	Homo sapiens homeobox C10 (HOXC10), mRNA [NM_017409]	54383159	chr12	54383100	+	FALSE	hs|12q13.13	3226	NM_017409	homeobox C10	chr12:54383100-54383159	GO:0050905|GO:0043565|GO:0019907|GO:0008284|GO:0003700|GO:0021520|GO:0007275|GO:0005634	NM_017409	Hs.44276
A_24_P124558	3.75e-05	9.21667	up	4.36816	7.5724	HOXC8	Homo sapiens homeobox C8 (HOXC8), mRNA [NM_022658]	54406370	chr12	54406311	+	FALSE	hs|12q13.13	3224	NM_022658	homeobox C8	chr12:54406311-54406370	GO:0043565|GO:0005515|GO:0006355|GO:0003700|GO:0030182|GO:0048705|GO:0007275|GO:0005634|GO:0000122|GO:0009952|GO:0006351	NM_022658	Hs.664500
A_23_P25150	0.00152665	6.56586	up	6.69499	9.40998	HOXC9	Homo sapiens homeobox C9 (HOXC9), mRNA [NM_006897]	54396671	chr12	54396612	+	FALSE	hs|12q13.13	3225	NM_006897	homeobox C9	chr12:54396612-54396671	GO:0043565|GO:0005515|GO:0003700|GO:0007275|GO:0005634	NM_006897	Hs.658823
A_23_P210164	0.00776199	2.09304	up	7.16259	8.22819	HOXD8	Homo sapiens homeobox D8 (HOXD8), transcript variant 1, mRNA [NM_019558]	176996168	chr2	176996109	+	FALSE	hs|2q31.1	3234	NM_019558	homeobox D8	chr2:176996109-176996168	GO:0043565|GO:0006355|GO:0003700|GO:0048705|GO:0007275|GO:0005634|GO:0009952|GO:0008595|GO:0006351	NM_019558	Hs.301963
A_24_P71904	0.000633	7.85903	down	10.2646	7.29027	HPGD	Homo sapiens hydroxyprostaglandin dehydrogenase 15-(NAD) (HPGD), transcript variant 1, mRNA [NM_000860]	175411745	chr4	175411686	-	FALSE	hs|4q34.1	3248	NM_000860	hydroxyprostaglandin dehydrogenase 15-(NAD)	chr4:175411745-175411686	GO:0006629|GO:0007565|GO:0006693|GO:0007567|GO:0019372|GO:0005730|GO:0070403|GO:0005634|GO:0045786|GO:0003824|GO:0004957|GO:0042803|GO:0005829|GO:0005737|GO:0051287|GO:0005488|GO:0016491|GO:0006631|GO:0007179|GO:0016404	NM_000860	Hs.596913
A_33_P3324206	0.000191	2.49759	up	10.0396	11.3601	HR	Homo sapiens hairless homolog (mouse) (HR), transcript variant 1, mRNA [NM_005144]	21972023	chr8	21971964	-	FALSE	hs|8p21.3	55806	NM_005144	hairless homolog (mouse)	chr8:21972023-21971964	GO:0006355|GO:0003700|GO:0042826|GO:0003714|GO:0005634|GO:0051291|GO:0003677|GO:0006351|GO:0043433|GO:0046872|GO:0046966|GO:0016604|GO:0000118|GO:0042809|GO:0045892	NM_005144	Hs.272367
A_23_P57658	0.00992541	2.44753	down	10.8357	9.54433	HRASLS	Homo sapiens HRAS-like suppressor (HRASLS), mRNA [NM_020386]	192988588	chr3	192988529	+	FALSE	hs|3q29	57110	NM_020386	HRAS-like suppressor	chr3:192988529-192988588	GO:0005737|GO:0005641	NM_020386	Hs.36761
A_24_P301837	0.00645134	2.96112	down	8.56649	7.00035	HRH3	Homo sapiens histamine receptor H3 (HRH3), mRNA [NM_007232]	60791786	chr20	60791727	-	FALSE	hs|20q13.33	11255	NM_007232	histamine receptor H3	chr20:60791786-60791727	GO:0005886|GO:0007187|GO:0005887|GO:0004930|GO:0004872|GO:0004969|GO:0007269	NM_007232	Hs.251399
A_32_P46981	0.00708114	2.71923	down	9.94156	8.49836	HSBP1L1	Homo sapiens heat shock factor binding protein 1-like 1 (HSBP1L1), mRNA [NM_001136180]	77728111	chr18	77726642	+	FALSE	hs|18q23	440498	NM_001136180	heat shock factor binding protein 1-like 1	chr18:77726642-77728111	GO:0046789|GO:0019064|GO:0019031	NM_001136180	Hs.191582
A_23_P162874	0.000159	2.24704	up	14.1047	15.2727	HSP90AA1	Homo sapiens heat shock protein 90kDa alpha (cytosolic), class A member 1 (HSP90AA1), transcript variant 2, mRNA [NM_005348]	102549512	chr14	102549453	-	FALSE	hs|14q32.31	3320	NM_005348	heat shock protein 90kDa alpha (cytosolic), class A member 1	chr14:102549512-102549453	GO:0005515|GO:0006986|GO:0006200|GO:0005886|GO:0050999|GO:0045040|GO:0042803|GO:0045429|GO:0005829|GO:0042802|GO:0005622|GO:0042026|GO:0005737|GO:0000166|GO:0006457|GO:0007411|GO:0000086|GO:0046209|GO:0030235|GO:0006839|GO:0016887|GO:0042470|GO:0030911|GO:0006950|GO:0005524|GO:0007165|GO:0034619|GO:0051082|GO:0000278	NM_005348	Hs.525600
A_23_P2601	0.00167816	2.15509	up	15.0949	16.2027	HSP90B1	Homo sapiens heat shock protein 90kDa beta (Grp94), member 1 (HSP90B1), mRNA [NM_003299]	104341595	chr12	104341536	+	FALSE	hs|12q23.3	7184	NM_003299	heat shock protein 90kDa beta (Grp94), member 1	chr12:104341536-104341595	GO:0005515|GO:0048471|GO:0005783|GO:0003723|GO:0031247|GO:0015031|GO:0005829|GO:0044459|GO:0000166|GO:0006457|GO:0005792|GO:0001666|GO:0042470|GO:0051208|GO:0019903|GO:0005509|GO:0006950|GO:0030496|GO:0046790|GO:0006916|GO:0030433|GO:0005524|GO:0071318|GO:0005789|GO:0005788|GO:0043666|GO:0051082|GO:0050750	NM_003299	Hs.192374
A_33_P3323463	0.00606316	2.93506	up	5.38692	6.94031	HSPA8	heat shock 70kDa protein 8 [Source:HGNC Symbol;Acc:5241] [ENST00000532091]	122929598	chr11	122929539	-	FALSE	hs|11q24.1	3312	NA	heat shock 70kDa protein 8	chr11:122929598-122929539	GO:0005515|GO:0006986|GO:0042470|GO:0042623|GO:0016070|GO:0005886|GO:0009986|GO:0016071|GO:0006892|GO:0007268|GO:0005524|GO:0007269|GO:0005829|GO:0005622|GO:0005737|GO:0000166|GO:0006457|GO:0044419|GO:0030529|GO:0061202|GO:0045892|GO:0016044	NA	NA
A_24_P380349	0.00420949	8.28676	down	7.92512	4.87431	HTR1E	Homo sapiens 5-hydroxytryptamine (serotonin) receptor 1E (HTR1E), mRNA [NM_000865]	87726131	chr6	87726072	+	FALSE	hs|6q14.3	3354	NM_000865	5-hydroxytryptamine (serotonin) receptor 1E	chr6:87726072-87726131	GO:0005515|GO:0004993|GO:0007186|GO:0005886|GO:0007187|GO:0005887|GO:0004930|GO:0007268|GO:0004872|GO:0051378|GO:0007210	NM_000865	Hs.1611
A_23_P97990	0.00284167	2.4838	up	13.2228	14.5353	HTRA1	Homo sapiens HtrA serine peptidase 1 (HTRA1), mRNA [NM_002775]	124274397	chr10	124274338	+	FALSE	hs|10q26.13	5654	NM_002775	HtrA serine peptidase 1	chr10:124274338-124274397	GO:0031012|GO:0004252|GO:0006508|GO:0008233|GO:0005576|GO:0005615|GO:0001558|GO:0005520	NM_002775	Hs.501280
A_33_P3270776	0.000688	4.12774	up	6.7312	8.77656	HTRA3	Homo sapiens HtrA serine peptidase 3 (HTRA3), mRNA [NM_053044]	8288509	chr4	8288450	+	FALSE	hs|4p16.1	94031	NM_053044	HtrA serine peptidase 3	chr4:8288450-8288509	GO:0004252|GO:0006508|GO:0008233|GO:0005576|GO:0001558|GO:0005520	NM_053044	Hs.479119
A_23_P75647	0.00700462	4.35526	down	10.0704	7.94768	HYOU1	Homo sapiens hypoxia up-regulated 1 (HYOU1), transcript variant 1, mRNA [NM_006389]	118915856	chr11	118915797	-	FALSE	hs|11q23.3	10525	NM_006389	hypoxia up-regulated 1	chr11:118915856-118915797	GO:0005515|GO:0001666|GO:0000166|GO:0005783|GO:0006950|GO:0005788|GO:0005524	NM_006389	Hs.277704
A_23_P112026	0.00610235	3.15984	up	8.55821	10.2181	IDO1	Homo sapiens indoleamine 2,3-dioxygenase 1 (IDO1), mRNA [NM_002164]	39785588	chr8	39785529	+	FALSE	hs|8p11.21	3620	NM_002164	indoleamine 2,3-dioxygenase 1	chr8:39785529-39785588	GO:0034641|GO:0007565|GO:0006569|GO:0004833|GO:0033754|GO:0016491|GO:0009055|GO:0046872|GO:0020037|GO:0005829	NM_002164	Hs.840
A_33_P3236102	0.000813	2.31279	up	8.80916	10.0188	IER5L	Homo sapiens immediate early response 5-like (IER5L), mRNA [NM_203434]	131937927	chr9	131937868	-	FALSE	hs|9q34.11	389792	NM_203434	immediate early response 5-like	chr9:131937927-131937868	NA	NM_203434	Hs.529857
A_23_P153745	0.00618808	4.9729	up	12.2357	14.5498	IFI30	Homo sapiens interferon, gamma-inducible protein 30 (IFI30), mRNA [NM_006332]	18288899	chr19	18288840	+	FALSE	hs|19p13.11	10437	NM_006332	interferon, gamma-inducible protein 30	chr19:18288840-18288899	GO:0016667|GO:0030054|GO:0005886|GO:0019221|GO:0042590|GO:0005576|GO:0005764|GO:0060333|GO:0043231	NM_006332	Hs.14623
A_23_P23074	0.00267688	2.98459	up	10.222	11.7995	IFI44	Homo sapiens interferon-induced protein 44 (IFI44), mRNA [NM_006417]	79128538	chr1	79128479	+	FALSE	hs|1p31.1	10561	NM_006417	interferon-induced protein 44	chr1:79128479-79128538	GO:0005737|GO:0009615	NM_006417	Hs.82316
A_23_P45871	0.00320633	3.61406	up	8.97075	10.8244	IFI44L	Homo sapiens interferon-induced protein 44-like (IFI44L), mRNA [NM_006820]	79107649	chr1	79107590	+	FALSE	hs|1p31.1	10964	NM_006820	interferon-induced protein 44-like	chr1:79107590-79107649	GO:0005737	NM_006820	Hs.389724
A_23_P201459	0.00216811	5.18155	up	10.3374	12.7107	IFI6	Homo sapiens interferon, alpha-inducible protein 6 (IFI6), transcript variant 3, mRNA [NM_022873]	27992896	chr1	27992837	-	FALSE	hs|1p36.11	2537	NM_022873	interferon, alpha-inducible protein 6	chr1:27992896-27992837	GO:0005739|GO:0005515|GO:0006955|GO:0060337|GO:0016020|GO:0051902|GO:0019221|GO:0006916|GO:0001836|GO:0016021|GO:0043154	NM_022873	Hs.523847
A_24_P304071	0.00275884	3.17655	up	7.86253	9.52999	IFIT2	Homo sapiens interferon-induced protein with tetratricopeptide repeats 2 (IFIT2), mRNA [NM_001547]	91066672	chr10	91066613	+	FALSE	hs|10q23.31	3433	NM_001547	interferon-induced protein with tetratricopeptide repeats 2	chr10:91066613-91066672	GO:0032091|GO:0005515|GO:0008150|GO:0003674|GO:0060337|GO:0035457|GO:0019221|GO:0005575|GO:0009615	NM_001547	Hs.437609
A_33_P3283611	0.00249563	3.05986	up	8.96596	10.5794	IFIT3	Homo sapiens interferon-induced protein with tetratricopeptide repeats 3 (IFIT3), transcript variant 1, mRNA [NM_001549]	91099821	chr10	91099762	+	FALSE	hs|10q23.31	3437	NM_001549	interferon-induced protein with tetratricopeptide repeats 3	chr10:91099762-91099821	GO:0005515|GO:0008150|GO:0003674|GO:0060337|GO:0035457|GO:0005488|GO:0019221|GO:0005575	NM_001549	Hs.47338
A_33_P3423941	0.00318993	3.02699	up	12.4277	14.0256	IFITM1	Homo sapiens interferon induced transmembrane protein 1 (9-27) (IFITM1), mRNA [NM_003641]	315113	chr11	315054	+	FALSE	hs|11p15.5	8519	NM_003641	interferon induced transmembrane protein 1 (9-27)	chr11:315054-315113	GO:0009607|GO:0005515|GO:0060337|GO:0008285|GO:0005886|GO:0045087|GO:0050776|GO:0019221|GO:0016021|GO:0005057|GO:0009615|GO:0007166	NM_003641	Hs.458414
A_24_P287043	0.00335269	2.17132	up	13.7743	14.8929	IFITM2	Homo sapiens interferon induced transmembrane protein 2 (1-8D) (IFITM2), mRNA [NM_006435]	309168	chr11	309109	+	FALSE	hs|11p15.5	10581	NM_006435	interferon induced transmembrane protein 2 (1-8D)	chr11:309109-309168	GO:0009607|GO:0005515|GO:0006955|GO:0060337|GO:0005886|GO:0045087|GO:0019221|GO:0016021|GO:0009615	NM_006435	Hs.709321
A_23_P87545	0.00102998	2.64675	up	14.4649	15.8691	IFITM3	Homo sapiens interferon induced transmembrane protein 3 (IFITM3), mRNA [NM_021034]	319914	chr11	319855	-	FALSE	hs|11p15.5	10410	NM_021034	interferon induced transmembrane protein 3	chr11:319914-319855	GO:0009607|GO:0006955|GO:0060337|GO:0005886|GO:0045087|GO:0019221|GO:0016021|GO:0009615	NM_021034	Hs.374650
A_23_P150609	0.00548632	3.23923	up	12.028	13.7237	IGF2	Homo sapiens insulin-like growth factor 2 (somatomedin A) (IGF2), transcript variant 1, mRNA [NM_000612]	2150453	chr11	2150394	-	FALSE	hs|11p15.5	3481	NM_000612	insulin-like growth factor 2 (somatomedin A)	chr11:2150453-2150394	GO:0005515|GO:0008286|GO:0051897|GO:0008284|GO:0071902|GO:0005159|GO:0005158|GO:0050731|GO:2000273|GO:0005615|GO:0042104|GO:0035558|GO:0006006|GO:0051781|GO:2000467|GO:0006355|GO:0045725|GO:0005975|GO:0046628|GO:0005576|GO:0007275|GO:0045840|GO:0043085|GO:0001501|GO:0005179|GO:0001503|GO:0030546|GO:0006349|GO:0001934|GO:0043410|GO:0043539|GO:0008083	NM_000612	Hs.272259
A_33_P3242973	0.00194698	8.16386	up	3.93106	6.96031	IGF2BP2	Homo sapiens insulin-like growth factor 2 mRNA binding protein 2 (IGF2BP2), transcript variant 1, mRNA [NM_006548]	185364863	chr3	185363403	-	FALSE	hs|3q27.2	10644	NM_006548	insulin-like growth factor 2 mRNA binding protein 2	chr3:185364863-185363403	GO:0005515|GO:0017148|GO:0044430|GO:0048027|GO:0003723|GO:0005634|GO:0009653|GO:0045182|GO:0005829|GO:0042035|GO:0005737|GO:0000166|GO:0003730	NM_006548	Hs.35354
A_23_P42868	0.00344848	3.50232	down	5.45098	3.64267	IGFBP1	Homo sapiens insulin-like growth factor binding protein 1 (IGFBP1), mRNA [NM_000596]	45933025	chr7	45932966	+	FALSE	hs|7p12.3	3484	NM_000596	insulin-like growth factor binding protein 1	chr7:45932966-45933025	GO:0008286|GO:0007165|GO:0030307|GO:0005576|GO:0042246|GO:0005615|GO:0005520	NM_000596	Hs.642938
A_23_P215634	4.54e-05	4.59409	up	9.41618	11.616	IGFBP3	Homo sapiens insulin-like growth factor binding protein 3 (IGFBP3), transcript variant 1, mRNA [NM_001013398]	45952667	chr7	45952608	-	FALSE	hs|7p12.3	3486	NM_001013398	insulin-like growth factor binding protein 3	chr7:45952667-45952608	GO:0005515|GO:0043065|GO:0008285|GO:0031994|GO:0048662|GO:0005576|GO:0005634|GO:0001558|GO:0005615|GO:0046872|GO:0014912|GO:0016942|GO:0008160|GO:0045663|GO:0001933|GO:0006468|GO:0009968|GO:0005520	NM_001013398	Hs.450230
A_23_P353035	0.00137534	2.30341	up	15.3325	16.5363	IGFBP7	Homo sapiens insulin-like growth factor binding protein 7 (IGFBP7), mRNA [NM_001553]	57897482	chr4	57897423	-	FALSE	hs|4q12	3490	NM_001553	insulin-like growth factor binding protein 7	chr4:57897482-57897423	GO:0031012|GO:0005515|GO:0008285|GO:0005576|GO:0007155|GO:0005615|GO:0001558|GO:0005520	NM_001553	Hs.479808
A_33_P3289845	0.000463	6.60893	down	10.5263	7.80186	IGFL1	Homo sapiens IGF-like family member 1 (IGFL1), mRNA [NM_198541]	46733773	chr19	46733714	+	FALSE	hs|19q13.32	374918	NM_198541	IGF-like family member 1	chr19:46733714-46733773	GO:0005515|GO:0005576|GO:0005615	NM_198541	Hs.546554
A_33_P3243454	0.00865872	8.60459	up	3.30941	6.41452	IGFL3	Homo sapiens IGF-like family member 3 (IGFL3), mRNA [NM_207393]	46623513	chr19	46623454	-	FALSE	hs|19q13.32	388555	NM_207393	IGF-like family member 3	chr19:46623513-46623454	GO:0005515|GO:0005576	NM_207393	Hs.365496
A_23_P125303	0.00392948	2.84573	down	4.99704	3.48824	IGSF1	Homo sapiens immunoglobulin superfamily, member 1 (IGSF1), transcript variant 1, mRNA [NM_001555]	130408747	chrX	130408688	-	FALSE	hs|Xq26.2	3547	NM_001555	immunoglobulin superfamily, member 1	chrX:130408747-130408688	GO:0005515|GO:0007165|GO:0006355|GO:0048186|GO:0016020|GO:0048187|GO:0005576|GO:0004872|GO:0016021|GO:0015026	NM_001555	Hs.22111
A_33_P3371989	0.00983338	2.12049	down	5.46849	4.38409	IGSF1	Homo sapiens immunoglobulin superfamily, member 1 (IGSF1), transcript variant 2, mRNA [NM_205833]	130418206	chrX	130418147	-	FALSE	hs|Xq26.2	3547	NM_205833	immunoglobulin superfamily, member 1	chrX:130418206-130418147	GO:0005515|GO:0007165|GO:0006355|GO:0048186|GO:0016020|GO:0048187|GO:0005576|GO:0004872|GO:0016021|GO:0015026	NM_205833	Hs.22111
A_23_P53467	0.0069851	2.02439	up	8.52748	9.54497	IKBIP	Homo sapiens IKBKB interacting protein (IKBIP), transcript variant 2, mRNA [NM_201612]	99007538	chr12	99007479	-	FALSE	hs|12q23.1	121457	NM_201612	IKBKB interacting protein	chr12:99007538-99007479	GO:0005515|GO:0016020|GO:0010165|GO:0005783|GO:0005789|GO:0016021|GO:0006917	NM_201612	Hs.252543
A_32_P114284	0.000893	4.42133	down	12.5039	10.3594	IKZF2	Homo sapiens IKAROS family zinc finger 2 (Helios) (IKZF2), transcript variant 2, mRNA [NM_001079526]	213864595	chr2	213864536	-	FALSE	hs|2q34	22807	NM_001079526	IKAROS family zinc finger 2 (Helios)	chr2:213864595-213864536	GO:0005622|GO:0008150|GO:0003674|GO:0006355|GO:0046982|GO:0008270|GO:0005634|GO:0003677|GO:0046872|GO:0042803	NM_001079526	Hs.604950
A_23_P126735	0.00803303	2.10525	up	5.80018	6.87417	IL10	Homo sapiens interleukin 10 (IL10), mRNA [NM_000572]	206941453	chr1	206941394	-	FALSE	hs|1q32.1	3586	NM_000572	interleukin 10	chr1:206941453-206941394	GO:0005515|GO:0010468|GO:0051045|GO:0032715|GO:0002237|GO:0007267|GO:0001818|GO:0050715|GO:0005615|GO:0042130|GO:0002740|GO:0051091|GO:0042092|GO:0006955|GO:0006954|GO:0045019|GO:0042100|GO:0071392|GO:0045347|GO:0002904|GO:0030183|GO:0032496|GO:0034465|GO:0030097|GO:0032868|GO:0014823|GO:0043066|GO:0010033|GO:0045191|GO:0030595|GO:0042493|GO:0007253|GO:0042536|GO:0006950|GO:0030889|GO:0051384|GO:…	NM_000572	Hs.193717
A_33_P3243887	0.00311721	18.3107	up	5.50741	9.70202	IL11	Homo sapiens interleukin 11 (IL11), mRNA [NM_000641]	55875847	chr19	55875788	-	FALSE	hs|19q13.42	3589	NM_000641	interleukin 11	chr19:55875847-55875788	GO:0008284|GO:0005142|GO:0007267|GO:0050731|GO:0030168|GO:0005576|GO:0005125|GO:0005615|GO:0046888|GO:0005737|GO:0033138|GO:0045944|GO:0030219|GO:0030183|GO:0045444|GO:0043410|GO:0008083	NM_000641	Hs.467304
A_23_P104798	0.00081	6.32729	down	11.5364	8.87484	IL18	Homo sapiens interleukin 18 (interferon-gamma-inducing factor) (IL18), mRNA [NM_001562]	112020870	chr11	112020811	-	FALSE	hs|11q23.1	3606	NM_001562	interleukin 18 (interferon-gamma-inducing factor)	chr11:112020870-112020811	GO:0070301|GO:0009409|GO:0032819|GO:0030155|GO:0005615|GO:0032757|GO:0043525|GO:0071356|GO:0032729|GO:0032760|GO:0032725|GO:0042253|GO:0030431|GO:0032722|GO:0005125|GO:0048546|GO:0001649|GO:0071346|GO:0032967|GO:0055093|GO:0051142|GO:0030324|GO:0032731|GO:0007267|GO:0042088|GO:0005829|GO:0042094|GO:0042104|GO:0016324|GO:0005737|GO:0006955|GO:0042092|GO:0060312|GO:0071374|GO:0071375|GO:0042095|GO:…	NM_001562	Hs.83077
A_33_P3246833	0.000803	5.6443	down	17.4149	14.9181	IL1RN	Homo sapiens interleukin 1 receptor antagonist (IL1RN), transcript variant 4, mRNA [NM_173843]	113891590	chr2	113891531	+	FALSE	hs|2q13	3557	NM_173843	interleukin 1 receptor antagonist	chr2:113891531-113891590	GO:0005515|GO:0006629|GO:0014070|GO:0002439|GO:0005886|GO:0014050|GO:0005634|GO:0005152|GO:0005615|GO:0005622|GO:0005737|GO:0006955|GO:0006954|GO:0001960|GO:0004872|GO:0007613|GO:0043507|GO:0005813|GO:0007565|GO:0043066|GO:0042493|GO:0010243|GO:0051384|GO:0005576|GO:0005125|GO:0031982|GO:0030073	NM_173843	Hs.81134
A_33_P3232692	0.00583898	8.30146	up	6.64564	9.699	IL24	Homo sapiens interleukin 24 (IL24), transcript variant 3, mRNA [NM_001185156]	207076816	chr1	207076757	+	FALSE	hs|1q32.1	11009	NM_001185156	interleukin 24	chr1:207076757-207076816	GO:0006915|GO:0005576|GO:0005615|GO:0005125	NM_001185156	Hs.58831
A_24_P230563	0.00539693	5.94932	up	5.59016	8.16289	IL2RA	Homo sapiens interleukin 2 receptor, alpha (IL2RA), mRNA [NM_000417]	6067898	chr10	6067839	-	FALSE	hs|10p15.1	3559	NM_000417	interleukin 2 receptor, alpha	chr10:6067898-6067839	GO:0002437|GO:0050687|GO:0004911|GO:0043065|GO:0005886|GO:0008283|GO:0006915|GO:0006924|GO:0042130|GO:0042104|GO:0006955|GO:0050777|GO:0050728|GO:0008144|GO:0004872|GO:0046013|GO:0016021|GO:0045582|GO:0007166|GO:0009897	NM_000417	Hs.231367
A_33_P3346826	0.00823107	2.73261	up	9.08038	10.5307	IL32	Homo sapiens interleukin 32 (IL32), transcript variant 4, mRNA [NM_001012633]	3119073	chr16	3119014	+	FALSE	hs|16p13.3	9235	NM_001012633	interleukin 32	chr16:3119014-3119073	GO:0006955|GO:0006952|GO:0005576|GO:0007155|GO:0005615|GO:0005125	NM_001012633	Hs.943
A_23_P15146	0.00371005	3.40364	up	9.92555	11.6926	IL32	Homo sapiens interleukin 32 (IL32), transcript variant 1, mRNA [NM_001012631]	3119367	chr16	3119308	+	FALSE	hs|16p13.3	9235	NM_001012631	interleukin 32	chr16:3119308-3119367	GO:0006955|GO:0006952|GO:0005576|GO:0007155|GO:0005615|GO:0005125	NM_001012631	Hs.943
A_23_P100386	0.000913	2.7965	down	6.48131	4.99769	IL34	Homo sapiens interleukin 34 (IL34), transcript variant 1, mRNA [NM_152456]	70690551	chr16	70688562	+	FALSE	hs|16q22.1	146433	NM_152456	interleukin 34	chr16:70688562-70690551	GO:0008284|GO:0005157|GO:0001934|GO:0005576|GO:0008083|GO:0005615|GO:0005125	NM_152456	Hs.461214
A_23_P348028	0.000568	13.0396	down	11.5421	7.83726	IL36A	Homo sapiens interleukin 36, alpha (IL36A), mRNA [NM_014440]	113765496	chr2	113765437	+	FALSE	hs|2q13	27179	NM_014440	interleukin 36, alpha	chr2:113765437-113765496	GO:0006955|GO:0005149|GO:0006954|GO:0005576|GO:0005615|GO:0005125	NM_014440	Hs.278910
A_33_P3405424	0.00727459	5.1919	up	8.60228	10.9785	IL4I1	Homo sapiens interleukin 4 induced 1 (IL4I1), transcript variant 2, mRNA [NM_172374]	50392976	chr19	50392917	-	FALSE	hs|19q13.33	259307	NM_172374	interleukin 4 induced 1	chr19:50392976-50392917	GO:0001716|GO:0016491|GO:0009072|GO:0005764	NM_172374	Hs.574492
A_32_P87013	0.00524847	12.7144	up	7.3485	11.0169	IL8	Homo sapiens interleukin 8 (IL8), mRNA [NM_000584]	74609324	chr4	74609265	+	FALSE	hs|4q13.3	3576	NM_000584	interleukin 8	chr4:74609265-74609324	GO:0005515|GO:0005153|GO:0008285|GO:0019722|GO:0002237|GO:0006928|GO:0005615|GO:0030155|GO:0005622|GO:0035556|GO:0045091|GO:0006955|GO:0006954|GO:0006935|GO:0007050|GO:0030097|GO:0008009|GO:0030593|GO:0005576|GO:0001525|GO:0048566|GO:0050930|GO:0007165|GO:0071222|GO:0007186|GO:0090023|GO:0042119	NM_000584	Hs.624
A_33_P3243230	0.0050515	6.22412	up	5.32464	7.96251	IL8	interleukin 8 [Source:HGNC Symbol;Acc:6025] [ENST00000401931]	74608041	chr4	74607982	+	FALSE	hs|4q13.3	3576	NA	interleukin 8	chr4:74607982-74608041	GO:0005515|GO:0005153|GO:0008285|GO:0019722|GO:0002237|GO:0006928|GO:0005615|GO:0030155|GO:0005622|GO:0035556|GO:0045091|GO:0006955|GO:0006954|GO:0006935|GO:0007050|GO:0030097|GO:0008009|GO:0030593|GO:0005576|GO:0001525|GO:0048566|GO:0050930|GO:0007165|GO:0071222|GO:0007186|GO:0090023|GO:0042119	NA	NA
A_23_P394836	0.000586	9.05908	down	13.7725	10.5931	INF2	Homo sapiens inverted formin, FH2 and WH2 domain containing (INF2), transcript variant 1, mRNA [NM_022489]	105185589	chr14	105185512	+	FALSE	hs|14q32.33	64423	NM_022489	inverted formin, FH2 and WH2 domain containing	chr14:105185512-105185589	GO:0048471|GO:0005737|GO:0030036|GO:0005783|GO:0005488|GO:0017048|GO:0005634|GO:0003779|GO:0016043	NM_022489	Hs.24956
A_23_P122924	1.59e-05	10.7298	up	9.13323	12.5568	INHBA	Homo sapiens inhibin, beta A (INHBA), mRNA [NM_002192]	41729305	chr7	41729246	-	FALSE	hs|7p14.1	3624	NM_002192	inhibin, beta A	chr7:41729305-41729246	GO:0005515|GO:0042541|GO:0030308|GO:0042701|GO:0030154|GO:0042802|GO:0071397|GO:0045077|GO:0001942|GO:0046982|GO:0046882|GO:0006952|GO:0046881|GO:0046880|GO:0045786|GO:0032925|GO:0005125|GO:0045650|GO:0005179|GO:0045648|GO:0045893|GO:0040007|GO:0008083|GO:0060279|GO:0045578|GO:0008285|GO:0007267|GO:0071372|GO:0000082|GO:0001541|GO:0002244|GO:0045944|GO:0061029|GO:0042476|GO:0060021|GO:0007050|GO:…	NM_002192	Hs.583348
A_23_P153964	0.00632075	3.05047	up	8.96751	10.5765	INHBB	Homo sapiens inhibin, beta B (INHBB), mRNA [NM_002193]	121108839	chr2	121108780	+	FALSE	hs|2q14.2	3625	NM_002193	inhibin, beta B	chr2:121108780-121108839	GO:0005515|GO:0048471|GO:0048599|GO:0030154|GO:0042803|GO:0001541|GO:0071397|GO:0044320|GO:0045444|GO:0046676|GO:0009267|GO:0032869|GO:0046882|GO:0006952|GO:0005576|GO:0042981|GO:0046881|GO:0032924|GO:0005125|GO:0009605|GO:0005179|GO:0046789|GO:0048178|GO:0040007|GO:0008083|GO:0060279	NM_002193	Hs.1735
A_32_P44453	0.00486835	2.53691	down	10.1006	8.75755	INPP1	Homo sapiens inositol polyphosphate-1-phosphatase (INPP1), transcript variant 2, mRNA [NM_002194]	191233830	chr2	191231564	+	FALSE	hs|2q32.2	3628	NM_002194	inositol polyphosphate-1-phosphatase	chr2:191231564-191233830	GO:0007165|GO:0016787|GO:0004437|GO:0006796|GO:0046872|GO:0004441	NM_002194	Hs.32309
A_23_P168130	0.00524004	2.72977	down	7.06769	5.61891	IP6K3	Homo sapiens inositol hexakisphosphate kinase 3 (IP6K3), transcript variant 1, mRNA [NM_054111]	33689810	chr6	33689751	-	FALSE	hs|6p21.31	117283	NM_054111	inositol hexakisphosphate kinase 3	chr6:33689810-33689751	GO:0008440|GO:0046488|GO:0005634|GO:0000831|GO:0000832|GO:0005524|GO:0005737|GO:0000166|GO:0032958|GO:0016301|GO:0006468|GO:0004428|GO:0016740	NM_054111	Hs.17253
A_33_P3314794	0.000327	4.96589	up	5.71017	8.02223	IQCA1	Homo sapiens IQ motif containing with AAA domain 1 (IQCA1), mRNA [NM_024726]	237240062	chr2	237240003	-	FALSE	hs|2q37.2	79781	NM_024726	IQ motif containing with AAA domain 1	chr2:237240062-237240003	GO:0000166|GO:0005524	NM_024726	Hs.591594
A_23_P41765	0.00118337	2.05667	up	8.62702	9.66733	IRF1	Homo sapiens interferon regulatory factor 1 (IRF1), mRNA [NM_002198]	131819501	chr5	131819442	-	FALSE	hs|5q31.1	3659	NM_002198	interferon regulatory factor 1	chr5:131819501-131819442	GO:0003700|GO:0009408|GO:0006366|GO:0071300|GO:0019221|GO:0007249|GO:0005634|GO:0060337|GO:0071359|GO:0045944|GO:0071356|GO:0071375|GO:0010942|GO:0060333|GO:0000975|GO:0007565|GO:0060416|GO:0042512|GO:0043565|GO:0045084|GO:0043374|GO:0007596|GO:0071347|GO:0005654|GO:0071260	NM_002198	Hs.436061
A_23_P110837	0.00211318	3.09555	up	11.6189	13.2491	IRX4	Homo sapiens iroquois homeobox 4 (IRX4), mRNA [NM_016358]	1877555	chr5	1877533	-	FALSE	hs|5p15.33	50805	NM_016358	iroquois homeobox 4	chr5:1877555-1877533	GO:0043565|GO:0007507|GO:0003700|GO:0005634|GO:0048561	NM_016358	Hs.196927
A_23_P819	0.00162369	5.86618	up	11.9894	14.5418	ISG15	Homo sapiens ISG15 ubiquitin-like modifier (ISG15), mRNA [NM_005101]	949626	chr1	949567	+	FALSE	hs|1p36.33	9636	NM_005101	ISG15 ubiquitin-like modifier	chr1:949567-949626	GO:0005515|GO:0032020|GO:0019221|GO:0007267|GO:0005576|GO:0009615|GO:0005615|GO:0005829|GO:0005737|GO:0060337|GO:0019941|GO:0044419|GO:0031386|GO:0032480	NM_005101	Hs.458485
A_23_P3312	0.000394	2.83385	up	11.5371	13.0399	ISLR	Homo sapiens immunoglobulin superfamily containing leucine-rich repeat (ISLR), transcript variant 1, mRNA [NM_005545]	74469180	chr15	74469121	+	FALSE	hs|15q24.1	3671	NM_005545	immunoglobulin superfamily containing leucine-rich repeat	chr15:74469121-74469180	GO:0005576|GO:0007155	NM_005545	Hs.699822
A_23_P210176	0.00306228	3.11447	up	10.898	12.537	ITGA6	Homo sapiens integrin, alpha 6 (ITGA6), transcript variant 2, mRNA [NM_000210]	173370615	chr2	173370556	+	FALSE	hs|2q31.1	3655	NM_000210	integrin, alpha 6	chr2:173370556-173370615	GO:0005515|GO:0008305|GO:0043066|GO:0043065|GO:0005886|GO:0034329|GO:0050900|GO:0007229|GO:0007596|GO:0045944|GO:0031581|GO:0007044|GO:0004872|GO:0016021|GO:0007155|GO:0042327	NM_000210	Hs.133397
A_23_P50907	3.02e-05	2.56888	up	11.4731	12.8343	ITGAV	Homo sapiens integrin, alpha V (vitronectin receptor, alpha polypeptide, antigen CD51) (ITGAV), transcript variant 1, mRNA [NM_002210]	187545354	chr2	187545295	+	FALSE	hs|2q32.1	3685	NM_002210	integrin, alpha V (vitronectin receptor, alpha polypeptide, antigen CD51)	chr2:187545295-187545354	GO:0005515|GO:0008284|GO:0005886|GO:0035635|GO:0097024|GO:0031994|GO:0050900|GO:0046718|GO:0050764|GO:0007411|GO:0044419|GO:0052066|GO:0004872|GO:0070371|GO:0007155|GO:0008305|GO:0050431|GO:0043066|GO:0001568|GO:0009986|GO:0010745|GO:0001846|GO:0045715|GO:2000425|GO:0001525|GO:0050748|GO:0010888|GO:0045785|GO:0007160|GO:0016020|GO:0007596|GO:0007229|GO:0005887|GO:0032369|GO:0009897	NM_002210	Hs.436873
A_33_P3377364	0.00639104	2.07653	up	12.0787	13.1329	ITGB4	Homo sapiens integrin, beta 4 (ITGB4), transcript variant 1, mRNA [NM_000213]	73753883	chr17	73753824	+	FALSE	hs|17q25.1	3691	NM_000213	integrin, beta 4	chr17:73753824-73753883	GO:0005515|GO:0030056|GO:0008305|GO:0030054|GO:0005886|GO:0009986|GO:0034329|GO:0009611|GO:0007275|GO:0007154|GO:0007160|GO:0007229|GO:0048870|GO:0031581|GO:0046847|GO:0004872|GO:0016021|GO:0007155|GO:0031252	NM_000213	Hs.632226
A_23_P18223	0.000637	2.28155	down	6.12443	4.93442	ITIH1	Homo sapiens inter-alpha (globulin) inhibitor H1 (ITIH1), transcript variant 1, mRNA [NM_002215]	52825938	chr3	52825879	+	FALSE	hs|3p21.1	3697	NM_002215	inter-alpha (globulin) inhibitor H1	chr3:52825879-52825938	GO:0045321|GO:0004867|GO:0005509|GO:0030212|GO:0005576|GO:0030414	NM_002215	Hs.420257
A_24_P202567	0.00297791	2.2374	down	13.1464	11.9846	ITPKC	Homo sapiens inositol-trisphosphate 3-kinase C (ITPKC), mRNA [NM_025194]	41246672	chr19	41246613	+	FALSE	hs|19q13.2	80271	NM_025194	inositol-trisphosphate 3-kinase C	chr19:41246613-41246672	GO:0005516|GO:0008440|GO:0005737|GO:0000166|GO:0016301|GO:0005634|GO:0005524|GO:0016740	NM_025194	Hs.515415
A_33_P3298128	0.00671089	2.25156	down	8.77395	7.60302	ITPR2	Homo sapiens inositol 1,4,5-trisphosphate receptor, type 2 (ITPR2), mRNA [NM_002223]	26488383	chr12	26488324	-	FALSE	hs|12p12.1	3709	NM_002223	inositol 1,4,5-trisphosphate receptor, type 2	chr12:26488383-26488324	GO:0001666|GO:0048011|GO:0005262|GO:0005220|GO:0005783|GO:0048016|GO:0015085|GO:0033017|GO:0030168|GO:0007202|GO:0055085|GO:0007165|GO:0006112|GO:0050796|GO:0016020|GO:0007596|GO:0070588|GO:0006810|GO:0001950|GO:0016021|GO:0031095|GO:0005216|GO:0006811	NM_002223	Hs.512235
A_32_P110472	0.00628314	3.6959	down	7.29812	5.41219	IYD	Homo sapiens iodotyrosine deiodinase (IYD), transcript variant 2, mRNA [NM_203395]	150725363	chr6	150725304	+	FALSE	hs|6q25.1	389434	NM_203395	iodotyrosine deiodinase	chr6:150725304-150725363	GO:0034641|GO:0005886|GO:0004447|GO:0016491|GO:0042446|GO:0016021	NM_203395	Hs.310225
A_23_P397320	0.00899974	5.03878	up	4.70057	7.03364	JSRP1	Homo sapiens junctional sarcoplasmic reticulum protein 1 (JSRP1), mRNA [NM_144616]	2252615	chr19	2252556	-	FALSE	hs|19p13.3	126306	NM_144616	junctional sarcoplasmic reticulum protein 1	chr19:2252615-2252556	GO:0016020|GO:0033017	NM_144616	Hs.712901
A_23_P429950	0.00760479	2.3133	up	7.33167	8.54162	KAL1	Homo sapiens Kallmann syndrome 1 sequence (KAL1), mRNA [NM_000216]	8497292	chrX	8497233	-	FALSE	hs|Xp22.31	3730	NM_000216	Kallmann syndrome 1 sequence	chrX:8497292-8497233	GO:0006935|GO:0005886|GO:0007411|GO:0004867|GO:0005578|GO:0006928|GO:0005576|GO:0030414|GO:0007155|GO:0008201|GO:0005615|GO:0005201	NM_000216	Hs.521869
A_32_P51237	0.00341564	8.33931	up	4.12216	7.18209	KANK4	Homo sapiens KN motif and ankyrin repeat domains 4 (KANK4), mRNA [NM_181712]	62703325	chr1	62703266	-	FALSE	hs|1p31.3	163782	NM_181712	KN motif and ankyrin repeat domains 4	chr1:62703325-62703266	NA	NM_181712	Hs.283398
A_32_P159651	0.000266	3.4439	down	11.1224	9.33836	KAT2B	Homo sapiens K(lysine) acetyltransferase 2B (KAT2B), mRNA [NM_003884]	20195578	chr3	20195519	+	FALSE	hs|3p24.3	8850	NM_003884	K(lysine) acetyltransferase 2B	chr3:20195519-20195578	GO:0005515|GO:0010467|GO:0008285|GO:0042826|GO:0042641|GO:0045736|GO:0006361|GO:0006360|GO:0005634|GO:0018076|GO:0004468|GO:0000125|GO:0045944|GO:0044419|GO:0016585|GO:0006338|GO:0007050|GO:0004402|GO:0006473|GO:0003712|GO:0032869|GO:0019901|GO:0003713|GO:0018394|GO:0007049|GO:0043966|GO:0008152|GO:0004861|GO:0005671|GO:0000776|GO:0005654|GO:0016407|GO:0031672|GO:0016740|GO:0031674|GO:0008134	NM_003884	Hs.533055
A_24_P331830	0.00760776	2.85736	down	7.93447	6.41979	KAZN	Homo sapiens kazrin, periplakin interacting protein (KAZN), transcript variant A, mRNA [NM_015209]	15361305	chr1	15361246	+	FALSE	hs|1p36.21	23254	NM_015209	kazrin, periplakin interacting protein	chr1:15361246-15361305	GO:0030057|GO:0005737|GO:0030054|GO:0031424|GO:0005634|GO:0001533	NM_015209	Hs.368823
A_23_P417173	0.00565741	2.57083	down	6.87189	5.50965	KCNA5	Homo sapiens potassium voltage-gated channel, shaker-related subfamily, member 5 (KCNA5), mRNA [NM_002234]	5155732	chr12	5155673	+	FALSE	hs|12p13.32	3741	NM_002234	potassium voltage-gated channel, shaker-related subfamily, member 5	chr12:5155673-5155732	GO:0005251|GO:0001666|GO:0005244|GO:0005794|GO:0005886|GO:0051481|GO:0055075|GO:0005102|GO:0043267|GO:0055085|GO:0051259|GO:0015271|GO:0008076|GO:0019870|GO:0016021|GO:0006813|GO:0006811	NM_002234	Hs.150208
A_24_P182929	0.00192359	3.59724	down	6.269	4.42211	KCNAB1	Homo sapiens potassium voltage-gated channel, shaker-related subfamily, beta member 1 (KCNAB1), transcript variant 2, mRNA [NM_003471]	156255906	chr3	156255847	+	FALSE	hs|3q25.31	7881	NM_003471	potassium voltage-gated channel, shaker-related subfamily, beta member 1	chr3:156255847-156255906	GO:0005737|GO:0005244|GO:0005249|GO:0015459|GO:0016021|GO:0055085|GO:0006813|GO:0006811	NM_003471	Hs.654519
A_23_P259251	0.000453	4.59602	up	4.75552	6.9559	KCND2	Homo sapiens potassium voltage-gated channel, Shal-related subfamily, member 2 (KCND2), mRNA [NM_012281]	120390210	chr7	120390151	+	FALSE	hs|7q31.31	3751	NM_012281	potassium voltage-gated channel, Shal-related subfamily, member 2	chr7:120390151-120390210	GO:0005515|GO:0005250|GO:0005244|GO:0046982|GO:0005886|GO:0009986|GO:0007268|GO:0014069|GO:0042995|GO:0055085|GO:0051291|GO:0046872|GO:0043197|GO:0005249|GO:0008076|GO:0043025|GO:0001508|GO:0019717|GO:0006813|GO:0006811	NM_012281	Hs.654739
A_23_P109026	0.00784797	3.7571	down	12.9351	11.0255	KCNK15	Homo sapiens potassium channel, subfamily K, member 15 (KCNK15), mRNA [NM_022358]	43379652	chr20	43379593	+	FALSE	hs|20q13.12	60598	NM_022358	potassium channel, subfamily K, member 15	chr20:43379593-43379652	GO:0005244|GO:0016020|GO:0005267|GO:0016021|GO:0006813|GO:0006811	NM_022358	Hs.528664
A_23_P50591	0.00946779	2.4722	down	9.50236	8.19656	KCNK6	Homo sapiens potassium channel, subfamily K, member 6 (KCNK6), mRNA [NM_004823]	38818876	chr19	38818817	+	FALSE	hs|19q13.2	9424	NM_004823	potassium channel, subfamily K, member 6	chr19:38818817-38818876	GO:0005242|GO:0005244|GO:0016020|GO:0008076|GO:0005267|GO:0016021|GO:0006813|GO:0006811	NM_004823	Hs.240395
A_33_P3213797	0.00164787	6.16723	down	10.2249	7.60029	KCNK7	Homo sapiens potassium channel, subfamily K, member 7 (KCNK7), transcript variant C, mRNA [NM_005714]	65360607	chr11	65360548	-	FALSE	hs|11q13.1	10089	NM_005714	potassium channel, subfamily K, member 7	chr11:65360607-65360548	GO:0005244|GO:0016020|GO:0005267|GO:0016021|GO:0006813|GO:0071805|GO:0006811	NM_005714	Hs.175218
A_23_P120103	0.00693944	2.84218	up	9.02917	10.5362	KCNS3	Homo sapiens potassium voltage-gated channel, delayed-rectifier, subfamily S, member 3 (KCNS3), mRNA [NM_002252]	18114171	chr2	18114112	+	FALSE	hs|2p24.2	3790	NM_002252	potassium voltage-gated channel, delayed-rectifier, subfamily S, member 3	chr2:18114112-18114171	GO:0005251|GO:0005244|GO:0005794|GO:0005886|GO:0015459|GO:0055085|GO:0043231|GO:0005737|GO:0006112|GO:0050796|GO:0005249|GO:0008076|GO:0016021|GO:0006813|GO:0006811	NM_002252	Hs.414489
A_23_P211504	0.00029	2.87464	up	7.46657	8.98996	KDELR3	Homo sapiens KDEL (Lys-Asp-Glu-Leu) endoplasmic reticulum protein retention receptor 3 (KDELR3), transcript variant 2, mRNA [NM_016657]	38877463	chr22	38877404	+	FALSE	hs|22q13.1	11015	NM_016657	KDEL (Lys-Asp-Glu-Leu) endoplasmic reticulum protein retention receptor 3	chr22:38877404-38877463	GO:0046923|GO:0016020|GO:0005783|GO:0005789|GO:0004872|GO:0016021|GO:0006621|GO:0016192|GO:0015031	NM_016657	Hs.730819
A_23_P324754	0.00970366	5.66228	up	6.72294	9.22432	KIAA1199	Homo sapiens KIAA1199 (KIAA1199), mRNA [NM_018689]	81243693	chr15	81243634	+	FALSE	hs|15q25.1	57214	NM_018689	KIAA1199	chr15:81243634-81243693	NA	NM_018689	Hs.459088
A_23_P99853	0.000588	2.3491	down	12.0776	10.8455	KIAA1370	Homo sapiens KIAA1370 (KIAA1370), mRNA [NM_019600]	52874158	chr15	52874099	-	FALSE	hs|15q21.2	56204	NM_019600	KIAA1370	chr15:52874158-52874099	NA	NM_019600	Hs.152385
A_32_P61857	0.000575	2.52937	down	9.93793	8.59915	KIAA1468	Homo sapiens KIAA1468 (KIAA1468), mRNA [NM_020854]	59973933	chr18	59973874	+	FALSE	hs|18q21.33	57614	NM_020854	KIAA1468	chr18:59973874-59973933	GO:0005488	NM_020854	Hs.465323
A_24_P265265	0.00786884	3.5546	up	3.12935	4.95904	KIAA1804	Mitogen-activated protein kinase kinase kinase MLK4 [Source:UniProtKB/Swiss-Prot;Acc:Q5TCX8] [ENST00000366623]	233509746	chr1	233509687	+	FALSE	hs|1q42.2	84451	AJ311797	mixed lineage kinase 4	chr1:233509687-233509746	GO:0046777|GO:0000166|GO:0004674|GO:0006468|GO:0007257|GO:0005575|GO:0004713|GO:0005524|GO:0004709|GO:0042803	NA	Hs.547779
A_33_P3230548	0.00821675	3.25724	up	8.07124	9.77489	KIF14	Homo sapiens kinesin family member 14 (KIF14), mRNA [NM_014875]	200521383	chr1	200521324	-	FALSE	hs|1q32.1	9928	NM_014875	kinesin family member 14	chr1:200521383-200521324	GO:0005515|GO:0005737|GO:0000166|GO:0005874|GO:0005819|GO:0005634|GO:0005856|GO:0003777|GO:0005524|GO:0007018	NM_014875	Hs.3104
A_23_P48835	0.00908446	2.40618	up	9.68841	10.9552	KIF23	Homo sapiens kinesin family member 23 (KIF23), transcript variant 1, mRNA [NM_138555]	69740583	chr15	69740524	+	FALSE	hs|15q23	9493	NM_138555	kinesin family member 23	chr15:69740524-69740583	GO:0005515|GO:0005871|GO:0000022|GO:0005874|GO:0005819|GO:0030496|GO:0005634|GO:0003777|GO:0005524|GO:0005829|GO:0000910|GO:0007067|GO:0005737|GO:0000166|GO:0007596|GO:0000087|GO:0005654|GO:0005856|GO:0000278|GO:0007018	NM_138555	Hs.270845
A_33_P3382565	0.000565	3.00167	up	5.2909	6.87667	KIF26B	Homo sapiens kinesin family member 26B (KIF26B), mRNA [NM_018012]	245865901	chr1	245865842	+	FALSE	hs|1q44	55083	NM_018012	kinesin family member 26B	chr1:245865842-245865901	GO:0072092|GO:0005737|GO:0022409|GO:0000166|GO:0005874|GO:0030010|GO:0005856|GO:0003777|GO:0005524|GO:0007018	NM_018012	Hs.368096
A_24_P5890	0.00379885	2.41452	up	3.58936	4.86109	KIR2DL5A	Homo sapiens killer cell immunoglobulin-like receptor, two domains, long cytoplasmic tail, 5A (KIR2DL5A), mRNA [NM_020535]	94763	chr19_gl000209_random	91939	+	FALSE	NA	57292	NM_020535	killer cell immunoglobulin-like receptor, two domains, long cytoplasmic tail, 5A	chr19_gl000209_random:91939-94763	GO:0005886|GO:0004872|GO:0016021	NM_020535	Hs.676464
A_23_P350617	0.00484433	5.34181	down	5.89805	3.48072	KLB	Homo sapiens klotho beta (KLB), mRNA [NM_175737]	39450181	chr4	39450122	+	FALSE	hs|4p14	152831	NM_175737	klotho beta	chr4:39450122-39450181	GO:0005886|GO:0043169|GO:0017134|GO:0005975|GO:0016021|GO:0003824|GO:0004553	NM_175737	Hs.90756
A_23_P217528	0.0027657	4.21879	down	11.6389	9.56211	KLF8	Homo sapiens Kruppel-like factor 8 (KLF8), transcript variant 1, mRNA [NM_007250]	56311498	chrX	56311439	+	FALSE	hs|Xp11.21	11279	NM_007250	Kruppel-like factor 8	chrX:56311439-56311498	GO:0005622|GO:0006355|GO:0008270|GO:0005634|GO:0003677|GO:0046872	NM_007250	Hs.646614
A_23_P27128	0.00192238	6.8556	down	7.55337	4.77609	KLHL10	Homo sapiens kelch-like 10 (Drosophila) (KLHL10), mRNA [NM_152467]	40004206	chr17	40003625	+	FALSE	hs|17q21.2	317719	NM_152467	kelch-like 10 (Drosophila)	chr17:40003625-40004206	GO:0009566|GO:0000902|GO:0005737|GO:0048873|GO:0007286|GO:0048808|GO:0008584	NM_152467	Hs.127510
A_24_P416645	0.00633343	28.3672	down	13.3175	8.49131	KLK13	Homo sapiens kallikrein-related peptidase 13 (KLK13), mRNA [NM_015596]	51561909	chr19	51561850	-	FALSE	hs|19q13.41	26085	NM_015596	kallikrein-related peptidase 13	chr19:51561909-51561850	GO:0005515|GO:0005737|GO:0016787|GO:0004252|GO:0016485|GO:0006508|GO:0008233|GO:0005576|GO:0030141|GO:0003824|GO:0005615	NM_015596	Hs.165296
A_33_P3251065	0.00536131	4.71049	down	5.31503	3.07915	KLK13	kallikrein-related peptidase 13 [Source:HGNC Symbol;Acc:6361] [ENST00000441527]	51567053	chr19	51566994	-	FALSE	hs|19q13.41	26085	AY923173	kallikrein-related peptidase 13	chr19:51567053-51566994	GO:0005515|GO:0005737|GO:0016787|GO:0004252|GO:0016485|GO:0006508|GO:0008233|GO:0005576|GO:0030141|GO:0003824|GO:0005615	NA	Hs.165296
A_23_P204208	0.00744468	2.33358	up	5.17823	6.40078	KLRD1	Homo sapiens killer cell lectin-like receptor subfamily D, member 1 (KLRD1), transcript variant 1, mRNA [NM_002262]	10467354	chr12	10467295	+	FALSE	hs|12p13.2	3824	NM_002262	killer cell lectin-like receptor subfamily D, member 1	chr12:10467295-10467354	GO:0005886|GO:0005488|GO:0050776|GO:0005529|GO:0016021|GO:0007166|GO:0004888	NM_002262	Hs.562457
A_33_P3274501	0.00389276	2.71344	down	5.01873	3.5786	KLRF1	Homo sapiens killer cell lectin-like receptor subfamily F, member 1 (KLRF1), mRNA [NM_016523]	9985009	chr12	9984950	+	FALSE	hs|12p13.31	51348	NM_016523	killer cell lectin-like receptor subfamily F, member 1	chr12:9984950-9985009	GO:0016020|GO:0005887|GO:0005488|GO:0005529|GO:0007166|GO:0032393|GO:0004888	NM_016523	Hs.183125
A_24_P228149	0.00855964	24.1931	down	17.4461	12.8496	KRT13	Homo sapiens keratin 13 (KRT13), transcript variant 2, mRNA [NM_002274]	39661309	chr17	39659920	-	FALSE	hs|17q21.2	3860	NM_002274	keratin 13	chr17:39661309-39659920	GO:0009314|GO:0005882|GO:0008544|GO:0071300|GO:0005198|GO:0043587	NM_002274	Hs.654550
A_33_P3306307	0.000668	13.7731	down	10.3552	6.57144	KRT26	Homo sapiens keratin 26 (KRT26), mRNA [NM_181539]	38922574	chr17	38922515	-	FALSE	hs|17q21.2	353288	NM_181539	keratin 26	chr17:38922574-38922515	GO:0005882|GO:0005198	NM_181539	Hs.592133
A_33_P3296687	0.00274239	3.04682	down	8.34781	6.7405	KRT33A	Homo sapiens keratin 33A (KRT33A), mRNA [NM_004138]	39502430	chr17	39502371	-	FALSE	hs|17q21.2	3883	NM_004138	keratin 33A	chr17:39502430-39502371	GO:0005882|GO:0005515|GO:0005198	NM_004138	Hs.512579
A_23_P2674	0.00421904	84.3522	down	17.9305	11.5321	KRT4	Homo sapiens keratin 4 (KRT4), mRNA [NM_002272]	53200570	chr12	53200511	-	FALSE	hs|12q13.13	3851	NM_002272	keratin 4	chr12:53200570-53200511	GO:0005882|GO:0005198|GO:0030855|GO:0007010|GO:0050680|GO:0045095	NM_002272	Hs.654610
A_33_P3315268	0.001601	13.8922	down	14.7172	10.921	KRT78	Homo sapiens keratin 78 (KRT78), mRNA [NM_173352]	53232819	chr12	53232760	-	FALSE	hs|12q13.13	196374	NM_173352	keratin 78	chr12:53232819-53232760	GO:0005515|GO:0005198|GO:0045095	NM_173352	Hs.665267
A_23_P14072	0.001537	2.2429	up	10.3628	11.5282	KRT8	Homo sapiens keratin 8 (KRT8), mRNA [NM_002273]	53291085	chr12	53291026	-	FALSE	hs|12q13.13	3856	NM_002273	keratin 8	chr12:53291085-53291026	GO:0005882|GO:0005515|GO:0005737|GO:0005198|GO:0044419|GO:0007010|GO:0005654|GO:0005634|GO:0045095|GO:0016363	NM_002273	Hs.533782
A_33_P3273552	0.00149638	10.2464	down	14.2769	10.9198	KRT83	Homo sapiens keratin 83 (KRT83), mRNA [NM_002282]	52709761	chr12	52709702	-	FALSE	hs|12q13.13	3889	NM_002282	keratin 83	chr12:52709761-52709702	GO:0008544|GO:0005198|GO:0045095	NM_002282	Hs.720768
A_33_P3772937	0.000596	3.23248	up	7.61481	9.30745	KRT8P12	Homo sapiens mRNA; cDNA DKFZp434C107 (from clone DKFZp434C107) [AL133645]	160287062	chr3	160287003	+	FALSE	hs|3q25.33	90133	AL133645	keratin 8 pseudogene 12	chr3:160287003-160287062	NA	NA	Hs.595594
A_33_P3293768	0.00428809	4.24214	down	9.29752	7.21273	KRTAP10-6	Homo sapiens keratin associated protein 10-6 (KRTAP10-6), mRNA [NM_198688]	46011208	chr21	46011149	-	FALSE	hs|21q22.3	386674	NM_198688	keratin associated protein 10-6	chr21:46011208-46011149	GO:0045095	NM_198688	Hs.689666
A_24_P367242	0.0055223	2.99546	down	9.19247	7.60969	KRTAP19-1	Homo sapiens keratin associated protein 19-1 (KRTAP19-1), mRNA [NM_181607]	31852472	chr21	31852413	-	FALSE	hs|21q22.11	337882	NM_181607	keratin associated protein 19-1	chr21:31852472-31852413	GO:0005882	NM_181607	Hs.61552
A_33_P3317937	0.00166443	7.68787	down	11.7449	8.80232	KRTAP20-1	Homo sapiens keratin associated protein 20-1 (KRTAP20-1), mRNA [NM_181615]	31988833	chr21	31988774	+	FALSE	hs|21q22.11	337975	NM_181615	keratin associated protein 20-1	chr21:31988774-31988833	GO:0005882	NM_181615	Hs.553697
A_24_P325146	0.00183777	4.38525	down	5.53754	3.40488	KRTAP4-8	Homo sapiens keratin associated protein 4-8 (KRTAP4-8), mRNA [NM_031960]	39253472	chr17	39253413	-	FALSE	hs|17q21.2	728224	NM_031960	keratin associated protein 4-8	chr17:39253472-39253413	GO:0045095	NM_031960	Hs.307019
A_32_P313405	0.00811877	6.69573	up	6.86521	9.60845	LAMA1	Homo sapiens laminin, alpha 1 (LAMA1), mRNA [NM_005559]	6942035	chr18	6941976	-	FALSE	hs|18p11.31	284217	NM_005559	laminin, alpha 1	chr18:6942035-6941976	GO:0030334|GO:0005102|GO:0005578|GO:0005606|GO:0005576|GO:0005608|GO:0005615|GO:0030155|GO:0005604|GO:0045995|GO:0007411|GO:0007166|GO:0005201	NM_005559	Hs.270364
A_23_P89780	0.00731196	2.66928	up	10.5983	12.0148	LAMA3	Homo sapiens laminin, alpha 3 (LAMA3), transcript variant 1, mRNA [NM_198129]	21534794	chr18	21534735	+	FALSE	hs|18q11.2	3909	NM_198129	laminin, alpha 3	chr18:21534735-21534794	GO:0030334|GO:0034329|GO:0005102|GO:0005606|GO:0005576|GO:0030155|GO:0005604|GO:0031012|GO:0045995|GO:0005610|GO:0008544|GO:0005198|GO:0031581	NM_198129	Hs.436367
A_23_P94030	0.00148284	2.34957	up	12.3665	13.5989	LAMB1	Homo sapiens laminin, beta 1 (LAMB1), mRNA [NM_002291]	107564470	chr7	107564411	-	FALSE	hs|7q31.1	3912	NM_002291	laminin, beta 1	chr7:107564470-107564411	GO:0050679|GO:0048471|GO:0030335|GO:0007566|GO:0005606|GO:0005576|GO:0005607|GO:0005615|GO:0031175|GO:0005604|GO:0043259|GO:0005178|GO:0043257|GO:0043208|GO:0005198|GO:0007411|GO:0042476|GO:0034446|GO:0007155|GO:0019899|GO:0005201	NM_002291	Hs.650585
A_33_P3338121	1.68e-05	3.86384	up	12.814	14.764	LAMB3	Homo sapiens laminin, beta 3 (LAMB3), transcript variant 2, mRNA [NM_001017402]	209788415	chr1	209788356	-	FALSE	hs|1q32.2	3914	NM_001017402	laminin, beta 3	chr1:209788415-209788356	GO:0005515|GO:0008544|GO:0005198|GO:0034329|GO:0031581|GO:0005576|GO:0007155|GO:0032403|GO:0005604	NM_001017402	Hs.497636
A_23_P201636	0.000199	5.43995	up	11.3219	13.7655	LAMC2	Homo sapiens laminin, gamma 2 (LAMC2), transcript variant 1, mRNA [NM_005562]	183213669	chr1	183213610	+	FALSE	hs|1q25.3	3918	NM_005562	laminin, gamma 2	chr1:183213610-183213669	GO:0048471|GO:0034329|GO:0005624|GO:0005576|GO:0005607|GO:0005625|GO:0005615|GO:0005604|GO:0008544|GO:0031581|GO:0007155|GO:0005938|GO:0008201	NM_005562	Hs.591484
A_23_P160968	0.000556	9.12762	up	6.753	9.94324	LAMC2	Homo sapiens laminin, gamma 2 (LAMC2), transcript variant 2, mRNA [NM_018891]	183209453	chr1	183209301	+	FALSE	hs|1q25.3	3918	NM_018891	laminin, gamma 2	chr1:183209301-183209453	GO:0048471|GO:0034329|GO:0005624|GO:0005576|GO:0005607|GO:0005625|GO:0005615|GO:0005604|GO:0008544|GO:0031581|GO:0007155|GO:0005938|GO:0008201	NM_018891	Hs.591484
A_24_P180680	0.00655636	2.59849	up	11.9438	13.3214	LAPTM4B	Homo sapiens lysosomal protein transmembrane 4 beta (LAPTM4B), mRNA [NM_018407]	98864640	chr8	98864581	+	FALSE	hs|8q22.1	55353	NM_018407	lysosomal protein transmembrane 4 beta	chr8:98864581-98864640	GO:0005515|GO:0016020|GO:0006810|GO:0016021|GO:0012505	NM_018407	Hs.492314
A_33_P3237977	0.00064	4.41638	up	8.0435	10.1864	LARP6	Homo sapiens La ribonucleoprotein domain family, member 6 (LARP6), transcript variant 2, mRNA [NM_197958]	71143871	chr15	71143812	-	FALSE	hs|15q23	55323	NM_197958	La ribonucleoprotein domain family, member 6	chr15:71143871-71143812	GO:0006396|GO:0005737|GO:0005794|GO:0000166|GO:0030529|GO:0003723|GO:0005730|GO:0005634|GO:0003676|GO:0043231	NM_197958	Hs.416755
A_33_P3364268	0.00185798	3.19002	up	6.32806	8.00163	LBH	Homo sapiens limb bud and heart development homolog (mouse) (LBH), mRNA [NM_030915]	30480625	chr2	30480566	+	FALSE	hs|2p23.1	81606	NM_030915	limb bud and heart development homolog (mouse)	chr2:30480566-30480625	GO:0005737|GO:0006357|GO:0005730|GO:0007275|GO:0005634|GO:0043231	NM_030915	Hs.567598
A_23_P54918	0.00171521	3.5924	down	9.64579	7.80084	LDHD	Homo sapiens lactate dehydrogenase D (LDHD), nuclear gene encoding mitochondrial protein, transcript variant 1, mRNA [NM_153486]	75145886	chr16	75145827	-	FALSE	hs|16q23.1	197257	NM_153486	lactate dehydrogenase D	chr16:75145886-75145827	GO:0005739|GO:0005515|GO:0004458|GO:0008762|GO:0050660|GO:0005743|GO:0016614	NM_153486	Hs.380929
A_23_P63038	0.000545	2.28962	up	9.39189	10.587	LEPRE1	Homo sapiens leucine proline-enriched proteoglycan (leprecan) 1 (LEPRE1), transcript variant 1, mRNA [NM_022356]	43212247	chr1	43212188	-	FALSE	hs|1p34.2	64175	NM_022356	leucine proline-enriched proteoglycan (leprecan) 1	chr1:43212247-43212188	GO:0031418|GO:0008285|GO:0005506|GO:0005783|GO:0005578|GO:0005576|GO:0005634|GO:0005575|GO:0046872|GO:0003674|GO:0005737|GO:0019797|GO:0005488|GO:0016706|GO:0016049|GO:0016702	NM_022356	Hs.720014
A_33_P3257030	3.77e-06	3.87926	up	9.7003	11.6561	LEPREL4	Homo sapiens leprecan-like 4 (LEPREL4), mRNA [NM_006455]	39958266	chr17	39958207	-	FALSE	hs|17q21.2	10609	NM_006455	leprecan-like 4	chr17:39958266-39958207	GO:0000794|GO:0000795|GO:0005694|GO:0005488|GO:0005730|GO:0005634|GO:0007130	NM_006455	Hs.446459
A_23_P166459	0.000104	3.09807	up	13.7902	15.4216	LGALS1	Homo sapiens lectin, galactoside-binding, soluble, 1 (LGALS1), mRNA [NM_002305]	38075711	chr22	38075652	+	FALSE	hs|22q13.1	3956	NM_002305	lectin, galactoside-binding, soluble, 1	chr22:38075652-38075711	GO:0005515|GO:0034120|GO:0010812|GO:0016936|GO:0005634|GO:0048678|GO:0005615|GO:0042803|GO:0005622|GO:0005737|GO:0001948|GO:0045445|GO:0004871|GO:0071333|GO:0043123|GO:0030395|GO:0009986|GO:0042493|GO:0005578|GO:0005529|GO:0006915|GO:0005576|GO:0042981|GO:0033555|GO:0031012|GO:0007165|GO:0071407|GO:0043236|GO:0010977	NM_002305	Hs.445351
A_23_P254917	0.00138163	2.02574	down	6.16009	5.14164	LGALS4	Homo sapiens lectin, galactoside-binding, soluble, 4 (LGALS4), mRNA [NM_006149]	39292983	chr19	39292766	-	FALSE	hs|19q13.2	3960	NM_006149	lectin, galactoside-binding, soluble, 4	chr19:39292983-39292766	GO:0005886|GO:0005529|GO:0007155|GO:0005829	NM_006149	Hs.5302
A_23_P127267	0.000759	7.1374	down	6.39061	3.55521	LGI1	Homo sapiens leucine-rich, glioma inactivated 1 (LGI1), mRNA [NM_005097]	95557595	chr10	95557536	+	FALSE	hs|10q23.33	9211	NM_005097	leucine-rich, glioma inactivated 1	chr10:95557536-95557595	GO:0005515|GO:0030054|GO:0008283|GO:0030307|GO:0005102|GO:0045202|GO:0005576|GO:0005615|GO:0031175|GO:0007399|GO:0007411|GO:0050806|GO:0051260	NM_005097	Hs.533670
A_23_P255104	0.00246005	2.54395	up	9.80576	11.1528	LHFPL2	Homo sapiens lipoma HMGIC fusion partner-like 2 (LHFPL2), mRNA [NM_005779]	77781354	chr5	77781295	-	FALSE	hs|5q14.1	10184	NM_005779	lipoma HMGIC fusion partner-like 2	chr5:77781354-77781295	GO:0016020|GO:0016021	NM_005779	Hs.79299
A_24_P355493	0.00160843	2.14025	down	8.18997	7.0922	LHPP	Homo sapiens phospholysine phosphohistidine inorganic pyrophosphate phosphatase (LHPP), transcript variant 1, mRNA [NM_022126]	126185549	chr10	126177105	+	FALSE	hs|10q26.13	64077	NM_022126	phospholysine phosphohistidine inorganic pyrophosphate phosphatase	chr10:126177105-126185549	GO:0008969|GO:0006470|GO:0000287|GO:0016787|GO:0004427|GO:0005634|GO:0006796|GO:0042803|GO:0005829	NM_022126	Hs.527748
A_23_P84219	0.00884572	3.29404	down	10.3401	8.6202	LIPH	Homo sapiens lipase, member H (LIPH), mRNA [NM_139248]	185225760	chr3	185225701	-	FALSE	hs|3q27.2	200879	NM_139248	lipase, member H	chr3:185225760-185225701	GO:0016042|GO:0016787|GO:0005886|GO:0005576|GO:0004620|GO:0008201|GO:0005615	NM_139248	Hs.68864
A_33_P3280796	0.000672	3.69734	up	2.78309	4.66958	LMO7	Homo sapiens cDNA FLJ34733 fis, clone MESAN2006953, highly similar to LIM domain only 7 isoform c. [AK092052]	76210624	chr13	76210565	+	FALSE	hs|13q22.2	4008	AK092052	LIM domain 7	chr13:76210565-76210624	GO:0005737|GO:0004842|GO:0016567|GO:0000151|GO:0008270|GO:0005634|GO:0046872	NA	Hs.207631
A_33_P3280801	0.00323187	4.86801	down	11.2488	8.96544	LMO7	Homo sapiens LIM domain 7 (LMO7), transcript variant 1, mRNA [NM_005358]	76430743	chr13	76430684	+	FALSE	hs|13q22.2	4008	NM_005358	LIM domain 7	chr13:76430684-76430743	GO:0005737|GO:0004842|GO:0016567|GO:0000151|GO:0008270|GO:0005634|GO:0046872	NM_005358	Hs.207631
A_33_P3280805	0.0041044	4.47964	down	8.57011	6.40673	LMO7	Homo sapiens LIM domain 7 (LMO7), transcript variant 2, mRNA [NM_015842]	76423370	chr13	76423311	+	FALSE	hs|13q22.2	4008	NM_015842	LIM domain 7	chr13:76423311-76423370	GO:0005737|GO:0004842|GO:0016567|GO:0000151|GO:0008270|GO:0005634|GO:0046872	NM_015842	Hs.207631
A_23_P213137	0.00775812	5.54718	down	9.48639	7.01463	LNX1	Homo sapiens ligand of numb-protein X 1 (LNX1), transcript variant 2, mRNA [NM_032622]	54327621	chr4	54327170	-	FALSE	hs|4q12	84708	NM_032622	ligand of numb-protein X 1	chr4:54327621-54327170	GO:0005515|GO:0005737|GO:0004842|GO:0042787|GO:0016874|GO:0051260|GO:0008270|GO:0030165|GO:0046872	NM_032622	Hs.518760
A_33_P3348924	0.00726028	4.03881	down	6.38696	4.37303	LOC100128348	Homo sapiens cDNA FLJ46249 fis, clone TESTI4021377. [AK128128]	33346963	chr16	33346904	-	FALSE	hs|16p11.2	100128348	AK128128	hypothetical protein LOC100128348	chr16:33346963-33346904	NA	NA	Hs.637572
A_33_P3307049	0.00061	14.1713	down	11.505	7.6801	LOC100129363	Homo sapiens cDNA FLJ46623 fis, clone TLUNG2001810. [AK128478]	89196484	chr15	89196425	+	FALSE	hs|15q26.1	100129363	AK128478	hypothetical protein LOC100129363	chr15:89196425-89196484	NA	NA	Hs.679166
A_33_P3377190	0.000247	13.0528	down	7.50694	3.80065	LOC100131662	Homo sapiens cDNA FLJ45218 fis, clone BRCAN2019653. [AK127156]	95690749	chr2	95690690	-	FALSE	hs|2q11.1	100131662	AK127156	hypothetical LOC100131662	chr2:95690749-95690690	NA	NA	Hs.585935
A_33_P3560679	0.00187047	8.90609	up	4.00354	7.15833	LOC100287221	Homo sapiens hypothetical protein LOC651721, mRNA (cDNA clone IMAGE:4430430), partial cds. [BC026225]	88211069	chr16	88211010	-	FALSE	hs|16q24.2	100287221	BC026225	hypothetical LOC100287221	chr16:88211069-88211010	NA	NA	Hs.598754
A_33_P3495783	0.00439103	4.57491	down	5.95769	3.76395	LOC157503	Homo sapiens cDNA FLJ44919 fis, clone BRAMY3010902. [AK126867]	56454503	chr8	56454444	+	FALSE	hs|8q12.1	157503	AK126867	hypothetical protein LOC157503	chr8:56454444-56454503	NA	NA	Hs.103535
A_33_P3436935	0.000272	4.0599	up	2.82867	4.85012	LOC284930	Homo sapiens cDNA FLJ35788 fis, clone TESTI2005683. [AK093107]	48251341	chr22	48251282	+	FALSE	hs|22q13.31	284930	AK093107	hypothetical protein LOC284930	chr22:48251282-48251341	NA	NA	Hs.407567
A_33_P3305855	0.00198582	2.13215	down	6.98352	5.89121	LOC645967	full-length cDNA clone CS0DI040YO17 of Placenta Cot 25-normalized of Homo sapiens (human). [CR590502]	150039978	chr6	150039919	+	FALSE	hs|6q25.1	645967	CR590502	hypothetical LOC645967	chr6:150039919-150039978	NA	NA	Hs.604079
A_33_P3353520	0.00235609	3.16711	down	8.48278	6.81961	LOC646862	Homo sapiens hypothetical protein LOC646862 (LOC646862), mRNA [NM_001195135]	58908446	chr19	58908387	+	FALSE	hs|19q13.43	646862	NM_001195135	hypothetical protein LOC646862	chr19:58908387-58908446	NA	NM_001195135	Hs.728121
A_33_P3284858	0.00157798	3.78064	down	6.80315	4.88452	LOC729867	Homo sapiens cDNA FLJ35980 fis, clone TESTI2013546. [AK093299]	160172052	chr1	160171993	-	FALSE	hs|1q23.2	729867	AK093299	hypothetical LOC729867	chr1:160172052-160171993	NA	NA	Hs.674191
A_23_P122216	0.00131575	2.86395	up	7.6884	9.20641	LOX	Homo sapiens lysyl oxidase (LOX), transcript variant 1, mRNA [NM_002317]	121405845	chr5	121405786	-	FALSE	hs|5q23.2	4015	NM_002317	lysyl oxidase	chr5:121405845-121405786	GO:0005581|GO:0001568|GO:0005507|GO:0030324|GO:0004720|GO:0042493|GO:0005576|GO:0005634|GO:0048545|GO:0005615|GO:0046872|GO:0030199|GO:0042060|GO:0016491|GO:0006464|GO:0048251	NM_002317	Hs.102267
A_33_P3354464	0.000184	2.03376	up	9.40885	10.433	LOXL1	Homo sapiens lysyl oxidase-like 1 (LOXL1), mRNA [NM_005576]	74241914	chr15	74241855	+	FALSE	hs|15q24.1	4016	NM_005576	lysyl oxidase-like 1	chr15:74241855-74241914	GO:0031012|GO:0016641|GO:0005507|GO:0016491|GO:0005576|GO:0018277|GO:0005615|GO:0046872|GO:0055114	NM_005576	Hs.65436
A_23_P111995	0.000535	5.39019	up	9.16929	11.5996	LOXL2	Homo sapiens lysyl oxidase-like 2 (LOXL2), mRNA [NM_002318]	23154845	chr8	23154786	-	FALSE	hs|8p21.3	4017	NM_002318	lysyl oxidase-like 2	chr8:23154845-23154786	GO:0016641|GO:0016020|GO:0005507|GO:0007568|GO:0016491|GO:0009055|GO:0005576|GO:0007155|GO:0005615|GO:0046872|GO:0006464|GO:0005044	NM_002318	Hs.626637
A_24_P88763	0.00998901	2.13389	up	9.1687	10.2622	LOXL3	Homo sapiens lysyl oxidase-like 3 (LOXL3), mRNA [NM_032603]	74760422	chr2	74760363	-	FALSE	hs|2p13.1	84695	NM_032603	lysyl oxidase-like 3	chr2:74760422-74760363	GO:0008150|GO:0016641|GO:0016020|GO:0005507|GO:0004720|GO:0016491|GO:0005576|GO:0005615|GO:0046872|GO:0055114|GO:0005044	NM_032603	Hs.727659
A_24_P406754	0.00924596	2.80341	up	6.96279	8.44997	LOXL4	Homo sapiens lysyl oxidase-like 4 (LOXL4), mRNA [NM_032211]	100007805	chr10	100007746	-	FALSE	hs|10q24.2	84171	NM_032211	lysyl oxidase-like 4	chr10:100007805-100007746	GO:0005515|GO:0016641|GO:0016020|GO:0005507|GO:0016491|GO:0005576|GO:0005615|GO:0046872|GO:0005044	NM_032211	Hs.306814
A_23_P204375	0.00158172	2.36053	down	8.52998	7.29087	LPAR5	Homo sapiens lysophosphatidic acid receptor 5 (LPAR5), transcript variant 1, mRNA [NM_020400]	6728794	chr12	6728735	-	FALSE	hs|12p13.31	57121	NM_020400	lysophosphatidic acid receptor 5	chr12:6728794-6728735	GO:0008150|GO:0003674|GO:0016020|GO:0005886|GO:0045028|GO:0004930|GO:0004872|GO:0016021|GO:0005575	NM_020400	Hs.155538
A_23_P2705	0.00428365	2.05631	down	11.0149	9.97484	LPAR6	Homo sapiens lysophosphatidic acid receptor 6 (LPAR6), transcript variant 1, mRNA [NM_005767]	48985730	chr13	48985671	-	FALSE	hs|13q14.2	10161	NM_005767	lysophosphatidic acid receptor 6	chr13:48985730-48985671	GO:0007186|GO:0005886|GO:0045028|GO:0004930|GO:0004872|GO:0016021	NM_005767	Hs.123464
A_33_P3356070	0.000212	4.84048	down	6.38946	4.11431	LPIN1	Homo sapiens lipin 1 (LPIN1), mRNA [NM_145693]	11964937	chr2	11964878	+	FALSE	hs|2p25.1	23175	NM_145693	lipin 1	chr2:11964878-11964937	GO:0042826|GO:0005783|GO:0045598|GO:0031100|GO:0005741|GO:0005634|GO:0042975|GO:0031529|GO:0005829|GO:0009062|GO:0003674|GO:0005737|GO:0045944|GO:0001085|GO:0019432|GO:0044255|GO:0005667|GO:0006355|GO:0032869|GO:0000266|GO:0031532|GO:0003713|GO:0000122|GO:0008195|GO:0016020|GO:0016787|GO:0031065|GO:0005789|GO:0006642	NM_145693	Hs.467740
A_23_P146233	0.000608	5.8518	up	6.41651	8.96539	LPL	Homo sapiens lipoprotein lipase (LPL), mRNA [NM_000237]	19824246	chr8	19824187	+	FALSE	hs|8p21.3	4023	NM_000237	lipoprotein lipase	chr8:19824187-19824246	GO:0006629|GO:0005515|GO:0004806|GO:0005886|GO:0042627|GO:0070328|GO:0031225|GO:0005615|GO:0034361|GO:0019432|GO:0006633|GO:0019433|GO:0008201|GO:0010744|GO:0042493|GO:0005102|GO:0005576|GO:0004620|GO:0010886|GO:0004465|GO:0016042|GO:0031012|GO:0034372|GO:0034371|GO:0016787|GO:0010890|GO:0042157|GO:0006641|GO:0006644|GO:0017129	NM_000237	Hs.180878
A_32_P82111	0.00840928	2.94316	down	7.24234	5.68498	LRFN2	Homo sapiens leucine rich repeat and fibronectin type III domain containing 2 (LRFN2), mRNA [NM_020737]	40359466	chr6	40359407	-	FALSE	hs|6p21.2	57497	NM_020737	leucine rich repeat and fibronectin type III domain containing 2	chr6:40359466-40359407	GO:0030054|GO:0005886|GO:0045211|GO:0045202|GO:0016021	NM_020737	Hs.250015
A_24_P99216	0.000704	2.2851	down	9.97653	8.78427	LRP10	Homo sapiens low density lipoprotein receptor-related protein 10 (LRP10), mRNA [NM_014045]	23346165	chr14	23345985	+	FALSE	hs|14q11.2	26020	NM_014045	low density lipoprotein receptor-related protein 10	chr14:23345985-23346165	GO:0005905|GO:0016020|GO:0004872|GO:0016021|GO:0006897	NM_014045	Hs.525232
A_23_P8906	0.00560995	2.75004	up	7.85873	9.31818	LRP12	Homo sapiens low density lipoprotein receptor-related protein 12 (LRP12), transcript variant 1, mRNA [NM_013437]	105502522	chr8	105502463	-	FALSE	hs|8q22.3	29967	NM_013437	low density lipoprotein receptor-related protein 12	chr8:105502522-105502463	GO:0005515|GO:0005041|GO:0007165|GO:0005905|GO:0016020|GO:0005887|GO:0004872|GO:0016021|GO:0040008|GO:0006897	NM_013437	Hs.600630
A_33_P3286208	0.00985172	2.07946	up	5.87378	6.92999	LRR1	Homo sapiens leucine rich repeat protein 1 (LRR1), transcript variant 3, mRNA [NM_203467]	50065759	chr14	50065700	+	FALSE	hs|14q21.3	122769	NM_203467	leucine rich repeat protein 1	chr14:50065700-50065759	NA	NM_203467	Hs.451090
A_33_P3329522	0.00812263	2.2218	up	5.58866	6.74039	LRRC17	Homo sapiens leucine rich repeat containing 17 (LRRC17), transcript variant 1, mRNA [NM_001031692]	102580031	chr7	102579972	+	FALSE	hs|7q22.1	10234	NM_001031692	leucine rich repeat containing 17	chr7:102579972-102580031	GO:0033687|GO:0045671|GO:0005576|GO:0048539|GO:0005615|GO:0001649	NM_001031692	Hs.567412
A_23_P253958	0.00827821	2.81648	up	7.12601	8.6199	LRRC17	Homo sapiens leucine rich repeat containing 17 (LRRC17), transcript variant 2, mRNA [NM_005824]	102584885	chr7	102584826	+	FALSE	hs|7q22.1	10234	NM_005824	leucine rich repeat containing 17	chr7:102584826-102584885	GO:0033687|GO:0045671|GO:0005576|GO:0048539|GO:0005615|GO:0001649	NM_005824	Hs.567412
A_23_P103775	0.0041324	2.26832	up	7.10628	8.28791	LRRC8C	Homo sapiens leucine rich repeat containing 8 family, member C (LRRC8C), mRNA [NM_032270]	90180383	chr1	90180324	+	FALSE	hs|1p22.2	84230	NM_032270	leucine rich repeat containing 8 family, member C	chr1:90180324-90180383	GO:0016020|GO:0005783|GO:0005789|GO:0016021	NM_032270	Hs.412836
A_23_P97365	0.00125317	2.30463	up	9.04466	10.2492	LRRC8D	Homo sapiens leucine rich repeat containing 8 family, member D (LRRC8D), transcript variant 2, mRNA [NM_018103]	90401156	chr1	90401097	+	FALSE	hs|1p22.2	55144	NM_018103	leucine rich repeat containing 8 family, member D	chr1:90401097-90401156	GO:0005515|GO:0016020|GO:0016021	NM_018103	Hs.482087
A_33_P3281930	0.00023	2.56986	down	11.6741	10.3125	LRRFIP2	Homo sapiens leucine rich repeat (in FLII) interacting protein 2 (LRRFIP2), transcript variant 1, mRNA [NM_006309]	37095273	chr3	37095214	-	FALSE	hs|3p22.2	9209	NM_006309	leucine rich repeat (in FLII) interacting protein 2	chr3:37095273-37095214	GO:0005515|GO:0008150|GO:0030275|GO:0005575|GO:0016055	NM_006309	Hs.730738
A_23_P211806	0.0010043	2.24488	down	11.4187	10.252	LRRFIP2	Homo sapiens leucine rich repeat (in FLII) interacting protein 2 (LRRFIP2), transcript variant 2, mRNA [NM_017724]	37094855	chr3	37094796	-	FALSE	hs|3p22.2	9209	NM_017724	leucine rich repeat (in FLII) interacting protein 2	chr3:37094855-37094796	GO:0005515|GO:0008150|GO:0030275|GO:0005575|GO:0016055	NM_017724	Hs.730738
A_33_P3369058	0.00748363	2.27478	down	8.43113	7.2454	LRRK2	Homo sapiens leucine-rich repeat kinase 2 (LRRK2), mRNA [NM_198578]	40762806	chr12	40762747	+	FALSE	hs|12q12	120892	NM_198578	leucine-rich repeat kinase 2	chr12:40762747-40762806	GO:0005515|GO:0005802|GO:0005886|GO:0007264|GO:0032436|GO:0003924|GO:0035564|GO:0008340|GO:0042803|GO:0007406|GO:0022028|GO:0005622|GO:0040012|GO:0043068|GO:0000186|GO:0005737|GO:0046777|GO:0021772|GO:0018105|GO:0015631|GO:0000166|GO:0000165|GO:0007528|GO:0042391|GO:0031398|GO:2000173|GO:0061002|GO:0060161|GO:0006979|GO:0010942|GO:0035640|GO:0004708|GO:0048312|GO:0014043|GO:0005624|GO:0005525|GO:…	NM_198578	Hs.187636
A_23_P131330	0.00600378	2.93529	down	6.08778	4.53428	LRRTM1	Homo sapiens leucine rich repeat transmembrane neuronal 1 (LRRTM1), mRNA [NM_178839]	80529291	chr2	80529232	-	FALSE	hs|2p12	347730	NM_178839	leucine rich repeat transmembrane neuronal 1	chr2:80529291-80529232	GO:0030424|GO:0008150|GO:0003674|GO:0016020|GO:0009986|GO:0005783|GO:0005789|GO:0016021|GO:0030426	NM_178839	Hs.591580
A_23_P388670	0.00042	2.35737	down	13.9	12.6629	LTA4H	Homo sapiens leukotriene A4 hydrolase (LTA4H), mRNA [NM_000895]	96394826	chr12	96394767	-	FALSE	hs|12q23.1	4048	NM_000895	leukotriene A4 hydrolase	chr12:96394826-96394767	GO:0005515|GO:0019370|GO:0005730|GO:0043434|GO:0005634|GO:0004463|GO:0006692|GO:0010043|GO:0046872|GO:0060509|GO:0005829|GO:0005737|GO:0006954|GO:0005488|GO:0004177|GO:0006508|GO:0042446|GO:0008270|GO:0008233|GO:0043171|GO:0008237|GO:0004301	NM_000895	Hs.524648
A_23_P43810	0.00847868	2.35889	up	9.28889	10.527	LTBP1	Homo sapiens latent transforming growth factor beta binding protein 1 (LTBP1), transcript variant 1, mRNA [NM_206943]	33623895	chr2	33623836	+	FALSE	hs|2p22.3	4052	NM_206943	latent transforming growth factor beta binding protein 1	chr2:33623836-33623895	GO:0031012|GO:0008150|GO:0035583|GO:0019838|GO:0005488|GO:0005509|GO:0005578|GO:0005024|GO:0005576	NM_206943	Hs.619315
A_23_P99063	0.000407	2.57007	up	12.4331	13.7949	LUM	Homo sapiens lumican (LUM), mRNA [NM_002345]	91497705	chr12	91497646	-	FALSE	hs|12q21.33	4060	NM_002345	lumican	chr12:91497705-91497646	GO:0031012|GO:0014070|GO:0051216|GO:0030199|GO:0005518|GO:0005578|GO:0005576|GO:0070848|GO:0005583|GO:0007601|GO:0005615|GO:0005201	NM_002345	Hs.406475
A_24_P317762	0.00404325	2.41374	up	10.6118	11.8831	LY6E	Homo sapiens lymphocyte antigen 6 complex, locus E (LY6E), transcript variant 1, mRNA [NM_002346]	144103007	chr8	144102816	+	FALSE	hs|8q24.3	4061	NM_002346	lymphocyte antigen 6 complex, locus E	chr8:144102816-144103007	GO:0042415|GO:0055010|GO:0030325|GO:0005886|GO:0035265|GO:0005887|GO:0031225|GO:0001701|GO:0007166|GO:0048242	NM_002346	Hs.521903
A_23_P165707	0.00923225	2.05987	up	6.48938	7.53194	LYG1	Homo sapiens lysozyme G-like 1 (LYG1), mRNA [NM_174898]	99900843	chr2	99900784	-	FALSE	hs|2q11.2	129530	NM_174898	lysozyme G-like 1	chr2:99900843-99900784	GO:0009253|GO:0016998|GO:0016798|GO:0008152|GO:0003796|GO:0005576	NM_174898	Hs.164589
A_33_P3418175	0.00384039	10.9355	down	12.4471	8.99614	LYNX1	Homo sapiens Ly6/neurotoxin 1 (LYNX1), transcript variant 1, mRNA [NM_023946]	143846151	chr8	143846092	-	FALSE	hs|8q24.3	66004	NM_023946	Ly6/neurotoxin 1	chr8:143846151-143846092	GO:0005886|GO:0005576|GO:0031225	NM_023946	Hs.158665
A_23_P94186	0.000599	14.8561	down	10.6929	6.79991	LYPD2	Homo sapiens LY6/PLAUR domain containing 2 (LYPD2), mRNA [NM_205545]	143832477	chr8	143831850	-	FALSE	hs|8q24.3	137797	NM_205545	LY6/PLAUR domain containing 2	chr8:143832477-143831850	GO:0005886|GO:0031225	NM_205545	Hs.441280
A_23_P343366	0.00687685	2.43809	down	8.87523	7.58948	MAB21L3	Homo sapiens mab-21-like 3 (C. elegans) (MAB21L3), mRNA [NM_152367]	116676814	chr1	116676755	+	FALSE	hs|1p13.1	126868	NM_152367	mab-21-like 3 (C. elegans)	chr1:116676755-116676814	NA	NM_152367	Hs.376194
A_32_P131031	0.00162697	5.23773	down	9.42558	7.03664	MACC1	Homo sapiens metastasis associated in colon cancer 1 (MACC1), mRNA [NM_182762]	20193868	chr7	20180775	-	FALSE	hs|7p21.1	346389	NM_182762	metastasis associated in colon cancer 1	chr7:20193868-20180775	GO:0005515|GO:0006355|GO:0005737|GO:0005886|GO:0005730|GO:0051781|GO:0005634|GO:0008083	NM_182762	Hs.598388
A_23_P153616	0.006721	5.63622	down	8.26428	5.76956	MADCAM1	Homo sapiens mucosal vascular addressin cell adhesion molecule 1 (MADCAM1), transcript variant 1, mRNA [NM_130760]	505251	chr19	505192	+	FALSE	hs|19p13.3	8174	NM_130760	mucosal vascular addressin cell adhesion molecule 1	chr19:505192-505251	GO:0007165|GO:0006955|GO:0016020|GO:0005886|GO:0050776|GO:0007568|GO:0002687|GO:0005624|GO:0016021|GO:0009790|GO:0007155	NM_130760	Hs.102598
A_33_P3342375	0.00923141	145.686	up	4.98152	12.1682	MAGEA6	Homo sapiens melanoma antigen family A, 6 (MAGEA6), transcript variant 2, mRNA [NM_175868]	151870804	chrX	151870745	+	FALSE	hs|Xq28	4105	NM_175868	melanoma antigen family A, 6	chrX:151870745-151870804	GO:0005515|GO:0008150|GO:0003674|GO:0005575	NM_175868	Hs.441113
A_23_P159907	0.00123523	3.43822	up	8.21429	9.99596	MAGED4B	Homo sapiens melanoma antigen family D, 4B (MAGED4B), transcript variant 1, mRNA [NM_030801]	51934627	chrX	51934568	+	FALSE	hs|Xp11.22	81557	NM_030801	melanoma antigen family D, 4B	chrX:51934568-51934627	NA	NM_030801	Hs.522650
A_24_P75220	0.000782	2.00268	down	6.46497	5.46304	MAGI1	Homo sapiens membrane associated guanylate kinase, WW and PDZ domain containing 1 (MAGI1), transcript variant 2, mRNA [NM_004742]	65346980	chr3	65346921	-	FALSE	hs|3p14.1	9223	NM_004742	membrane associated guanylate kinase, WW and PDZ domain containing 1	chr3:65346980-65346921	GO:0005515|GO:0006461|GO:0005886|GO:0000166|GO:0005911|GO:0005923|GO:0008022|GO:0007155|GO:0005524|GO:0007166	NM_004742	Hs.651939
A_33_P3369520	0.0027093	2.88569	down	10.629	9.1001	MAGI3	Homo sapiens membrane associated guanylate kinase, WW and PDZ domain containing 3 (MAGI3), transcript variant 2, mRNA [NM_152900]	114228464	chr1	114228405	+	FALSE	hs|1p13.2	260425	NM_152900	membrane associated guanylate kinase, WW and PDZ domain containing 3	chr1:114228405-114228464	GO:0005515|GO:0030054|GO:0005886|GO:0004385|GO:0006915|GO:0005634|GO:0005524|GO:0005622|GO:0035556|GO:0000166|GO:0016020|GO:0044419|GO:0005923	NM_152900	Hs.486189
A_23_P17134	0.00783208	53.1173	down	17.7757	12.0446	MAL	Homo sapiens mal, T-cell differentiation protein (MAL), transcript variant a, mRNA [NM_002371]	95719654	chr2	95719595	+	FALSE	hs|2q11.1	4118	NM_002371	mal, T-cell differentiation protein	chr2:95719595-95719654	GO:0005783|GO:0042552|GO:0045176|GO:0006917|GO:0007417|GO:0030154|GO:0008289|GO:0016505|GO:0016324|GO:0016020|GO:0005887|GO:0045121|GO:0019911|GO:0001766|GO:0016021|GO:0000300|GO:0005768|GO:0015267	NM_002371	Hs.80395
A_23_P60130	0.00199944	2.80998	down	14.1852	12.6946	MAL2	Homo sapiens mal, T-cell differentiation protein 2 (gene/pseudogene) (MAL2), mRNA [NM_052886]	120257616	chr8	120257557	+	FALSE	hs|8q24.12	114569	NM_052886	mal, T-cell differentiation protein 2 (gene/pseudogene)	chr8:120257557-120257616	GO:0005515|GO:0048471|GO:0016324|GO:0005737|GO:0005886|GO:0016021|GO:0012505	NM_052886	Hs.201083
A_24_P80204	0.00761738	4.00594	down	14.6156	12.6135	MALL	Homo sapiens mal, T-cell differentiation protein-like (MALL), mRNA [NM_005434]	110841931	chr2	110841872	-	FALSE	hs|2q13	7851	NM_005434	mal, T-cell differentiation protein-like	chr2:110841931-110841872	GO:0042632|GO:0005515|GO:0005886|GO:0000139|GO:0030136|GO:0016023|GO:0045121|GO:0016021	NM_005434	Hs.185055
A_23_P162211	0.00213511	2.36033	down	9.79496	8.55598	MANSC1	Homo sapiens MANSC domain containing 1 (MANSC1), mRNA [NM_018050]	12483006	chr12	12482947	-	FALSE	hs|12p13.2	54682	NM_018050	MANSC domain containing 1	chr12:12483006-12482947	GO:0016020|GO:0016021	NM_018050	Hs.591145
A_33_P3368139	3.14e-05	2.0126	down	12.5849	11.5759	MAP3K1	Homo sapiens mitogen-activated protein kinase kinase kinase 1 (MAP3K1), mRNA [NM_005921]	56191809	chr5	56191750	+	FALSE	hs|5q11.2	4214	NM_005921	mitogen-activated protein kinase kinase kinase 1	chr5:56191750-56191809	GO:0005515|GO:0004842|GO:0034142|GO:0051259|GO:0046872|GO:0042802|GO:0005829|GO:0004706|GO:0005737|GO:0046777|GO:0008637|GO:0042787|GO:0030838|GO:0018105|GO:0000166|GO:0002755|GO:0032232|GO:0043010|GO:0007179|GO:0005856|GO:0008432|GO:0004709|GO:0051019|GO:0030334|GO:0000209|GO:0034130|GO:0043065|GO:0046625|GO:0019901|GO:0034134|GO:0031434|GO:0005624|GO:0006970|GO:0007256|GO:0007257|GO:0002224|GO:…	NM_005921	Hs.653654
A_24_P406132	0.00495942	2.06983	down	12.0617	11.0122	MAPK13	Homo sapiens mitogen-activated protein kinase 13 (MAPK13), mRNA [NM_002754]	36107374	chr6	36107315	+	FALSE	hs|6p21.31	5603	NM_002754	mitogen-activated protein kinase 13	chr6:36107315-36107374	GO:0005515|GO:0032755|GO:0048011|GO:0006950|GO:0005625|GO:0007265|GO:0005524|GO:0007243|GO:0007049|GO:0004672|GO:0000166|GO:0004674|GO:0050729|GO:0004707	NM_002754	Hs.178695
A_23_P37910	0.00483088	2.05748	down	9.4575	8.41662	MAPK3	Homo sapiens mitogen-activated protein kinase 3 (MAPK3), transcript variant 1, mRNA [NM_002746]	30128296	chr16	30128237	-	FALSE	hs|16p11.2	5595	NM_002746	mitogen-activated protein kinase 3	chr16:30128296-30128237	GO:0005515|GO:0019369|GO:0051216|GO:0006361|GO:0006360|GO:0051403|GO:0002756|GO:0000166|GO:0007173|GO:0000165|GO:0007411|GO:0016301|GO:0044419|GO:0002755|GO:0032496|GO:0009887|GO:0031663|GO:0004707|GO:0034130|GO:0019902|GO:0034134|GO:0009636|GO:0030168|GO:0002224|GO:0016310|GO:0043234|GO:0007049|GO:0045087|GO:0005654|GO:0001784|GO:0008286|GO:0034142|GO:0007264|GO:0005634|GO:0007265|GO:0035066|GO:…	NM_002746	Hs.861
A_23_P502078	0.00368819	2.28329	down	9.06421	7.87309	MAPK8IP2	Homo sapiens mitogen-activated protein kinase 8 interacting protein 2 (MAPK8IP2), transcript variant 1, mRNA [NM_012324]	51049559	chr22	51049500	+	FALSE	hs|22q13.33	23542	NM_012324	mitogen-activated protein kinase 8 interacting protein 2	chr22:51049500-51049559	GO:0010469|GO:2000311|GO:2000310|GO:0032874|GO:0032403|GO:0046328|GO:0005737|GO:0007172|GO:0001540|GO:0000165|GO:0001662|GO:0051966|GO:0019901|GO:0060079|GO:0014069|GO:0030295|GO:0045768|GO:0043234|GO:0048813|GO:0005198|GO:0035176|GO:0001934|GO:0019894|GO:0005078|GO:0046958	NM_012324	Hs.558180
A_23_P310	0.00219111	4.43375	up	7.88081	10.0293	MARCKSL1	Homo sapiens MARCKS-like 1 (MARCKSL1), mRNA [NM_023009]	32800015	chr1	32799956	-	FALSE	hs|1p35.1	65108	NM_023009	MARCKS-like 1	chr1:32800015-32799956	GO:0005516|GO:0008284|GO:0005886|GO:0016192	NM_023009	Hs.75061
A_23_P110571	0.000563	2.09713	down	12.3506	11.2822	MAST4	Homo sapiens microtubule associated serine/threonine kinase family member 4 (MAST4), transcript variant 3, mRNA [NM_001164664]	66462867	chr5	66462808	+	FALSE	hs|5q12.3	375449	NM_001164664	microtubule associated serine/threonine kinase family member 4	chr5:66462808-66462867	GO:0005737|GO:0000287|GO:0000166|GO:0004674|GO:0005524	NM_001164664	Hs.595458
A_33_P3420466	0.000597	3.72893	up	3.68024	5.57899	MATN3	Homo sapiens matrilin 3 (MATN3), mRNA [NM_002381]	20194120	chr2	20194061	-	FALSE	hs|2p24.1	4148	NM_002381	matrilin 3	chr2:20194120-20194061	GO:0005515|GO:0001501|GO:0005578|GO:0005576|GO:0005201	NM_002381	Hs.656199
A_32_P1173	0.00287306	2.44563	up	8.5239	9.81411	MB21D1	Homo sapiens Mab-21 domain containing 1 (MB21D1), mRNA [NM_138441]	74138526	chr6	74138467	-	FALSE	hs|6q13	115004	NM_138441	Mab-21 domain containing 1	chr6:74138526-74138467	NA	NM_138441	Hs.658405
A_32_P103633	0.00899006	3.46662	up	9.93665	11.7302	MCM2	Homo sapiens minichromosome maintenance complex component 2 (MCM2), mRNA [NM_004526]	127340864	chr3	127340805	+	FALSE	hs|3q21.3	4171	NM_004526	minichromosome maintenance complex component 2	chr3:127340805-127340864	GO:0005515|GO:0042555|GO:0004386|GO:0000216|GO:0005634|GO:0003677|GO:0005524|GO:0046872|GO:0006260|GO:0000084|GO:0007049|GO:0006271|GO:0000082|GO:0016787|GO:0000166|GO:0006270|GO:0000075|GO:0005654|GO:0000278|GO:0000785	NM_004526	Hs.477481
A_23_P68547	0.00410627	2.6536	up	8.55823	9.96618	MCM8	Homo sapiens minichromosome maintenance complex component 8 (MCM8), transcript variant 2, mRNA [NM_182802]	5975123	chr20	5975064	+	FALSE	hs|20p12.3	84515	NM_182802	minichromosome maintenance complex component 8	chr20:5975064-5975123	GO:0017111|GO:0006355|GO:0000216|GO:0005634|GO:0003677|GO:0005524|GO:0000084|GO:0006260|GO:0000082|GO:0006271|GO:0000166|GO:0000075|GO:0005654|GO:0000278	NM_182802	Hs.597484
A_23_P116235	0.00680808	3.50413	up	11.6524	13.4615	MDK	Homo sapiens midkine (neurite growth-promoting factor 2) (MDK), transcript variant 1, mRNA [NM_001012334]	46405290	chr11	46405231	+	FALSE	hs|11p11.2	4192	NM_001012334	midkine (neurite growth-promoting factor 2)	chr11:46405231-46405290	GO:0021542|GO:0030421|GO:0021987|GO:0030325|GO:0007614|GO:0009611|GO:0005576|GO:0007275|GO:0030154|GO:0007399|GO:0007165|GO:0050795|GO:0021681|GO:0051781|GO:0001662|GO:0043526|GO:0008083|GO:0008201	NM_001012334	Hs.82045
A_32_P129894	0.00568412	2.34563	down	9.48014	8.25017	MEGF9	Homo sapiens multiple EGF-like-domains 9 (MEGF9), mRNA [NM_001080497]	123363867	chr9	123363808	-	FALSE	hs|9q33.2	1955	NM_001080497	multiple EGF-like-domains 9	chr9:123363867-123363808	GO:0008150|GO:0016020|GO:0005488|GO:0005509|GO:0016021|GO:0005575	NM_001080497	Hs.494977
A_23_P1029	1.05e-05	6.53253	up	7.2157	9.92334	MFAP2	Homo sapiens microfibrillar-associated protein 2 (MFAP2), transcript variant 1, mRNA [NM_017459]	17302197	chr1	17302138	-	FALSE	hs|1p36.13	4237	NM_017459	microfibrillar-associated protein 2	chr1:17302197-17302138	GO:0005578|GO:0001527|GO:0005576|GO:0001968|GO:0070051|GO:0030220	NM_017459	Hs.389137
A_33_P3281795	0.00461052	4.23051	down	13.1841	11.1032	MGLL	Homo sapiens monoglyceride lipase (MGLL), transcript variant 1, mRNA [NM_007283]	127407970	chr3	127407911	-	FALSE	hs|3q21.3	11343	NM_007283	monoglyceride lipase	chr3:127407970-127407911	GO:0004091|GO:0006629|GO:0019369|GO:0005886|GO:0050727|GO:0045202|GO:0030168|GO:0060292|GO:0009966|GO:2000124|GO:0042803|GO:0008289|GO:0016042|GO:0006954|GO:0016787|GO:0007596|GO:0004622|GO:0047372|GO:0006633|GO:0019433|GO:0046464|GO:0051930	NM_007283	Hs.277035
A_23_P110167	0.00619435	2.31491	down	13.4469	12.2359	MGST2	Homo sapiens microsomal glutathione S-transferase 2 (MGST2), transcript variant 1, mRNA [NM_002413]	140625315	chr4	140625256	+	FALSE	hs|4q31.1	4258	NM_002413	microsomal glutathione S-transferase 2	chr4:140625256-140625315	GO:0019370|GO:0005792|GO:0031965|GO:0006805|GO:0005886|GO:0005783|GO:0010243|GO:0005624|GO:0004364|GO:0004464|GO:0004602|GO:0005737|GO:0002540|GO:0006750|GO:0032496|GO:0005789|GO:0016021|GO:0008047|GO:0016740	NM_002413	Hs.81874
A_33_P3278407	0.00316673	2.48242	down	12.2595	10.9478	MLLT4	Homo sapiens myeloid/lymphoid or mixed-lineage leukemia (trithorax homolog, Drosophila); translocated to, 4 (MLLT4), transcript variant 1, mRNA [NM_001207008]	168265420	chr6	168265361	+	FALSE	hs|6q27	4301	NM_001207008	myeloid/lymphoid or mixed-lineage leukemia (trithorax homolog, Drosophila); translocated to, 4	chr6:168265361-168265420	GO:0005515|GO:0030054|GO:0005886|GO:0034329|GO:0005730|GO:0007267|GO:0005634|GO:0008022|GO:0045216|GO:0005829|GO:0007165|GO:0005912|GO:0005911|GO:0007155|GO:0034332	NM_001207008	Hs.614974
A_33_P3370094	0.00119825	2.8927	up	5.98413	7.51655	MME	Homo sapiens membrane metallo-endopeptidase (MME), transcript variant 2b, mRNA [NM_007289]	154898275	chr3	154898216	+	FALSE	hs|3q25.2	4311	NM_007289	membrane metallo-endopeptidase	chr3:154898216-154898275	GO:0005515|GO:0044306|GO:0042277|GO:0030424|GO:0005886|GO:0007267|GO:0045202|GO:0005624|GO:0050435|GO:0046872|GO:0030425|GO:0008021|GO:0005887|GO:0006508|GO:0008233|GO:0004222|GO:0008237|GO:0006518	NM_007289	Hs.307734
A_23_P1691	0.00121066	142.465	up	7.56205	14.7165	MMP1	Homo sapiens matrix metallopeptidase 1 (interstitial collagenase) (MMP1), transcript variant 1, mRNA [NM_002421]	102660756	chr11	102660697	-	FALSE	hs|11q22.2	4312	NM_002421	matrix metallopeptidase 1 (interstitial collagenase)	chr11:102660756-102660697	GO:0007596|GO:0044419|GO:0030574|GO:0008152|GO:0005509|GO:0006508|GO:0005578|GO:0008270|GO:0008233|GO:0005576|GO:0050900|GO:0004222	NM_002421	Hs.83169
A_23_P13094	0.00155975	40.1061	up	5.63841	10.9642	MMP10	Homo sapiens matrix metallopeptidase 10 (stromelysin 2) (MMP10), mRNA [NM_002425]	102641464	chr11	102641405	-	FALSE	hs|11q22.2	4319	NM_002425	matrix metallopeptidase 10 (stromelysin 2)	chr11:102641464-102641405	GO:0030574|GO:0008152|GO:0005509|GO:0006508|GO:0005578|GO:0008270|GO:0008233|GO:0005576|GO:0004222|GO:0005615	NM_002425	Hs.2258
A_23_P57417	1.21e-07	46.7954	up	5.55367	11.102	MMP11	Homo sapiens matrix metallopeptidase 11 (stromelysin 3) (MMP11), mRNA [NM_005940]	24126332	chr22	24126273	+	FALSE	hs|22q11.23	4320	NM_005940	matrix metallopeptidase 11 (stromelysin 3)	chr22:24126273-24126332	GO:0030574|GO:0005509|GO:0006508|GO:0005578|GO:0008270|GO:0008233|GO:0007275|GO:0005576|GO:0004222	NM_005940	Hs.143751
A_33_P3221203	0.000422	41.6943	up	2.70256	8.08434	MMP13	Homo sapiens matrix metallopeptidase 13 (collagenase 3) (MMP13), mRNA [NM_002427]	102813832	chr11	102813773	-	FALSE	hs|11q22.2	4322	NM_002427	matrix metallopeptidase 13 (collagenase 3)	chr11:102813832-102813773	GO:0005581|GO:0043627|GO:0051216|GO:0030282|GO:0005583|GO:0005764|GO:0005615|GO:0031623|GO:0046581|GO:0030574|GO:0006508|GO:0001968|GO:0043171|GO:0001666|GO:0005794|GO:0005509|GO:0005578|GO:0005576|GO:0009612|GO:0031012|GO:0008152|GO:0035116|GO:0008233|GO:0008270|GO:0004222|GO:0050750|GO:0048306	NM_002427	Hs.2936
A_24_P82106	7.52e-06	3.078	up	9.33881	10.9608	MMP14	Homo sapiens matrix metallopeptidase 14 (membrane-inserted) (MMP14), mRNA [NM_004995]	23315850	chr14	23315791	+	FALSE	hs|14q11.2	4323	NM_004995	matrix metallopeptidase 14 (membrane-inserted)	chr14:23315791-23315850	GO:0005515|GO:0014070|GO:0043627|GO:0048771|GO:0051895|GO:0005737|GO:0001541|GO:0006508|GO:0009725|GO:0006979|GO:0001666|GO:0042470|GO:0005509|GO:0001525|GO:0043615|GO:0009612|GO:0016504|GO:0031012|GO:0005178|GO:0001503|GO:0016020|GO:0005887|GO:0001935|GO:0008152|GO:0008270|GO:0004222	NM_004995	Hs.2399
A_33_P3237135	0.00731708	2.69867	up	8.93271	10.365	MMP2	Homo sapiens matrix metallopeptidase 2 (gelatinase A, 72kDa gelatinase, 72kDa type IV collagenase) (MMP2), transcript variant 1, mRNA [NM_004530]	55540577	chr16	55540518	+	FALSE	hs|16q12.2	4313	NM_004530	matrix metallopeptidase 2 (gelatinase A, 72kDa gelatinase, 72kDa type IV collagenase)	chr16:55540518-55540577	GO:0005515|GO:0001666|GO:0005886|GO:0005578|GO:0005576|GO:0005634|GO:0001525|GO:0030017|GO:0005615|GO:0046872|GO:0043231|GO:0060346|GO:0001957|GO:0060325|GO:0030574|GO:0008152|GO:0006508|GO:0008270|GO:0008233|GO:0004222|GO:0001955	NM_004530	Hs.513617
A_23_P161698	0.00309027	122.999	up	4.19542	11.1379	MMP3	Homo sapiens matrix metallopeptidase 3 (stromelysin 1, progelatinase) (MMP3), mRNA [NM_002422]	102706753	chr11	102706694	-	FALSE	hs|11q22.2	4314	NM_002422	matrix metallopeptidase 3 (stromelysin 1, progelatinase)	chr11:102706753-102706694	GO:0071460|GO:0005634|GO:0005615|GO:0032403|GO:0030425|GO:0043231|GO:0030574|GO:0006508|GO:0032496|GO:0032355|GO:0043200|GO:0070555|GO:0001666|GO:0007565|GO:0005509|GO:0005578|GO:0005576|GO:0044297|GO:0043234|GO:0008152|GO:0042060|GO:0008270|GO:0008233|GO:0034612|GO:0004222	NM_002422	Hs.375129
A_23_P40174	0.00153812	4.25674	up	10.7401	12.8298	MMP9	Homo sapiens matrix metallopeptidase 9 (gelatinase B, 92kDa gelatinase, 92kDa type IV collagenase) (MMP9), mRNA [NM_004994]	44645180	chr20	44645121	+	FALSE	hs|20q13.12	4318	NM_004994	matrix metallopeptidase 9 (gelatinase B, 92kDa gelatinase, 92kDa type IV collagenase)	chr20:44645121-44645180	GO:0005515|GO:0048771|GO:0071460|GO:0051549|GO:0009408|GO:0045471|GO:0005518|GO:0032403|GO:0005615|GO:0046872|GO:0031915|GO:0030198|GO:0030574|GO:0032496|GO:0006508|GO:0030225|GO:0032526|GO:0001968|GO:0032355|GO:0006979|GO:0009314|GO:0001666|GO:0019087|GO:0060033|GO:0043065|GO:0007584|GO:0042493|GO:0005578|GO:0005576|GO:0045766|GO:0009612|GO:0071404|GO:0043234|GO:0001501|GO:0001503|GO:0071347|GO:…	NM_004994	Hs.297413
A_33_P3212257	0.00300724	4.49843	down	10.1766	8.00714	MMRN1	Homo sapiens multimerin 1 (MMRN1), mRNA [NM_007351]	90875730	chr4	90875671	+	FALSE	hs|4q22.1	22915	NM_007351	multimerin 1	chr4:90875671-90875730	GO:0007596|GO:0002576|GO:0030168|GO:0031093|GO:0005576|GO:0007155	NM_007351	Hs.268107
A_24_P83678	0.00693208	2.17235	up	6.61386	7.73312	MMS22L	Homo sapiens MMS22-like, DNA repair protein (MMS22L), mRNA [NM_198468]	97597747	chr6	97594723	-	FALSE	hs|6q16.1	253714	NM_198468	MMS22-like, DNA repair protein	chr6:97597747-97594723	GO:0005515|GO:0042555|GO:0035101|GO:0006281|GO:0000724|GO:0031297|GO:0005634|GO:0043596	NM_198468	Hs.444292
A_33_P3215933	0.00175791	3.25824	down	8.68821	6.98412	MPZL3	Homo sapiens myelin protein zero-like 3 (MPZL3), mRNA [NM_198275]	118100396	chr11	118100337	-	FALSE	hs|11q23.3	196264	NM_198275	myelin protein zero-like 3	chr11:118100396-118100337	GO:0042633|GO:0016020|GO:0030198|GO:0016021|GO:0007155	NM_198275	Hs.15396
A_24_P270033	0.00216505	3.14311	down	12.0817	10.4295	MPZL3	myelin protein zero-like 3 [Source:HGNC Symbol;Acc:27279] [ENST00000278949]	118097483	chr11	118097424	-	FALSE	hs|11q23.3	196264	AK095399	myelin protein zero-like 3	chr11:118097483-118097424	GO:0042633|GO:0016020|GO:0030198|GO:0016021|GO:0007155	NA	Hs.15396
A_23_P108948	0.0003	2.08364	down	10.5098	9.45067	MREG	Homo sapiens melanoregulin (MREG), mRNA [NM_018000]	216808159	chr2	216808100	-	FALSE	hs|2q35	55686	NM_018000	melanoregulin	chr2:216808159-216808100	GO:0016324|GO:0005886|GO:0042640|GO:0030318|GO:0048066	NM_018000	Hs.620391
A_23_P256948	0.00409875	2.53292	up	4.69996	6.04077	MSC	Homo sapiens musculin (MSC), mRNA [NM_005098]	72754906	chr8	72754847	-	FALSE	hs|8q13.3	9242	NM_005098	musculin	chr8:72754906-72754847	GO:0006355|GO:0003700|GO:0006366|GO:0003714|GO:0005634|GO:0003677	NM_005098	Hs.442619
A_23_P73589	0.00190381	2.2129	up	12.3029	13.4489	MSN	Homo sapiens moesin (MSN), mRNA [NM_002444]	64961660	chrX	64961601	+	FALSE	hs|Xq12	4478	NM_002444	moesin	chrX:64961601-64961660	GO:0005515|GO:0005886|GO:0031527|GO:0006928|GO:0031528|GO:0005634|GO:0030175|GO:0050900|GO:0005737|GO:0016324|GO:0007159|GO:0022614|GO:0005856|GO:0050839|GO:0009986|GO:0005730|GO:0005102|GO:0045177|GO:0005625|GO:0003779|GO:0005902|GO:0005200|GO:0009898|GO:0005925|GO:0019898|GO:0030667	NM_002444	Hs.87752
A_23_P392942	0.00503451	7.60785	up	4.87407	7.80156	MSR1	Homo sapiens macrophage scavenger receptor 1 (MSR1), transcript variant SR-AII, mRNA [NM_002445]	15998022	chr8	15997963	-	FALSE	hs|8p22	4481	NM_002445	macrophage scavenger receptor 1	chr8:15998022-15997963	GO:0005515|GO:0005581|GO:0005886|GO:0010744|GO:0030169|GO:0030301|GO:0031410|GO:0010886|GO:0042221|GO:0006898|GO:0005829|GO:0042953|GO:0005887|GO:0034381|GO:0034362|GO:0004872|GO:0005044	NM_002445	Hs.147635
A_23_P15174	0.00564319	2.33444	up	9.05618	10.2793	MT1F	Homo sapiens metallothionein 1F (MT1F), mRNA [NM_005949]	56693136	chr16	56693077	+	FALSE	hs|16q12.2	4494	NM_005949	metallothionein 1F	chr16:56693077-56693136	GO:0008150|GO:0005737|GO:0005507|GO:0008270|GO:0046870|GO:0046872	NM_005949	Hs.513626
A_23_P24332	0.00332341	7.14257	down	9.30217	6.46573	MUC15	Homo sapiens mucin 15, cell surface associated (MUC15), transcript variant 2, mRNA [NM_145650]	26582523	chr11	26582464	-	FALSE	hs|11p14.2	143662	NM_145650	mucin 15, cell surface associated	chr11:26582523-26582464	GO:0005886|GO:0005576|GO:0016021	NM_145650	Hs.407152
A_33_P3275035	0.00308036	127.251	down	14.1706	7.1791	MUC21	Homo sapiens mucin 21, cell surface associated (MUC21), mRNA [NM_001010909]	30957675	chr6	30957616	+	FALSE	hs|6p21.33	394263	NM_001010909	mucin 21, cell surface associated	chr6:30957616-30957675	GO:0005886|GO:0016021	NM_001010909	Hs.448277
A_24_P272310	0.0025063	3.59526	down	9.56773	7.72163	MUSTN1	Homo sapiens musculoskeletal, embryonic nuclear protein 1 (MUSTN1), mRNA [NM_205853]	52867392	chr3	52867333	-	FALSE	hs|3p21.1	389125	NM_205853	musculoskeletal, embryonic nuclear protein 1	chr3:52867392-52867333	GO:0005654|GO:0005634|GO:0030326|GO:0042246	NM_205853	Hs.556077
A_23_P152125	0.00713796	2.06137	down	9.48325	8.43965	MVD	Homo sapiens mevalonate (diphospho) decarboxylase (MVD), mRNA [NM_002461]	88719738	chr16	88718985	-	FALSE	hs|16q24.3	4597	NM_002461	mevalonate (diphospho) decarboxylase	chr16:88719738-88718985	GO:0006695|GO:0008284|GO:0005782|GO:0042493|GO:0005625|GO:0019287|GO:0008299|GO:0005524|GO:0042803|GO:0016829|GO:0005829|GO:0000166|GO:0016301|GO:0004163|GO:0030544|GO:0005777	NM_002461	Hs.252457
A_23_P105592	0.00216847	2.22287	down	13.0547	11.9023	MVK	Homo sapiens mevalonate kinase (MVK), transcript variant 1, mRNA [NM_000431]	110035000	chr12	110034941	+	FALSE	hs|12q24.11	4598	NM_000431	mevalonate kinase	chr12:110034941-110035000	GO:0006695|GO:0005737|GO:0000166|GO:0004496|GO:0008152|GO:0008299|GO:0005524|GO:0016740|GO:0042802|GO:0005829|GO:0005777	NM_000431	Hs.130607
A_24_P353905	0.000779	2.63077	up	7.72108	9.11657	MXRA8	Homo sapiens matrix-remodelling associated 8 (MXRA8), mRNA [NM_032348]	1289597	chr1	1289452	-	FALSE	hs|1p36.33	54587	NM_032348	matrix-remodelling associated 8	chr1:1289597-1289452	GO:0016020|GO:0016021	NM_032348	Hs.515687
A_33_P3539345	0.00242841	3.80767	down	11.5093	9.58043	MYO6	Homo sapiens myosin VI (MYO6), mRNA [NM_004999]	76624848	chr6	76624789	+	FALSE	hs|6q14.1	4646	NM_004999	myosin VI	chr6:76624789-76624848	GO:0005515|GO:0005516|GO:0048471|GO:0051046|GO:0005886|GO:0007605|GO:0007268|GO:0005634|GO:0030139|GO:0006886|GO:0005829|GO:0005737|GO:0003774|GO:0051015|GO:0016461|GO:0000166|GO:0045944|GO:0060001|GO:0005938|GO:0030048|GO:0031965|GO:0005794|GO:0030330|GO:0032587|GO:0003779|GO:0005524|GO:0001726|GO:0006897|GO:0030665|GO:0005905|GO:0045334|GO:0031941|GO:0043531|GO:0016591|GO:0016023|GO:0005654	NM_004999	Hs.149387
A_23_P1320	0.00819261	6.83929	down	7.13625	4.3624	MYOZ1	Homo sapiens myozenin 1 (MYOZ1), mRNA [NM_021245]	75391915	chr10	75391856	-	FALSE	hs|10q22.2	58529	NM_021245	myozenin 1	chr10:75391915-75391856	GO:0005515|GO:0030239|GO:0005634|GO:0051373|GO:0015629|GO:0031143	NM_021245	Hs.238756
A_23_P326760	4.4e-05	4.38601	down	8.23437	6.10146	MYRIP	Homo sapiens myosin VIIA and Rab interacting protein (MYRIP), mRNA [NM_015460]	40301784	chr3	40301725	+	FALSE	hs|3p22.1	25924	NM_015460	myosin VIIA and Rab interacting protein	chr3:40301725-40301784	GO:0005515|GO:0042470|GO:0017137|GO:0005737|GO:0045202|GO:0017022|GO:0008270|GO:0003779|GO:0015629|GO:0006886|GO:0046872|GO:0001750	NM_015460	Hs.594535
A_23_P154208	0.000982	2.53183	down	12.268	10.9278	NAGK	Homo sapiens N-acetylglucosamine kinase (NAGK), mRNA [NM_017567]	71300639	chr2	71299850	+	FALSE	hs|2p13.3	55577	NM_017567	N-acetylglucosamine kinase	chr2:71299850-71300639	GO:0005515|GO:0000166|GO:0016301|GO:0006051|GO:0006044|GO:0045127|GO:0005625|GO:0009384|GO:0005524|GO:0016740	NM_017567	Hs.7036
A_23_P409168	7.17e-05	2.41255	down	10.6498	9.37922	NBEAL2	Homo sapiens neurobeachin-like 2 (NBEAL2), mRNA [NM_015175]	47050070	chr3	47050011	+	FALSE	hs|3p21.31	23218	NM_015175	neurobeachin-like 2	chr3:47050011-47050070	GO:0005488	NM_015175	Hs.437043
A_33_P3305770	0.00661942	3.37753	down	5.81684	4.06088	NBR1	neighbor of BRCA1 gene 1 [Source:HGNC Symbol;Acc:6746] [ENST00000389311]	41361651	chr17	41361592	+	FALSE	hs|17q21.31	4077	BC009808	neighbor of BRCA1 gene 1	chr17:41361592-41361651	GO:0005515|GO:0043130|GO:0005776|GO:0005770|GO:0016236|GO:0031410|GO:0005764|GO:0030017|GO:0051259|GO:0046872|GO:0005829|GO:0005737|GO:0008270	NA	Hs.277721
A_33_P3411477	0.00204309	6.67956	down	16.133	13.3933	NCCRP1	Homo sapiens non-specific cytotoxic cell receptor protein 1 homolog (zebrafish) (NCCRP1), mRNA [NM_001001414]	39692520	chr19	39692461	+	FALSE	hs|19q13.2	342897	NM_001001414	non-specific cytotoxic cell receptor protein 1 homolog (zebrafish)	chr19:39692461-39692520	GO:0030163	NM_001001414	Hs.726934
A_33_P3392882	0.000502	2.1759	down	6.86092	5.7393	NCKAP5	Homo sapiens NCK-associated protein 5 (NCKAP5), transcript variant 2, mRNA [NM_207481]	133721356	chr2	133721297	-	FALSE	hs|2q21.2	344148	NM_207481	NCK-associated protein 5	chr2:133721356-133721297	GO:0005515|GO:0008150|GO:0005575	NM_207481	Hs.537329
A_23_P110266	0.00791187	3.09177	down	7.05988	5.43145	NDNF	Homo sapiens neuron-derived neurotrophic factor (NDNF), mRNA [NM_024574]	121957475	chr4	121957416	-	FALSE	hs|4q27	79625	NM_024574	neuron-derived neurotrophic factor	chr4:121957475-121957416	GO:0031012|GO:0019800|GO:0043524|GO:0030198|GO:0010976|GO:0010811|GO:0016049|GO:0005576|GO:0005539|GO:0001764|GO:0008201	NM_024574	Hs.709520
A_33_P3223607	0.00419064	2.40007	down	13.5438	12.2807	NDOR1	Homo sapiens NADPH dependent diflavin oxidoreductase 1 (NDOR1), transcript variant 1, mRNA [NM_001144026]	140113813	chr9	140113756	+	FALSE	hs|9q34.3	27158	NM_001144026	NADPH dependent diflavin oxidoreductase 1	chr9:140113756-140113813	GO:0005515|GO:0050661|GO:0008219|GO:0048471|GO:0005506|GO:0010181|GO:0050660|GO:0005634|GO:0005829|GO:0005737|GO:0016491|GO:0045111|GO:0055114	NM_001144026	Hs.512564
A_33_P3334515	0.00125803	2.58061	down	14.6829	13.3152	NDRG2	Homo sapiens NDRG family member 2 (NDRG2), transcript variant 1, mRNA [NM_201535]	21484991	chr14	21484932	-	FALSE	hs|14q11.2	57447	NM_201535	NDRG family member 2	chr14:21484991-21484932	GO:0048471|GO:0005813|GO:0005794|GO:0005730|GO:0048662|GO:0001818|GO:0005634|GO:0007275|GO:0010574|GO:0030154|GO:0005829|GO:0007399|GO:0003674|GO:0007165|GO:0005737|GO:0090361|GO:0070373	NM_201535	Hs.525205
A_23_P155301	0.00444222	2.07903	up	6.44814	7.50405	NEK11	Homo sapiens NIMA (never in mitosis gene a)- related kinase 11 (NEK11), transcript variant 2, mRNA [NM_145910]	130889720	chr3	130889661	+	FALSE	hs|3q22.1	79858	NM_145910	NIMA (never in mitosis gene a)- related kinase 11	chr3:130889661-130889720	GO:0005515|GO:0007049|GO:0000166|GO:0004674|GO:0031573|GO:0005730|GO:0006468|GO:0005634|GO:0005524|GO:0046872|GO:0007243|GO:0042802	NM_145910	Hs.657336
A_24_P319613	0.00831062	3.4876	up	5.81726	7.6195	NEK2	Homo sapiens NIMA (never in mitosis gene a)-related kinase 2 (NEK2), transcript variant 1, mRNA [NM_002497]	211842647	chr1	211842588	-	FALSE	hs|1q32.3	4751	NM_002497	NIMA (never in mitosis gene a)-related kinase 2	chr1:211842647-211842588	GO:0005515|GO:0005634|GO:0046872|GO:0005829|GO:0005737|GO:0046777|GO:0007059|GO:0000166|GO:0000086|GO:0000794|GO:0005813|GO:0007088|GO:0005694|GO:0019903|GO:0005730|GO:0030496|GO:0005524|GO:0043234|GO:0000922|GO:0000070|GO:0007067|GO:0004672|GO:0007126|GO:0004674|GO:0051299|GO:0000777|GO:0000776|GO:0006468|GO:0000278|GO:0051301	NM_002497	Hs.153704
A_23_P163087	0.000866	2.46972	up	9.71163	11.016	NID2	Homo sapiens nidogen 2 (osteonidogen) (NID2), mRNA [NM_007361]	52471790	chr14	52471731	-	FALSE	hs|14q22.1	22795	NM_007361	nidogen 2 (osteonidogen)	chr14:52471790-52471731	GO:0031012|GO:0005515|GO:0007160|GO:0005518|GO:0005509|GO:0005576|GO:0007155|GO:0005604	NM_007361	Hs.369840
A_33_P3417086	0.00367606	3.64656	down	9.93506	8.06853	NIPAL1	Homo sapiens NIPA-like domain containing 1 (NIPAL1), mRNA [NM_207330]	48039075	chr4	48039016	+	FALSE	hs|4p12	152519	NM_207330	NIPA-like domain containing 1	chr4:48039016-48039075	GO:0015693|GO:0016020|GO:0016021|GO:0006811	NM_207330	Hs.134190
A_23_P170213	0.00168964	4.70783	down	7.77228	5.53721	NKAIN2	Homo sapiens Na+/K+ transporting ATPase interacting 2 (NKAIN2), transcript variant 1, mRNA [NM_001040214]	124979374	chr6	124676477	+	FALSE	hs|6q22.31	154215	NM_001040214	Na+/K+ transporting ATPase interacting 2	chr6:124676477-124979374	GO:0005886|GO:0016021	NM_001040214	Hs.656604
A_23_P69537	0.00483111	4.90871	down	13.4566	11.1613	NMU	Homo sapiens neuromedin U (NMU), mRNA [NM_006681]	56461505	chr4	56461446	-	FALSE	hs|4q12	10874	NM_006681	neuromedin U	chr4:56461505-56461446	GO:0007586|GO:0005102|GO:0006950|GO:0005576|GO:0009648|GO:0006940|GO:0001696|GO:0019233|GO:0007165|GO:0007186|GO:0045987|GO:0007218|GO:0050806|GO:0043195|GO:0046887|GO:0042922|GO:0042755	NM_006681	Hs.418367
A_23_P47148	0.000207	9.33321	up	5.31528	8.53766	NOX4	Homo sapiens NADPH oxidase 4 (NOX4), transcript variant 1, mRNA [NM_016931]	89059885	chr11	89059826	-	FALSE	hs|11q14.3	50507	NM_016931	NADPH oxidase 4	chr11:89059885-89059826	GO:0051897|GO:0048471|GO:0008285|GO:0030054|GO:0005886|GO:0005783|GO:2000573|GO:0045453|GO:0050660|GO:0005634|GO:0006954|GO:0000166|GO:0016175|GO:0043406|GO:0016174|GO:0070374|GO:0071333|GO:0042554|GO:0007569|GO:0072593|GO:0009055|GO:0035051|GO:0000902|GO:0019826|GO:0005789|GO:0016491|GO:0016021|GO:0005925|GO:0055114|GO:0020037	NM_016931	Hs.371036
A_33_P3224324	1.34e-05	4.87705	up	3.15492	5.44093	NOX4	Homo sapiens NADPH oxidase 4 (NOX4), transcript variant 2, mRNA [NM_001143836]	89223692	chr11	89223633	-	FALSE	hs|11q14.3	50507	NM_001143836	NADPH oxidase 4	chr11:89223692-89223633	GO:0051897|GO:0048471|GO:0008285|GO:0030054|GO:0005886|GO:0005783|GO:2000573|GO:0045453|GO:0050660|GO:0005634|GO:0006954|GO:0000166|GO:0016175|GO:0043406|GO:0016174|GO:0070374|GO:0071333|GO:0042554|GO:0007569|GO:0072593|GO:0009055|GO:0035051|GO:0000902|GO:0019826|GO:0005789|GO:0016491|GO:0016021|GO:0005925|GO:0055114|GO:0020037	NM_001143836	Hs.371036
A_24_P409346	0.000601	2.05363	down	10.2327	9.19457	NPEPPS	Homo sapiens aminopeptidase puromycin sensitive (NPEPPS), mRNA [NM_006310]	45662879	chr17	45660170	+	FALSE	hs|17q21.32	9520	NM_006310	aminopeptidase puromycin sensitive	chr17:45660170-45662879	GO:0005515|GO:0005737|GO:0004177|GO:0006508|GO:0008270|GO:0008233|GO:0005634|GO:0046872|GO:0008237|GO:0005829	NM_006310	Hs.443837
A_33_P3214119	0.0036247	2.04196	down	9.39971	8.36975	NPEPPS	aminopeptidase puromycin sensitive [Source:HGNC Symbol;Acc:7900] [ENST00000528751]	45654525	chr17	45654466	+	FALSE	hs|17q21.32	9520	AK311414	aminopeptidase puromycin sensitive	chr17:45654466-45654525	GO:0005515|GO:0005737|GO:0004177|GO:0006508|GO:0008270|GO:0008233|GO:0005634|GO:0046872|GO:0008237|GO:0005829	NA	NA
A_23_P352799	0.00720248	5.36975	up	4.93523	7.36009	NPW	Homo sapiens neuropeptide W (NPW), mRNA [NM_001099456]	2070239	chr16	2070180	+	FALSE	hs|16p13.3	283869	NM_001099456	neuropeptide W	chr16:2070180-2070239	GO:0005515|GO:0007631|GO:0001664|GO:0007186|GO:0007218|GO:0005576	NM_001099456	Hs.233533
A_23_P69699	0.00807406	3.16753	down	6.36989	4.70653	NPY1R	Homo sapiens neuropeptide Y receptor Y1 (NPY1R), mRNA [NM_000909]	164245435	chr4	164245376	-	FALSE	hs|4q32.2	4886	NM_000909	neuropeptide Y receptor Y1	chr4:164245435-164245376	GO:0005515|GO:0030424|GO:0007631|GO:0005886|GO:0004930|GO:0051481|GO:0007193|GO:0019233|GO:0003151|GO:0008021|GO:0005829|GO:0046888|GO:0004983|GO:0045907|GO:0005887|GO:0007187|GO:0040014|GO:0008217|GO:0001602|GO:0001601|GO:0006006|GO:0007626|GO:0004872|GO:0032355	NM_000909	Hs.519057
A_23_P25396	0.000252	2.1144	down	4.18947	3.10922	NR1H4	Homo sapiens nuclear receptor subfamily 1, group H, member 4 (NR1H4), transcript variant 3, mRNA [NM_005123]	100957250	chr12	100957191	+	FALSE	hs|12q23.1	9971	NM_005123	nuclear receptor subfamily 1, group H, member 4	chr12:100957191-100957250	GO:0005515|GO:0034339|GO:0010467|GO:0003700|GO:0003714|GO:0003713|GO:0003707|GO:0005634|GO:0046872|GO:0006351|GO:0043565|GO:0007165|GO:0005654|GO:0008206|GO:0008270|GO:0004879|GO:0004887|GO:0030522	NM_005123	Hs.282735
A_23_P392470	0.00930172	3.31659	down	7.3392	5.6095	NR3C2	Homo sapiens nuclear receptor subfamily 3, group C, member 2 (NR3C2), transcript variant 1, mRNA [NM_000901]	149000423	chr4	149000364	-	FALSE	hs|4q31.23	4306	NM_000901	nuclear receptor subfamily 3, group C, member 2	chr4:149000423-149000364	GO:0005515|GO:0034339|GO:0010467|GO:0003700|GO:0005783|GO:0003707|GO:0005634|GO:0046872|GO:0006351|GO:0043565|GO:0007165|GO:0005737|GO:0016020|GO:0043401|GO:0005789|GO:0004872|GO:0005654|GO:0008270|GO:0005496	NM_000901	Hs.163924
A_33_P3301514	0.00102815	2.24788	up	5.85532	7.02389	NRCAM	Homo sapiens neuronal cell adhesion molecule (NRCAM), transcript variant 4, mRNA [NM_001193582]	107799985	chr7	107799926	-	FALSE	hs|7q31.1	4897	NM_001193582	neuronal cell adhesion molecule	chr7:107799985-107799926	GO:0043005|GO:0030424|GO:0005886|GO:0030506|GO:0045202|GO:0001525|GO:0007409|GO:0007417|GO:0007416|GO:0019227|GO:0030516|GO:0016337|GO:0007413|GO:0008104|GO:0045162|GO:0045666|GO:0005887|GO:0007411|GO:0001764|GO:0009897	NM_001193582	Hs.21422
A_23_P213699	0.000581	7.01941	down	8.16575	5.3544	NRG2	Homo sapiens neuregulin 2 (NRG2), transcript variant 3, mRNA [NM_013982]	139227327	chr5	139227268	-	FALSE	hs|5q31.2	9542	NM_013982	neuregulin 2	chr5:139227327-139227268	GO:0005006|GO:0007165|GO:0005154|GO:0005886|GO:0005102|GO:0005576|GO:0016021|GO:0009790|GO:0008083|GO:0043125	NM_013982	Hs.408515
A_24_P50801	0.00378971	2.18624	up	5.60533	6.73378	NRP2	Homo sapiens neuropilin 2 (NRP2), transcript variant 6, mRNA [NM_201264]	206608139	chr2	206608080	+	FALSE	hs|2q33.3	8828	NM_201264	neuropilin 2	chr2:206608080-206608139	GO:0048010|GO:0030424|GO:0005886|GO:0001755|GO:0050919|GO:0005624|GO:0007275|GO:0071445|GO:0001525|GO:0046872|GO:0030154|GO:0007399|GO:0007507|GO:0017154|GO:0007411|GO:0004872|GO:0005021|GO:0016021|GO:0007155|GO:0008201	NM_201264	Hs.471200
A_23_P393727	0.000539	2.92123	up	4.94522	6.4918	NRP2	Homo sapiens neuropilin 2 (NRP2), transcript variant 1, mRNA [NM_201266]	206659762	chr2	206659703	+	FALSE	hs|2q33.3	8828	NM_201266	neuropilin 2	chr2:206659703-206659762	GO:0048010|GO:0030424|GO:0005886|GO:0001755|GO:0050919|GO:0005624|GO:0007275|GO:0071445|GO:0001525|GO:0046872|GO:0030154|GO:0007399|GO:0007507|GO:0017154|GO:0007411|GO:0004872|GO:0005021|GO:0016021|GO:0007155|GO:0008201	NM_201266	Hs.471200
A_33_P3296333	0.00276781	2.01406	up	7.33618	8.34629	NTM	Homo sapiens neurotrimin (NTM), transcript variant 3, mRNA [NM_001144058]	132206551	chr11	132206492	+	FALSE	hs|11q25	50863	NM_001144058	neurotrimin	chr11:132206492-132206551	GO:0008038|GO:0005886|GO:0031225|GO:0007155	NM_001144058	Hs.504352
A_23_P205900	0.00847975	2.81518	down	6.00413	4.51091	NTRK3	Homo sapiens neurotrophic tyrosine kinase, receptor, type 3 (NTRK3), transcript variant 1, mRNA [NM_001012338]	88420244	chr15	88420185	-	FALSE	hs|15q25.3	4916	NM_001012338	neurotrophic tyrosine kinase, receptor, type 3	chr15:88420244-88420185	GO:0005886|GO:0071300|GO:0019056|GO:0045471|GO:0048678|GO:0030154|GO:0005737|GO:0046777|GO:0000166|GO:0016301|GO:0090102|GO:0060548|GO:0051412|GO:0042490|GO:0043121|GO:0006950|GO:0005624|GO:0048665|GO:0007275|GO:0005524|GO:0007399|GO:0048712|GO:0005030|GO:0000139|GO:0005887|GO:0048691|GO:0006468|GO:0004714|GO:0001764|GO:0007169	NM_001012338	Hs.410969
A_32_P141969	0.00589246	3.9034	down	6.06328	4.09854	NTRK3	neurotrophic tyrosine kinase, receptor, type 3 [Source:HGNC Symbol;Acc:8033] [ENST00000394480]	88403151	chr15	88403092	-	FALSE	hs|15q25.3	4916	AK094929	neurotrophic tyrosine kinase, receptor, type 3	chr15:88403151-88403092	GO:0005886|GO:0071300|GO:0019056|GO:0045471|GO:0048678|GO:0030154|GO:0005737|GO:0046777|GO:0000166|GO:0016301|GO:0090102|GO:0060548|GO:0051412|GO:0042490|GO:0043121|GO:0006950|GO:0005624|GO:0048665|GO:0007275|GO:0005524|GO:0007399|GO:0048712|GO:0005030|GO:0000139|GO:0005887|GO:0048691|GO:0006468|GO:0004714|GO:0001764|GO:0007169	NA	Hs.185701
A_23_P348257	0.000131	2.02641	up	10.8494	11.8683	NUAK1	Homo sapiens NUAK family, SNF1-like kinase, 1 (NUAK1), mRNA [NM_014840]	106457605	chr12	106457546	-	FALSE	hs|12q23.3	9891	NM_014840	NUAK family, SNF1-like kinase, 1	chr12:106457605-106457546	GO:0005515|GO:0000166|GO:0004674|GO:0005524|GO:0046872	NM_014840	Hs.728863
A_33_P3338166	0.0061238	2.51984	down	12.8253	11.492	NUAK2	Homo sapiens NUAK family, SNF1-like kinase, 2 (NUAK2), mRNA [NM_030952]	205271252	chr1	205271193	-	FALSE	hs|1q32.1	81788	NM_030952	NUAK family, SNF1-like kinase, 2	chr1:205271252-205271193	GO:0043066|GO:0030036|GO:0000287|GO:0000166|GO:0004674|GO:0006468|GO:0042149|GO:0005524	NM_030952	Hs.497512
A_23_P13364	0.00745602	3.43488	down	13.3228	11.5426	NUCB2	Homo sapiens nucleobindin 2 (NUCB2), mRNA [NM_005013]	17351826	chr11	17351767	+	FALSE	hs|11p15.1	4925	NM_005013	nucleobindin 2	chr11:17351767-17351826	GO:0005793|GO:0005737|GO:0005794|GO:0005886|GO:0005509|GO:0005576|GO:0005615|GO:0003677|GO:0005829	NM_005013	Hs.654599
A_23_P46852	0.00234234	2.54763	down	11.0531	9.70397	OBFC1	Homo sapiens oligonucleotide/oligosaccharide-binding fold containing 1 (OBFC1), mRNA [NM_024928]	105657329	chr10	105651975	-	FALSE	hs|10q24.33	79991	NM_024928	oligonucleotide/oligosaccharide-binding fold containing 1	chr10:105657329-105651975	GO:0005515|GO:0070188|GO:0003697|GO:0000723|GO:0005694|GO:0045740|GO:0010833|GO:0005634|GO:0043047|GO:0003677|GO:0000784	NM_024928	Hs.62314
A_23_P58228	0.00773474	3.87238	up	4.83167	6.78489	ODAM	Homo sapiens odontogenic, ameloblast asssociated (ODAM), mRNA [NM_017855]	71068922	chr4	71068625	+	FALSE	hs|4q13.3	54959	NM_017855	odontogenic, ameloblast asssociated	chr4:71068625-71068922	GO:0042475|GO:0043205|GO:0005576|GO:0031214	NM_017855	Hs.143811
A_24_P69053	0.00551525	2.85996	up	4.19959	5.71559	ODZ3	Homo sapiens odz, odd Oz/ten-m homolog 3 (Drosophila) (ODZ3), mRNA [NM_001080477]	183717903	chr4	183717844	+	FALSE	hs|4q35.1	55714	NM_001080477	odz, odd Oz/ten-m homolog 3 (Drosophila)	chr4:183717844-183717903	GO:0007165|GO:0016020|GO:0016021	NM_001080477	Hs.130438
A_23_P7791	0.000377	2.10346	down	11.1889	10.1161	OGFRL1	Homo sapiens opioid growth factor receptor-like 1 (OGFRL1), mRNA [NM_024576]	72011872	chr6	72011813	+	FALSE	hs|6q13	79627	NM_024576	opioid growth factor receptor-like 1	chr6:72011813-72011872	GO:0016020|GO:0004872	NM_024576	Hs.656091
A_33_P3306762	0.00315626	10.3045	down	8.90355	5.53835	OLFM1	olfactomedin 1 [Source:HGNC Symbol;Acc:17187] [ENST00000371801]	137967989	chr9	137967930	+	FALSE	hs|9q34.3	10439	NA	olfactomedin 1	chr9:137967930-137967989	GO:0005515|GO:0005783|GO:0005788|GO:0007275|GO:0051259|GO:0005615|GO:0007399	NA	NA
A_33_P3401243	0.000708	2.76324	up	7.19881	8.66517	OLFML2B	Homo sapiens olfactomedin-like 2B (OLFML2B), mRNA [NM_015441]	161953465	chr1	161953406	-	FALSE	hs|1q23.3	25903	NM_015441	olfactomedin-like 2B	chr1:161953465-161953406	GO:0031012|GO:0030198|GO:0050840|GO:0005576	NM_015441	Hs.507515
A_24_P124624	0.000974	5.72433	up	2.98557	5.50268	OLR1	Homo sapiens oxidized low density lipoprotein (lectin-like) receptor 1 (OLR1), transcript variant 1, mRNA [NM_002543]	10311657	chr12	10311598	-	FALSE	hs|12p13.2	4973	NM_002543	oxidized low density lipoprotein (lectin-like) receptor 1	chr12:10311657-10311598	GO:0042542|GO:0008219|GO:0005886|GO:0008015|GO:0005529|GO:0005624|GO:0005576|GO:0050900|GO:0005041|GO:0006954|GO:0005488|GO:0005887|GO:0007596|GO:0042157|GO:0006508|GO:0007159|GO:0004872|GO:0007155	NM_002543	Hs.412484
A_33_P3213962	0.00773147	2.22831	down	7.173	6.01704	OR13A1	Homo sapiens olfactory receptor, family 13, subfamily A, member 1 (OR13A1), mRNA [NM_001004297]	45798161	chr10	45798102	-	FALSE	hs|10q11.21	79290	NM_001004297	olfactory receptor, family 13, subfamily A, member 1	chr10:45798161-45798102	GO:0004984|GO:0005886|GO:0004930|GO:0004872|GO:0016021|GO:0050896	NM_001004297	Hs.532435
A_23_P134566	0.00757703	7.68187	down	9.11217	6.17071	OR2A7	Homo sapiens olfactory receptor, family 2, subfamily A, member 7 (OR2A7), mRNA [NM_001005328]	143956079	chr7	143956020	-	FALSE	hs|7q35	401427	NM_001005328	olfactory receptor, family 2, subfamily A, member 7	chr7:143956079-143956020	GO:0004984|GO:0005886|GO:0004930|GO:0004872|GO:0016021|GO:0050896	NM_001005328	Hs.731183
A_33_P3346529	0.000783	14.0443	down	8.19384	4.38193	OR2W5	Homo sapiens olfactory receptor, family 2, subfamily W, member 5 (OR2W5), mRNA [NM_001004698]	247655282	chr1	247655223	+	FALSE	hs|1q44	441932	NM_001004698	olfactory receptor, family 2, subfamily W, member 5	chr1:247655223-247655282	GO:0004984|GO:0005886|GO:0004930|GO:0004872|GO:0016021|GO:0050896	NM_001004698	Hs.591526
A_33_P3424491	0.00145947	4.51001	up	5.59051	7.76364	OR51E1	Homo sapiens olfactory receptor, family 51, subfamily E, member 1 (OR51E1), mRNA [NM_152430]	4676715	chr11	4676656	+	FALSE	hs|11p15.4	143503	NM_152430	olfactory receptor, family 51, subfamily E, member 1	chr11:4676656-4676715	GO:0004984|GO:0005886|GO:0004930|GO:0004872|GO:0016021|GO:0050896	NM_152430	Hs.470038
A_33_P3322769	0.00840882	2.64564	down	6.30996	4.90634	OR51G2	Homo sapiens olfactory receptor, family 51, subfamily G, member 2 (OR51G2), mRNA [NM_001005238]	4936039	chr11	4935980	-	FALSE	hs|11p15.4	81282	NM_001005238	olfactory receptor, family 51, subfamily G, member 2	chr11:4936039-4935980	GO:0004984|GO:0005886|GO:0004930|GO:0004872|GO:0016021|GO:0050896	NM_001005238	Hs.542302
A_23_P350754	0.00258798	2.65719	down	9.81277	8.40287	OR7E13P	Homo sapiens olfactory-like receptor PJCG2 (PJCG2) mRNA, partial cds. [AF238487]	86543934	chr11	86543875	-	FALSE	hs|11q14.2	10820	AF238487	olfactory receptor, family 7, subfamily E, member 13 pseudogene	chr11:86543934-86543875	NA	NA	Hs.684491
A_23_P365201	0.00081	3.59843	down	6.32092	4.47356	OTOP3	Homo sapiens otopetrin 3 (OTOP3), mRNA [NM_178233]	72942780	chr17	72939785	+	FALSE	hs|17q25.1	347741	NM_178233	otopetrin 3	chr17:72939785-72942780	GO:0005622|GO:0016020|GO:0008270|GO:0016021	NM_178233	Hs.454407
A_23_P403284	0.00492013	3.18347	up	8.07757	9.74817	OTX1	Homo sapiens orthodenticle homeobox 1 (OTX1), transcript variant 1, mRNA [NM_014562]	63284248	chr2	63284189	+	FALSE	hs|2p15	5013	NM_014562	orthodenticle homeobox 1	chr2:63284189-63284248	GO:0043565|GO:0005515|GO:0006355|GO:0042472|GO:0003700|GO:0006357|GO:0030901|GO:0007275|GO:0005634|GO:0030900|GO:0009952|GO:0006351	NM_014562	Hs.445340
A_33_P3362088	0.00178716	2.00842	up	10.7754	11.7815	P2RX4	Homo sapiens purinergic receptor P2X, ligand-gated ion channel, 4 (P2RX4), mRNA [NM_002560]	121671907	chr12	121671848	+	FALSE	hs|12q24.31	5025	NM_002560	purinergic receptor P2X, ligand-gated ion channel, 4	chr12:121671848-121671907	GO:0030424|GO:0048471|GO:0051899|GO:0030054|GO:0005886|GO:0051928|GO:0010524|GO:0034405|GO:0045202|GO:0042803|GO:0019228|GO:0050850|GO:0045429|GO:0010614|GO:0043197|GO:0001894|GO:0043195|GO:0008144|GO:0043025|GO:0006810|GO:0033198|GO:0001614|GO:0051260|GO:0004872|GO:0006811|GO:0035590|GO:0045296|GO:0004931|GO:0005507|GO:0005102|GO:0006950|GO:0014069|GO:0042981|GO:0005524|GO:0019233|GO:0007165|GO:…	NM_002560	Hs.321709
A_24_P165864	0.00255801	2.09161	down	9.88094	8.81633	P2RY14	Homo sapiens purinergic receptor P2Y, G-protein coupled, 14 (P2RY14), transcript variant 2, mRNA [NM_014879]	150930118	chr3	150930059	-	FALSE	hs|3q25.1	9934	NM_014879	purinergic receptor P2Y, G-protein coupled, 14	chr3:150930118-150930059	GO:0045029|GO:0006955|GO:0007186|GO:0005886|GO:0045028|GO:0004930|GO:0004872|GO:0016021	NM_014879	Hs.2465
A_23_P24903	0.00110722	2.94381	down	11.9703	10.4126	P2RY2	Homo sapiens purinergic receptor P2Y, G-protein coupled, 2 (P2RY2), transcript variant 1, mRNA [NM_176072]	72946975	chr11	72946916	+	FALSE	hs|11q13.4	5029	NM_176072	purinergic receptor P2Y, G-protein coupled, 2	chr11:72946916-72946975	GO:0005886|GO:0060406|GO:0007200|GO:0009790|GO:0007204|GO:0005764|GO:0014911|GO:0005739|GO:0016323|GO:0042312|GO:0016324|GO:0030279|GO:0071415|GO:0004872|GO:0004930|GO:0007568|GO:0006873|GO:0031686|GO:0032722|GO:0070848|GO:0045030|GO:0005524|GO:0019233|GO:0005887|GO:0045028|GO:0071347|GO:0010976|GO:0042060|GO:0032308|GO:0005769	NM_176072	Hs.339
A_23_P64611	0.00771637	4.16283	up	7.79721	9.85477	P2RY6	Homo sapiens pyrimidinergic receptor P2Y, G-protein coupled, 6 (P2RY6), transcript variant 2, mRNA [NM_176798]	73008684	chr11	73008625	+	FALSE	hs|11q13.4	5031	NM_176798	pyrimidinergic receptor P2Y, G-protein coupled, 6	chr11:73008625-73008684	GO:0005886|GO:0045028|GO:0005887|GO:0004930|GO:0007200|GO:0004872	NM_176798	Hs.16362
A_24_P162454	0.00438231	3.12736	down	8.05434	6.40939	PABPC1L2B	Homo sapiens poly(A) binding protein, cytoplasmic 1-like 2B (PABPC1L2B), mRNA [NM_001042506]	72225231	chrX	72225172	+	FALSE	hs|Xq13.2	645974	NM_001042506	poly(A) binding protein, cytoplasmic 1-like 2B	chrX:72225172-72225231	GO:0000166|GO:0003723	NM_001042506	Hs.567854
A_33_P3358208	0.00222297	33.953	down	14.0676	8.98214	PADI1	Homo sapiens peptidyl arginine deiminase, type I (PADI1), mRNA [NM_013358]	17572501	chr1	17572442	+	FALSE	hs|1p36.13	29943	NM_013358	peptidyl arginine deiminase, type I	chr1:17572442-17572501	GO:0018101|GO:0005737|GO:0016787|GO:0005509|GO:0004668|GO:0006464	NM_013358	Hs.412941
A_23_P301053	0.00316669	2.60258	down	7.17851	5.79856	PAIP2B	Homo sapiens poly(A) binding protein interacting protein 2B (PAIP2B), mRNA [NM_020459]	71410362	chr2	71410303	-	FALSE	hs|2p13.3	400961	NM_020459	poly(A) binding protein interacting protein 2B	chr2:71410362-71410303	GO:0005515|GO:0005737|GO:0045947|GO:0000900	NM_020459	Hs.416735
A_23_P216579	0.00482771	4.06418	up	3.44395	5.46691	PALM2	Homo sapiens paralemmin 2 (PALM2), transcript variant 1, mRNA [NM_053016]	112705536	chr9	112705477	+	FALSE	hs|9q31.3	114299	NM_053016	paralemmin 2	chr9:112705477-112705536	GO:0005886|GO:0008360	NM_053016	Hs.591908
A_33_P3292235	0.0042076	12.94	down	10.1206	6.42682	PAQR3	progestin and adipoQ receptor family member III [Source:HGNC Symbol;Acc:30130] [ENST00000342820]	79808359	chr4	79808300	-	FALSE	hs|4q21.21	152559	BC031256	progestin and adipoQ receptor family member III	chr4:79808359-79808300	GO:0005794|GO:0016020|GO:0000139|GO:0004872|GO:0016021	NA	NA
A_33_P3368750	0.00820643	3.01042	down	10.0681	8.47816	PAQR5	Homo sapiens progestin and adipoQ receptor family member V (PAQR5), transcript variant 1, mRNA [NM_001104554]	69699954	chr15	69699895	+	FALSE	hs|15q23	54852	NM_001104554	progestin and adipoQ receptor family member V	chr15:69699895-69699954	GO:0048477|GO:0016020|GO:0007275|GO:0004872|GO:0016021|GO:0005496|GO:0030154	NM_001104554	Hs.591096
A_33_P3303372	0.000783	2.23036	down	12.8914	11.7341	PARD3	Homo sapiens par-3 partitioning defective 3 homolog (C. elegans) (PARD3), transcript variant 9, mRNA [NM_001184792]	34620141	chr10	34620082	-	FALSE	hs|10p11.21	56288	NM_001184792	par-3 partitioning defective 3 homolog (C. elegans)	chr10:34620141-34620082	GO:0090162|GO:0008356|GO:0005515|GO:0005886|GO:0034329|GO:0005547|GO:0005546|GO:0032266|GO:0007409|GO:0045216|GO:0007205|GO:0012505|GO:0008289|GO:0005829|GO:0005737|GO:0007049|GO:0007163|GO:0006461|GO:0070830|GO:0005911|GO:0006612|GO:0005923|GO:0005856|GO:0005938	NM_001184792	Hs.131489
A_24_P161018	0.00191501	2.44688	up	10.3301	11.621	PARP14	Homo sapiens poly (ADP-ribose) polymerase family, member 14 (PARP14), mRNA [NM_017554]	122437503	chr3	122437444	+	FALSE	hs|3q21.1	54625	NM_017554	poly (ADP-ribose) polymerase family, member 14	chr3:122437444-122437503	GO:0006355|GO:0005737|GO:0005886|GO:0016757|GO:0005634|GO:0003950	NM_017554	Hs.518203
A_23_P69383	0.00544619	2.01982	up	9.4616	10.4758	PARP9	Homo sapiens poly (ADP-ribose) polymerase family, member 9 (PARP9), transcript variant 1, mRNA [NM_031458]	122247356	chr3	122247297	-	FALSE	hs|3q21.1	83666	NM_031458	poly (ADP-ribose) polymerase family, member 9	chr3:122247356-122247297	GO:0005515|GO:0005737|GO:0016477|GO:0005634|GO:0016740|GO:0005829|GO:0003950	NM_031458	Hs.518200
A_32_P70818	0.00523515	6.14512	down	12.0241	9.4047	PAX9	Homo sapiens paired box 9 (PAX9), mRNA [NM_006194]	37146680	chr14	37146621	+	FALSE	hs|14q13.3	5083	NM_006194	paired box 9	chr14:37146621-37146680	GO:0005515|GO:0006355|GO:0071363|GO:0007492|GO:0045944|GO:0007275|GO:0005634|GO:0045892|GO:0003677	NM_006194	Hs.132576
A_33_P3214914	0.00225676	25.4928	down	9.01765	4.34564	PBMUCL1	Homo sapiens panbronchiolitis related mucin-like 1 (PBMUCL1), mRNA [NM_001198815]	31002715	chr6	31002656	+	FALSE	hs|6p21.33	100507679	NM_001198815	panbronchiolitis related mucin-like 1	chr6:31002656-31002715	GO:0016020|GO:0016021	NM_001198815	Hs.582967
A_33_P3349637	0.00707792	2.63664	down	12.9437	11.545	PCDH1	Homo sapiens protocadherin 1 (PCDH1), transcript variant 1, mRNA [NM_002587]	141242277	chr5	141242218	-	FALSE	hs|5q31.3	5097	NM_002587	protocadherin 1	chr5:141242277-141242218	GO:0005886|GO:0005911|GO:0005887|GO:0005509|GO:0007267|GO:0007155|GO:0007156|GO:0007399	NM_002587	Hs.79769
A_24_P234838	0.00492427	2.40201	down	6.05222	4.78798	PCDH1	Homo sapiens protocadherin 1 (PCDH1), transcript variant 2, mRNA [NM_032420]	141232943	chr5	141232884	-	FALSE	hs|5q31.3	5097	NM_032420	protocadherin 1	chr5:141232943-141232884	GO:0005886|GO:0005911|GO:0005887|GO:0005509|GO:0007267|GO:0007155|GO:0007156|GO:0007399	NM_032420	Hs.79769
A_24_P911906	0.00753661	2.62224	up	5.44151	6.83231	PCDH17	Homo sapiens protocadherin 17 (PCDH17), mRNA [NM_001040429]	58302027	chr13	58301968	+	FALSE	hs|13q21.1	27253	NM_001040429	protocadherin 17	chr13:58301968-58302027	GO:0005515|GO:0005886|GO:0005509|GO:0016021|GO:0007155|GO:0007156	NM_001040429	Hs.106511
A_23_P251499	0.000313	2.20213	up	9.71663	10.8555	PCOLCE	Homo sapiens procollagen C-endopeptidase enhancer (PCOLCE), mRNA [NM_002593]	100204126	chr7	100204067	+	FALSE	hs|7q22.1	5118	NM_002593	procollagen C-endopeptidase enhancer	chr7:100204067-100204126	GO:0031012|GO:0016504|GO:0010952|GO:0005518|GO:0007275|GO:0005576|GO:0008201|GO:0005615	NM_002593	Hs.202097
A_23_P79968	0.0034759	4.73978	down	5.61192	3.3671	PCSK2	Homo sapiens proprotein convertase subtilisin/kexin type 2 (PCSK2), transcript variant 1, mRNA [NM_002594]	17465081	chr20	17465022	+	FALSE	hs|20p12.1	5126	NM_002594	proprotein convertase subtilisin/kexin type 2	chr20:17465022-17465081	GO:0005515|GO:0030133|GO:0016540|GO:0004252|GO:0005625|GO:0031410|GO:0005615|GO:0007399|GO:0034230|GO:0034231|GO:0016020|GO:0006508|GO:0008233|GO:0030070|GO:0030141	NM_002594	Hs.315186
A_33_P3358731	0.00177378	2.18606	down	7.78439	6.65606	PCSK5	Homo sapiens proprotein convertase subtilisin/kexin type 5 (PCSK5), transcript variant 2, mRNA [NM_006200]	78790011	chr9	78789952	+	FALSE	hs|9q21.13	5125	NM_006200	proprotein convertase subtilisin/kexin type 5	chr9:78789952-78790011	GO:0032455|GO:0004252|GO:0002001|GO:0030323|GO:0048706|GO:0007267|GO:0042089|GO:0009952|GO:0005615|GO:0051605|GO:0007507|GO:0016486|GO:0006508|GO:0030141|GO:0035108|GO:0042277|GO:0048011|GO:0005794|GO:0019067|GO:0007566|GO:0005796|GO:0001822|GO:0043043|GO:0005576|GO:0048566|GO:0008233|GO:0006465	NM_006200	Hs.368542
[truncated: 402 more rows]
